# Supplementary material for: Pressure-induced stacking disorder in boehmite
Source: Royal Society of Chemistry journal article supplement (doi:10.1039/c8cp02565g), 2018-01-01
Supplement: c8cp02565g1.xlsx [file c8cp02565g1.xlsx]

## Sheet: Sheet1
	P (GPa)		P (GPa)		P (GPa)		P (GPa)		P (GPa)		P (GPa)		P (GPa)		P (GPa)		P (GPa)		P (GPa)
q (1/angstrom)	4.03	q (1/angstrom)	5.59	q (1/angstrom)	9.9	q (1/angstrom)	16.8	q (1/angstrom)	18.9	q (1/angstrom)	23	q (1/angstrom)	28.5	q (1/angstrom)	32.1	q (1/angstrom)	35.6	q (1/angstrom)	39.2
0.5357	-0.01208	0.5357	-0.00278	0.5357	0.02248	0.5371	-0.09962	0.5371	-0.05254	0.5371	-0.1139	0.5371	-0.01133	0.5371	-0.00556	0.5371	-0.00118	0.5371	-0.0295
0.53749	-0.00857	0.53749	-0.00138	0.53749	0.02019	0.53889	-0.08461	0.53889	-0.05442	0.53889	-0.09947	0.53889	-0.00406	0.53889	-0.01394	0.53889	-0.01728	0.53889	-0.02068
0.53927	-0.00904	0.53927	-0.0014	0.53927	0.01796	0.54068	-0.08062	0.54068	-0.05388	0.54068	-0.09458	0.54068	-0.00102	0.54068	-0.02094	0.54068	-0.02238	0.54068	-0.02299
0.54106	-0.00894	0.54106	-0.00187	0.54106	0.01642	0.54247	-0.07884	0.54247	-0.05187	0.54247	-0.0948	0.54247	0.00404	0.54247	-0.01549	0.54247	-0.01568	0.54247	-0.02999
0.54284	-0.00919	0.54284	-0.00312	0.54284	0.01347	0.54426	-0.0696	0.54426	-0.0468	0.54426	-0.08877	0.54426	0.00228	0.54426	-0.01102	0.54426	-0.01419	0.54426	-0.02851
0.54463	-0.00911	0.54463	-0.00389	0.54463	0.01	0.54605	-0.0655	0.54605	-0.0435	0.54605	-0.08376	0.54605	-0.00649	0.54605	-0.01095	0.54605	-0.02431	0.54605	-0.02231
0.54642	-0.0093	0.54642	-0.00315	0.54642	0.00849	0.54784	-0.06021	0.54784	-0.04475	0.54784	-0.07176	0.54784	-0.01187	0.54784	-0.01193	0.54784	-0.0317	0.54784	-0.00593
0.5482	-0.00909	0.5482	-0.00301	0.5482	0.00885	0.54963	-0.06302	0.54963	-0.04413	0.54963	-0.06232	0.54963	-0.01289	0.54963	-0.00723	0.54963	-0.03281	0.54963	0.00468
0.54999	-0.00876	0.54999	-0.00253	0.54999	0.00768	0.55142	-0.06333	0.55142	-0.0394	0.55142	-0.05755	0.55142	-0.01289	0.55142	-0.00876	0.55142	-0.02957	0.55142	0.01033
0.55177	-0.00904	0.55177	-0.000948734	0.55177	0.00609	0.55321	-0.06225	0.55321	-0.03147	0.55321	-0.05341	0.55321	-0.01368	0.55321	-0.01381	0.55321	-0.01805	0.55321	0.01368
0.55356	-0.00948	0.55356	0.000618313	0.55356	0.00707	0.555	-0.06222	0.555	-0.02602	0.555	-0.04594	0.555	-0.01063	0.555	-0.00472	0.555	-0.0074	0.555	0.01556
0.55534	-0.00961	0.55534	0.0014	0.55534	0.0094	0.55679	-0.06137	0.55679	-0.02138	0.55679	-0.04235	0.55679	-0.01087	0.55679	0.0043	0.55679	0.00156	0.55679	0.01993
0.55713	-0.01028	0.55713	0.00143	0.55713	0.00931	0.55858	-0.06157	0.55858	-0.02092	0.55858	-0.04085	0.55858	-0.0147	0.55858	0.0104	0.55858	0.01267	0.55858	0.0262
0.55891	-0.01133	0.55891	0.000543841	0.55891	0.00966	0.56037	-0.05919	0.56037	-0.02167	0.56037	-0.04321	0.56037	-0.01969	0.56037	0.01856	0.56037	0.00867	0.56037	0.03519
0.5607	-0.0115	0.5607	0.000548815	0.5607	0.01057	0.56216	-0.05517	0.56216	-0.02004	0.56216	-0.0436	0.56216	-0.02225	0.56216	0.02354	0.56216	0.00506	0.56216	0.04106
0.56248	-0.0119	0.56248	0.00167	0.56248	0.01075	0.56395	-0.05092	0.56395	-0.01403	0.56395	-0.03937	0.56395	-0.02211	0.56395	0.02408	0.56395	0.00342	0.56395	0.04264
0.56427	-0.01137	0.56427	0.00159	0.56427	0.00923	0.56574	-0.04764	0.56574	-0.01472	0.56574	-0.03899	0.56574	-0.02952	0.56574	0.01513	0.56574	-0.00237	0.56574	0.03478
0.56605	-0.01107	0.56605	0.00108	0.56605	0.00775	0.56753	-0.0486	0.56753	-0.01702	0.56753	-0.03934	0.56753	-0.03358	0.56753	0.00523	0.56753	0.000881864	0.56753	0.02428
0.56784	-0.01102	0.56784	0.00122	0.56784	0.00728	0.56932	-0.04871	0.56932	-0.01181	0.56932	-0.03845	0.56932	-0.03815	0.56932	-4.35932e-05	0.56932	0.00371	0.56932	0.01184
0.56962	-0.01037	0.56962	0.00233	0.56962	0.00639	0.57111	-0.0515	0.57111	-0.00427	0.57111	-0.03403	0.57111	-0.03827	0.57111	-0.00653	0.57111	0.00445	0.57111	0.00249
0.57141	-0.0101	0.57141	0.00232	0.57141	0.0034	0.5729	-0.05185	0.5729	0.00491	0.5729	-0.02696	0.5729	-0.04098	0.5729	-0.00961	0.5729	0.0087	0.5729	0.00197
0.57319	-0.00973	0.57319	0.00345	0.57319	0.000249806	0.57469	-0.04785	0.57469	0.01012	0.57469	-0.02158	0.57469	-0.04254	0.57469	-0.00598	0.57469	0.00853	0.57469	0.00407
0.57498	-0.00941	0.57498	0.0049	0.57498	-0.00149	0.57648	-0.04325	0.57648	0.01157	0.57648	-0.02317	0.57648	-0.03973	0.57648	-0.00386	0.57648	0.00487	0.57648	0.00087409
0.57676	-0.00926	0.57676	0.0061	0.57676	-0.00493	0.57827	-0.03786	0.57827	0.01583	0.57827	-0.02431	0.57827	-0.04009	0.57827	0.000434132	0.57827	-0.00397	0.57827	-0.00171
0.57855	-0.00886	0.57855	0.00751	0.57855	-0.00669	0.58006	-0.03151	0.58006	0.01684	0.58006	-0.02231	0.58006	-0.03741	0.58006	0.00419	0.58006	-0.00309	0.58006	-0.00686
0.58033	-0.00844	0.58033	0.00783	0.58033	-0.01069	0.58185	-0.0245	0.58185	0.00967	0.58185	-0.019	0.58185	-0.03252	0.58185	0.00467	0.58185	-0.00195	0.58185	-0.0075
0.58212	-0.00831	0.58212	0.008	0.58212	-0.01346	0.58364	-0.02397	0.58364	0.00356	0.58364	-0.0101	0.58364	-0.02458	0.58364	0.00817	0.58364	-0.00174	0.58364	-0.00126
0.5839	-0.00928	0.5839	0.00663	0.5839	-0.01486	0.58543	-0.02797	0.58543	-0.0013	0.58543	-0.00374	0.58543	-0.01596	0.58543	0.00331	0.58543	0.000108669	0.58543	9.83442e-05
0.58569	-0.01014	0.58569	0.00427	0.58569	-0.01511	0.58722	-0.02594	0.58722	-0.00023442	0.58722	0.00436	0.58722	-0.0101	0.58722	0.000774968	0.58722	0.00334	0.58722	0.00288
0.58748	-0.01042	0.58748	0.00245	0.58748	-0.01426	0.58901	-0.02503	0.58901	-0.00606	0.58901	0.01273	0.58901	-0.00535	0.58901	0.00632	0.58901	0.00507	0.58901	0.00118
0.58926	-0.01099	0.58926	0.00142	0.58926	-0.01352	0.5908	-0.02038	0.5908	-0.01015	0.5908	0.00862	0.5908	-0.00492	0.5908	0.01035	0.5908	0.00173	0.5908	-0.00125
0.59105	-0.01142	0.59105	0.000723834	0.59105	-0.01263	0.59259	-0.00989	0.59259	-0.00797	0.59259	0.00604	0.59259	-0.00215	0.59259	0.00916	0.59259	0.00692	0.59259	0.00245
0.59283	-0.01128	0.59283	0.000955769	0.59283	-0.00941	0.59438	-0.00534	0.59438	-0.00594	0.59438	0.00399	0.59438	2.28161e-05	0.59438	0.00942	0.59438	0.01212	0.59438	0.00427
0.59462	-0.01069	0.59462	0.00168	0.59462	-0.00843	0.59617	-0.000239434	0.59617	-0.00112	0.59617	0.00313	0.59617	0.000429364	0.59617	0.01199	0.59617	0.01594	0.59617	0.00317
0.5964	-0.00981	0.5964	0.00175	0.5964	-0.00763	0.59796	0.00662	0.59796	0.00734	0.59796	-0.000733039	0.59796	0.00467	0.59796	0.01415	0.59796	0.02386	0.59796	-0.00224
0.59819	-0.00925	0.59819	0.00228	0.59819	-0.00793	0.59975	0.01298	0.59975	0.01336	0.59975	0.00368	0.59975	0.00534	0.59975	0.01581	0.59975	0.02585	0.59975	0.00119
0.59997	-0.00867	0.59997	0.00181	0.59997	-0.00732	0.60154	0.01512	0.60154	0.01382	0.60154	0.00668	0.60154	0.00631	0.60154	0.01458	0.60154	0.02572	0.60154	-0.000205613
0.60176	-0.00772	0.60176	0.00129	0.60176	-0.00772	0.60333	0.01695	0.60333	0.01282	0.60333	0.00671	0.60333	0.00365	0.60333	0.01505	0.60333	0.0182	0.60333	-0.00738
0.60354	-0.00721	0.60354	0.00186	0.60354	-0.01022	0.60512	0.02181	0.60512	0.0121	0.60512	0.00566	0.60512	-0.00547	0.60512	0.01789	0.60512	0.01304	0.60512	-0.00866
0.60533	-0.0071	0.60533	0.00181	0.60533	-0.01182	0.60691	0.02397	0.60691	0.01012	0.60691	0.00647	0.60691	-0.000636518	0.60691	0.01645	0.60691	0.00401	0.60691	-0.00692
0.60711	-0.00637	0.60711	0.00173	0.60711	-0.01163	0.6087	0.02268	0.6087	-0.000741626	0.6087	0.01116	0.6087	0.00336	0.6087	0.01495	0.6087	-0.00404	0.6087	-0.00207
0.6089	-0.00569	0.6089	0.00168	0.6089	-0.01094	0.61049	0.02153	0.61049	-0.00852	0.61049	0.00898	0.61049	0.01019	0.61049	0.01528	0.61049	-0.00865	0.61049	-0.00601
0.61068	-0.00539	0.61068	0.00169	0.61068	-0.00973	0.61228	0.02064	0.61228	-0.00915	0.61228	0.00636	0.61228	0.01932	0.61228	0.01909	0.61228	-0.0071	0.61228	-0.00688
0.61247	-0.00547	0.61247	0.00195	0.61247	-0.00861	0.61407	0.01795	0.61407	-0.01135	0.61407	0.00523	0.61407	0.02437	0.61407	0.02162	0.61407	0.00137	0.61407	-0.01201
0.61425	-0.00592	0.61425	0.00163	0.61425	-0.00756	0.61586	0.01831	0.61586	-0.01057	0.61586	0.00193	0.61586	0.03196	0.61586	0.02572	0.61586	0.00675	0.61586	-0.02173
0.61604	-0.00601	0.61604	0.000821211	0.61604	-0.0069	0.61765	0.02262	0.61765	-0.0045	0.61765	0.00246	0.61765	0.0277	0.61765	0.03229	0.61765	0.01275	0.61765	-0.02626
0.61782	-0.00658	0.61782	0.000745893	0.61782	-0.00769	0.61944	0.02805	0.61944	-0.0028	0.61944	-0.000891054	0.61944	0.01838	0.61944	0.03336	0.61944	0.01537	0.61944	-0.02955
0.61961	-0.00707	0.61961	1.64501e-05	0.61961	-0.0082	0.62123	0.03525	0.62123	0.00113	0.62123	-0.00302	0.62123	0.00712	0.62123	0.03161	0.62123	0.01708	0.62123	-0.02405
0.62139	-0.00746	0.62139	-0.000528344	0.62139	-0.00878	0.62302	0.04144	0.62302	0.00404	0.62302	0.00107	0.62302	-0.00112	0.62302	0.03358	0.62302	0.01676	0.62302	-0.01244
0.62318	-0.00749	0.62318	-0.000527074	0.62318	-0.00959	0.62481	0.04565	0.62481	0.00736	0.62481	0.00402	0.62481	0.00402	0.62481	0.0307	0.62481	0.01338	0.62481	-0.00849
0.62496	-0.00769	0.62496	-0.000886691	0.62496	-0.00915	0.6266	0.04931	0.6266	0.00847	0.6266	0.00268	0.6266	0.00999	0.6266	0.02826	0.6266	0.01256	0.6266	-0.00803
0.62675	-0.00763	0.62675	-6.25723e-05	0.62675	-0.00744	0.62838	0.05375	0.62838	0.01269	0.62838	-0.00184	0.62838	0.01144	0.62838	0.02628	0.62838	0.02075	0.62838	-0.00691
0.62853	-0.00699	0.62853	0.000842156	0.62853	-0.00425	0.63017	0.05414	0.63017	0.01714	0.63017	-0.00424	0.63017	0.01697	0.63017	0.03099	0.63017	0.02881	0.63017	-0.0025
0.63032	-0.00681	0.63032	0.000314131	0.63032	-0.00282	0.63196	0.05594	0.63196	0.01533	0.63196	-0.00231	0.63196	0.02078	0.63196	0.02826	0.63196	0.02543	0.63196	0.00248
0.6321	-0.00638	0.6321	0.000174915	0.6321	-0.00217	0.63375	0.06029	0.63375	0.01413	0.63375	-0.000717741	0.63375	0.01714	0.63375	0.02495	0.63375	0.02368	0.63375	0.01004
0.63389	-0.00615	0.63389	0.000850194	0.63389	-0.00158	0.63554	0.06163	0.63554	0.0146	0.63554	0.00296	0.63554	0.00828	0.63554	0.02429	0.63554	0.01763	0.63554	0.01624
0.63567	-0.00591	0.63567	0.000248437	0.63567	-0.00172	0.63733	0.05708	0.63733	0.01391	0.63733	0.00666	0.63733	0.00344	0.63733	0.02304	0.63733	0.01278	0.63733	0.01777
0.63746	-0.0061	0.63746	-0.000732931	0.63746	-0.00431	0.63912	0.05571	0.63912	0.01233	0.63912	0.00391	0.63912	0.00507	0.63912	0.02478	0.63912	0.00753	0.63912	0.01853
0.63924	-0.00657	0.63924	-0.000961536	0.63924	-0.0076	0.64091	0.05834	0.64091	0.01006	0.64091	0.00188	0.64091	0.00929	0.64091	0.0264	0.64091	0.00195	0.64091	0.02078
0.64103	-0.00721	0.64103	-0.000921547	0.64103	-0.00943	0.6427	0.05372	0.6427	0.00561	0.6427	0.00357	0.6427	0.017	0.6427	0.02792	0.6427	0.00639	0.6427	0.02295
0.64281	-0.00739	0.64281	-0.000736371	0.64281	-0.01117	0.64449	0.04203	0.64449	0.0044	0.64449	0.0104	0.64449	0.02053	0.64449	0.02303	0.64449	0.01251	0.64449	0.02742
0.6446	-0.00717	0.6446	-0.00148	0.6446	-0.01338	0.64628	0.03751	0.64628	0.00885	0.64628	0.02248	0.64628	0.01974	0.64628	0.0215	0.64628	0.01968	0.64628	0.02695
0.64638	-0.00718	0.64638	-0.00164	0.64638	-0.01588	0.64807	0.03738	0.64807	0.01003	0.64807	0.02845	0.64807	0.01851	0.64807	0.02486	0.64807	0.03105	0.64807	0.03271
0.64817	-0.00676	0.64817	-0.00108	0.64817	-0.01573	0.64986	0.03703	0.64986	0.01285	0.64986	0.03438	0.64986	0.01797	0.64986	0.01959	0.64986	0.03747	0.64986	0.03043
0.64995	-0.00654	0.64995	-0.00115	0.64995	-0.0142	0.65165	0.03658	0.65165	0.01444	0.65165	0.03601	0.65165	0.01844	0.65165	0.01144	0.65165	0.0397	0.65165	0.02739
0.65174	-0.00672	0.65174	-0.00157	0.65174	-0.01417	0.65344	0.03522	0.65344	0.01587	0.65344	0.03764	0.65344	0.0196	0.65344	0.00762	0.65344	0.03688	0.65344	0.02561
0.65352	-0.00626	0.65352	-0.00178	0.65352	-0.01467	0.65523	0.03871	0.65523	0.01643	0.65523	0.03597	0.65523	0.02034	0.65523	0.000800203	0.65523	0.03307	0.65523	0.024
0.65531	-0.00593	0.65531	-0.00247	0.65531	-0.01306	0.65702	0.03725	0.65702	0.01217	0.65702	0.0316	0.65702	0.02031	0.65702	-0.00567	0.65702	0.03211	0.65702	0.02281
0.65709	-0.00515	0.65709	-0.0033	0.65709	-0.0124	0.65881	0.0305	0.65881	0.01411	0.65881	0.03538	0.65881	0.02107	0.65881	-0.00463	0.65881	0.03167	0.65881	0.01975
0.65888	-0.00459	0.65888	-0.00441	0.65888	-0.00981	0.6606	0.02869	0.6606	0.01501	0.6606	0.04207	0.6606	0.02603	0.6606	0.000661483	0.6606	0.03432	0.6606	0.00949
0.66066	-0.00445	0.66066	-0.00416	0.66066	-0.0072	0.66239	0.02416	0.66239	0.00996	0.66239	0.04542	0.66239	0.03294	0.66239	0.00687	0.66239	0.03809	0.66239	0.00237
0.66245	-0.00381	0.66245	-0.00326	0.66245	-0.00596	0.66418	0.02714	0.66418	0.01891	0.66418	0.05273	0.66418	0.04029	0.66418	0.01137	0.66418	0.03274	0.66418	0.000743103
0.66423	-0.00342	0.66423	-0.00288	0.66423	-0.00526	0.66597	0.03847	0.66597	0.02609	0.66597	0.05615	0.66597	0.04069	0.66597	0.01884	0.66597	0.01887	0.66597	-0.000948265
0.66602	-0.00346	0.66602	-0.00241	0.66602	-0.00458	0.66776	0.04837	0.66776	0.03072	0.66776	0.05864	0.66776	0.0464	0.66776	0.02138	0.66776	0.01578	0.66776	0.00255
0.6678	-0.0035	0.6678	-0.00152	0.6678	-0.00355	0.66955	0.05353	0.66955	0.03475	0.66955	0.0611	0.66955	0.05208	0.66955	0.0228	0.66955	0.01819	0.66955	0.00185
0.66959	-0.00332	0.66959	-0.000816026	0.66959	-0.00345	0.67134	0.05734	0.67134	0.03412	0.67134	0.05825	0.67134	0.04628	0.67134	0.0273	0.67134	0.01317	0.67134	0.0027
0.67137	-0.00286	0.67137	0.000326296	0.67137	-0.00481	0.67313	0.05944	0.67313	0.03715	0.67313	0.055	0.67313	0.03521	0.67313	0.02758	0.67313	0.01337	0.67313	0.00595
0.67316	-0.00303	0.67316	0.00134	0.67316	-0.00601	0.67492	0.05688	0.67492	0.03284	0.67492	0.04757	0.67492	0.02429	0.67492	0.03057	0.67492	0.01906	0.67492	0.00842
0.67494	-0.00348	0.67494	0.00147	0.67494	-0.00532	0.67671	0.05227	0.67671	0.02376	0.67671	0.04713	0.67671	0.0166	0.67671	0.03197	0.67671	0.03052	0.67671	0.00844
0.67673	-0.00386	0.67673	0.00127	0.67673	-0.00439	0.67849	0.04583	0.67849	0.02246	0.67849	0.04219	0.67849	0.01291	0.67849	0.0365	0.67849	0.03575	0.67849	0.01025
0.67851	-0.00387	0.67851	0.00166	0.67851	-0.00476	0.68028	0.04261	0.68028	0.0252	0.68028	0.03507	0.68028	0.00788	0.68028	0.03776	0.68028	0.03167	0.68028	0.01567
0.6803	-0.00433	0.6803	0.0017	0.6803	-0.00456	0.68207	0.04238	0.68207	0.02374	0.68207	0.03149	0.68207	0.00602	0.68207	0.03712	0.68207	0.02829	0.68207	0.0165
0.68208	-0.00443	0.68208	0.00123	0.68208	-0.00281	0.68386	0.04041	0.68386	0.02659	0.68386	0.03336	0.68386	0.01404	0.68386	0.03792	0.68386	0.02788	0.68386	0.01584
0.68387	-0.00409	0.68387	0.00111	0.68387	-0.00132	0.68565	0.03726	0.68565	0.02535	0.68565	0.03383	0.68565	0.01951	0.68565	0.0394	0.68565	0.02664	0.68565	0.01248
0.68565	-0.00419	0.68565	0.00106	0.68565	8.27899e-05	0.68744	0.03541	0.68744	0.02307	0.68744	0.0281	0.68744	0.02218	0.68744	0.04297	0.68744	0.02625	0.68744	0.01294
0.68744	-0.00466	0.68744	0.00167	0.68744	-0.000355529	0.68923	0.03361	0.68923	0.01711	0.68923	0.02832	0.68923	0.01659	0.68923	0.04268	0.68923	0.03229	0.68923	0.01234
0.68922	-0.00409	0.68922	0.000553997	0.68922	-0.000338693	0.69102	0.03187	0.69102	0.01534	0.69102	0.02793	0.69102	0.01236	0.69102	0.03833	0.69102	0.03367	0.69102	0.01226
0.69101	-0.00396	0.69101	-0.000393257	0.69101	0.000683426	0.69281	0.0312	0.69281	0.02077	0.69281	0.02283	0.69281	0.00977	0.69281	0.03142	0.69281	0.03196	0.69281	0.01622
0.69279	-0.00437	0.69279	-0.000606097	0.69279	0.000152511	0.6946	0.03183	0.6946	0.02449	0.6946	0.01581	0.6946	0.00886	0.6946	0.02608	0.6946	0.02139	0.6946	0.026
0.69458	-0.00447	0.69458	-0.000801535	0.69458	4.3421e-05	0.69639	0.03759	0.69639	0.02399	0.69639	0.01455	0.69639	0.01395	0.69639	0.01899	0.69639	0.01307	0.69639	0.03246
0.69636	-0.0043	0.69636	-0.000958412	0.69636	0.00118	0.69818	0.04294	0.69818	0.0227	0.69818	0.01733	0.69818	0.01659	0.69818	0.01684	0.69818	0.00842	0.69818	0.03069
0.69815	-0.00401	0.69815	-0.00165	0.69815	0.00213	0.69997	0.04099	0.69997	0.01943	0.69997	0.02322	0.69997	0.01718	0.69997	0.01869	0.69997	0.00224	0.69997	0.02674
0.69993	-0.00408	0.69993	-0.00191	0.69993	0.00324	0.70176	0.03706	0.70176	0.01807	0.70176	0.02856	0.70176	0.01182	0.70176	0.02024	0.70176	-0.00421	0.70176	0.0238
0.70171	-0.00418	0.70171	-0.00201	0.70171	0.00334	0.70355	0.03193	0.70355	0.01724	0.70355	0.03449	0.70355	0.01536	0.70355	0.02219	0.70355	-0.01294	0.70355	0.02518
0.7035	-0.00353	0.7035	-0.00166	0.7035	0.00299	0.70534	0.03163	0.70534	0.02049	0.70534	0.03632	0.70534	0.02294	0.70534	0.0243	0.70534	-0.0154	0.70534	0.02845
0.70528	-0.00321	0.70528	-0.00116	0.70528	0.00231	0.70713	0.03397	0.70713	0.02586	0.70713	0.03433	0.70713	0.02519	0.70713	0.02478	0.70713	-0.01605	0.70713	0.02777
0.70707	-0.00287	0.70707	-0.000828828	0.70707	0.00155	0.70892	0.03331	0.70892	0.02521	0.70892	0.03543	0.70892	0.03019	0.70892	0.02569	0.70892	-0.01511	0.70892	0.01863
0.70885	-0.0028	0.70885	-0.00131	0.70885	0.00205	0.71071	0.03227	0.71071	0.02755	0.71071	0.03709	0.71071	0.03643	0.71071	0.0284	0.71071	-0.00569	0.71071	0.01468
0.71064	-0.0027	0.71064	-0.00107	0.71064	0.00122	0.7125	0.03801	0.7125	0.03423	0.7125	0.04272	0.7125	0.04049	0.7125	0.03001	0.7125	0.00645	0.7125	0.01343
0.71242	-0.00224	0.71242	-0.000428907	0.71242	0.00109	0.71429	0.03484	0.71429	0.03501	0.71429	0.04902	0.71429	0.03592	0.71429	0.03631	0.71429	0.01103	0.71429	0.01866
0.71421	-0.00215	0.71421	0.000129904	0.71421	0.00238	0.71607	0.03069	0.71607	0.03359	0.71607	0.04993	0.71607	0.03523	0.71607	0.04433	0.71607	0.0151	0.71607	0.01838
0.71599	-0.00239	0.71599	-5.34254e-06	0.71599	0.00309	0.71786	0.03038	0.71786	0.02798	0.71786	0.05192	0.71786	0.042	0.71786	0.04621	0.71786	0.0175	0.71786	0.01224
0.71778	-0.00244	0.71778	-0.000704	0.71778	0.00294	0.71965	0.02779	0.71965	0.02021	0.71965	0.06122	0.71965	0.04229	0.71965	0.04064	0.71965	0.01435	0.71965	0.00973
0.71956	-0.00263	0.71956	-0.000864952	0.71956	0.00329	0.72144	0.02701	0.72144	0.01045	0.72144	0.05735	0.72144	0.03963	0.72144	0.03468	0.72144	0.01053	0.72144	0.00505
0.72135	-0.00278	0.72135	-0.00116	0.72135	0.00389	0.72323	0.02401	0.72323	0.00165	0.72323	0.04792	0.72323	0.03561	0.72323	0.03102	0.72323	0.00848	0.72323	0.00886
0.72313	-0.00362	0.72313	-0.00127	0.72313	0.00353	0.72502	0.02327	0.72502	2.40921e-05	0.72502	0.03525	0.72502	0.03049	0.72502	0.02749	0.72502	0.01061	0.72502	0.0191
0.72492	-0.00414	0.72492	-0.00161	0.72492	0.00184	0.72681	0.02974	0.72681	0.00143	0.72681	0.02571	0.72681	0.02192	0.72681	0.02661	0.72681	0.01215	0.72681	0.02997
0.7267	-0.00455	0.7267	-0.0017	0.7267	0.000291781	0.7286	0.03257	0.7286	-0.000155662	0.7286	0.02844	0.7286	0.01781	0.7286	0.0261	0.7286	0.01473	0.7286	0.03394
0.72849	-0.00521	0.72849	-0.00197	0.72849	0.00026415	0.73039	0.03197	0.73039	0.000572802	0.73039	0.03059	0.73039	0.01552	0.73039	0.0232	0.73039	0.01943	0.73039	0.03317
0.73027	-0.00561	0.73027	-0.00254	0.73027	0.000939272	0.73218	0.03537	0.73218	0.00619	0.73218	0.03406	0.73218	0.0151	0.73218	0.02386	0.73218	0.02528	0.73218	0.03253
0.73206	-0.00561	0.73206	-0.00319	0.73206	7.3906e-05	0.73397	0.03466	0.73397	0.00997	0.73397	0.04175	0.73397	0.01287	0.73397	0.02297	0.73397	0.03157	0.73397	0.03072
0.73384	-0.00531	0.73384	-0.00446	0.73384	-0.00095918	0.73576	0.03484	0.73576	0.00907	0.73576	0.04357	0.73576	0.01232	0.73576	0.0221	0.73576	0.03456	0.73576	0.03282
0.73563	-0.00469	0.73563	-0.00481	0.73563	2.47304e-05	0.73755	0.034	0.73755	0.00982	0.73755	0.04477	0.73755	0.00856	0.73755	0.02396	0.73755	0.03828	0.73755	0.04069
0.73741	-0.00419	0.73741	-0.0049	0.73741	0.00204	0.73934	0.03162	0.73934	0.00921	0.73934	0.04157	0.73934	0.00635	0.73934	0.02463	0.73934	0.04131	0.73934	0.04377
0.7392	-0.00373	0.7392	-0.00535	0.7392	0.00266	0.74113	0.03164	0.74113	0.0091	0.74113	0.03956	0.74113	-0.00103	0.74113	0.02834	0.74113	0.04633	0.74113	0.04679
0.74098	-0.00333	0.74098	-0.00498	0.74098	0.00308	0.74292	0.02847	0.74292	0.00634	0.74292	0.04202	0.74292	-0.00445	0.74292	0.02696	0.74292	0.04805	0.74292	0.04956
0.74276	-0.00316	0.74276	-0.00381	0.74276	0.00306	0.74471	0.0251	0.74471	0.00407	0.74471	0.04019	0.74471	0.00208	0.74471	0.02748	0.74471	0.04664	0.74471	0.0517
0.74455	-0.00339	0.74455	-0.00276	0.74455	0.00217	0.74649	0.02295	0.74649	0.00766	0.74649	0.03459	0.74649	0.00904	0.74649	0.03052	0.74649	0.04551	0.74649	0.0527
0.74633	-0.00351	0.74633	-0.00254	0.74633	0.00143	0.74828	0.0159	0.74828	0.01005	0.74828	0.02498	0.74828	0.01067	0.74828	0.03201	0.74828	0.04031	0.74828	0.04978
0.74812	-0.00366	0.74812	-0.00248	0.74812	0.000530392	0.75007	0.00907	0.75007	0.00936	0.75007	0.01742	0.75007	0.01247	0.75007	0.02929	0.75007	0.03631	0.75007	0.05515
0.7499	-0.00363	0.7499	-0.00159	0.7499	-0.00161	0.75186	0.00684	0.75186	0.0077	0.75186	0.01242	0.75186	0.02207	0.75186	0.02646	0.75186	0.03264	0.75186	0.05961
0.75169	-0.00319	0.75169	-0.00104	0.75169	-0.00254	0.75365	0.00654	0.75365	0.00424	0.75365	0.01023	0.75365	0.02929	0.75365	0.02966	0.75365	0.03126	0.75365	0.05629
0.75347	-0.00271	0.75347	-0.000652325	0.75347	-0.00152	0.75544	0.00549	0.75544	0.00537	0.75544	0.01436	0.75544	0.03491	0.75544	0.03429	0.75544	0.02645	0.75544	0.05649
0.75526	-0.00227	0.75526	-0.0003694	0.75526	-0.000465484	0.75723	0.00364	0.75723	0.00891	0.75723	0.01889	0.75723	0.03661	0.75723	0.0364	0.75723	0.02665	0.75723	0.05485
0.75704	-0.00192	0.75704	-3.78701e-05	0.75704	0.000635126	0.75902	0.00411	0.75902	0.01384	0.75902	0.02293	0.75902	0.04259	0.75902	0.03501	0.75902	0.02863	0.75902	0.04459
0.75883	-0.00154	0.75883	-0.000857337	0.75883	0.00185	0.76081	0.00162	0.76081	0.01638	0.76081	0.02129	0.76081	0.04608	0.76081	0.03748	0.76081	0.02792	0.76081	0.03598
0.76061	-0.00147	0.76061	-0.00192	0.76061	0.00232	0.7626	-0.00363	0.7626	0.01702	0.7626	0.0172	0.7626	0.04609	0.7626	0.04048	0.7626	0.02456	0.7626	0.03084
0.7624	-0.00156	0.7624	-0.00264	0.7624	0.00216	0.76439	-0.00702	0.76439	0.01756	0.76439	0.01686	0.76439	0.04453	0.76439	0.03739	0.76439	0.02233	0.76439	0.03005
0.76418	-0.00172	0.76418	-0.00334	0.76418	0.00119	0.76618	-0.00712	0.76618	0.01454	0.76618	0.02142	0.76618	0.03976	0.76618	0.03818	0.76618	0.02084	0.76618	0.03126
0.76597	-0.00154	0.76597	-0.00399	0.76597	-0.000341128	0.76797	-0.00601	0.76797	0.01425	0.76797	0.02297	0.76797	0.03577	0.76797	0.0416	0.76797	0.01634	0.76797	0.03062
0.76775	-0.00179	0.76775	-0.00366	0.76775	-0.00219	0.76976	-0.00236	0.76976	0.01447	0.76976	0.02499	0.76976	0.03574	0.76976	0.0358	0.76976	0.01546	0.76976	0.03008
0.76953	-0.00245	0.76953	-0.00346	0.76953	-0.00337	0.77155	-0.00211	0.77155	0.01481	0.77155	0.02037	0.77155	0.03599	0.77155	0.02512	0.77155	0.0204	0.77155	0.02515
0.77132	-0.00261	0.77132	-0.00286	0.77132	-0.00321	0.77333	-0.00325	0.77333	0.01503	0.77333	0.01215	0.77333	0.03551	0.77333	0.01377	0.77333	0.02842	0.77333	0.02467
0.7731	-0.00328	0.7731	-0.00263	0.7731	-0.00241	0.77512	-0.00315	0.77512	0.00717	0.77512	0.00566	0.77512	0.0326	0.77512	0.00623	0.77512	0.03003	0.77512	0.02327
0.77489	-0.00404	0.77489	-0.00219	0.77489	-0.00177	0.77691	-0.000885988	0.77691	-0.000418255	0.77691	0.00171	0.77691	0.03279	0.77691	0.000309491	0.77691	0.0265	0.77691	0.02041
0.77667	-0.00423	0.77667	-0.00129	0.77667	-0.000607018	0.7787	-0.000176761	0.7787	-0.00232	0.7787	-8.48012e-05	0.7787	0.03192	0.7787	-0.0036	0.7787	0.02902	0.7787	0.0128
0.77846	-0.00432	0.77846	-0.000859822	0.77846	0.00176	0.78049	9.72848e-05	0.78049	-0.00576	0.78049	-0.000167196	0.78049	0.02869	0.78049	0.00218	0.78049	0.02828	0.78049	0.00319
0.78024	-0.00427	0.78024	0.000159524	0.78024	0.00217	0.78228	-0.00322	0.78228	-0.01309	0.78228	0.00756	0.78228	0.02752	0.78228	0.00841	0.78228	0.02418	0.78228	0.00256
0.78203	-0.00389	0.78203	0.00106	0.78203	0.00162	0.78407	-0.0031	0.78407	-0.02138	0.78407	0.01597	0.78407	0.03175	0.78407	0.01503	0.78407	0.02325	0.78407	0.00341
0.78381	-0.0034	0.78381	0.000706379	0.78381	0.00188	0.78586	-0.00675	0.78586	-0.02515	0.78586	0.02096	0.78586	0.03481	0.78586	0.0219	0.78586	0.02936	0.78586	0.00857
0.7856	-0.00329	0.7856	-4.05175e-05	0.7856	0.00175	0.78765	-0.01004	0.78765	-0.02492	0.78765	0.02327	0.78765	0.03945	0.78765	0.02483	0.78765	0.03539	0.78765	0.01424
0.78738	-0.00363	0.78738	-0.000375273	0.78738	0.00118	0.78944	-0.00714	0.78944	-0.02949	0.78944	0.02461	0.78944	0.03916	0.78944	0.02401	0.78944	0.0297	0.78944	0.01861
0.78916	-0.00391	0.78916	-0.000940907	0.78916	0.000963593	0.79123	-0.00563	0.79123	-0.03658	0.79123	0.02033	0.79123	0.03198	0.79123	0.01989	0.79123	0.0253	0.79123	0.02192
0.79095	-0.00386	0.79095	-0.00123	0.79095	0.000846381	0.79302	-0.00451	0.79302	-0.03331	0.79302	0.01143	0.79302	0.01821	0.79302	0.01717	0.79302	0.02871	0.79302	0.02006
0.79273	-0.00376	0.79273	-0.00221	0.79273	0.00157	0.79481	-0.00509	0.79481	-0.02464	0.79481	0.00591	0.79481	0.00562	0.79481	0.00951	0.79481	0.03142	0.79481	0.02099
0.79452	-0.00378	0.79452	-0.0019	0.79452	0.00309	0.79659	-0.00697	0.79659	-0.01872	0.79659	0.00602	0.79659	-0.00736	0.79659	-0.000558802	0.79659	0.02968	0.79659	0.02073
0.7963	-0.00304	0.7963	-0.00105	0.7963	0.0043	0.79838	-0.00836	0.79838	-0.01536	0.79838	0.00689	0.79838	-0.01688	0.79838	-0.01136	0.79838	0.02702	0.79838	0.01696
0.79809	-0.00231	0.79809	-0.00146	0.79809	0.00459	0.80017	-0.01093	0.80017	-0.0064	0.80017	0.0075	0.80017	-0.01875	0.80017	-0.01515	0.80017	0.02086	0.80017	0.01003
0.79987	-0.00191	0.79987	-0.00169	0.79987	0.00561	0.80196	-0.01297	0.80196	0.0013	0.80196	0.00615	0.80196	-0.01668	0.80196	-0.01798	0.80196	0.01058	0.80196	0.00528
0.80166	-0.0021	0.80166	-0.00135	0.80166	0.00608	0.80375	-0.01392	0.80375	0.00249	0.80375	0.00783	0.80375	-0.0107	0.80375	-0.02168	0.80375	0.00551	0.80375	0.00599
0.80344	-0.00248	0.80344	-0.00145	0.80344	0.00566	0.80554	-0.01514	0.80554	0.00234	0.80554	0.00896	0.80554	-0.00397	0.80554	-0.0213	0.80554	0.00731	0.80554	0.00571
0.80523	-0.00276	0.80523	-0.00114	0.80523	0.0052	0.80733	-0.01087	0.80733	0.00152	0.80733	0.01307	0.80733	0.00109	0.80733	-0.01945	0.80733	0.00345	0.80733	0.01648
0.80701	-0.00286	0.80701	-0.00118	0.80701	0.00495	0.80912	-0.00875	0.80912	0.00291	0.80912	0.01834	0.80912	0.00594	0.80912	-0.01491	0.80912	-0.00387	0.80912	0.02215
0.80879	-0.00291	0.80879	-0.000745362	0.80879	0.00381	0.81091	-0.00876	0.81091	0.00184	0.81091	0.0179	0.81091	0.00527	0.81091	-0.00894	0.81091	-0.00786	0.81091	0.02353
0.81058	-0.00286	0.81058	-9.07105e-05	0.81058	0.00214	0.8127	-0.00871	0.8127	0.00222	0.8127	0.02116	0.8127	0.00316	0.8127	-0.00634	0.8127	0.000855249	0.8127	0.0288
0.81236	-0.00275	0.81236	-0.000168463	0.81236	-9.64868e-05	0.81449	-0.00985	0.81449	0.00743	0.81449	0.01806	0.81449	-0.000487541	0.81449	0.000370026	0.81449	0.00845	0.81449	0.03492
0.81415	-0.00269	0.81415	-3.60741e-05	0.81415	-0.00232	0.81628	-0.00609	0.81628	0.00953	0.81628	0.01384	0.81628	-0.00236	0.81628	0.00633	0.81628	0.01296	0.81628	0.03363
0.81593	-0.00245	0.81593	6.78087e-05	0.81593	-0.00346	0.81806	-0.0057	0.81806	0.00503	0.81806	0.00855	0.81806	0.00383	0.81806	0.01282	0.81806	0.02356	0.81806	0.02412
0.81772	-0.00229	0.81772	-0.000307094	0.81772	-0.00389	0.81985	-0.00353	0.81985	0.000169379	0.81985	0.00423	0.81985	0.01007	0.81985	0.01549	0.81985	0.03248	0.81985	0.01493
0.8195	-0.00208	0.8195	-9.06585e-05	0.8195	-0.00394	0.82164	0.00271	0.82164	-6.61583e-05	0.82164	0.00466	0.82164	0.01222	0.82164	0.01661	0.82164	0.03162	0.82164	0.01177
0.82129	-0.00205	0.82129	-0.000995491	0.82129	-0.00338	0.82343	0.00193	0.82343	0.00114	0.82343	0.00923	0.82343	0.00935	0.82343	0.02038	0.82343	0.02513	0.82343	0.01001
0.82307	-0.0022	0.82307	-0.00248	0.82307	-0.00204	0.82522	-0.000560529	0.82522	0.00543	0.82522	0.01698	0.82522	0.0028	0.82522	0.02055	0.82522	0.0166	0.82522	0.00481
0.82485	-0.00218	0.82485	-0.00259	0.82485	-0.00059686	0.82701	-0.00395	0.82701	0.00851	0.82701	0.02011	0.82701	0.0022	0.82701	0.01749	0.82701	0.00244	0.82701	0.00702
0.82664	-0.00235	0.82664	-0.00212	0.82664	0.000182349	0.8288	-0.00766	0.8288	0.01031	0.8288	0.02012	0.8288	0.00175	0.8288	0.01793	0.8288	-0.00885	0.8288	0.01172
0.82842	-0.00282	0.82842	-0.00118	0.82842	0.000635582	0.83059	-0.01163	0.83059	0.01185	0.83059	0.01898	0.83059	0.00778	0.83059	0.02403	0.83059	-0.01353	0.83059	0.01409
0.83021	-0.0028	0.83021	-0.000209401	0.83021	0.000933926	0.83238	-0.01408	0.83238	0.01303	0.83238	0.02124	0.83238	0.01547	0.83238	0.02659	0.83238	-0.01324	0.83238	0.01803
0.83199	-0.00241	0.83199	0.00072886	0.83199	0.00105	0.83417	-0.01123	0.83417	0.00941	0.83417	0.0234	0.83417	0.02161	0.83417	0.02511	0.83417	-0.01242	0.83417	0.02106
0.83378	-0.0023	0.83378	0.00134	0.83378	0.00139	0.83596	-0.00563	0.83596	0.00651	0.83596	0.02062	0.83596	0.02773	0.83596	0.02765	0.83596	-0.00945	0.83596	0.02406
0.83556	-0.00215	0.83556	0.00145	0.83556	0.00251	0.83774	7.22637e-06	0.83774	0.00296	0.83774	0.01805	0.83774	0.03001	0.83774	0.02875	0.83774	-0.01122	0.83774	0.02524
0.83735	-0.00234	0.83735	0.000820045	0.83735	0.00402	0.83953	0.000994365	0.83953	0.00317	0.83953	0.01742	0.83953	0.03021	0.83953	0.02553	0.83953	-0.01318	0.83953	0.02527
0.83913	-0.00246	0.83913	-0.000308628	0.83913	0.00635	0.84132	0.00159	0.84132	0.00125	0.84132	0.01623	0.84132	0.02482	0.84132	0.02405	0.84132	-0.01023	0.84132	0.0245
0.84091	-0.00252	0.84091	-0.000816026	0.84091	0.00772	0.84311	0.0017	0.84311	-0.00223	0.84311	0.01453	0.84311	0.0197	0.84311	0.02344	0.84311	-0.00497	0.84311	0.01808
0.8427	-0.00259	0.8427	-0.00158	0.8427	0.00803	0.8449	0.00455	0.8449	6.72695e-05	0.8449	0.01206	0.8449	0.01459	0.8449	0.0222	0.8449	0.00279	0.8449	0.00721
0.84448	-0.00272	0.84448	-0.00209	0.84448	0.0074	0.84669	0.00918	0.84669	0.000227938	0.84669	0.01056	0.84669	0.01012	0.84669	0.01597	0.84669	0.0028	0.84669	-0.00343
0.84627	-0.00246	0.84627	-0.00242	0.84627	0.00579	0.84848	0.00935	0.84848	-0.000188279	0.84848	0.01063	0.84848	0.00294	0.84848	0.01202	0.84848	0.000103957	0.84848	0.00274
0.84805	-0.00206	0.84805	-0.00219	0.84805	0.00454	0.85027	0.01228	0.85027	-0.00307	0.85027	0.01229	0.85027	0.00067325	0.85027	0.01149	0.85027	0.00263	0.85027	0.00876
0.84984	-0.00191	0.84984	-0.00173	0.84984	0.00408	0.85206	0.01237	0.85206	-0.00498	0.85206	0.01499	0.85206	0.00108	0.85206	0.01133	0.85206	0.00345	0.85206	0.01085
0.85162	-0.00138	0.85162	-0.00145	0.85162	0.00395	0.85385	0.01236	0.85385	-0.00575	0.85385	0.01682	0.85385	-0.000696747	0.85385	0.01098	0.85385	0.0014	0.85385	0.01386
0.8534	-0.000923594	0.8534	-0.00104	0.8534	0.00373	0.85564	0.0125	0.85564	-0.00717	0.85564	0.0096	0.85564	0.000441	0.85564	0.01268	0.85564	-0.00108	0.85564	0.01228
0.85519	-0.000466706	0.85519	-0.000432713	0.85519	0.00384	0.85742	0.01053	0.85742	-0.00426	0.85742	0.00382	0.85742	0.0068	0.85742	0.01429	0.85742	-0.000809851	0.85742	0.01214
0.85697	-0.000137706	0.85697	-0.000257163	0.85697	0.00472	0.85921	0.00433	0.85921	-0.00337	0.85921	0.00309	0.85921	0.01278	0.85921	0.01192	0.85921	0.00153	0.85921	0.01203
0.85876	-0.000196396	0.85876	0.000510412	0.85876	0.00536	0.861	0.00387	0.861	-0.00172	0.861	0.0019	0.861	0.01551	0.861	0.00737	0.861	-0.00461	0.861	0.01131
0.86054	-0.000124853	0.86054	0.000320054	0.86054	0.00482	0.86279	0.00545	0.86279	0.00152	0.86279	0.00601	0.86279	0.01686	0.86279	0.00314	0.86279	-0.00922	0.86279	0.01047
0.86233	-0.000136693	0.86233	4.55936e-05	0.86233	0.00397	0.86458	0.00351	0.86458	-0.00151	0.86458	0.00997	0.86458	0.01878	0.86458	0.000559894	0.86458	-0.00725	0.86458	0.01251
0.86411	-0.000355987	0.86411	-0.000399683	0.86411	0.00397	0.86637	0.0012	0.86637	-0.00611	0.86637	0.01053	0.86637	0.02106	0.86637	-0.00276	0.86637	-0.00498	0.86637	0.01506
0.86589	-0.000659048	0.86589	-0.00089436	0.86589	0.00315	0.86816	-0.00423	0.86816	-0.00691	0.86816	0.0106	0.86816	0.02003	0.86816	-0.000433069	0.86816	-0.000403642	0.86816	0.01554
0.86768	-0.000860778	0.86768	-0.00181	0.86768	0.000872795	0.86995	-0.01457	0.86995	-0.00826	0.86995	0.01223	0.86995	0.01223	0.86995	0.00511	0.86995	0.00539	0.86995	0.01579
0.86946	-0.000619909	0.86946	-0.00287	0.86946	0.000726619	0.87174	-0.02553	0.87174	-0.01304	0.87174	0.0146	0.87174	0.00582	0.87174	0.00879	0.87174	0.01069	0.87174	0.0156
0.87125	-0.000444039	0.87125	-0.00293	0.87125	0.00131	0.87352	-0.03234	0.87352	-0.01884	0.87352	0.01183	0.87352	0.00525	0.87352	0.01367	0.87352	0.01777	0.87352	0.0151
0.87303	-0.000795586	0.87303	-0.0025	0.87303	0.000300085	0.87531	-0.0352	0.87531	-0.01773	0.87531	0.00605	0.87531	0.00379	0.87531	0.0151	0.87531	0.02166	0.87531	0.01135
0.87482	-0.000902564	0.87482	-0.00221	0.87482	-0.000685633	0.8771	-0.03442	0.8771	-0.01378	0.8771	0.000523224	0.8771	0.00201	0.8771	0.01522	0.8771	0.02033	0.8771	0.00902
0.8766	-0.000886598	0.8766	-0.00162	0.8766	-0.00129	0.87889	-0.03064	0.87889	-0.01205	0.87889	-0.00316	0.87889	0.0033	0.87889	0.01495	0.87889	0.02214	0.87889	0.00922
0.87838	-0.00078363	0.87838	-0.000520198	0.87838	-0.00139	0.88068	-0.02709	0.88068	-0.01255	0.88068	-0.01021	0.88068	0.00962	0.88068	0.01635	0.88068	0.02234	0.88068	0.00462
0.88017	-0.00108	0.88017	0.000947545	0.88017	-0.00128	0.88247	-0.02249	0.88247	-0.01576	0.88247	-0.01571	0.88247	0.01511	0.88247	0.01771	0.88247	0.02464	0.88247	0.00465
0.88195	-0.00102	0.88195	0.00155	0.88195	-0.0025	0.88426	-0.01524	0.88426	-0.01339	0.88426	-0.01994	0.88426	0.01364	0.88426	0.01583	0.88426	0.02897	0.88426	0.00782
0.88374	-0.00104	0.88374	0.00211	0.88374	-0.00278	0.88605	-0.00712	0.88605	-0.01422	0.88605	-0.02387	0.88605	0.01197	0.88605	0.01633	0.88605	0.02983	0.88605	0.01338
0.88552	-0.00176	0.88552	0.0028	0.88552	-0.00265	0.88784	0.000120808	0.88784	-0.01537	0.88784	-0.0249	0.88784	0.01082	0.88784	0.01433	0.88784	0.02973	0.88784	0.0202
0.88731	-0.00218	0.88731	0.00319	0.88731	-0.0027	0.88962	0.00267	0.88962	-0.01333	0.88962	-0.02374	0.88962	0.01532	0.88962	0.01432	0.88962	0.03258	0.88962	0.03218
0.88909	-0.00222	0.88909	0.00338	0.88909	-0.00225	0.89141	0.00517	0.89141	-0.01089	0.89141	-0.02223	0.89141	0.01797	0.89141	0.01484	0.89141	0.02582	0.89141	0.05183
0.89087	-0.00213	0.89087	0.00323	0.89087	-0.00185	0.8932	0.00764	0.8932	-0.0068	0.8932	-0.02072	0.8932	0.02214	0.8932	0.01257	0.8932	0.02604	0.8932	0.05621
0.89266	-0.00168	0.89266	0.00316	0.89266	-0.00138	0.89499	0.00634	0.89499	-0.00322	0.89499	-0.01109	0.89499	0.02855	0.89499	0.0125	0.89499	0.02455	0.89499	0.05885
0.89444	-0.00135	0.89444	0.00332	0.89444	-0.00105	0.89678	0.0064	0.89678	-0.00115	0.89678	-0.00729	0.89678	0.03475	0.89678	0.01578	0.89678	0.02896	0.89678	0.06033
0.89623	-0.00114	0.89623	0.00225	0.89623	-0.000273956	0.89857	0.00923	0.89857	-0.00316	0.89857	-0.00367	0.89857	0.0417	0.89857	0.01838	0.89857	0.03306	0.89857	0.06183
0.89801	-0.000814901	0.89801	0.0014	0.89801	0.000940318	0.90036	0.01203	0.90036	-0.00309	0.90036	0.005	0.90036	0.04601	0.90036	0.02427	0.90036	0.03032	0.90036	0.06491
0.8998	-0.00101	0.8998	0.00158	0.8998	0.00264	0.90215	0.01488	0.90215	0.00163	0.90215	0.01365	0.90215	0.04435	0.90215	0.02757	0.90215	0.03557	0.90215	0.06029
0.90158	-0.00133	0.90158	0.00132	0.90158	0.00355	0.90394	0.0151	0.90394	0.00423	0.90394	0.01657	0.90394	0.03718	0.90394	0.02333	0.90394	0.03124	0.90394	0.05631
0.90336	-0.00171	0.90336	0.0014	0.90336	0.00387	0.90572	0.01123	0.90572	0.00242	0.90572	0.01767	0.90572	0.03295	0.90572	0.02004	0.90572	0.02531	0.90572	0.0551
0.90515	-0.00223	0.90515	0.0012	0.90515	0.00483	0.90751	0.00707	0.90751	-0.000731248	0.90751	0.01725	0.90751	0.0295	0.90751	0.01453	0.90751	0.01708	0.90751	0.05045
0.90693	-0.00241	0.90693	0.000938287	0.90693	0.00521	0.9093	0.00659	0.9093	-0.00556	0.9093	0.01278	0.9093	0.02689	0.9093	0.01582	0.9093	0.01132	0.9093	0.04739
0.90872	-0.00235	0.90872	0.000555347	0.90872	0.00535	0.91109	0.00595	0.91109	-0.0069	0.91109	0.00332	0.91109	0.02513	0.91109	0.01216	0.91109	0.00802	0.91109	0.05055
0.9105	-0.00213	0.9105	0.000237277	0.9105	0.00568	0.91288	0.00746	0.91288	-0.00727	0.91288	-0.00702	0.91288	0.02526	0.91288	0.01167	0.91288	0.00662	0.91288	0.04682
0.91228	-0.00165	0.91228	0.000542519	0.91228	0.00515	0.91467	0.00474	0.91467	-0.00864	0.91467	-0.0108	0.91467	0.02157	0.91467	0.01471	0.91467	0.00331	0.91467	0.04382
0.91407	-0.00124	0.91407	0.000729785	0.91407	0.00472	0.91646	-0.00158	0.91646	-0.00983	0.91646	-0.01542	0.91646	0.01962	0.91646	0.01755	0.91646	-0.00154	0.91646	0.04198
0.91585	-0.0011	0.91585	0.00044004	0.91585	0.00384	0.91825	-0.00547	0.91825	-0.00895	0.91825	-0.01659	0.91825	0.02397	0.91825	0.01836	0.91825	0.000156098	0.91825	0.03939
0.91764	-0.000973755	0.91764	0.000971398	0.91764	0.00356	0.92003	-0.01148	0.92003	-0.01027	0.92003	-0.01617	0.92003	0.03165	0.92003	0.01933	0.92003	0.00379	0.92003	0.03505
0.91942	-0.000942561	0.91942	0.00146	0.91942	0.00288	0.92182	-0.01232	0.92182	-0.01192	0.92182	-0.01881	0.92182	0.0337	0.92182	0.01997	0.92182	0.00563	0.92182	0.02951
0.9212	-0.000871137	0.9212	0.00107	0.9212	0.00216	0.92361	-0.01275	0.92361	-0.01386	0.92361	-0.01879	0.92361	0.03141	0.92361	0.01669	0.92361	0.00209	0.92361	0.02363
0.92299	-0.000468222	0.92299	0.000799472	0.92299	0.000897297	0.9254	-0.01361	0.9254	-0.01245	0.9254	-0.02221	0.9254	0.02781	0.9254	0.01065	0.9254	0.00362	0.9254	0.02297
0.92477	-8.24434e-05	0.92477	0.00109	0.92477	-8.16866e-05	0.92719	-0.01271	0.92719	-0.01275	0.92719	-0.02595	0.92719	0.02345	0.92719	0.00513	0.92719	0.00956	0.92719	0.0228
0.92656	0.000177622	0.92656	0.00154	0.92656	0.000114597	0.92898	-0.01031	0.92898	-0.01616	0.92898	-0.02161	0.92898	0.02006	0.92898	0.00501	0.92898	0.01538	0.92898	0.0212
0.92834	0.000252513	0.92834	0.00155	0.92834	3.11794e-05	0.93077	-0.00916	0.93077	-0.0194	0.93077	-0.01525	0.93077	0.01893	0.93077	0.0044	0.93077	0.01814	0.93077	0.02549
0.93012	8.18596e-05	0.93012	0.00136	0.93012	0.000216315	0.93256	-0.00903	0.93256	-0.02526	0.93256	-0.00823	0.93256	0.02077	0.93256	0.00755	0.93256	0.02051	0.93256	0.03125
0.93191	0.000185686	0.93191	0.0019	0.93191	0.00049265	0.93434	-0.00817	0.93434	-0.03002	0.93434	-0.000115177	0.93434	0.02502	0.93434	0.00953	0.93434	0.03007	0.93434	0.03355
0.93369	0.000234754	0.93369	0.00272	0.93369	0.00149	0.93613	-0.01068	0.93613	-0.03258	0.93613	0.00555	0.93613	0.02449	0.93613	0.01107	0.93613	0.03692	0.93613	0.03033
0.93548	3.93362e-06	0.93548	0.00296	0.93548	0.0028	0.93792	-0.0128	0.93792	-0.03081	0.93792	0.00469	0.93792	0.01948	0.93792	0.00841	0.93792	0.03336	0.93792	0.02932
0.93726	-0.000179259	0.93726	0.00377	0.93726	0.00414	0.93971	-0.01504	0.93971	-0.02864	0.93971	0.00247	0.93971	0.01526	0.93971	0.00411	0.93971	0.02894	0.93971	0.03217
0.93905	0.000209479	0.93905	0.00436	0.93905	0.00494	0.9415	-0.01162	0.9415	-0.02725	0.9415	0.00166	0.9415	0.01445	0.9415	0.00084307	0.9415	0.0271	0.9415	0.02828
0.94083	0.000270972	0.94083	0.00478	0.94083	0.00532	0.94329	-0.01131	0.94329	-0.0214	0.94329	0.00031516	0.94329	0.01598	0.94329	-0.00091693	0.94329	0.02773	0.94329	0.02467
0.94261	0.000899565	0.94261	0.0057	0.94261	0.00596	0.94508	-0.0168	0.94508	-0.01546	0.94508	-0.00444	0.94508	0.01579	0.94508	0.00152	0.94508	0.02744	0.94508	0.02131
0.9444	0.00141	0.9444	0.00575	0.9444	0.00556	0.94686	-0.01545	0.94686	-0.01233	0.94686	-0.00874	0.94686	0.01379	0.94686	0.00125	0.94686	0.02225	0.94686	0.02088
0.94618	0.00165	0.94618	0.00523	0.94618	0.00526	0.94865	-0.01257	0.94865	-0.00991	0.94865	-0.01111	0.94865	0.01217	0.94865	-0.000231487	0.94865	0.02708	0.94865	0.02009
0.94796	0.00187	0.94796	0.00495	0.94796	0.00495	0.95044	-0.01021	0.95044	-0.00627	0.95044	-0.01082	0.95044	0.01225	0.95044	-0.00272	0.95044	0.03316	0.95044	0.01848
0.94975	0.00159	0.94975	0.00452	0.94975	0.00453	0.95223	-0.00925	0.95223	-0.00363	0.95223	-0.01319	0.95223	0.01164	0.95223	-0.00207	0.95223	0.03176	0.95223	0.01578
0.95153	0.00167	0.95153	0.00446	0.95153	0.00424	0.95402	-0.00919	0.95402	-0.00768	0.95402	-0.01029	0.95402	0.00737	0.95402	-0.0019	0.95402	0.02983	0.95402	0.01306
0.95332	0.00165	0.95332	0.00477	0.95332	0.00402	0.95581	-0.00657	0.95581	-0.00957	0.95581	-0.00898	0.95581	0.00614	0.95581	-0.000413967	0.95581	0.02948	0.95581	0.01268
0.9551	0.00152	0.9551	0.00479	0.9551	0.00292	0.9576	-0.00432	0.9576	-0.00681	0.9576	-0.00834	0.9576	0.00555	0.9576	0.00307	0.9576	0.03202	0.9576	0.01124
0.95688	0.00159	0.95688	0.00446	0.95688	0.00202	0.95939	-0.00314	0.95939	-0.00181	0.95939	-0.01052	0.95939	0.01239	0.95939	0.00597	0.95939	0.03105	0.95939	0.01454
0.95867	0.00182	0.95867	0.00435	0.95867	0.00226	0.96117	0.00123	0.96117	0.00147	0.96117	-0.01671	0.96117	0.01806	0.96117	0.01019	0.96117	0.02938	0.96117	0.01863
0.96045	0.00211	0.96045	0.00452	0.96045	0.00267	0.96296	0.00296	0.96296	0.00333	0.96296	-0.02576	0.96296	0.0153	0.96296	0.01404	0.96296	0.02906	0.96296	0.02035
0.96224	0.00229	0.96224	0.00463	0.96224	0.00312	0.96475	0.00392	0.96475	0.00908	0.96475	-0.03357	0.96475	0.01738	0.96475	0.01423	0.96475	0.02472	0.96475	0.02211
0.96402	0.00252	0.96402	0.00442	0.96402	0.00339	0.96654	0.00199	0.96654	0.01405	0.96654	-0.03355	0.96654	0.01783	0.96654	0.01283	0.96654	0.0231	0.96654	0.02165
0.9658	0.00276	0.9658	0.00408	0.9658	0.00319	0.96833	-0.00103	0.96833	0.01359	0.96833	-0.03387	0.96833	0.02026	0.96833	0.00756	0.96833	0.01972	0.96833	0.02244
0.96759	0.0029	0.96759	0.00463	0.96759	0.00348	0.97012	-0.00323	0.97012	0.01351	0.97012	-0.03578	0.97012	0.02276	0.97012	0.00544	0.97012	0.01049	0.97012	0.02448
0.96937	0.00286	0.96937	0.00507	0.96937	0.00408	0.97191	-0.00597	0.97191	0.01389	0.97191	-0.03488	0.97191	0.02381	0.97191	0.000270396	0.97191	0.01204	0.97191	0.02626
0.97116	0.0028	0.97116	0.00507	0.97116	0.00405	0.97369	-0.00938	0.97369	0.00689	0.97369	-0.03079	0.97369	0.02847	0.97369	-0.00434	0.97369	0.01586	0.97369	0.0271
0.97294	0.00308	0.97294	0.00547	0.97294	0.00332	0.97548	-0.01141	0.97548	0.00183	0.97548	-0.02933	0.97548	0.03009	0.97548	-0.00389	0.97548	0.01684	0.97548	0.02413
0.97472	0.00338	0.97472	0.00594	0.97472	0.00324	0.97727	-0.01501	0.97727	-0.0028	0.97727	-0.03154	0.97727	0.02804	0.97727	-0.00185	0.97727	0.01709	0.97727	0.02338
0.97651	0.00377	0.97651	0.00642	0.97651	0.00308	0.97906	-0.01813	0.97906	-0.0056	0.97906	-0.029	0.97906	0.02669	0.97906	0.00166	0.97906	0.00956	0.97906	0.01785
0.97829	0.00423	0.97829	0.00656	0.97829	0.00292	0.98085	-0.01739	0.98085	-0.00951	0.98085	-0.02239	0.98085	0.02667	0.98085	0.00649	0.98085	0.00626	0.98085	0.0073
0.98008	0.00469	0.98008	0.0067	0.98008	0.00277	0.98264	-0.01476	0.98264	-0.0127	0.98264	-0.0192	0.98264	0.02703	0.98264	0.00652	0.98264	0.00651	0.98264	-0.00152
0.98186	0.00477	0.98186	0.00733	0.98186	0.00305	0.98442	-0.01268	0.98442	-0.01327	0.98442	-0.01704	0.98442	0.02771	0.98442	0.00353	0.98442	0.00313	0.98442	-0.00198
0.98364	0.00478	0.98364	0.00762	0.98364	0.00403	0.98621	-0.0132	0.98621	-0.01306	0.98621	-0.0151	0.98621	0.0288	0.98621	0.00271	0.98621	0.00419	0.98621	-0.00196
0.98543	0.00523	0.98543	0.00791	0.98543	0.00461	0.988	-0.01232	0.988	-0.01424	0.988	-0.01782	0.988	0.03315	0.988	0.00306	0.988	0.0045	0.988	-0.00555
0.98721	0.00604	0.98721	0.00825	0.98721	0.0049	0.98979	-0.00785	0.98979	-0.01374	0.98979	-0.01754	0.98979	0.03282	0.98979	0.00414	0.98979	0.00251	0.98979	-0.00423
0.98899	0.00715	0.98899	0.00836	0.98899	0.00493	0.99158	-0.00772	0.99158	-0.01388	0.99158	-0.01703	0.99158	0.02875	0.99158	0.00443	0.99158	0.00359	0.99158	0.00105
0.99078	0.00817	0.99078	0.00839	0.99078	0.00506	0.99337	-0.00521	0.99337	-0.01179	0.99337	-0.01526	0.99337	0.02798	0.99337	0.00339	0.99337	0.00542	0.99337	0.00679
0.99256	0.00923	0.99256	0.0081	0.99256	0.00472	0.99516	-0.0037	0.99516	-0.00847	0.99516	-0.01401	0.99516	0.0286	0.99516	0.00607	0.99516	0.01465	0.99516	0.00899
0.99435	0.00986	0.99435	0.00796	0.99435	0.00399	0.99694	-0.00522	0.99694	-0.00754	0.99694	-0.01008	0.99694	0.02682	0.99694	0.00914	0.99694	0.01895	0.99694	0.0058
0.99613	0.0099	0.99613	0.00777	0.99613	0.00287	0.99873	-0.00766	0.99873	-0.00313	0.99873	-0.00858	0.99873	0.0244	0.99873	0.01141	0.99873	0.01749	0.99873	-0.000430683
0.99791	0.00987	0.99791	0.0078	0.99791	0.00244	1.00052	-0.01201	1.00052	0.0029	1.00052	-0.0124	1.00052	0.023	1.00052	0.00979	1.00052	0.01117	1.00052	-0.00594
0.9997	0.01003	0.9997	0.00815	0.9997	0.00281	1.00231	-0.01285	1.00231	0.00665	1.00231	-0.01557	1.00231	0.02036	1.00231	0.00758	1.00231	0.00318	1.00231	-0.00861
1.00148	0.01008	1.00148	0.0087	1.00148	0.00296	1.0041	-0.01194	1.0041	0.01356	1.0041	-0.01807	1.0041	0.01754	1.0041	0.00587	1.0041	-0.00389	1.0041	-0.01103
1.00326	0.01029	1.00326	0.0093	1.00326	0.00332	1.00589	-0.01315	1.00589	0.01676	1.00589	-0.01424	1.00589	0.01386	1.00589	0.00644	1.00589	-0.01181	1.00589	-0.01343
1.00505	0.01044	1.00505	0.00995	1.00505	0.00439	1.00767	-0.01127	1.00767	0.02021	1.00767	-0.00868	1.00767	0.01125	1.00767	0.00623	1.00767	-0.01399	1.00767	-0.00504
1.00683	0.01073	1.00683	0.01065	1.00683	0.00579	1.00946	-0.00532	1.00946	0.01977	1.00946	-0.00422	1.00946	0.01402	1.00946	0.00766	1.00946	-0.01612	1.00946	0.00557
1.00862	0.01111	1.00862	0.01115	1.00862	0.0065	1.01125	-0.00237	1.01125	0.01909	1.01125	-0.00407	1.01125	0.01835	1.01125	0.00844	1.01125	-0.01755	1.01125	0.01288
1.0104	0.01165	1.0104	0.0115	1.0104	0.00703	1.01304	-0.00245	1.01304	0.01611	1.01304	-0.00357	1.01304	0.02017	1.01304	0.00736	1.01304	-0.01914	1.01304	0.0143
1.01218	0.01227	1.01218	0.01141	1.01218	0.00764	1.01483	-0.00172	1.01483	0.00984	1.01483	-0.00806	1.01483	0.02071	1.01483	0.00943	1.01483	-0.01768	1.01483	0.01031
1.01397	0.01351	1.01397	0.01133	1.01397	0.0087	1.01662	0.000746361	1.01662	0.00449	1.01662	-0.01456	1.01662	0.02208	1.01662	0.01233	1.01662	-0.01484	1.01662	0.00743
1.01575	0.01491	1.01575	0.01153	1.01575	0.00935	1.0184	-0.00019642	1.0184	0.00136	1.0184	-0.01675	1.0184	0.01796	1.0184	0.01719	1.0184	-0.01832	1.0184	-0.000647509
1.01753	0.01626	1.01753	0.01212	1.01753	0.00941	1.02019	0.000268166	1.02019	0.00142	1.02019	-0.01844	1.02019	0.01216	1.02019	0.01799	1.02019	-0.01855	1.02019	-0.00411
1.01932	0.01789	1.01932	0.01286	1.01932	0.00885	1.02198	0.00352	1.02198	2.11257e-05	1.02198	-0.01606	1.02198	0.00777	1.02198	0.01827	1.02198	-0.01664	1.02198	-0.00279
1.0211	0.01994	1.0211	0.01362	1.0211	0.00856	1.02377	0.00266	1.02377	0.00266	1.02377	-0.01552	1.02377	0.00496	1.02377	0.022	1.02377	-0.01159	1.02377	-0.000618471
1.02288	0.02245	1.02288	0.01516	1.02288	0.009	1.02556	0.00016752	1.02556	0.0062	1.02556	-0.01525	1.02556	0.000693099	1.02556	0.02377	1.02556	-0.00523	1.02556	8.03318e-05
1.02467	0.02582	1.02467	0.01691	1.02467	0.00928	1.02735	-0.00272	1.02735	0.00496	1.02735	-0.01384	1.02735	-0.00453	1.02735	0.0219	1.02735	-0.00356	1.02735	0.00471
1.02645	0.03001	1.02645	0.01851	1.02645	0.01019	1.02913	0.00172	1.02913	0.00366	1.02913	-0.01678	1.02913	-0.00633	1.02913	0.01779	1.02913	0.00702	1.02913	0.0083
1.02824	0.03533	1.02824	0.01934	1.02824	0.01101	1.03092	0.00492	1.03092	0.000582442	1.03092	-0.02112	1.03092	-0.00343	1.03092	0.01292	1.03092	0.01492	1.03092	0.01333
1.03002	0.04256	1.03002	0.02015	1.03002	0.01233	1.03271	0.00696	1.03271	-0.000219039	1.03271	-0.02315	1.03271	0.00178	1.03271	0.00539	1.03271	0.01472	1.03271	0.01909
1.0318	0.05181	1.0318	0.02088	1.0318	0.01356	1.0345	0.00988	1.0345	0.00427	1.0345	-0.02515	1.0345	0.00975	1.0345	0.000217975	1.0345	0.00721	1.0345	0.02477
1.03359	0.06486	1.03359	0.02164	1.03359	0.01446	1.03629	0.01354	1.03629	0.00634	1.03629	-0.02492	1.03629	0.0138	1.03629	-0.00261	1.03629	0.00176	1.03629	0.03216
1.03537	0.08576	1.03537	0.02289	1.03537	0.01566	1.03808	0.01516	1.03808	0.00746	1.03808	-0.02039	1.03808	0.01057	1.03808	-0.00363	1.03808	-0.00050419	1.03808	0.03486
1.03715	0.11591	1.03715	0.0244	1.03715	0.01743	1.03986	0.01122	1.03986	0.00626	1.03986	-0.02116	1.03986	0.00493	1.03986	-0.00492	1.03986	-0.00544	1.03986	0.04162
1.03894	0.15727	1.03894	0.02616	1.03894	0.01905	1.04165	0.0061	1.04165	0.0021	1.04165	-0.02075	1.04165	-0.00133	1.04165	-0.00186	1.04165	-0.00493	1.04165	0.04985
1.04072	0.21391	1.04072	0.02894	1.04072	0.02124	1.04344	0.0022	1.04344	-0.00589	1.04344	-0.01408	1.04344	-0.00324	1.04344	0.00387	1.04344	-0.00621	1.04344	0.05064
1.0425	0.29216	1.0425	0.03198	1.0425	0.02341	1.04523	0.000717629	1.04523	-0.01249	1.04523	-0.01241	1.04523	-0.00148	1.04523	0.00277	1.04523	-0.00281	1.04523	0.05305
1.04429	0.3927	1.04429	0.0353	1.04429	0.02504	1.04702	-0.00156	1.04702	-0.01159	1.04702	-0.01303	1.04702	0.00356	1.04702	0.000551777	1.04702	-0.00123	1.04702	0.05383
1.04607	0.51738	1.04607	0.03995	1.04607	0.02652	1.04881	-0.00259	1.04881	-0.00797	1.04881	-0.01499	1.04881	0.00555	1.04881	-0.00126	1.04881	0.00278	1.04881	0.0502
1.04786	0.66789	1.04786	0.04677	1.04786	0.02816	1.05059	-0.00951	1.05059	-0.00848	1.05059	-0.01454	1.05059	0.00534	1.05059	-0.00038695	1.05059	0.00874	1.05059	0.05373
1.04964	0.81846	1.04964	0.05607	1.04964	0.03036	1.05238	-0.01209	1.05238	-0.01189	1.05238	-0.00998	1.05238	0.00154	1.05238	0.000164114	1.05238	0.01049	1.05238	0.05764
1.05142	0.93557	1.05142	0.06809	1.05142	0.03311	1.05417	-0.01033	1.05417	-0.01385	1.05417	-0.0128	1.05417	-0.00519	1.05417	-0.00252	1.05417	0.01561	1.05417	0.05633
1.05321	1	1.05321	0.08412	1.05321	0.03567	1.05596	-0.00829	1.05596	-0.01438	1.05596	-0.01268	1.05596	-0.01209	1.05596	-0.00523	1.05596	0.02002	1.05596	0.0533
1.05499	0.99412	1.05499	0.10642	1.05499	0.0395	1.05775	-0.00558	1.05775	-0.01538	1.05775	-0.00869	1.05775	-0.01536	1.05775	-0.0089	1.05775	0.025	1.05775	0.05133
1.05677	0.92452	1.05677	0.13725	1.05677	0.04503	1.05953	-0.00557	1.05953	-0.01614	1.05953	-0.0105	1.05953	-0.0135	1.05953	-0.01034	1.05953	0.02375	1.05953	0.04584
1.05856	0.79808	1.05856	0.18244	1.05856	0.05237	1.06132	-0.00297	1.06132	-0.01135	1.06132	-0.01191	1.06132	-0.00784	1.06132	-0.0068	1.06132	0.01744	1.06132	0.03303
1.06034	0.64303	1.06034	0.24487	1.06034	0.06185	1.06311	0.00227	1.06311	-0.00452	1.06311	-0.01211	1.06311	-0.00416	1.06311	-0.00167	1.06311	0.01692	1.06311	0.02486
1.06212	0.49532	1.06212	0.32384	1.06212	0.07293	1.0649	-0.0011	1.0649	0.00265	1.0649	-0.01247	1.0649	-0.00262	1.0649	0.00522	1.0649	0.01488	1.0649	0.02091
1.06391	0.37083	1.06391	0.42336	1.06391	0.08742	1.06669	-0.00222	1.06669	0.01198	1.06669	-0.0146	1.06669	0.00109	1.06669	0.00766	1.06669	0.01275	1.06669	0.01481
1.06569	0.27058	1.06569	0.5421	1.06569	0.10849	1.06848	0.000343609	1.06848	0.01813	1.06848	-0.02285	1.06848	0.00404	1.06848	0.01095	1.06848	0.01446	1.06848	0.00976
1.06747	0.19672	1.06747	0.6715	1.06747	0.13452	1.07026	0.000967984	1.07026	0.02308	1.07026	-0.02569	1.07026	0.00509	1.07026	0.01397	1.07026	0.02003	1.07026	0.0111
1.06926	0.14413	1.06926	0.80173	1.06926	0.16856	1.07205	0.001	1.07205	0.02296	1.07205	-0.02262	1.07205	0.000512409	1.07205	0.01447	1.07205	0.02447	1.07205	0.01988
1.07104	0.10534	1.07104	0.91421	1.07104	0.22367	1.07384	0.00249	1.07384	0.0229	1.07384	-0.02232	1.07384	-0.00456	1.07384	0.01592	1.07384	0.02278	1.07384	0.02405
1.07282	0.07786	1.07282	0.98593	1.07282	0.29168	1.07563	0.00567	1.07563	0.01885	1.07563	-0.01759	1.07563	-0.0074	1.07563	0.01905	1.07563	0.02019	1.07563	0.02719
1.07461	0.05968	1.07461	1	1.07461	0.37175	1.07742	0.01034	1.07742	0.01258	1.07742	-0.01207	1.07742	-0.01375	1.07742	0.02042	1.07742	0.0163	1.07742	0.02945
1.07639	0.04679	1.07639	0.95311	1.07639	0.47562	1.0792	0.01689	1.0792	0.01407	1.0792	-0.0089	1.0792	-0.01416	1.0792	0.01934	1.0792	0.00938	1.0792	0.03042
1.07817	0.03756	1.07817	0.85412	1.07817	0.59292	1.08099	0.02286	1.08099	0.01694	1.08099	-0.00619	1.08099	-0.00855	1.08099	0.02002	1.08099	0.0043	1.08099	0.03081
1.07996	0.03079	1.07996	0.73015	1.07996	0.71157	1.08278	0.02589	1.08278	0.02232	1.08278	-0.00378	1.08278	-0.0029	1.08278	0.02355	1.08278	0.00497	1.08278	0.03128
1.08174	0.02569	1.08174	0.59167	1.08174	0.83232	1.08457	0.02603	1.08457	0.02501	1.08457	-0.00166	1.08457	0.00577	1.08457	0.02509	1.08457	0.00656	1.08457	0.035
1.08352	0.02189	1.08352	0.45808	1.08352	0.93617	1.08636	0.02641	1.08636	0.02861	1.08636	-0.00244	1.08636	0.00857	1.08636	0.02364	1.08636	0.00792	1.08636	0.03538
1.08531	0.01909	1.08531	0.34729	1.08531	0.9939	1.08814	0.02446	1.08814	0.03436	1.08814	-0.00203	1.08814	0.01464	1.08814	0.0227	1.08814	0.01067	1.08814	0.03653
1.08709	0.01694	1.08709	0.25952	1.08709	1	1.08993	0.01754	1.08993	0.03363	1.08993	-0.00275	1.08993	0.01734	1.08993	0.01922	1.08993	0.01131	1.08993	0.03463
1.08887	0.01541	1.08887	0.19376	1.08887	0.94821	1.09172	0.01469	1.09172	0.03365	1.09172	-0.00297	1.09172	0.01515	1.09172	0.01591	1.09172	0.00753	1.09172	0.02998
1.09066	0.0141	1.09066	0.14573	1.09066	0.86085	1.09351	0.01435	1.09351	0.03491	1.09351	-0.00143	1.09351	0.01961	1.09351	0.01246	1.09351	0.00214	1.09351	0.0276
1.09244	0.01294	1.09244	0.11113	1.09244	0.74954	1.0953	0.01633	1.0953	0.03349	1.0953	0.00107	1.0953	0.02515	1.0953	0.00762	1.0953	0.000848516	1.0953	0.0293
1.09422	0.01195	1.09422	0.08598	1.09422	0.60911	1.09708	0.01788	1.09708	0.0312	1.09708	0.00921	1.09708	0.02426	1.09708	0.00625	1.09708	-0.00402	1.09708	0.03138
1.09601	0.0108	1.09601	0.06716	1.09601	0.48317	1.09887	0.02353	1.09887	0.02765	1.09887	0.01143	1.09887	0.02542	1.09887	0.00887	1.09887	-0.00975	1.09887	0.03401
1.09779	0.00974	1.09779	0.05407	1.09779	0.37826	1.10066	0.03415	1.10066	0.02421	1.10066	0.01322	1.10066	0.03304	1.10066	0.01389	1.10066	-0.00777	1.10066	0.03718
1.09957	0.00885	1.09957	0.04427	1.09957	0.28882	1.10245	0.0432	1.10245	0.02181	1.10245	0.01297	1.10245	0.03978	1.10245	0.01504	1.10245	-0.000989935	1.10245	0.03917
1.10136	0.00834	1.10136	0.03706	1.10136	0.22011	1.10424	0.05422	1.10424	0.01972	1.10424	0.01014	1.10424	0.04544	1.10424	0.01486	1.10424	0.00432	1.10424	0.03939
1.10314	0.00802	1.10314	0.03152	1.10314	0.16939	1.10602	0.06851	1.10602	0.02494	1.10602	0.00884	1.10602	0.04636	1.10602	0.01418	1.10602	0.01038	1.10602	0.03541
1.10492	0.00753	1.10492	0.02675	1.10492	0.12962	1.10781	0.09605	1.10781	0.0346	1.10781	0.0067	1.10781	0.04034	1.10781	0.01624	1.10781	0.01616	1.10781	0.0348
1.10671	0.00679	1.10671	0.0229	1.10671	0.09868	1.1096	0.13434	1.1096	0.04876	1.1096	0.00618	1.1096	0.0336	1.1096	0.02204	1.1096	0.01747	1.1096	0.0416
1.10849	0.00627	1.10849	0.02001	1.10849	0.07796	1.11139	0.18374	1.11139	0.06398	1.11139	0.00443	1.11139	0.02546	1.11139	0.0283	1.11139	0.00981	1.11139	0.03912
1.11027	0.00571	1.11027	0.01804	1.11027	0.06313	1.11318	0.26271	1.11318	0.07713	1.11318	0.00562	1.11318	0.01939	1.11318	0.03338	1.11318	0.00227	1.11318	0.03579
1.11206	0.00485	1.11206	0.01654	1.11206	0.05193	1.11496	0.36226	1.11496	0.09831	1.11496	0.00962	1.11496	0.01656	1.11496	0.03616	1.11496	0.00275	1.11496	0.03386
1.11384	0.00431	1.11384	0.01517	1.11384	0.04455	1.11675	0.47772	1.11675	0.12802	1.11675	0.01753	1.11675	0.01927	1.11675	0.03968	1.11675	0.00712	1.11675	0.02512
1.11562	0.00396	1.11562	0.0142	1.11562	0.03947	1.11854	0.61823	1.11854	0.16235	1.11854	0.02811	1.11854	0.02704	1.11854	0.04533	1.11854	0.01153	1.11854	0.01399
1.11741	0.00369	1.11741	0.01341	1.11741	0.03481	1.12033	0.75926	1.12033	0.22177	1.12033	0.03801	1.12033	0.03345	1.12033	0.04643	1.12033	0.01367	1.12033	0.01007
1.11919	0.00361	1.11919	0.01256	1.11919	0.03165	1.12212	0.87891	1.12212	0.30793	1.12212	0.04917	1.12212	0.03643	1.12212	0.04223	1.12212	0.01678	1.12212	0.00695
1.12097	0.00369	1.12097	0.01203	1.12097	0.02902	1.1239	0.96978	1.1239	0.4043	1.1239	0.06436	1.1239	0.0388	1.1239	0.03695	1.1239	0.01595	1.1239	0.00943
1.12276	0.00383	1.12276	0.0118	1.12276	0.02657	1.12569	1	1.12569	0.52189	1.12569	0.0854	1.12569	0.041	1.12569	0.03362	1.12569	0.01603	1.12569	0.01472
1.12454	0.00384	1.12454	0.01171	1.12454	0.02432	1.12748	0.97416	1.12748	0.65853	1.12748	0.11247	1.12748	0.03806	1.12748	0.03491	1.12748	0.01276	1.12748	0.02009
1.12632	0.00364	1.12632	0.01174	1.12632	0.02211	1.12927	0.89928	1.12927	0.78163	1.12927	0.15307	1.12927	0.03481	1.12927	0.03589	1.12927	0.00657	1.12927	0.02591
1.12811	0.00352	1.12811	0.01126	1.12811	0.02052	1.13105	0.79173	1.13105	0.88946	1.13105	0.20933	1.13105	0.03496	1.13105	0.03188	1.13105	0.00407	1.13105	0.02824
1.12989	0.00324	1.12989	0.0111	1.12989	0.01913	1.13284	0.6771	1.13284	0.97058	1.13284	0.2715	1.13284	0.03937	1.13284	0.0273	1.13284	0.00113	1.13284	0.02747
1.13167	0.00305	1.13167	0.01072	1.13167	0.01781	1.13463	0.55336	1.13463	1	1.13463	0.36435	1.13463	0.04074	1.13463	0.02325	1.13463	-0.00192	1.13463	0.02566
1.13346	0.00289	1.13346	0.00989	1.13346	0.01647	1.13642	0.43856	1.13642	0.97272	1.13642	0.48861	1.13642	0.0424	1.13642	0.02009	1.13642	-0.00554	1.13642	0.02688
1.13524	0.00274	1.13524	0.00906	1.13524	0.01587	1.13821	0.34595	1.13821	0.8996	1.13821	0.61286	1.13821	0.0458	1.13821	0.02035	1.13821	-0.00357	1.13821	0.0285
1.13702	0.00246	1.13702	0.00827	1.13702	0.01575	1.13999	0.26945	1.13999	0.80699	1.13999	0.75371	1.13999	0.05077	1.13999	0.02199	1.13999	0.00495	1.13999	0.03278
1.13881	0.00227	1.13881	0.00766	1.13881	0.01527	1.14178	0.20516	1.14178	0.7038	1.14178	0.87945	1.14178	0.05665	1.14178	0.02426	1.14178	0.00917	1.14178	0.03275
1.14059	0.00233	1.14059	0.00732	1.14059	0.0148	1.14357	0.15945	1.14357	0.57726	1.14357	0.95956	1.14357	0.06542	1.14357	0.02723	1.14357	0.0101	1.14357	0.03112
1.14237	0.00257	1.14237	0.0064	1.14237	0.0144	1.14536	0.12412	1.14536	0.46411	1.14536	1	1.14536	0.07656	1.14536	0.03367	1.14536	0.01612	1.14536	0.02944
1.14415	0.00259	1.14415	0.00562	1.14415	0.01468	1.14714	0.09148	1.14714	0.37625	1.14714	0.98642	1.14714	0.09512	1.14714	0.04436	1.14714	0.02017	1.14714	0.02745
1.14594	0.00255	1.14594	0.0052	1.14594	0.01487	1.14893	0.07234	1.14893	0.29233	1.14893	0.92995	1.14893	0.12396	1.14893	0.054	1.14893	0.01865	1.14893	0.02533
1.14772	0.00248	1.14772	0.0049	1.14772	0.01479	1.15072	0.05601	1.15072	0.22693	1.15072	0.83508	1.15072	0.15476	1.15072	0.06127	1.15072	0.02308	1.15072	0.02731
1.1495	0.00235	1.1495	0.00447	1.1495	0.01451	1.15251	0.04176	1.15251	0.18142	1.15251	0.71322	1.15251	0.19901	1.15251	0.06745	1.15251	0.02977	1.15251	0.03305
1.15129	0.0022	1.15129	0.00441	1.15129	0.01413	1.1543	0.02981	1.1543	0.1367	1.1543	0.59972	1.1543	0.25866	1.1543	0.0741	1.1543	0.03743	1.1543	0.03805
1.15307	0.00227	1.15307	0.00501	1.15307	0.01322	1.15608	0.02221	1.15608	0.10086	1.15608	0.49423	1.15608	0.33152	1.15608	0.08618	1.15608	0.04372	1.15608	0.04859
1.15485	0.0025	1.15485	0.00547	1.15485	0.01232	1.15787	0.01407	1.15787	0.07414	1.15787	0.38845	1.15787	0.42025	1.15787	0.10591	1.15787	0.05151	1.15787	0.05826
1.15664	0.00282	1.15664	0.0055	1.15664	0.01144	1.15966	0.00819	1.15966	0.05115	1.15966	0.30483	1.15966	0.526	1.15966	0.13079	1.15966	0.06347	1.15966	0.06621
1.15842	0.00304	1.15842	0.00505	1.15842	0.0104	1.16145	0.00646	1.16145	0.03348	1.16145	0.24007	1.16145	0.64119	1.16145	0.16298	1.16145	0.06854	1.16145	0.07071
1.1602	0.00321	1.1602	0.00494	1.1602	0.00948	1.16323	0.00595	1.16323	0.02503	1.16323	0.18758	1.16323	0.76011	1.16323	0.20663	1.16323	0.07316	1.16323	0.07004
1.16198	0.0033	1.16198	0.00508	1.16198	0.0088	1.16502	0.00569	1.16502	0.01791	1.16502	0.15434	1.16502	0.87389	1.16502	0.26593	1.16502	0.08143	1.16502	0.072
1.16377	0.00327	1.16377	0.00488	1.16377	0.00838	1.16681	0.00312	1.16681	0.01208	1.16681	0.12836	1.16681	0.95761	1.16681	0.33725	1.16681	0.09196	1.16681	0.07435
1.16555	0.00301	1.16555	0.00472	1.16555	0.00817	1.1686	0.000371331	1.1686	0.0101	1.1686	0.09934	1.1686	1	1.1686	0.43063	1.1686	0.11095	1.1686	0.07387
1.16733	0.00255	1.16733	0.00506	1.16733	0.00807	1.17038	-0.000970001	1.17038	0.01013	1.17038	0.07708	1.17038	0.99672	1.17038	0.53526	1.17038	0.1433	1.17038	0.07196
1.16912	0.00176	1.16912	0.00587	1.16912	0.00819	1.17217	2.85751e-06	1.17217	0.01043	1.17217	0.06041	1.17217	0.95534	1.17217	0.64736	1.17217	0.19065	1.17217	0.07336
1.1709	0.00149	1.1709	0.00628	1.1709	0.0083	1.17396	0.00102	1.17396	0.00944	1.17396	0.04543	1.17396	0.88064	1.17396	0.76283	1.17396	0.25136	1.17396	0.08519
1.17268	0.00157	1.17268	0.00608	1.17268	0.00811	1.17575	0.000907161	1.17575	0.0095	1.17575	0.03103	1.17575	0.7686	1.17575	0.8646	1.17575	0.3236	1.17575	0.10488
1.17447	0.00137	1.17447	0.00623	1.17447	0.00831	1.17753	0.00411	1.17753	0.0104	1.17753	0.01759	1.17753	0.65325	1.17753	0.93708	1.17753	0.40186	1.17753	0.12826
1.17625	0.00125	1.17625	0.00606	1.17625	0.00796	1.17932	0.00922	1.17932	0.01081	1.17932	0.01158	1.17932	0.53919	1.17932	0.97553	1.17932	0.48824	1.17932	0.16118
1.17803	0.00127	1.17803	0.00562	1.17803	0.00776	1.18111	0.01331	1.18111	0.01159	1.18111	0.00643	1.18111	0.4323	1.18111	0.97208	1.18111	0.58858	1.18111	0.20982
1.17981	0.00131	1.17981	0.00502	1.17981	0.00768	1.1829	0.01383	1.1829	0.01301	1.1829	0.00632	1.1829	0.34719	1.1829	0.93249	1.1829	0.70304	1.1829	0.27372
1.1816	0.000962967	1.1816	0.00469	1.1816	0.00709	1.18469	0.01363	1.18469	0.01693	1.18469	0.00668	1.18469	0.27558	1.18469	0.85685	1.18469	0.81075	1.18469	0.34625
1.18338	0.00061987	1.18338	0.00455	1.18338	0.0072	1.18647	0.01385	1.18647	0.01757	1.18647	0.00446	1.18647	0.22189	1.18647	0.7562	1.18647	0.89533	1.18647	0.42691
1.18516	0.000304152	1.18516	0.00397	1.18516	0.0074	1.18826	0.00978	1.18826	0.017	1.18826	0.0043	1.18826	0.17907	1.18826	0.6515	1.18826	0.94966	1.18826	0.52481
1.18695	0.000225738	1.18695	0.004	1.18695	0.00784	1.19005	0.00396	1.19005	0.01511	1.19005	0.00372	1.19005	0.14023	1.19005	0.54497	1.19005	0.95905	1.19005	0.63322
1.18873	0.000193044	1.18873	0.00395	1.18873	0.00789	1.19184	0.000142149	1.19184	0.01309	1.19184	-0.00152	1.19184	0.11329	1.19184	0.44242	1.19184	0.92269	1.19184	0.73664
1.19051	0.000135603	1.19051	0.0036	1.19051	0.00756	1.19362	-0.00218	1.19362	0.01239	1.19362	-0.00951	1.19362	0.09397	1.19362	0.3587	1.19362	0.85523	1.19362	0.82187
1.19229	0.000359823	1.19229	0.00308	1.19229	0.00745	1.19541	-0.00312	1.19541	0.01233	1.19541	-0.01658	1.19541	0.07831	1.19541	0.29127	1.19541	0.75904	1.19541	0.87652
1.19408	0.000597225	1.19408	0.00237	1.19408	0.00739	1.1972	-0.00169	1.1972	0.01486	1.1972	-0.02483	1.1972	0.06465	1.1972	0.23383	1.1972	0.65635	1.1972	0.89708
1.19586	0.00101	1.19586	0.00187	1.19586	0.00721	1.19899	-0.000544061	1.19899	0.01677	1.19899	-0.02791	1.19899	0.05657	1.19899	0.19361	1.19899	0.55954	1.19899	0.87577
1.19764	0.00177	1.19764	0.00153	1.19764	0.00715	1.20077	-0.00291	1.20077	0.01715	1.20077	-0.0312	1.20077	0.04697	1.20077	0.16066	1.20077	0.47017	1.20077	0.81641
1.19943	0.00228	1.19943	0.00132	1.19943	0.00695	1.20256	-0.00621	1.20256	0.0177	1.20256	-0.03046	1.20256	0.03781	1.20256	0.13421	1.20256	0.39156	1.20256	0.73932
1.20121	0.00293	1.20121	0.00176	1.20121	0.00665	1.20435	-0.00698	1.20435	0.01533	1.20435	-0.02632	1.20435	0.03141	1.20435	0.11577	1.20435	0.3223	1.20435	0.64811
1.20299	0.00341	1.20299	0.0021	1.20299	0.00615	1.20614	-0.00688	1.20614	0.01463	1.20614	-0.02464	1.20614	0.02874	1.20614	0.10072	1.20614	0.26501	1.20614	0.55664
1.20477	0.0034	1.20477	0.00261	1.20477	0.00568	1.20792	-0.00806	1.20792	0.01677	1.20792	-0.02071	1.20792	0.03064	1.20792	0.08882	1.20792	0.21691	1.20792	0.47367
1.20656	0.00327	1.20656	0.00291	1.20656	0.00504	1.20971	-0.00615	1.20971	0.01429	1.20971	-0.01697	1.20971	0.02764	1.20971	0.07874	1.20971	0.17621	1.20971	0.39978
1.20834	0.00295	1.20834	0.00317	1.20834	0.00517	1.2115	-0.00314	1.2115	0.00995	1.2115	-0.01503	1.2115	0.02777	1.2115	0.06894	1.2115	0.14357	1.2115	0.33214
1.21012	0.00268	1.21012	0.00309	1.21012	0.00568	1.21329	-0.00277	1.21329	0.00674	1.21329	-0.01618	1.21329	0.02578	1.21329	0.06002	1.21329	0.1202	1.21329	0.27301
1.21191	0.00246	1.21191	0.00269	1.21191	0.0063	1.21507	-0.00384	1.21507	0.0031	1.21507	-0.01704	1.21507	0.02059	1.21507	0.05333	1.21507	0.10062	1.21507	0.2244
1.21369	0.00211	1.21369	0.00245	1.21369	0.00708	1.21686	-0.00409	1.21686	-0.00118	1.21686	-0.01892	1.21686	0.01959	1.21686	0.04931	1.21686	0.08172	1.21686	0.18842
1.21547	0.00186	1.21547	0.00214	1.21547	0.00807	1.21865	-0.00273	1.21865	-0.0036	1.21865	-0.01871	1.21865	0.01748	1.21865	0.04007	1.21865	0.0675	1.21865	0.16277
1.21725	0.00138	1.21725	0.00193	1.21725	0.00847	1.22043	-0.00327	1.22043	-0.0063	1.22043	-0.01748	1.22043	0.01832	1.22043	0.03351	1.22043	0.05697	1.22043	0.14063
1.21904	0.0009079	1.21904	0.00176	1.21904	0.0087	1.22222	-0.0064	1.22222	-0.0053	1.22222	-0.0135	1.22222	0.02027	1.22222	0.03286	1.22222	0.04648	1.22222	0.12461
1.22082	0.000491922	1.22082	0.00206	1.22082	0.00862	1.22401	-0.00764	1.22401	-0.00506	1.22401	-0.01025	1.22401	0.01967	1.22401	0.03078	1.22401	0.04038	1.22401	0.1065
1.2226	5.61171e-05	1.2226	0.00246	1.2226	0.0085	1.2258	-0.0052	1.2258	-0.00236	1.2258	-0.01414	1.2258	0.01837	1.2258	0.02949	1.2258	0.03503	1.2258	0.08685
1.22438	0.000111204	1.22438	0.00314	1.22438	0.0081	1.22758	-0.00379	1.22758	0.00208	1.22758	-0.01606	1.22758	0.02115	1.22758	0.03012	1.22758	0.0323	1.22758	0.07372
1.22617	0.00043292	1.22617	0.00355	1.22617	0.00724	1.22937	-0.00208	1.22937	0.00235	1.22937	-0.01535	1.22937	0.02371	1.22937	0.03237	1.22937	0.03613	1.22937	0.06194
1.22795	0.000572961	1.22795	0.00355	1.22795	0.00627	1.23116	-0.000105433	1.23116	0.00405	1.23116	-0.01435	1.23116	0.02303	1.23116	0.03083	1.23116	0.03625	1.23116	0.05552
1.22973	0.000696181	1.22973	0.00359	1.22973	0.0056	1.23295	0.000976052	1.23295	0.00551	1.23295	-0.01642	1.23295	0.01938	1.23295	0.02483	1.23295	0.03694	1.23295	0.05209
1.23152	0.000930001	1.23152	0.00347	1.23152	0.00512	1.23473	0.00138	1.23473	0.00343	1.23473	-0.0163	1.23473	0.02125	1.23473	0.02194	1.23473	0.03708	1.23473	0.04982
1.2333	0.00114	1.2333	0.00318	1.2333	0.00487	1.23652	0.00179	1.23652	-0.000179939	1.23652	-0.01188	1.23652	0.02384	1.23652	0.02245	1.23652	0.0403	1.23652	0.04558
1.23508	0.0012	1.23508	0.00271	1.23508	0.00511	1.23831	0.00051768	1.23831	-0.00476	1.23831	-0.01096	1.23831	0.02104	1.23831	0.02215	1.23831	0.04734	1.23831	0.04444
1.23686	0.00113	1.23686	0.00232	1.23686	0.00551	1.2401	0.000924887	1.2401	-0.00582	1.2401	-0.0115	1.2401	0.02378	1.2401	0.01989	1.2401	0.04403	1.2401	0.04524
1.23865	0.00119	1.23865	0.00206	1.23865	0.00605	1.24188	0.00126	1.24188	-0.00451	1.24188	-0.00813	1.24188	0.02741	1.24188	0.02038	1.24188	0.04085	1.24188	0.04285
1.24043	0.00122	1.24043	0.00191	1.24043	0.0067	1.24367	0.00281	1.24367	-0.00642	1.24367	-0.00104	1.24367	0.02828	1.24367	0.02274	1.24367	0.03761	1.24367	0.04331
1.24221	0.000938626	1.24221	0.00231	1.24221	0.00681	1.24546	0.00307	1.24546	-0.0084	1.24546	-8.54529e-05	1.24546	0.02161	1.24546	0.02406	1.24546	0.03668	1.24546	0.04547
1.24399	0.000803297	1.24399	0.00261	1.24399	0.00709	1.24724	0.00154	1.24724	-0.00644	1.24724	-0.00701	1.24724	0.01823	1.24724	0.02221	1.24724	0.03596	1.24724	0.04836
1.24578	0.000610934	1.24578	0.00286	1.24578	0.00759	1.24903	0.00361	1.24903	-0.00373	1.24903	-0.00774	1.24903	0.01612	1.24903	0.02132	1.24903	0.02747	1.24903	0.04773
1.24756	0.000272219	1.24756	0.00296	1.24756	0.00803	1.25082	0.0078	1.25082	-0.00232	1.25082	-0.00412	1.25082	0.00896	1.25082	0.02109	1.25082	0.02316	1.25082	0.04358
1.24934	-5.44438e-05	1.24934	0.00296	1.24934	0.00827	1.25261	0.01119	1.25261	-0.00248	1.25261	-0.00435	1.25261	-0.00026191	1.25261	0.01505	1.25261	0.01855	1.25261	0.04009
1.25112	4.14737e-06	1.25112	0.00331	1.25112	0.00818	1.25439	0.01168	1.25439	-0.0025	1.25439	-0.00251	1.25439	-0.00883	1.25439	0.012	1.25439	0.01105	1.25439	0.03977
1.25291	0.000308864	1.25291	0.00317	1.25291	0.00795	1.25618	0.00983	1.25618	-0.00396	1.25618	0.000777187	1.25618	-0.00481	1.25618	0.00956	1.25618	0.00833	1.25618	0.03677
1.25469	0.000518694	1.25469	0.00281	1.25469	0.0077	1.25797	0.00358	1.25797	-0.00382	1.25797	0.000494373	1.25797	-0.00151	1.25797	0.00839	1.25797	0.00805	1.25797	0.03364
1.25647	0.000656886	1.25647	0.00255	1.25647	0.00691	1.25975	-0.000988484	1.25975	-0.000456984	1.25975	-0.000897392	1.25975	-0.00188	1.25975	0.00575	1.25975	0.01048	1.25975	0.02807
1.25825	0.000736371	1.25825	0.00263	1.25825	0.00659	1.26154	-0.00352	1.26154	0.000175676	1.26154	0.000394933	1.26154	-0.00174	1.26154	0.00635	1.26154	0.0115	1.26154	0.02231
1.26004	0.000873103	1.26004	0.00254	1.26004	0.00664	1.26333	-0.0061	1.26333	-0.000315589	1.26333	0.00583	1.26333	0.00373	1.26333	0.00818	1.26333	0.01326	1.26333	0.02265
1.26182	0.000875051	1.26182	0.00214	1.26182	0.00646	1.26512	-0.01005	1.26512	-0.000837247	1.26512	0.01164	1.26512	0.00926	1.26512	0.00801	1.26512	0.01652	1.26512	0.02307
1.2636	0.000820918	1.2636	0.00203	1.2636	0.00609	1.2669	-0.01312	1.2669	-0.00030169	1.2669	0.01441	1.2669	0.00888	1.2669	0.00933	1.2669	0.01753	1.2669	0.02198
1.26538	0.000539763	1.26538	0.00242	1.26538	0.00524	1.26869	-0.0116	1.26869	-0.000939354	1.26869	0.01769	1.26869	0.01065	1.26869	0.0096	1.26869	0.0213	1.26869	0.01959
1.26717	0.000184652	1.26717	0.00209	1.26717	0.00412	1.27048	-0.00827	1.27048	-0.000665645	1.27048	0.02089	1.27048	0.0157	1.27048	0.00734	1.27048	0.02007	1.27048	0.01571
1.26895	-0.000216877	1.26895	0.00154	1.26895	0.00367	1.27226	-0.00667	1.27226	-0.000590965	1.27226	0.0207	1.27226	0.01215	1.27226	0.00701	1.27226	0.01545	1.27226	0.01697
1.27073	-0.000449763	1.27073	0.0012	1.27073	0.00341	1.27405	-0.00663	1.27405	0.00202	1.27405	0.0169	1.27405	0.00112	1.27405	0.00887	1.27405	0.00898	1.27405	0.01297
1.27251	-0.000301737	1.27251	0.00107	1.27251	0.00337	1.27584	-0.00503	1.27584	0.00115	1.27584	0.01013	1.27584	-0.00241	1.27584	0.00747	1.27584	0.00398	1.27584	0.00474
1.2743	-3.11755e-05	1.2743	0.0011	1.2743	0.00348	1.27763	-0.00449	1.27763	-0.0036	1.27763	0.00155	1.27763	-0.00155	1.27763	0.00556	1.27763	0.00536	1.27763	0.00422
1.27608	0.000210376	1.27608	0.00114	1.27608	0.00398	1.27941	-0.00595	1.27941	-0.00241	1.27941	-0.0058	1.27941	-0.00289	1.27941	0.01148	1.27941	0.00168	1.27941	0.00613
1.27786	0.000251189	1.27786	0.00134	1.27786	0.00461	1.2812	-0.00645	1.2812	-0.00599	1.2812	-0.01038	1.2812	-0.00437	1.2812	0.01994	1.2812	-0.00383	1.2812	0.00644
1.27964	0.000184009	1.27964	0.00157	1.27964	0.00455	1.28299	-0.00628	1.28299	-0.00619	1.28299	-0.01395	1.28299	-0.0093	1.28299	0.02629	1.28299	-0.00723	1.28299	0.0057
1.28143	0.000218787	1.28143	0.00171	1.28143	0.00441	1.28477	-0.00423	1.28477	-0.00424	1.28477	-0.01758	1.28477	-0.01023	1.28477	0.02765	1.28477	-0.00222	1.28477	0.00515
1.28321	0.000267719	1.28321	0.00193	1.28321	0.00428	1.28656	-0.00557	1.28656	-0.00191	1.28656	-0.02064	1.28656	-0.01554	1.28656	0.02671	1.28656	0.00595	1.28656	0.00767
1.28499	0.000164791	1.28499	0.00202	1.28499	0.00416	1.28835	-0.01024	1.28835	0.00346	1.28835	-0.01849	1.28835	-0.01942	1.28835	0.02474	1.28835	0.00888	1.28835	0.00891
1.28677	5.31007e-05	1.28677	0.00188	1.28677	0.00437	1.29014	-0.01181	1.29014	0.00228	1.29014	-0.01401	1.29014	-0.02368	1.29014	0.02398	1.29014	0.01016	1.29014	0.00899
1.28856	2.25681e-05	1.28856	0.00162	1.28856	0.00443	1.29192	-0.00853	1.29192	-0.000557054	1.29192	-0.00705	1.29192	-0.02663	1.29192	0.02064	1.29192	0.01563	1.29192	0.01285
1.29034	-9.53896e-07	1.29034	0.00112	1.29034	0.0044	1.29371	-0.00351	1.29371	-0.00301	1.29371	-0.00415	1.29371	-0.02802	1.29371	0.02002	1.29371	0.01756	1.29371	0.00833
1.29212	2.05231e-05	1.29212	0.000598876	1.29212	0.00373	1.2955	0.000319835	1.2955	-0.006	1.2955	-0.00213	1.2955	-0.02659	1.2955	0.02149	1.2955	0.01511	1.2955	0.00271
1.2939	-0.000114416	1.2939	0.000166903	1.2939	0.00356	1.29728	0.00129	1.29728	-0.00292	1.29728	0.00194	1.29728	-0.02127	1.29728	0.02186	1.29728	0.01631	1.29728	2.50097e-05
1.29568	-0.000117999	1.29568	-6.75964e-05	1.29568	0.00351	1.29907	0.00447	1.29907	0.00242	1.29907	0.00289	1.29907	-0.01491	1.29907	0.02282	1.29907	0.01996	1.29907	0.00146
1.29747	0.000103064	1.29747	8.21681e-05	1.29747	0.00371	1.30086	0.00714	1.30086	0.00286	1.30086	0.00146	1.30086	-0.00949	1.30086	0.02311	1.30086	0.02573	1.30086	-0.000101522
1.29925	0.000422912	1.29925	0.000344542	1.29925	0.00372	1.30264	0.00878	1.30264	0.00236	1.30264	0.00223	1.30264	-0.00273	1.30264	0.01979	1.30264	0.02978	1.30264	-0.00727
1.30103	0.000733353	1.30103	0.000617202	1.30103	0.00335	1.30443	0.00955	1.30443	-0.000152328	1.30443	0.00266	1.30443	0.00268	1.30443	0.01576	1.30443	0.03358	1.30443	-0.00467
1.30281	0.000728252	1.30281	0.000920093	1.30281	0.0028	1.30622	0.01183	1.30622	-0.00124	1.30622	-0.000898706	1.30622	0.00331	1.30622	0.01202	1.30622	0.03047	1.30622	0.00359
1.3046	0.000538185	1.3046	0.00109	1.3046	0.0025	1.308	0.01682	1.308	-0.00192	1.308	-0.00475	1.308	0.000761999	1.308	0.01178	1.308	0.02278	1.308	0.00372
1.30638	0.000264468	1.30638	0.00128	1.30638	0.00243	1.30979	0.021	1.30979	-0.00212	1.30979	-0.00733	1.30979	-0.00821	1.30979	0.00927	1.30979	0.01585	1.30979	0.00351
1.30816	-0.00011611	1.30816	0.000974916	1.30816	0.00297	1.31158	0.02384	1.31158	-0.000167521	1.31158	-0.01049	1.31158	-0.01175	1.31158	0.01057	1.31158	0.01342	1.31158	0.00476
1.30994	-0.000433582	1.30994	0.000803517	1.30994	0.00355	1.31337	0.02544	1.31337	-0.000355801	1.31337	-0.01631	1.31337	-0.0149	1.31337	0.01498	1.31337	0.01309	1.31337	0.00776
1.31172	-0.000406575	1.31172	0.000703814	1.31172	0.00365	1.31515	0.0235	1.31515	-0.000986609	1.31515	-0.01715	1.31515	-0.01396	1.31515	0.01933	1.31515	0.01112	1.31515	0.00361
1.31351	-0.000391211	1.31351	0.000154739	1.31351	0.0036	1.31694	0.01904	1.31694	-0.00312	1.31694	-0.01647	1.31694	-0.00773	1.31694	0.0253	1.31694	0.00717	1.31694	-0.00357
1.31529	-0.000612607	1.31529	-0.000459452	1.31529	0.00348	1.31873	0.01196	1.31873	-0.00514	1.31873	-0.01697	1.31873	-0.00201	1.31873	0.02791	1.31873	0.00451	1.31873	-0.00205
1.31707	-0.000855539	1.31707	-0.00115	1.31707	0.00376	1.32051	0.00511	1.32051	-0.00399	1.32051	-0.01684	1.32051	0.00756	1.32051	0.03097	1.32051	0.00253	1.32051	-0.000582867
1.31885	-0.000672913	1.31885	-0.00143	1.31885	0.00373	1.3223	0.00412	1.3223	-0.00383	1.3223	-0.01207	1.3223	0.01513	1.3223	0.03083	1.3223	-0.00326	1.3223	-0.00251
1.32064	-0.000461874	1.32064	-0.00133	1.32064	0.00358	1.32409	0.00679	1.32409	-0.00241	1.32409	-0.00772	1.32409	0.01663	1.32409	0.02548	1.32409	-0.01001	1.32409	0.00164
1.32242	-0.000389633	1.32242	-0.00107	1.32242	0.00353	1.32587	0.00896	1.32587	0.000960665	1.32587	-0.0053	1.32587	0.01615	1.32587	0.01908	1.32587	-0.01269	1.32587	0.0058
1.3242	-0.000233917	1.3242	-0.000866012	1.3242	0.00348	1.32766	0.01174	1.32766	0.00706	1.32766	-0.00233	1.32766	0.01188	1.32766	0.017	1.32766	-0.01341	1.32766	0.01092
1.32598	-0.000115937	1.32598	-0.000685407	1.32598	0.00383	1.32945	0.01239	1.32945	0.0129	1.32945	-0.00104	1.32945	0.00581	1.32945	0.01845	1.32945	-0.01267	1.32945	0.01446
1.32776	-0.00012575	1.32776	-0.000488067	1.32776	0.00395	1.33123	0.01223	1.33123	0.01308	1.33123	0.00159	1.33123	0.000558265	1.33123	0.01642	1.33123	-0.00756	1.33123	0.01272
1.32955	-0.000210492	1.32955	-0.000496845	1.32955	0.00448	1.33302	0.00706	1.33302	0.01218	1.33302	0.00433	1.33302	-0.00534	1.33302	0.02053	1.33302	-0.00278	1.33302	0.01862
1.33133	-0.000198284	1.33133	-0.00039397	1.33133	0.00479	1.33481	0.00105	1.33481	0.01088	1.33481	0.00676	1.33481	-0.00629	1.33481	0.02989	1.33481	0.00443	1.33481	0.01884
1.33311	-1.54601e-05	1.33311	-0.0004416	1.33311	0.00428	1.33659	-0.000436528	1.33659	0.00881	1.33659	0.00396	1.33659	-0.0089	1.33659	0.03476	1.33659	0.00975	1.33659	0.01797
1.33489	5.07447e-05	1.33489	-0.000320106	1.33489	0.00374	1.33838	0.00027749	1.33838	0.00362	1.33838	-0.00277	1.33838	-0.01461	1.33838	0.03807	1.33838	0.01511	1.33838	0.02037
1.33667	-4.79006e-05	1.33667	-0.000524059	1.33667	0.00345	1.34017	0.00302	1.34017	-0.00063229	1.34017	-0.00595	1.34017	-0.01133	1.34017	0.0405	1.34017	0.02523	1.34017	0.02167
1.33846	-3.24979e-05	1.33846	-0.000750837	1.33846	0.00303	1.34195	0.00513	1.34195	-0.00232	1.34195	-0.00442	1.34195	-0.0114	1.34195	0.03955	1.34195	0.02762	1.34195	0.02583
1.34024	-2.87987e-05	1.34024	-0.000959629	1.34024	0.00262	1.34374	0.00385	1.34374	-0.00532	1.34374	-0.00476	1.34374	-0.0136	1.34374	0.03706	1.34374	0.02852	1.34374	0.02867
1.34202	3.31598e-05	1.34202	-0.000979067	1.34202	0.00247	1.34553	0.00181	1.34553	-0.00806	1.34553	-0.00275	1.34553	-0.0104	1.34553	0.03558	1.34553	0.03154	1.34553	0.02855
1.3438	-6.69833e-05	1.3438	-0.00127	1.3438	0.0029	1.34731	-0.00174	1.34731	-0.00827	1.34731	0.00182	1.34731	-0.00527	1.34731	0.04065	1.34731	0.03511	1.34731	0.02754
1.34558	-0.00045062	1.34558	-0.00134	1.34558	0.00342	1.3491	-0.00487	1.3491	-0.00537	1.3491	0.0073	1.3491	0.000675075	1.3491	0.04004	1.3491	0.03621	1.3491	0.02853
1.34737	-0.000627348	1.34737	-0.000959021	1.34737	0.00353	1.35089	-0.00662	1.35089	-0.00607	1.35089	0.00695	1.35089	0.00428	1.35089	0.03864	1.35089	0.03369	1.35089	0.03087
1.34915	-0.000455177	1.34915	-0.000366122	1.34915	0.00357	1.35267	-0.00866	1.35267	-0.00812	1.35267	0.0056	1.35267	0.0064	1.35267	0.03678	1.35267	0.02752	1.35267	0.03426
1.35093	-0.000199782	1.35093	-0.00023122	1.35093	0.00371	1.35446	-0.00883	1.35446	-0.00818	1.35446	0.00564	1.35446	0.00997	1.35446	0.032	1.35446	0.01912	1.35446	0.04012
1.35271	-0.000309681	1.35271	-0.000432477	1.35271	0.00348	1.35625	-0.00849	1.35625	-0.00919	1.35625	0.00334	1.35625	0.01358	1.35625	0.02972	1.35625	0.00967	1.35625	0.04649
1.35449	-0.000440534	1.35449	-0.000590281	1.35449	0.00281	1.35803	-0.00637	1.35803	-0.01178	1.35803	-0.00207	1.35803	0.01396	1.35803	0.02934	1.35803	0.00749	1.35803	0.04994
1.35628	-0.000326564	1.35628	-0.000546064	1.35628	0.00216	1.35982	-0.00274	1.35982	-0.01537	1.35982	-0.00699	1.35982	0.01229	1.35982	0.0293	1.35982	0.00629	1.35982	0.05065
1.35806	-6.7918e-05	1.35806	-0.000756866	1.35806	0.00176	1.36161	0.00108	1.36161	-0.01462	1.36161	-0.00798	1.36161	0.01092	1.36161	0.03187	1.36161	0.00634	1.36161	0.05951
1.35984	0.000148669	1.35984	-0.000984171	1.35984	0.00132	1.36339	0.00358	1.36339	-0.01233	1.36339	-0.0061	1.36339	0.01156	1.36339	0.03279	1.36339	0.01028	1.36339	0.06085
1.36162	0.000340214	1.36162	-0.000836231	1.36162	0.00189	1.36518	0.00531	1.36518	-0.01148	1.36518	-0.00124	1.36518	0.00931	1.36518	0.03171	1.36518	0.01286	1.36518	0.05364
1.3634	0.000365508	1.3634	-0.000505282	1.3634	0.00279	1.36697	0.00687	1.36697	-0.01056	1.36697	0.00329	1.36697	0.00404	1.36697	0.02816	1.36697	0.01371	1.36697	0.05213
1.36519	0.000235494	1.36519	-0.00071249	1.36519	0.00359	1.36875	0.00755	1.36875	-0.00859	1.36875	0.00539	1.36875	-0.00557	1.36875	0.02526	1.36875	0.00998	1.36875	0.05297
1.36697	0.00017404	1.36697	-0.000803175	1.36697	0.00387	1.37054	0.00728	1.37054	-0.0074	1.37054	0.01042	1.37054	-0.00888	1.37054	0.02951	1.37054	0.00427	1.37054	0.04968
1.36875	0.000209128	1.36875	-0.000878677	1.36875	0.00379	1.37233	0.00712	1.37233	-0.00636	1.37233	0.01254	1.37233	-0.01594	1.37233	0.03026	1.37233	0.00179	1.37233	0.04237
1.37053	5.07256e-05	1.37053	-0.00125	1.37053	0.00379	1.37411	0.00724	1.37411	-0.00677	1.37411	0.00956	1.37411	-0.02016	1.37411	0.02821	1.37411	0.00159	1.37411	0.04289
1.37231	-0.000153965	1.37231	-0.00173	1.37231	0.00325	1.3759	0.0088	1.3759	-0.00247	1.3759	0.00444	1.3759	-0.0206	1.3759	0.02836	1.3759	-0.000821543	1.3759	0.04452
1.3741	-0.000165649	1.3741	-0.00197	1.3741	0.00255	1.37769	0.01098	1.37769	0.00132	1.37769	-0.00182	1.37769	-0.01762	1.37769	0.03113	1.37769	0.00114	1.37769	0.04284
1.37588	-0.000298368	1.37588	-0.00204	1.37588	0.0019	1.37947	0.01269	1.37947	0.00204	1.37947	-0.00387	1.37947	-0.01019	1.37947	0.03023	1.37947	0.00408	1.37947	0.03802
1.37766	-0.000747586	1.37766	-0.00199	1.37766	0.00127	1.38126	0.01056	1.38126	0.00233	1.38126	-0.00735	1.38126	-0.00775	1.38126	0.0262	1.38126	0.00418	1.38126	0.03604
1.37944	-0.000931149	1.37944	-0.00196	1.37944	0.000752129	1.38305	0.0076	1.38305	0.00361	1.38305	-0.00726	1.38305	-0.00847	1.38305	0.02344	1.38305	-0.000618039	1.38305	0.04064
1.38122	-0.000743479	1.38122	-0.0016	1.38122	0.000506185	1.38483	0.0035	1.38483	0.00618	1.38483	-0.0067	1.38483	-0.00814	1.38483	0.02256	1.38483	-0.004	1.38483	0.04169
1.383	-0.000402426	1.383	-0.00162	1.383	-0.000157038	1.38662	-0.00161	1.38662	0.00543	1.38662	-0.00924	1.38662	-0.0112	1.38662	0.02236	1.38662	-0.00173	1.38662	0.04309
1.38479	-0.00016816	1.38479	-0.00203	1.38479	-0.0009658	1.38841	-0.00571	1.38841	0.00525	1.38841	-0.0046	1.38841	-0.01655	1.38841	0.01816	1.38841	0.00126	1.38841	0.05029
1.38657	5.21261e-05	1.38657	-0.00235	1.38657	-0.00131	1.39019	-0.00623	1.39019	0.00299	1.39019	0.00173	1.39019	-0.01804	1.39019	0.01601	1.39019	0.00533	1.39019	0.05445
1.38835	0.000329252	1.38835	-0.00241	1.38835	-0.000904497	1.39198	-0.00433	1.39198	0.00194	1.39198	0.00418	1.39198	-0.01946	1.39198	0.01603	1.39198	0.00956	1.39198	0.05507
1.39013	0.000402622	1.39013	-0.00252	1.39013	-0.000559241	1.39376	-0.002	1.39376	0.0025	1.39376	0.00728	1.39376	-0.01686	1.39376	0.01673	1.39376	0.013	1.39376	0.05497
1.39191	0.000135739	1.39191	-0.00265	1.39191	-0.000337732	1.39555	0.00103	1.39555	0.00263	1.39555	0.013	1.39555	-0.01111	1.39555	0.01842	1.39555	0.01424	1.39555	0.05896
1.3937	-0.000231969	1.3937	-0.00252	1.3937	-0.000433468	1.39734	0.00355	1.39734	2.81666e-05	1.39734	0.01883	1.39734	-0.00935	1.39734	0.01869	1.39734	0.01469	1.39734	0.06074
1.39548	-0.000517603	1.39548	-0.00211	1.39548	-0.000369226	1.39912	0.00456	1.39912	-0.000823348	1.39912	0.02053	1.39912	-0.0067	1.39912	0.02328	1.39912	0.01572	1.39912	0.05963
1.39726	-0.000670984	1.39726	-0.00168	1.39726	-0.000130329	1.40091	0.0061	1.40091	0.00097049	1.40091	0.01942	1.40091	0.000731423	1.40091	0.02762	1.40091	0.01643	1.40091	0.05998
1.39904	-0.000754345	1.39904	-0.00169	1.39904	-0.000421473	1.4027	0.00919	1.4027	0.00112	1.4027	0.01827	1.4027	0.00888	1.4027	0.02313	1.4027	0.01586	1.4027	0.0596
1.40082	-0.000850515	1.40082	-0.00161	1.40082	-0.000644466	1.40448	0.00973	1.40448	-0.00264	1.40448	0.01429	1.40448	0.01024	1.40448	0.01918	1.40448	0.02014	1.40448	0.05758
1.4026	-0.00078248	1.4026	-0.0012	1.4026	-0.00056647	1.40627	0.00934	1.40627	-0.00566	1.40627	0.00739	1.40627	0.00838	1.40627	0.0142	1.40627	0.02082	1.40627	0.05417
1.40439	-0.000525743	1.40439	-0.000741872	1.40439	-0.000221185	1.40806	0.01283	1.40806	-0.00546	1.40806	0.00196	1.40806	0.0083	1.40806	0.00984	1.40806	0.01899	1.40806	0.04775
1.40617	-0.000296169	1.40617	-0.000510971	1.40617	0.000212102	1.40984	0.01471	1.40984	-0.00531	1.40984	0.000362366	1.40984	0.0054	1.40984	0.00678	1.40984	0.01836	1.40984	0.04402
1.40795	-6.24658e-05	1.40795	-0.000803968	1.40795	0.000427979	1.41163	0.01115	1.41163	-0.00504	1.41163	0.000482134	1.41163	0.00166	1.41163	0.00911	1.41163	0.01959	1.41163	0.03636
1.40973	-3.32779e-05	1.40973	-0.000864211	1.40973	0.000570218	1.41341	0.00529	1.41341	-0.00421	1.41341	0.0031	1.41341	-0.002	1.41341	0.01751	1.41341	0.02386	1.41341	0.03127
1.41151	-5.39318e-06	1.41151	-0.000564177	1.41151	0.000182701	1.4152	0.00201	1.4152	-0.00284	1.4152	0.00686	1.4152	-0.00278	1.4152	0.02616	1.4152	0.02529	1.4152	0.03239
1.41329	-0.000101293	1.41329	-0.00030334	1.41329	-8.72604e-05	1.41699	0.00101	1.41699	-0.00115	1.41699	0.0101	1.41699	-0.000678954	1.41699	0.02933	1.41699	0.02199	1.41699	0.03182
1.41508	-0.000423632	1.41508	-0.000178011	1.41508	-0.000242349	1.41877	-0.001	1.41877	0.00233	1.41877	0.01432	1.41877	0.000384192	1.41877	0.03209	1.41877	0.02797	1.41877	0.03091
1.41686	-0.000651453	1.41686	0.000116602	1.41686	-0.000271607	1.42056	0.000298412	1.42056	0.00359	1.42056	0.01747	1.42056	0.00216	1.42056	0.0361	1.42056	0.03046	1.42056	0.02485
1.41864	-0.000700056	1.41864	0.000261421	1.41864	-0.000257882	1.42235	0.00258	1.42235	4.11402e-05	1.42235	0.01877	1.42235	0.00744	1.42235	0.03892	1.42235	0.03314	1.42235	0.02388
1.42042	-0.000718379	1.42042	-0.000414545	1.42042	-0.000594197	1.42413	0.00292	1.42413	-0.00396	1.42413	0.01847	1.42413	0.00785	1.42413	0.04194	1.42413	0.03326	1.42413	0.02257
1.4222	-0.000575786	1.4222	-0.00118	1.4222	-0.000410973	1.42592	0.00142	1.42592	-0.00719	1.42592	0.01871	1.42592	0.00871	1.42592	0.04153	1.42592	0.0305	1.42592	0.01901
1.42398	-0.000442461	1.42398	-0.00177	1.42398	0.000279388	1.4277	0.000428712	1.4277	-0.00966	1.4277	0.01827	1.4277	0.00926	1.4277	0.04056	1.4277	0.02837	1.4277	0.02005
1.42577	-0.000373394	1.42577	-0.00222	1.42577	0.000786038	1.42949	-0.000247329	1.42949	-0.01164	1.42949	0.0158	1.42949	0.01031	1.42949	0.03799	1.42949	0.02272	1.42949	0.02545
1.42755	-0.000463295	1.42755	-0.00235	1.42755	0.000992481	1.43128	-0.000914219	1.43128	-0.01117	1.43128	0.01414	1.43128	0.01342	1.43128	0.03848	1.43128	0.02059	1.43128	0.0293
1.42933	-0.000564979	1.42933	-0.00243	1.42933	0.00137	1.43306	-0.00232	1.43306	-0.01049	1.43306	0.0049	1.43306	0.01737	1.43306	0.03838	1.43306	0.01734	1.43306	0.02987
1.43111	-0.000523718	1.43111	-0.00242	1.43111	0.00179	1.43485	0.000556579	1.43485	-0.00949	1.43485	0.00264	1.43485	0.02118	1.43485	0.03577	1.43485	0.01376	1.43485	0.02718
1.43289	-0.00047862	1.43289	-0.00242	1.43289	0.00139	1.43664	0.00508	1.43664	-0.01438	1.43664	0.00271	1.43664	0.02401	1.43664	0.03235	1.43664	0.01218	1.43664	0.02226
1.43467	-0.000711252	1.43467	-0.0023	1.43467	0.000879006	1.43842	0.0076	1.43842	-0.02026	1.43842	0.00286	1.43842	0.0246	1.43842	0.03187	1.43842	0.0082	1.43842	0.02127
1.43645	-0.000773855	1.43645	-0.00224	1.43645	0.000716803	1.44021	0.0077	1.44021	-0.02204	1.44021	0.00581	1.44021	0.02222	1.44021	0.03185	1.44021	0.00118	1.44021	0.01967
1.43824	-0.000619247	1.43824	-0.00223	1.43824	0.000493382	1.44199	0.00577	1.44199	-0.01859	1.44199	0.00932	1.44199	0.02181	1.44199	0.0266	1.44199	0.00241	1.44199	0.01262
1.44002	-0.000704787	1.44002	-0.00216	1.44002	1.66074e-05	1.44378	0.0072	1.44378	-0.01474	1.44378	0.01723	1.44378	0.0179	1.44378	0.02434	1.44378	0.0065	1.44378	0.01013
1.4418	-0.000599833	1.4418	-0.00228	1.4418	-0.000348766	1.44557	0.0101	1.44557	-0.01047	1.44557	0.02428	1.44557	0.02057	1.44557	0.02796	1.44557	0.00952	1.44557	0.01099
1.44358	-0.000349542	1.44358	-0.00224	1.44358	-0.000195038	1.44735	0.00847	1.44735	-0.00705	1.44735	0.02309	1.44735	0.01982	1.44735	0.02881	1.44735	0.00704	1.44735	0.01406
1.44536	-0.000168296	1.44536	-0.00189	1.44536	3.50982e-06	1.44914	0.00616	1.44914	-0.00743	1.44914	0.02284	1.44914	0.01565	1.44914	0.02853	1.44914	0.00706	1.44914	0.01404
1.44714	-0.000139829	1.44714	-0.00148	1.44714	0.00021117	1.45092	0.00396	1.45092	-0.00677	1.45092	0.02172	1.45092	0.01461	1.45092	0.03102	1.45092	0.00701	1.45092	0.01365
1.44892	1.85962e-05	1.44892	-0.00106	1.44892	0.000981095	1.45271	0.000335964	1.45271	-0.00565	1.45271	0.01937	1.45271	0.01565	1.45271	0.03358	1.45271	0.00401	1.45271	0.01676
1.45071	0.000203676	1.45071	-0.000700245	1.45071	0.00186	1.4545	-0.00241	1.4545	-0.00457	1.4545	0.01398	1.4545	0.01693	1.4545	0.03553	1.4545	-0.00234	1.4545	0.01804
1.45249	0.00051593	1.45249	-0.000412747	1.45249	0.0021	1.45628	-0.00822	1.45628	-0.00592	1.45628	0.00759	1.45628	0.01526	1.45628	0.03756	1.45628	-0.00539	1.45628	0.01967
1.45427	0.000790328	1.45427	-9.0977e-05	1.45427	0.00213	1.45807	-0.01041	1.45807	-0.00421	1.45807	0.00455	1.45807	0.0174	1.45807	0.03743	1.45807	-0.00842	1.45807	0.02126
1.45605	0.000964641	1.45605	-0.000269963	1.45605	0.00184	1.45985	-0.01256	1.45985	0.000156312	1.45985	0.00393	1.45985	0.02105	1.45985	0.04059	1.45985	-0.01005	1.45985	0.01898
1.45783	0.000966394	1.45783	-0.000721323	1.45783	0.00116	1.46164	-0.01245	1.46164	0.000107204	1.46164	0.000427716	1.46164	0.01944	1.46164	0.04335	1.46164	-0.00605	1.46164	0.01954
1.45961	0.000765637	1.45961	-0.00112	1.45961	0.000177099	1.46343	-0.01176	1.46343	-0.00387	1.46343	-0.00154	1.46343	0.01752	1.46343	0.04393	1.46343	-0.00135	1.46343	0.02136
1.46139	0.000397716	1.46139	-0.00166	1.46139	-0.000940547	1.46521	-0.01061	1.46521	-0.00645	1.46521	0.00293	1.46521	0.01184	1.46521	0.04257	1.46521	-0.000139037	1.46521	0.01941
1.46318	-2.01722e-05	1.46318	-0.00228	1.46318	-0.00185	1.467	-0.00877	1.467	-0.00924	1.467	0.00242	1.467	0.00656	1.467	0.04077	1.467	0.00124	1.467	0.02208
1.46496	-0.000371641	1.46496	-0.00269	1.46496	-0.00257	1.46878	-0.00497	1.46878	-0.01441	1.46878	0.00404	1.46878	0.00503	1.46878	0.03846	1.46878	0.00179	1.46878	0.02592
1.46674	-0.000534778	1.46674	-0.00297	1.46674	-0.00294	1.47057	-0.000516254	1.47057	-0.01743	1.47057	0.00753	1.47057	-0.000919645	1.47057	0.03779	1.47057	0.000858434	1.47057	0.02662
1.46852	-0.000434595	1.46852	-0.00302	1.46852	-0.00272	1.47236	0.00235	1.47236	-0.01987	1.47236	0.01149	1.47236	0.000396968	1.47236	0.03744	1.47236	-0.00231	1.47236	0.02239
1.4703	-0.000267467	1.4703	-0.00296	1.4703	-0.0024	1.47414	0.00485	1.47414	-0.01937	1.47414	0.0139	1.47414	-0.000669143	1.47414	0.03618	1.47414	-0.00895	1.47414	0.01569
1.47208	-7.92308e-05	1.47208	-0.00283	1.47208	-0.00186	1.47593	0.00392	1.47593	-0.02004	1.47593	0.01578	1.47593	0.00205	1.47593	0.03438	1.47593	-0.00972	1.47593	0.01549
1.47386	-0.000299479	1.47386	-0.00242	1.47386	-0.00153	1.47771	0.00309	1.47771	-0.02243	1.47771	0.02115	1.47771	0.00911	1.47771	0.02721	1.47771	-0.00821	1.47771	0.01484
1.47564	-0.000465614	1.47564	-0.00212	1.47564	-0.00175	1.4795	-0.000370326	1.4795	-0.02215	1.4795	0.02477	1.4795	0.01185	1.4795	0.02124	1.4795	-0.00688	1.4795	0.015
1.47743	-0.000587295	1.47743	-0.00185	1.47743	-0.002	1.48129	-0.00169	1.48129	-0.02528	1.48129	0.02594	1.48129	0.01321	1.48129	0.02116	1.48129	-0.00416	1.48129	0.01822
1.47921	-0.000768401	1.47921	-0.00173	1.47921	-0.00224	1.48307	-0.00177	1.48307	-0.02717	1.48307	0.02167	1.48307	0.01029	1.48307	0.01644	1.48307	-0.00574	1.48307	0.0213
1.48099	-0.000915611	1.48099	-0.0022	1.48099	-0.00298	1.48486	-0.00136	1.48486	-0.02596	1.48486	0.01265	1.48486	0.01139	1.48486	0.0098	1.48486	-0.00832	1.48486	0.02655
1.48277	-0.00117	1.48277	-0.00252	1.48277	-0.00377	1.48664	-0.00292	1.48664	-0.02651	1.48664	0.00384	1.48664	0.01045	1.48664	0.00589	1.48664	-0.00765	1.48664	0.02805
1.48455	-0.0014	1.48455	-0.00252	1.48455	-0.00413	1.48843	-0.00536	1.48843	-0.02701	1.48843	0.000304886	1.48843	0.01032	1.48843	0.00488	1.48843	-0.01166	1.48843	0.02435
1.48633	-0.00151	1.48633	-0.00249	1.48633	-0.0039	1.49022	-0.00722	1.49022	-0.02645	1.49022	-0.00254	1.49022	0.01293	1.49022	0.00484	1.49022	-0.01219	1.49022	0.02274
1.48811	-0.00154	1.48811	-0.00249	1.48811	-0.00384	1.492	-0.01015	1.492	-0.02481	1.492	-0.00496	1.492	0.01826	1.492	0.00312	1.492	-0.00988	1.492	0.0201
1.48989	-0.00129	1.48989	-0.00215	1.48989	-0.00373	1.49379	-0.0126	1.49379	-0.02005	1.49379	-0.00328	1.49379	0.02513	1.49379	0.01081	1.49379	-0.00939	1.49379	0.01195
1.49167	-0.00118	1.49167	-0.00181	1.49167	-0.00301	1.49557	-0.01269	1.49557	-0.0162	1.49557	0.00164	1.49557	0.03081	1.49557	0.0176	1.49557	-0.00621	1.49557	0.00715
1.49346	-0.000956327	1.49346	-0.00179	1.49346	-0.00298	1.49736	-0.01196	1.49736	-0.01665	1.49736	0.00419	1.49736	0.03299	1.49736	0.02171	1.49736	-0.00633	1.49736	0.01074
1.49524	-0.000761802	1.49524	-0.00205	1.49524	-0.00291	1.49914	-0.01196	1.49914	-0.01524	1.49914	0.00407	1.49914	0.0327	1.49914	0.02683	1.49914	-0.00307	1.49914	0.01428
1.49702	-0.000704945	1.49702	-0.00228	1.49702	-0.00305	1.50093	-0.01056	1.50093	-0.01371	1.50093	0.00761	1.50093	0.02966	1.50093	0.03184	1.50093	-0.0011	1.50093	0.01161
1.4988	-0.000610932	1.4988	-0.0024	1.4988	-0.00321	1.50272	-0.00777	1.50272	-0.0174	1.50272	0.00994	1.50272	0.02161	1.50272	0.03982	1.50272	-0.000203105	1.50272	0.01108
1.50058	-0.000641894	1.50058	-0.00247	1.50058	-0.00339	1.5045	-0.00555	1.5045	-0.02126	1.5045	0.0093	1.5045	0.0147	1.5045	0.04178	1.5045	0.00479	1.5045	0.01157
1.50236	-0.000581082	1.50236	-0.00251	1.50236	-0.00357	1.50629	-0.00299	1.50629	-0.02269	1.50629	0.01288	1.50629	0.00909	1.50629	0.04234	1.50629	0.01106	1.50629	0.01109
1.50414	-0.00062287	1.50414	-0.00238	1.50414	-0.00345	1.50807	-0.000568003	1.50807	-0.0246	1.50807	0.01345	1.50807	0.00477	1.50807	0.03989	1.50807	0.01001	1.50807	0.00904
1.50592	-0.000757518	1.50592	-0.00208	1.50592	-0.00347	1.50986	0.000194908	1.50986	-0.02697	1.50986	0.01569	1.50986	0.0062	1.50986	0.03534	1.50986	0.00586	1.50986	0.01314
1.5077	-0.00101	1.5077	-0.00164	1.5077	-0.00372	1.51164	-0.00144	1.51164	-0.02894	1.51164	0.01683	1.51164	0.00723	1.51164	0.03375	1.51164	0.00466	1.51164	0.01851
1.50949	-0.00129	1.50949	-0.00133	1.50949	-0.00334	1.51343	-0.00336	1.51343	-0.02871	1.51343	0.01076	1.51343	0.00709	1.51343	0.03151	1.51343	0.00515	1.51343	0.02077
1.51127	-0.0012	1.51127	-0.00103	1.51127	-0.00346	1.51522	-0.00613	1.51522	-0.02845	1.51522	0.01109	1.51522	0.00743	1.51522	0.02786	1.51522	0.00534	1.51522	0.02257
1.51305	-0.00117	1.51305	-0.00084554	1.51305	-0.00343	1.517	-0.0089	1.517	-0.02615	1.517	0.00932	1.517	0.01241	1.517	0.02772	1.517	0.00482	1.517	0.02137
1.51483	-0.00128	1.51483	-0.000549396	1.51483	-0.00356	1.51879	-0.00932	1.51879	-0.02204	1.51879	0.00589	1.51879	0.0123	1.51879	0.02656	1.51879	0.00844	1.51879	0.01993
1.51661	-0.00128	1.51661	-0.000636456	1.51661	-0.00352	1.52057	-0.01111	1.52057	-0.01909	1.52057	0.00802	1.52057	0.01024	1.52057	0.02537	1.52057	0.01296	1.52057	0.02023
1.51839	-0.00123	1.51839	-0.000734493	1.51839	-0.00357	1.52236	-0.01265	1.52236	-0.0221	1.52236	0.00809	1.52236	0.0095	1.52236	0.02655	1.52236	0.01779	1.52236	0.01799
1.52017	-0.00101	1.52017	-0.000691835	1.52017	-0.00407	1.52414	-0.01487	1.52414	-0.024	1.52414	0.00776	1.52414	0.00686	1.52414	0.02636	1.52414	0.01511	1.52414	0.01115
1.52195	-0.00089756	1.52195	-0.000791008	1.52195	-0.00444	1.52593	-0.01502	1.52593	-0.02255	1.52593	0.0025	1.52593	0.00154	1.52593	0.02516	1.52593	0.01371	1.52593	0.00603
1.52373	-0.000740928	1.52373	-0.000875425	1.52373	-0.00449	1.52772	-0.01361	1.52772	-0.0214	1.52772	-0.00325	1.52772	-0.00555	1.52772	0.01958	1.52772	0.01195	1.52772	0.00261
1.52551	-0.000680195	1.52551	-0.000991074	1.52551	-0.00454	1.5295	-0.01346	1.5295	-0.01957	1.5295	-0.00454	1.5295	-0.00791	1.5295	0.01416	1.5295	0.00605	1.5295	-0.000584561
1.5273	-0.000866795	1.5273	-0.00115	1.5273	-0.00422	1.53129	-0.01082	1.53129	-0.01996	1.53129	-0.00768	1.53129	-0.00621	1.53129	0.00759	1.53129	0.000825111	1.53129	-0.00297
1.52908	-0.000956111	1.52908	-0.00119	1.52908	-0.00362	1.53307	-0.01003	1.53307	-0.01917	1.53307	-0.01113	1.53307	-0.00307	1.53307	0.00418	1.53307	-0.00271	1.53307	-0.00432
1.53086	-0.00113	1.53086	-0.00108	1.53086	-0.00351	1.53486	-0.01073	1.53486	-0.02063	1.53486	-0.00622	1.53486	-0.00143	1.53486	0.00247	1.53486	-0.00416	1.53486	-0.00101
1.53264	-0.00115	1.53264	-0.000889706	1.53264	-0.00325	1.53664	-0.01246	1.53664	-0.02482	1.53664	-0.00609	1.53664	0.00226	1.53664	0.00393	1.53664	-0.00966	1.53664	0.00265
1.53442	-0.00143	1.53442	-0.000552834	1.53442	-0.00297	1.53843	-0.01426	1.53843	-0.02781	1.53843	-0.00863	1.53843	0.00629	1.53843	0.00598	1.53843	-0.01049	1.53843	0.000800116
1.5362	-0.00164	1.5362	-0.000376385	1.5362	-0.00282	1.54021	-0.01604	1.54021	-0.03043	1.54021	-0.00521	1.54021	0.01207	1.54021	0.00637	1.54021	-0.01109	1.54021	0.00143
1.53798	-0.00163	1.53798	2.03108e-05	1.53798	-0.00299	1.542	-0.01772	1.542	-0.03095	1.542	-0.00294	1.542	0.01227	1.542	0.0108	1.542	-0.0141	1.542	0.0054
1.53976	-0.0014	1.53976	0.000379849	1.53976	-0.00359	1.54378	-0.01549	1.54378	-0.02976	1.54378	-0.000410231	1.54378	0.00159	1.54378	0.01292	1.54378	-0.01625	1.54378	0.0082
1.54154	-0.000852483	1.54154	0.000535326	1.54154	-0.00377	1.54557	-0.01116	1.54557	-0.02621	1.54557	0.0013	1.54557	-0.0031	1.54557	0.0137	1.54557	-0.01648	1.54557	0.01415
1.54332	-0.000399974	1.54332	0.000616331	1.54332	-0.00341	1.54736	-0.00799	1.54736	-0.0226	1.54736	0.00559	1.54736	-0.00421	1.54736	0.0168	1.54736	-0.01291	1.54736	0.01787
1.5451	-3.22458e-05	1.5451	0.000773609	1.5451	-0.00325	1.54914	-0.00799	1.54914	-0.01907	1.54914	0.01125	1.54914	-0.00824	1.54914	0.02087	1.54914	-0.01068	1.54914	0.02205
1.54688	0.000216762	1.54688	0.000546592	1.54688	-0.00278	1.55093	-0.00834	1.55093	-0.01256	1.55093	0.01679	1.55093	-0.00989	1.55093	0.02195	1.55093	-0.0064	1.55093	0.02341
1.54867	7.12279e-05	1.54867	-2.37208e-05	1.54867	-0.00213	1.55271	-0.00821	1.55271	-0.01	1.55271	0.02014	1.55271	-0.00629	1.55271	0.02006	1.55271	0.00184	1.55271	0.02427
1.55045	-0.000210219	1.55045	-0.000414916	1.55045	-0.00211	1.5545	-0.00886	1.5545	-0.00736	1.5545	0.0245	1.5545	0.00184	1.5545	0.01499	1.5545	0.01021	1.5545	0.01728
1.55223	-0.000416136	1.55223	-0.000851199	1.55223	-0.00246	1.55628	-0.00811	1.55628	-0.00602	1.55628	0.0265	1.55628	0.00713	1.55628	0.01441	1.55628	0.0199	1.55628	0.01262
1.55401	-0.000396468	1.55401	-0.00118	1.55401	-0.00297	1.55807	-0.00471	1.55807	-0.00593	1.55807	0.02462	1.55807	0.00711	1.55807	0.01442	1.55807	0.02414	1.55807	0.01007
1.55579	-0.000400909	1.55579	-0.00148	1.55579	-0.00342	1.55985	-0.00248	1.55985	-0.00661	1.55985	0.02314	1.55985	0.00387	1.55985	0.01592	1.55985	0.02371	1.55985	0.00422
1.55757	-0.000656127	1.55757	-0.00184	1.55757	-0.00367	1.56164	0.000339829	1.56164	-0.00899	1.56164	0.02464	1.56164	0.00549	1.56164	0.01413	1.56164	0.02168	1.56164	-0.00186
1.55935	-0.000709324	1.55935	-0.00183	1.55935	-0.00404	1.56342	0.00379	1.56342	-0.00819	1.56342	0.02486	1.56342	0.0069	1.56342	0.01185	1.56342	0.01593	1.56342	-0.00657
1.56113	-0.000835405	1.56113	-0.00188	1.56113	-0.00476	1.56521	0.00477	1.56521	-0.00745	1.56521	0.02992	1.56521	0.00815	1.56521	0.01365	1.56521	0.00815	1.56521	-0.00431
1.56291	-0.0011	1.56291	-0.00205	1.56291	-0.00517	1.567	0.00409	1.567	-0.00495	1.567	0.03278	1.567	0.00945	1.567	0.00964	1.567	0.0056	1.567	-0.00514
1.56469	-0.00146	1.56469	-0.00208	1.56469	-0.0057	1.56878	0.00382	1.56878	-0.0029	1.56878	0.03284	1.56878	0.01253	1.56878	0.0101	1.56878	0.00822	1.56878	-0.00645
1.56647	-0.0016	1.56647	-0.002	1.56647	-0.00635	1.57057	0.00401	1.57057	-0.00344	1.57057	0.03135	1.57057	0.01575	1.57057	0.011	1.57057	0.01114	1.57057	-0.00777
1.56825	-0.00153	1.56825	-0.00188	1.56825	-0.00679	1.57235	0.00355	1.57235	-0.0026	1.57235	0.02438	1.57235	0.01934	1.57235	0.01479	1.57235	0.00972	1.57235	-0.0059
1.57003	-0.00156	1.57003	-0.0015	1.57003	-0.00715	1.57414	0.00050004	1.57414	-0.00053574	1.57414	0.02349	1.57414	0.01971	1.57414	0.01836	1.57414	0.00951	1.57414	-0.00643
1.57181	-0.00167	1.57181	-0.00112	1.57181	-0.00731	1.57592	0.00117	1.57592	-0.00251	1.57592	0.01705	1.57592	0.0173	1.57592	0.01824	1.57592	0.00997	1.57592	-0.01015
1.57359	-0.00175	1.57359	-0.000610856	1.57359	-0.00735	1.57771	0.000997558	1.57771	-0.00561	1.57771	0.01062	1.57771	0.01653	1.57771	0.02025	1.57771	0.00803	1.57771	-0.01135
1.57538	-0.00164	1.57538	-0.000145958	1.57538	-0.00702	1.57949	0.0014	1.57949	-0.00706	1.57949	0.00845	1.57949	0.01633	1.57949	0.0194	1.57949	0.00377	1.57949	-0.01352
1.57716	-0.00169	1.57716	0.000189171	1.57716	-0.00636	1.58128	0.00257	1.58128	-0.00876	1.58128	0.0052	1.58128	0.01793	1.58128	0.01508	1.58128	-0.000698569	1.58128	-0.01304
1.57894	-0.00175	1.57894	0.000343961	1.57894	-0.00599	1.58306	0.00298	1.58306	-0.01229	1.58306	0.00288	1.58306	0.01871	1.58306	0.01347	1.58306	-0.000550605	1.58306	-0.01216
1.58072	-0.00184	1.58072	0.000425124	1.58072	-0.0056	1.58485	0.00281	1.58485	-0.01617	1.58485	0.00329	1.58485	0.0163	1.58485	0.01631	1.58485	-0.000504788	1.58485	-0.01333
1.5825	-0.00183	1.5825	0.000350706	1.5825	-0.00469	1.58663	0.00232	1.58663	-0.01209	1.58663	-0.00216	1.58663	0.0165	1.58663	0.02062	1.58663	0.00125	1.58663	-0.01119
1.58428	-0.0017	1.58428	0.000339966	1.58428	-0.00393	1.58842	0.00205	1.58842	-0.01026	1.58842	-0.00191	1.58842	0.0164	1.58842	0.02759	1.58842	0.00581	1.58842	-0.00877
1.58606	-0.00158	1.58606	0.00021707	1.58606	-0.00324	1.5902	0.00155	1.5902	-0.01079	1.5902	-0.00328	1.5902	0.0152	1.5902	0.03155	1.5902	0.00937	1.5902	-0.00377
1.58784	-0.0015	1.58784	-2.04147e-05	1.58784	-0.0029	1.59199	0.000365957	1.59199	-0.01018	1.59199	-0.0094	1.59199	0.01483	1.59199	0.02942	1.59199	0.01331	1.59199	0.00274
1.58962	-0.00149	1.58962	-0.000342399	1.58962	-0.0027	1.59377	-0.00196	1.59377	-0.01027	1.59377	-0.00796	1.59377	0.01771	1.59377	0.02965	1.59377	0.01444	1.59377	0.00858
1.5914	-0.00139	1.5914	-0.000896212	1.5914	-0.00232	1.59556	-0.00253	1.59556	-0.00899	1.59556	-0.00554	1.59556	0.01933	1.59556	0.02746	1.59556	0.01303	1.59556	0.02018
1.59318	-0.00123	1.59318	-0.00141	1.59318	-0.00239	1.59734	-0.00224	1.59734	-0.00558	1.59734	-0.00431	1.59734	0.01831	1.59734	0.02389	1.59734	0.01139	1.59734	0.02763
1.59496	-0.00112	1.59496	-0.00158	1.59496	-0.00269	1.59913	-0.00233	1.59913	-0.00157	1.59913	-0.00466	1.59913	0.0139	1.59913	0.02011	1.59913	0.00588	1.59913	0.03016
1.59674	-0.00116	1.59674	-0.00139	1.59674	-0.00245	1.60091	-0.00199	1.60091	0.00115	1.60091	-0.00223	1.60091	0.00745	1.60091	0.01669	1.60091	0.0017	1.60091	0.03197
1.59852	-0.00123	1.59852	-0.00123	1.59852	-0.00215	1.6027	0.000407961	1.6027	0.000622003	1.6027	0.00158	1.6027	0.01194	1.6027	0.01799	1.6027	-0.00351	1.6027	0.03606
1.6003	-0.0014	1.6003	-0.00139	1.6003	-0.00249	1.60448	0.00484	1.60448	-0.000661015	1.60448	0.00414	1.60448	0.01408	1.60448	0.01701	1.60448	-0.00656	1.60448	0.03425
1.60208	-0.00135	1.60208	-0.00129	1.60208	-0.00264	1.60627	0.00859	1.60627	-0.000141856	1.60627	0.00902	1.60627	0.0166	1.60627	0.01535	1.60627	-0.00845	1.60627	0.03284
1.60386	-0.00136	1.60386	-0.000942202	1.60386	-0.00269	1.60805	0.0099	1.60805	0.000609962	1.60805	0.02194	1.60805	0.0203	1.60805	0.01123	1.60805	-0.00816	1.60805	0.03691
1.60564	-0.00125	1.60564	-0.000653276	1.60564	-0.00277	1.60984	0.01156	1.60984	-0.000444199	1.60984	0.02636	1.60984	0.02422	1.60984	0.00629	1.60984	-0.00669	1.60984	0.03935
1.60742	-0.00123	1.60742	-0.000804074	1.60742	-0.003	1.61162	0.01341	1.61162	-0.00143	1.61162	0.02581	1.61162	0.02658	1.61162	0.00172	1.61162	-0.00574	1.61162	0.04347
1.6092	-0.00127	1.6092	-0.0011	1.6092	-0.00331	1.61341	0.01314	1.61341	0.00182	1.61341	0.02923	1.61341	0.02155	1.61341	0.00166	1.61341	-0.00253	1.61341	0.04942
1.61098	-0.00115	1.61098	-0.000885501	1.61098	-0.0036	1.61519	0.01145	1.61519	0.00381	1.61519	0.02807	1.61519	0.021	1.61519	0.0051	1.61519	0.00679	1.61519	0.05184
1.61276	-0.000888895	1.61276	-0.000668933	1.61276	-0.00347	1.61698	0.01109	1.61698	0.00326	1.61698	0.02583	1.61698	0.02081	1.61698	0.00938	1.61698	0.00771	1.61698	0.05074
1.61455	-0.000610544	1.61455	-0.000598638	1.61455	-0.00339	1.61876	0.01003	1.61876	0.00196	1.61876	0.02221	1.61876	0.02299	1.61876	0.01381	1.61876	0.00368	1.61876	0.04726
1.61633	-0.000497002	1.61633	-0.000421608	1.61633	-0.00358	1.62055	0.00726	1.62055	0.00271	1.62055	0.01768	1.62055	0.0276	1.62055	0.01677	1.62055	0.00622	1.62055	0.04276
1.61811	-0.000478057	1.61811	-4.28183e-05	1.61811	-0.0037	1.62233	0.00296	1.62233	0.000865043	1.62233	0.01504	1.62233	0.02337	1.62233	0.01998	1.62233	0.00336	1.62233	0.03712
1.61989	-0.000569418	1.61989	0.000383549	1.61989	-0.00338	1.62412	-0.000764759	1.62412	-0.00117	1.62412	0.01726	1.62412	0.01829	1.62412	0.0161	1.62412	-0.00254	1.62412	0.03243
1.62167	-0.000580479	1.62167	0.000467015	1.62167	-0.00288	1.6259	-0.00422	1.6259	-0.000148621	1.6259	0.02055	1.6259	0.01816	1.6259	0.01224	1.6259	-0.00619	1.6259	0.02831
1.62345	-0.000541068	1.62345	0.00014773	1.62345	-0.00261	1.62769	-0.00994	1.62769	0.00224	1.62769	0.02079	1.62769	0.01672	1.62769	0.01051	1.62769	-0.00612	1.62769	0.02896
1.62523	-0.000527729	1.62523	0.000221143	1.62523	-0.00268	1.62947	-0.01039	1.62947	0.00597	1.62947	0.01952	1.62947	0.01449	1.62947	0.00909	1.62947	-0.00253	1.62947	0.03142
1.62701	-0.000398416	1.62701	0.000203848	1.62701	-0.00276	1.63126	-0.00865	1.63126	0.00638	1.63126	0.0162	1.63126	0.01254	1.63126	0.00978	1.63126	-0.00252	1.63126	0.03071
1.62879	-0.000374678	1.62879	0.000145507	1.62879	-0.00262	1.63304	-0.00517	1.63304	0.00725	1.63304	0.01521	1.63304	0.01581	1.63304	0.01152	1.63304	0.00112	1.63304	0.03516
1.63057	-0.000488007	1.63057	0.000310587	1.63057	-0.00252	1.63483	-0.0018	1.63483	0.00714	1.63483	0.01238	1.63483	0.02074	1.63483	0.0163	1.63483	0.00703	1.63483	0.0383
1.63235	-0.000593661	1.63235	0.000400106	1.63235	-0.00261	1.63661	0.00109	1.63661	0.00886	1.63661	0.00942	1.63661	0.01712	1.63661	0.01574	1.63661	0.01066	1.63661	0.04013
1.63413	-0.000828221	1.63413	0.000273085	1.63413	-0.00269	1.6384	0.00662	1.6384	0.01216	1.6384	0.00983	1.6384	0.01649	1.6384	0.01353	1.6384	0.01244	1.6384	0.03954
1.63591	-0.00105	1.63591	6.18573e-05	1.63591	-0.0028	1.64018	0.00913	1.64018	0.01351	1.64018	0.00647	1.64018	0.01611	1.64018	0.01251	1.64018	0.01057	1.64018	0.03757
1.63769	-0.00114	1.63769	-0.00013178	1.63769	-0.00299	1.64197	0.01013	1.64197	0.01475	1.64197	0.00397	1.64197	0.01182	1.64197	0.01321	1.64197	0.00831	1.64197	0.03622
1.63947	-0.00106	1.63947	-0.000212655	1.63947	-0.0028	1.64375	0.01129	1.64375	0.01996	1.64375	0.00121	1.64375	0.00978	1.64375	0.01641	1.64375	0.00609	1.64375	0.03052
1.64125	-0.000666312	1.64125	-0.000309105	1.64125	-0.00294	1.64554	0.0144	1.64554	0.02259	1.64554	-0.00355	1.64554	0.01549	1.64554	0.01514	1.64554	0.00769	1.64554	0.0271
1.64303	-0.000205372	1.64303	-0.000361492	1.64303	-0.00291	1.64732	0.01655	1.64732	0.02236	1.64732	-0.00666	1.64732	0.01876	1.64732	0.01711	1.64732	0.00928	1.64732	0.02699
1.64481	0.000214601	1.64481	2.99906e-05	1.64481	-0.00274	1.64911	0.02034	1.64911	0.02187	1.64911	-0.01026	1.64911	0.02083	1.64911	0.01919	1.64911	0.0079	1.64911	0.02378
1.64659	0.000522647	1.64659	0.000539874	1.64659	-0.00284	1.65089	0.02397	1.65089	0.02449	1.65089	-0.01247	1.65089	0.02189	1.65089	0.01915	1.65089	0.00505	1.65089	0.02143
1.64837	0.000505121	1.64837	0.000638334	1.64837	-0.00264	1.65268	0.02491	1.65268	0.02523	1.65268	-0.01508	1.65268	0.02585	1.65268	0.01998	1.65268	0.00582	1.65268	0.02354
1.65015	0.000491823	1.65015	0.000516946	1.65015	-0.0028	1.65446	0.02443	1.65446	0.02298	1.65446	-0.01568	1.65446	0.02835	1.65446	0.01804	1.65446	0.00792	1.65446	0.02519
1.65193	0.000504908	1.65193	0.000248276	1.65193	-0.00316	1.65625	0.0215	1.65625	0.02151	1.65625	-0.01161	1.65625	0.02479	1.65625	0.02099	1.65625	0.00318	1.65625	0.02663
1.65371	0.000485066	1.65371	0.00010359	1.65371	-0.0032	1.65803	0.02025	1.65803	0.02076	1.65803	-0.00989	1.65803	0.0231	1.65803	0.02124	1.65803	0.00289	1.65803	0.02598
1.65549	0.000362315	1.65549	4.87415e-05	1.65549	-0.00298	1.65982	0.01814	1.65982	0.01926	1.65982	-0.00754	1.65982	0.02024	1.65982	0.01924	1.65982	0.00901	1.65982	0.02002
1.65727	0.000374388	1.65727	9.77473e-05	1.65727	-0.00272	1.6616	0.0179	1.6616	0.01857	1.6616	-0.00557	1.6616	0.01699	1.6616	0.01919	1.6616	0.01203	1.6616	0.01556
1.65905	0.000546188	1.65905	0.000320767	1.65905	-0.00311	1.66338	0.01857	1.66338	0.01861	1.66338	-0.00196	1.66338	0.0154	1.66338	0.01772	1.66338	0.01029	1.66338	0.01227
1.66083	0.000744044	1.66083	0.000369508	1.66083	-0.00332	1.66517	0.01647	1.66517	0.01964	1.66517	-0.00415	1.66517	0.01027	1.66517	0.0129	1.66517	0.01222	1.66517	0.01075
1.66261	0.000765307	1.66261	0.000676947	1.66261	-0.00338	1.66695	0.0133	1.66695	0.02222	1.66695	-0.00539	1.66695	0.00826	1.66695	0.01052	1.66695	0.01304	1.66695	0.0131
1.66439	0.00062176	1.66439	0.000826844	1.66439	-0.00321	1.66874	0.01098	1.66874	0.02437	1.66874	-0.00591	1.66874	0.01051	1.66874	0.01112	1.66874	0.01258	1.66874	0.01483
1.66617	0.000409204	1.66617	0.000701701	1.66617	-0.00308	1.67052	0.01098	1.67052	0.02623	1.67052	-0.00597	1.67052	0.01447	1.67052	0.01276	1.67052	0.00649	1.67052	0.01791
1.66795	0.000353047	1.66795	0.00063823	1.66795	-0.00291	1.67231	0.01072	1.67231	0.02801	1.67231	-0.00709	1.67231	0.02163	1.67231	0.01892	1.67231	0.00168	1.67231	0.01671
1.66973	0.000440164	1.66973	0.00063516	1.66973	-0.00242	1.67409	0.01327	1.67409	0.03094	1.67409	-0.01037	1.67409	0.02454	1.67409	0.0243	1.67409	-0.00347	1.67409	0.01002
1.67151	0.000345471	1.67151	0.000771042	1.67151	-0.00183	1.67588	0.01853	1.67588	0.03455	1.67588	-0.01144	1.67588	0.02915	1.67588	0.03188	1.67588	-0.00926	1.67588	0.01191
1.67329	0.000235864	1.67329	0.000975499	1.67329	-0.00143	1.67766	0.01948	1.67766	0.03774	1.67766	-0.01177	1.67766	0.03593	1.67766	0.03589	1.67766	-0.00993	1.67766	0.01174
1.67507	2.31711e-05	1.67507	0.0012	1.67507	-0.0015	1.67945	0.01933	1.67945	0.03639	1.67945	-0.00921	1.67945	0.04168	1.67945	0.03818	1.67945	-0.01049	1.67945	0.01383
1.67685	-0.000347555	1.67685	0.00154	1.67685	-0.00169	1.68123	0.01851	1.68123	0.03201	1.68123	-0.00852	1.68123	0.04715	1.68123	0.04226	1.68123	-0.00608	1.68123	0.01931
1.67863	-0.000907822	1.67863	0.00186	1.67863	-0.00191	1.68302	0.01708	1.68302	0.02969	1.68302	-0.00663	1.68302	0.04825	1.68302	0.04176	1.68302	-0.00263	1.68302	0.02284
1.68041	-0.00134	1.68041	0.00191	1.68041	-0.00236	1.6848	0.01631	1.6848	0.02591	1.6848	0.000194077	1.6848	0.04972	1.6848	0.03877	1.6848	-0.003	1.6848	0.0324
1.68219	-0.00158	1.68219	0.0021	1.68219	-0.00302	1.68658	0.01483	1.68658	0.02436	1.68658	0.00614	1.68658	0.05633	1.68658	0.03846	1.68658	-0.0042	1.68658	0.03522
1.68397	-0.00154	1.68397	0.00211	1.68397	-0.00326	1.68837	0.01412	1.68837	0.02269	1.68837	0.00875	1.68837	0.06103	1.68837	0.03584	1.68837	-0.00736	1.68837	0.03597
1.68575	-0.00136	1.68575	0.00211	1.68575	-0.00346	1.69015	0.0141	1.69015	0.02202	1.69015	0.006	1.69015	0.0602	1.69015	0.03115	1.69015	-0.00516	1.69015	0.03035
1.68753	-0.00121	1.68753	0.00192	1.68753	-0.00368	1.69194	0.01185	1.69194	0.02003	1.69194	0.00794	1.69194	0.06333	1.69194	0.02763	1.69194	-0.0047	1.69194	0.02042
1.68931	-0.00108	1.68931	0.00149	1.68931	-0.00365	1.69372	0.00926	1.69372	0.01803	1.69372	0.00977	1.69372	0.06451	1.69372	0.0243	1.69372	-0.00417	1.69372	0.01521
1.69109	-0.00108	1.69109	0.00121	1.69109	-0.00365	1.69551	0.00892	1.69551	0.02016	1.69551	0.00424	1.69551	0.05669	1.69551	0.02453	1.69551	0.000875293	1.69551	0.00746
1.69287	-0.00102	1.69287	0.000969045	1.69287	-0.00351	1.69729	0.00978	1.69729	0.01963	1.69729	0.00178	1.69729	0.05174	1.69729	0.02523	1.69729	0.00342	1.69729	0.00362
1.69465	-0.000920401	1.69465	0.000748985	1.69465	-0.00373	1.69908	0.0056	1.69908	0.01559	1.69908	0.00375	1.69908	0.0475	1.69908	0.02714	1.69908	0.00468	1.69908	0.00217
1.69643	-0.000867203	1.69643	0.000994538	1.69643	-0.00372	1.70086	0.00371	1.70086	0.01867	1.70086	0.0038	1.70086	0.04555	1.70086	0.02896	1.70086	0.00528	1.70086	0.00247
1.69821	-0.000689892	1.69821	0.00159	1.69821	-0.00329	1.70264	0.00372	1.70264	0.02363	1.70264	0.00592	1.70264	0.04319	1.70264	0.03224	1.70264	0.00736	1.70264	0.000373034
1.69999	-0.000504383	1.69999	0.0019	1.69999	-0.00283	1.70443	0.00422	1.70443	0.02406	1.70443	0.00713	1.70443	0.03812	1.70443	0.03313	1.70443	0.00822	1.70443	-2.73433e-05
1.70177	-0.000198693	1.70177	0.00229	1.70177	-0.00239	1.70621	0.00393	1.70621	0.02192	1.70621	0.01403	1.70621	0.03691	1.70621	0.03617	1.70621	0.00414	1.70621	0.00244
1.70355	1.85037e-06	1.70355	0.00256	1.70355	-0.00167	1.708	0.00216	1.708	0.02018	1.708	0.02039	1.708	0.03696	1.708	0.03528	1.708	0.0026	1.708	0.00358
1.70533	1.3396e-05	1.70533	0.00269	1.70533	-0.00148	1.70978	0.00437	1.70978	0.02019	1.70978	0.02141	1.70978	0.03802	1.70978	0.03156	1.70978	0.00294	1.70978	0.00113
1.7071	-0.000117707	1.7071	0.00249	1.7071	-0.00173	1.71157	0.00394	1.71157	0.01743	1.71157	0.02633	1.71157	0.03767	1.71157	0.03577	1.71157	-0.00217	1.71157	0.000856706
1.70888	-0.000449101	1.70888	0.00218	1.70888	-0.00223	1.71335	0.00349	1.71335	0.01596	1.71335	0.02441	1.71335	0.03272	1.71335	0.03886	1.71335	-0.00683	1.71335	0.000902701
1.71066	-0.00075333	1.71066	0.00202	1.71066	-0.00246	1.71513	0.00419	1.71513	0.01923	1.71513	0.0206	1.71513	0.03171	1.71513	0.03969	1.71513	-0.00909	1.71513	0.00217
1.71244	-0.000746127	1.71244	0.00198	1.71244	-0.00262	1.71692	0.0044	1.71692	0.01937	1.71692	0.01739	1.71692	0.0287	1.71692	0.03804	1.71692	-0.00668	1.71692	0.00425
1.71422	-0.000728856	1.71422	0.00172	1.71422	-0.00292	1.7187	0.00517	1.7187	0.01849	1.7187	0.01465	1.7187	0.02528	1.7187	0.03894	1.7187	-0.00466	1.7187	0.00736
1.716	-0.000807852	1.716	0.00123	1.716	-0.00308	1.72049	0.00692	1.72049	0.02129	1.72049	0.01577	1.72049	0.02262	1.72049	0.04135	1.72049	-0.00474	1.72049	0.01217
1.71778	-0.000800941	1.71778	0.00102	1.71778	-0.00299	1.72227	0.00683	1.72227	0.02373	1.72227	0.01484	1.72227	0.01998	1.72227	0.0395	1.72227	-0.00239	1.72227	0.01876
1.71956	-0.000888058	1.71956	0.000785191	1.71956	-0.0028	1.72406	0.00673	1.72406	0.02305	1.72406	0.01417	1.72406	0.02182	1.72406	0.03394	1.72406	-0.000862401	1.72406	0.02444
1.72134	-0.000932765	1.72134	0.000519669	1.72134	-0.0028	1.72584	0.00832	1.72584	0.02335	1.72584	0.02142	1.72584	0.02276	1.72584	0.03592	1.72584	0.0021	1.72584	0.02484
1.72312	-0.000858052	1.72312	0.000435545	1.72312	-0.00263	1.72762	0.00956	1.72762	0.02438	1.72762	0.02424	1.72762	0.02419	1.72762	0.03793	1.72762	0.00731	1.72762	0.0262
1.7249	-0.000808436	1.7249	0.000372918	1.7249	-0.00277	1.72941	0.01097	1.72941	0.02656	1.72941	0.02179	1.72941	0.02988	1.72941	0.03771	1.72941	0.01079	1.72941	0.02763
1.72668	-0.00052325	1.72668	0.000388944	1.72668	-0.00261	1.73119	0.01226	1.73119	0.02571	1.73119	0.02319	1.73119	0.0306	1.73119	0.03802	1.73119	0.0144	1.73119	0.03089
1.72846	-0.00017778	1.72846	0.000514487	1.72846	-0.00252	1.73298	0.01539	1.73298	0.02496	1.73298	0.02711	1.73298	0.03404	1.73298	0.03468	1.73298	0.0181	1.73298	0.03352
1.73024	0.000138484	1.73024	0.000737242	1.73024	-0.00195	1.73476	0.01903	1.73476	0.02488	1.73476	0.02755	1.73476	0.0317	1.73476	0.03738	1.73476	0.02327	1.73476	0.03663
1.73202	0.000290249	1.73202	0.0014	1.73202	-0.00142	1.73654	0.01884	1.73654	0.02208	1.73654	0.02098	1.73654	0.02918	1.73654	0.03459	1.73654	0.02747	1.73654	0.03654
1.7338	0.000371136	1.7338	0.00193	1.7338	-0.00136	1.73833	0.01868	1.73833	0.02342	1.73833	0.01862	1.73833	0.02553	1.73833	0.03299	1.73833	0.02612	1.73833	0.02876
1.73558	0.000373316	1.73558	0.00209	1.73558	-0.0014	1.74011	0.01814	1.74011	0.02376	1.74011	0.02083	1.74011	0.02016	1.74011	0.03828	1.74011	0.02559	1.74011	0.0221
1.73736	0.000292742	1.73736	0.00221	1.73736	-0.00147	1.7419	0.01683	1.7419	0.02076	1.7419	0.02097	1.7419	0.01586	1.7419	0.03804	1.7419	0.02138	1.7419	0.0176
1.73914	0.000105519	1.73914	0.0023	1.73914	-0.00129	1.74368	0.01389	1.74368	0.01545	1.74368	0.01569	1.74368	0.00946	1.74368	0.04003	1.74368	0.01611	1.74368	0.0124
1.74092	-8.74474e-05	1.74092	0.00269	1.74092	-0.00127	1.74547	0.01259	1.74547	0.01247	1.74547	0.01334	1.74547	0.01055	1.74547	0.04008	1.74547	0.01646	1.74547	0.01244
1.7427	-1.99202e-05	1.7427	0.00263	1.7427	-0.0011	1.74725	0.01434	1.74725	0.00992	1.74725	0.01423	1.74725	0.01152	1.74725	0.03831	1.74725	0.0121	1.74725	0.02218
1.74447	3.56722e-05	1.74447	0.0026	1.74447	-0.001	1.74903	0.01629	1.74903	0.00857	1.74903	0.01129	1.74903	0.01435	1.74903	0.04255	1.74903	0.00884	1.74903	0.02962
1.74625	6.0759e-06	1.74625	0.0028	1.74625	-0.000841653	1.75082	0.01929	1.75082	0.01082	1.75082	0.01163	1.75082	0.01787	1.75082	0.04299	1.75082	0.00808	1.75082	0.02916
1.74803	-5.03156e-05	1.74803	0.00305	1.74803	-0.00089431	1.7526	0.02045	1.7526	0.01176	1.7526	0.00897	1.7526	0.02196	1.7526	0.03855	1.7526	0.01088	1.7526	0.02937
1.74981	-1.0788e-05	1.74981	0.00344	1.74981	-0.000788759	1.75439	0.02265	1.75439	0.01473	1.75439	0.0116	1.75439	0.02354	1.75439	0.03843	1.75439	0.0078	1.75439	0.03254
1.75159	0.000163389	1.75159	0.00366	1.75159	-0.000593236	1.75617	0.02463	1.75617	0.01827	1.75617	0.01069	1.75617	0.02068	1.75617	0.04061	1.75617	0.0032	1.75617	0.02683
1.75337	0.00024786	1.75337	0.00376	1.75337	-0.000519558	1.75795	0.02292	1.75795	0.01897	1.75795	0.00907	1.75795	0.02003	1.75795	0.03938	1.75795	0.000625777	1.75795	0.01915
1.75515	0.000289976	1.75515	0.00406	1.75515	-0.000818312	1.75974	0.02019	1.75974	0.01952	1.75974	0.01024	1.75974	0.01768	1.75974	0.03668	1.75974	0.00614	1.75974	0.01621
1.75693	0.000268402	1.75693	0.00405	1.75693	-0.00111	1.76152	0.0174	1.76152	0.01994	1.76152	0.00424	1.76152	0.01645	1.76152	0.03334	1.76152	0.00735	1.76152	0.01961
1.75871	-3.23048e-05	1.75871	0.00397	1.75871	-0.000812395	1.76331	0.0146	1.76331	0.02145	1.76331	-0.00271	1.76331	0.01483	1.76331	0.03126	1.76331	0.00608	1.76331	0.02172
1.76049	-0.000609083	1.76049	0.004	1.76049	-0.000437501	1.76509	0.01116	1.76509	0.02177	1.76509	-0.00201	1.76509	0.01375	1.76509	0.03066	1.76509	0.00947	1.76509	0.01926
1.76227	-0.000947914	1.76227	0.00414	1.76227	-0.000338027	1.76687	0.0082	1.76687	0.02175	1.76687	-0.00362	1.76687	0.01258	1.76687	0.02813	1.76687	0.0171	1.76687	0.02279
1.76405	-0.000898378	1.76405	0.00419	1.76405	-0.000413065	1.76866	0.00879	1.76866	0.02172	1.76866	-0.00784	1.76866	0.01066	1.76866	0.03165	1.76866	0.0202	1.76866	0.02775
1.76583	-0.000893258	1.76583	0.00392	1.76583	-0.000246991	1.77044	0.00962	1.77044	0.01989	1.77044	-0.00846	1.77044	0.01276	1.77044	0.03687	1.77044	0.01442	1.77044	0.03467
1.76761	-0.000938822	1.76761	0.00362	1.76761	-2.94673e-05	1.77222	0.00931	1.77222	0.02222	1.77222	-0.00251	1.77222	0.01094	1.77222	0.03956	1.77222	0.01877	1.77222	0.03782
1.76938	-0.000992058	1.76938	0.00327	1.76938	0.000250881	1.77401	0.00916	1.77401	0.02277	1.77401	0.00313	1.77401	0.00776	1.77401	0.04326	1.77401	0.02161	1.77401	0.04168
1.77116	-0.000985223	1.77116	0.0031	1.77116	0.000779818	1.77579	0.00638	1.77579	0.02134	1.77579	0.00292	1.77579	0.00588	1.77579	0.04321	1.77579	0.0205	1.77579	0.05581
1.77294	-0.000804913	1.77294	0.0029	1.77294	0.00109	1.77758	0.0065	1.77758	0.0189	1.77758	0.00861	1.77758	0.00334	1.77758	0.03896	1.77758	0.01556	1.77758	0.06008
1.77472	-0.000678579	1.77472	0.00237	1.77472	0.000601597	1.77936	0.00289	1.77936	0.01772	1.77936	0.01565	1.77936	0.00292	1.77936	0.03402	1.77936	0.01061	1.77936	0.05777
1.7765	-0.000746691	1.7765	0.00193	1.7765	-0.000632272	1.78114	0.00058993	1.78114	0.01659	1.78114	0.01663	1.78114	0.00289	1.78114	0.029	1.78114	0.01274	1.78114	0.05476
1.77828	-0.000996946	1.77828	0.00174	1.77828	-0.00138	1.78293	0.0013	1.78293	0.01298	1.78293	0.01153	1.78293	0.00156	1.78293	0.02575	1.78293	0.01063	1.78293	0.04818
1.78006	-0.00116	1.78006	0.00184	1.78006	-0.00122	1.78471	0.00222	1.78471	0.01012	1.78471	0.00958	1.78471	0.00183	1.78471	0.02292	1.78471	0.01189	1.78471	0.04276
1.78184	-0.00127	1.78184	0.00218	1.78184	-0.000504929	1.7865	0.0028	1.7865	0.01014	1.7865	0.00697	1.7865	0.00184	1.7865	0.02014	1.7865	0.00932	1.7865	0.03065
1.78362	-0.00143	1.78362	0.00241	1.78362	-5.83448e-05	1.78828	0.000770221	1.78828	0.01096	1.78828	0.000592506	1.78828	0.00181	1.78828	0.02082	1.78828	0.00824	1.78828	0.02542
1.7854	-0.00142	1.7854	0.00265	1.7854	0.000637789	1.79006	-0.00188	1.79006	0.01213	1.79006	0.000894115	1.79006	-0.00146	1.79006	0.02327	1.79006	0.01094	1.79006	0.0261
1.78718	-0.00162	1.78718	0.0028	1.78718	0.00149	1.79185	-0.00145	1.79185	0.01596	1.79185	0.00128	1.79185	0.000352251	1.79185	0.02337	1.79185	0.0084	1.79185	0.0246
1.78895	-0.00151	1.78895	0.00233	1.78895	0.00244	1.79363	0.000562627	1.79363	0.02009	1.79363	0.00268	1.79363	0.00505	1.79363	0.02166	1.79363	0.00647	1.79363	0.02584
1.79073	-0.00147	1.79073	0.00219	1.79073	0.0032	1.79541	0.00183	1.79541	0.01957	1.79541	-0.000477547	1.79541	0.00857	1.79541	0.01929	1.79541	0.00491	1.79541	0.02655
1.79251	-0.00147	1.79251	0.00249	1.79251	0.00322	1.7972	0.00139	1.7972	0.02142	1.7972	-0.00265	1.7972	0.01382	1.7972	0.01947	1.7972	0.00366	1.7972	0.03305
1.79429	-0.00129	1.79429	0.00281	1.79429	0.00304	1.79898	0.00225	1.79898	0.02446	1.79898	7.43022e-06	1.79898	0.01993	1.79898	0.02061	1.79898	0.00388	1.79898	0.03724
1.79607	-0.00147	1.79607	0.00305	1.79607	0.00255	1.80076	0.0062	1.80076	0.02089	1.80076	-0.0019	1.80076	0.02241	1.80076	0.0185	1.80076	0.0045	1.80076	0.03778
1.79785	-0.00138	1.79785	0.00346	1.79785	0.00208	1.80255	0.00907	1.80255	0.01895	1.80255	-0.00196	1.80255	0.02146	1.80255	0.01558	1.80255	0.01025	1.80255	0.04328
1.79963	-0.00119	1.79963	0.00387	1.79963	0.00182	1.80433	0.00884	1.80433	0.01537	1.80433	0.000872261	1.80433	0.02208	1.80433	0.01585	1.80433	0.01873	1.80433	0.05011
1.80141	-0.00109	1.80141	0.00392	1.80141	0.00154	1.80612	0.01014	1.80612	0.01452	1.80612	0.00188	1.80612	0.02459	1.80612	0.01847	1.80612	0.02038	1.80612	0.05492
1.80319	-0.000954457	1.80319	0.00377	1.80319	0.00204	1.8079	0.01271	1.8079	0.01503	1.8079	0.00623	1.8079	0.0235	1.8079	0.02216	1.8079	0.02421	1.8079	0.05557
1.80497	-0.00102	1.80497	0.00361	1.80497	0.00239	1.80968	0.01189	1.80968	0.01646	1.80968	0.01025	1.80968	0.01618	1.80968	0.02172	1.80968	0.02526	1.80968	0.05533
1.80674	-0.000951731	1.80674	0.00355	1.80674	0.00239	1.81147	0.00955	1.81147	0.02233	1.81147	0.01013	1.81147	0.01026	1.81147	0.02209	1.81147	0.02113	1.81147	0.055
1.80852	-0.000803589	1.80852	0.00315	1.80852	0.00271	1.81325	0.00837	1.81325	0.02331	1.81325	0.01089	1.81325	0.00847	1.81325	0.02603	1.81325	0.01753	1.81325	0.05304
1.8103	-0.000721826	1.8103	0.00275	1.8103	0.00297	1.81503	0.01032	1.81503	0.02629	1.81503	0.00796	1.81503	0.00454	1.81503	0.02776	1.81503	0.01294	1.81503	0.04494
1.81208	-0.000624622	1.81208	0.0029	1.81208	0.00331	1.81682	0.00852	1.81682	0.02813	1.81682	0.0053	1.81682	-0.000733935	1.81682	0.03178	1.81682	0.01163	1.81682	0.04182
1.81386	-0.000489506	1.81386	0.00291	1.81386	0.00342	1.8186	0.00545	1.8186	0.02468	1.8186	0.00271	1.8186	-0.00443	1.8186	0.03403	1.8186	0.01107	1.8186	0.0363
1.81564	-0.000346601	1.81564	0.00285	1.81564	0.00362	1.82038	0.00543	1.82038	0.02199	1.82038	-0.000876412	1.82038	-0.00356	1.82038	0.03842	1.82038	0.00839	1.82038	0.03019
1.81742	-0.000228211	1.81742	0.0032	1.81742	0.00344	1.82217	0.00485	1.82217	0.01833	1.82217	0.000333952	1.82217	-0.00213	1.82217	0.04013	1.82217	0.01612	1.82217	0.02641
1.8192	-0.000232164	1.8192	0.00349	1.8192	0.00324	1.82395	0.00377	1.82395	0.01507	1.82395	1.53009e-05	1.82395	-0.00223	1.82395	0.03582	1.82395	0.01812	1.82395	0.02663
1.82098	-0.000212167	1.82098	0.00355	1.82098	0.00285	1.82573	0.00149	1.82573	0.01416	1.82573	-0.00198	1.82573	0.000934701	1.82573	0.03535	1.82573	0.01831	1.82573	0.02525
1.82275	-0.000199179	1.82275	0.00331	1.82275	0.00229	1.82752	0.00030639	1.82752	0.01572	1.82752	0.000540927	1.82752	0.0054	1.82752	0.03618	1.82752	0.01519	1.82752	0.02123
1.82453	-0.00026001	1.82453	0.00324	1.82453	0.0018	1.8293	0.00088372	1.8293	0.0186	1.8293	0.0077	1.8293	0.00897	1.8293	0.03512	1.8293	0.00758	1.8293	0.02037
1.82631	-0.000353961	1.82631	0.00359	1.82631	0.00159	1.83108	0.00339	1.83108	0.01535	1.83108	0.01038	1.83108	0.01562	1.83108	0.03258	1.83108	0.00473	1.83108	0.02103
1.82809	-0.000350008	1.82809	0.00379	1.82809	0.00159	1.83287	0.00563	1.83287	0.01216	1.83287	0.01082	1.83287	0.02467	1.83287	0.03559	1.83287	0.00147	1.83287	0.02436
1.82987	-0.000350729	1.82987	0.004	1.82987	0.00166	1.83465	0.01036	1.83465	0.01282	1.83465	0.00789	1.83465	0.03055	1.83465	0.03666	1.83465	9.58004e-05	1.83465	0.02458
1.83165	-0.000531546	1.83165	0.00422	1.83165	0.0019	1.83643	0.01132	1.83643	0.01075	1.83643	0.01003	1.83643	0.03369	1.83643	0.03827	1.83643	-0.0031	1.83643	0.02554
1.83343	-0.00054942	1.83343	0.00415	1.83343	0.00185	1.83822	0.01128	1.83822	0.00808	1.83822	0.01179	1.83822	0.02795	1.83822	0.04044	1.83822	-0.006	1.83822	0.02607
1.83521	-0.000459441	1.83521	0.0042	1.83521	0.00155	1.84	0.01253	1.84	0.00765	1.84	0.01041	1.84	0.0226	1.84	0.04093	1.84	0.00171	1.84	0.02663
1.83698	-0.000349931	1.83698	0.00433	1.83698	0.00126	1.84178	0.01253	1.84178	0.00824	1.84178	0.01159	1.84178	0.02116	1.84178	0.04154	1.84178	0.00398	1.84178	0.02495
1.83876	-0.000355693	1.83876	0.00448	1.83876	0.00102	1.84357	0.01175	1.84357	0.00785	1.84357	0.01165	1.84357	0.01886	1.84357	0.0393	1.84357	0.00233	1.84357	0.01831
1.84054	-0.000269201	1.84054	0.00494	1.84054	0.000922845	1.84535	0.00726	1.84535	0.0077	1.84535	0.0101	1.84535	0.01582	1.84535	0.03675	1.84535	0.0065	1.84535	0.01054
1.84232	-1.06316e-05	1.84232	0.00544	1.84232	0.000884057	1.84713	0.00571	1.84713	0.0055	1.84713	0.00724	1.84713	0.01452	1.84713	0.03208	1.84713	0.00993	1.84713	0.00512
1.8441	0.000111089	1.8441	0.00559	1.8441	0.00119	1.84892	0.00422	1.84892	0.00599	1.84892	0.00559	1.84892	0.0187	1.84892	0.02731	1.84892	0.01179	1.84892	0.000371975
1.84588	0.000234403	1.84588	0.00554	1.84588	0.00145	1.8507	-2.00769e-05	1.8507	0.00675	1.8507	0.00249	1.8507	0.02127	1.8507	0.02513	1.8507	0.01435	1.8507	-0.00148
1.84766	0.000506077	1.84766	0.0053	1.84766	0.00171	1.85248	-0.000524989	1.85248	0.00696	1.85248	0.0047	1.85248	0.01656	1.85248	0.02274	1.85248	0.0213	1.85248	-0.00141
1.84943	0.0007265	1.84943	0.00477	1.84943	0.00203	1.85427	-0.000547337	1.85427	0.00743	1.85427	0.00467	1.85427	0.01733	1.85427	0.01829	1.85427	0.02196	1.85427	-0.000476254
1.85121	0.000883949	1.85121	0.00415	1.85121	0.00261	1.85605	-0.00203	1.85605	0.00598	1.85605	0.00572	1.85605	0.01442	1.85605	0.01807	1.85605	0.02135	1.85605	-0.00214
1.85299	0.000719646	1.85299	0.00377	1.85299	0.00316	1.85783	-0.00286	1.85783	0.00364	1.85783	0.00538	1.85783	0.00921	1.85783	0.01895	1.85783	0.01996	1.85783	-0.00133
1.85477	0.000551893	1.85477	0.0037	1.85477	0.00353	1.85962	-0.00327	1.85962	-0.00132	1.85962	0.00399	1.85962	0.00703	1.85962	0.0177	1.85962	0.01985	1.85962	0.00375
1.85655	0.000534624	1.85655	0.00376	1.85655	0.00394	1.8614	-0.00366	1.8614	-0.00427	1.8614	0.0035	1.8614	0.00706	1.8614	0.01695	1.8614	0.02131	1.8614	0.00675
1.85833	0.000540542	1.85833	0.00349	1.85833	0.00448	1.86318	-0.00238	1.86318	-0.0035	1.86318	0.00111	1.86318	0.01095	1.86318	0.01854	1.86318	0.01887	1.86318	0.00861
1.86011	0.000543949	1.86011	0.00324	1.86011	0.00503	1.86497	-0.00264	1.86497	-0.00402	1.86497	0.00342	1.86497	0.0117	1.86497	0.02346	1.86497	0.01758	1.86497	0.00981
1.86188	0.000382216	1.86188	0.00353	1.86188	0.00492	1.86675	-0.00378	1.86675	-0.00313	1.86675	0.00391	1.86675	0.01427	1.86675	0.02415	1.86675	0.01683	1.86675	0.01155
1.86366	0.000360407	1.86366	0.00369	1.86366	0.00464	1.86853	-0.00214	1.86853	-0.000351353	1.86853	-0.00384	1.86853	0.01949	1.86853	0.02933	1.86853	0.01351	1.86853	0.00928
1.86544	0.000420673	1.86544	0.00362	1.86544	0.00407	1.87032	0.000476346	1.87032	0.00212	1.87032	-0.00995	1.87032	0.02216	1.87032	0.0353	1.87032	0.01027	1.87032	0.00815
1.86722	0.000447331	1.86722	0.00374	1.86722	0.00368	1.8721	0.00359	1.8721	0.00401	1.8721	-0.01252	1.8721	0.02138	1.8721	0.03583	1.8721	0.00434	1.8721	0.00541
1.869	0.00053659	1.869	0.00388	1.869	0.00369	1.87388	0.00207	1.87388	0.00426	1.87388	-0.01429	1.87388	0.02092	1.87388	0.03225	1.87388	-0.00161	1.87388	0.00515
1.87078	0.000625791	1.87078	0.00382	1.87078	0.00355	1.87567	0.00312	1.87567	0.00662	1.87567	-0.01897	1.87567	0.01924	1.87567	0.02954	1.87567	-0.00227	1.87567	0.00123
1.87255	0.000642924	1.87255	0.00365	1.87255	0.00361	1.87745	0.00605	1.87745	0.01033	1.87745	-0.02057	1.87745	0.01477	1.87745	0.02677	1.87745	-0.00512	1.87745	0.00040716
1.87433	0.000655601	1.87433	0.00343	1.87433	0.00393	1.87923	0.0053	1.87923	0.01431	1.87923	-0.0153	1.87923	0.0131	1.87923	0.0217	1.87923	-0.00241	1.87923	0.00396
1.87611	0.00075378	1.87611	0.00329	1.87611	0.00412	1.88101	0.00604	1.88101	0.01744	1.88101	-0.00956	1.88101	0.00809	1.88101	0.02142	1.88101	0.000566272	1.88101	0.0051
1.87789	0.00105	1.87789	0.00328	1.87789	0.00406	1.8828	0.00638	1.8828	0.01842	1.8828	-0.00751	1.8828	0.00933	1.8828	0.01913	1.8828	-0.00104	1.8828	0.00508
1.87967	0.00117	1.87967	0.00373	1.87967	0.00367	1.88458	0.00814	1.88458	0.01968	1.88458	-0.00246	1.88458	0.01206	1.88458	0.0179	1.88458	0.00145	1.88458	0.01112
1.88145	0.00118	1.88145	0.00415	1.88145	0.00334	1.88636	0.00814	1.88636	0.0229	1.88636	-0.00104	1.88636	0.01399	1.88636	0.01873	1.88636	0.00376	1.88636	0.00989
1.88322	0.00116	1.88322	0.00472	1.88322	0.00332	1.88815	0.00439	1.88815	0.02294	1.88815	-0.00277	1.88815	0.0212	1.88815	0.01794	1.88815	0.0074	1.88815	0.01275
1.885	0.00127	1.885	0.00514	1.885	0.00321	1.88993	0.0024	1.88993	0.02312	1.88993	-0.00135	1.88993	0.0231	1.88993	0.015	1.88993	0.00776	1.88993	0.01971
1.88678	0.0013	1.88678	0.00521	1.88678	0.00352	1.89171	-0.000530702	1.89171	0.0212	1.89171	-0.00767	1.89171	0.02653	1.89171	0.01244	1.89171	0.00862	1.89171	0.02208
1.88856	0.00122	1.88856	0.00513	1.88856	0.00415	1.8935	0.000322271	1.8935	0.01972	1.8935	-0.01277	1.8935	0.02732	1.8935	0.01283	1.8935	0.01545	1.8935	0.02504
1.89034	0.00119	1.89034	0.00521	1.89034	0.0047	1.89528	-0.000408214	1.89528	0.01947	1.89528	-0.01579	1.89528	0.02594	1.89528	0.01412	1.89528	0.01974	1.89528	0.02933
1.89212	0.00123	1.89212	0.00533	1.89212	0.0051	1.89706	0.000598079	1.89706	0.01692	1.89706	-0.0146	1.89706	0.02215	1.89706	0.01018	1.89706	0.02325	1.89706	0.03475
1.89389	0.0012	1.89389	0.00524	1.89389	0.00537	1.89884	0.00488	1.89884	0.01502	1.89884	-0.01781	1.89884	0.01823	1.89884	0.00791	1.89884	0.02254	1.89884	0.03673
1.89567	0.00104	1.89567	0.00514	1.89567	0.00563	1.90063	0.00581	1.90063	0.01349	1.90063	-0.02045	1.90063	0.02041	1.90063	0.01448	1.90063	0.02478	1.90063	0.03687
1.89745	0.000992155	1.89745	0.00516	1.89745	0.00577	1.90241	0.00646	1.90241	0.01144	1.90241	-0.01713	1.90241	0.02082	1.90241	0.01814	1.90241	0.02534	1.90241	0.03869
1.89923	0.00108	1.89923	0.00516	1.89923	0.00532	1.90419	0.00512	1.90419	0.01104	1.90419	-0.01206	1.90419	0.01665	1.90419	0.02182	1.90419	0.02531	1.90419	0.04664
1.90101	0.000925094	1.90101	0.00528	1.90101	0.005	1.90598	0.00417	1.90598	0.00509	1.90598	-0.00765	1.90598	0.01275	1.90598	0.02924	1.90598	0.02585	1.90598	0.04916
1.90279	0.000982848	1.90279	0.00528	1.90279	0.0049	1.90776	0.00279	1.90776	0.00204	1.90776	-0.00431	1.90776	0.01543	1.90776	0.03703	1.90776	0.02332	1.90776	0.05178
1.90456	0.00137	1.90456	0.0054	1.90456	0.00466	1.90954	0.00174	1.90954	0.00301	1.90954	0.00304	1.90954	0.02389	1.90954	0.04074	1.90954	0.01931	1.90954	0.05901
1.90634	0.00167	1.90634	0.0056	1.90634	0.0043	1.91132	0.00124	1.91132	0.00289	1.91132	0.00843	1.91132	0.02475	1.91132	0.04123	1.91132	0.01802	1.91132	0.06679
1.90812	0.00177	1.90812	0.0057	1.90812	0.00425	1.91311	0.000660504	1.91311	0.00274	1.91311	0.01361	1.91311	0.02605	1.91311	0.04034	1.91311	0.01636	1.91311	0.07076
1.9099	0.00175	1.9099	0.00581	1.9099	0.00456	1.91489	0.00279	1.91489	0.00108	1.91489	0.02103	1.91489	0.03213	1.91489	0.04197	1.91489	0.01507	1.91489	0.07316
1.91168	0.00176	1.91168	0.00573	1.91168	0.00534	1.91667	0.00659	1.91667	0.00168	1.91667	0.02981	1.91667	0.03964	1.91667	0.04195	1.91667	0.01294	1.91667	0.07726
1.91345	0.0019	1.91345	0.00575	1.91345	0.00599	1.91845	0.00979	1.91845	0.00519	1.91845	0.02702	1.91845	0.03962	1.91845	0.04326	1.91845	0.01576	1.91845	0.08556
1.91523	0.00207	1.91523	0.00583	1.91523	0.00633	1.92024	0.01138	1.92024	0.00325	1.92024	0.02454	1.92024	0.02908	1.92024	0.04461	1.92024	0.02165	1.92024	0.08703
1.91701	0.00235	1.91701	0.0058	1.91701	0.00657	1.92202	0.01243	1.92202	0.000896917	1.92202	0.02146	1.92202	0.01964	1.92202	0.04286	1.92202	0.02428	1.92202	0.09258
1.91879	0.00252	1.91879	0.00572	1.91879	0.00686	1.9238	0.01248	1.9238	0.00137	1.9238	0.01595	1.9238	0.01549	1.9238	0.04302	1.9238	0.02671	1.9238	0.09278
1.92057	0.00244	1.92057	0.00578	1.92057	0.00723	1.92559	0.01156	1.92559	0.00269	1.92559	0.00864	1.92559	0.00943	1.92559	0.04016	1.92559	0.02698	1.92559	0.08976
1.92234	0.00241	1.92234	0.00595	1.92234	0.00733	1.92737	0.01092	1.92737	0.00462	1.92737	-0.00616	1.92737	0.000196658	1.92737	0.03854	1.92737	0.02989	1.92737	0.08383
1.92412	0.00237	1.92412	0.00606	1.92412	0.00708	1.92915	0.01154	1.92915	0.00701	1.92915	-0.0111	1.92915	-0.00484	1.92915	0.03678	1.92915	0.03117	1.92915	0.08144
1.9259	0.00227	1.9259	0.00629	1.9259	0.00716	1.93093	0.01266	1.93093	0.01133	1.93093	-0.01235	1.93093	-0.00146	1.93093	0.03738	1.93093	0.0338	1.93093	0.07885
1.92768	0.00221	1.92768	0.00639	1.92768	0.00723	1.93272	0.01183	1.93272	0.01926	1.93272	-0.01099	1.93272	0.00261	1.93272	0.03489	1.93272	0.03705	1.93272	0.07995
1.92946	0.00222	1.92946	0.00664	1.92946	0.00716	1.9345	0.01212	1.9345	0.02084	1.9345	-0.00853	1.9345	0.00534	1.9345	0.03278	1.9345	0.03932	1.9345	0.08325
1.93123	0.00222	1.93123	0.00687	1.93123	0.00743	1.93628	0.01355	1.93628	0.01982	1.93628	-0.00949	1.93628	0.00819	1.93628	0.03158	1.93628	0.04376	1.93628	0.08683
1.93301	0.00232	1.93301	0.0071	1.93301	0.00772	1.93806	0.01285	1.93806	0.02032	1.93806	-0.00228	1.93806	0.01585	1.93806	0.02982	1.93806	0.04747	1.93806	0.09142
1.93479	0.00251	1.93479	0.00746	1.93479	0.00807	1.93985	0.01107	1.93985	0.02118	1.93985	-0.000421159	1.93985	0.02031	1.93985	0.02817	1.93985	0.05249	1.93985	0.09372
1.93657	0.00261	1.93657	0.00761	1.93657	0.00826	1.94163	0.01512	1.94163	0.01814	1.94163	-0.00492	1.94163	0.02156	1.94163	0.0253	1.94163	0.05203	1.94163	0.09441
1.93835	0.00273	1.93835	0.00771	1.93835	0.00827	1.94341	0.01997	1.94341	0.01005	1.94341	-0.00633	1.94341	0.02347	1.94341	0.02613	1.94341	0.05111	1.94341	0.09467
1.94012	0.00305	1.94012	0.00775	1.94012	0.00807	1.94519	0.02222	1.94519	0.00664	1.94519	-0.00785	1.94519	0.02373	1.94519	0.02663	1.94519	0.05325	1.94519	0.09651
1.9419	0.00329	1.9419	0.00764	1.9419	0.00773	1.94698	0.02185	1.94698	0.00581	1.94698	-0.0093	1.94698	0.02356	1.94698	0.02946	1.94698	0.05399	1.94698	0.09562
1.94368	0.00363	1.94368	0.00795	1.94368	0.00752	1.94876	0.02236	1.94876	0.00325	1.94876	-0.01729	1.94876	0.02335	1.94876	0.03193	1.94876	0.05772	1.94876	0.09162
1.94546	0.00403	1.94546	0.00822	1.94546	0.00764	1.95054	0.02208	1.95054	-0.00216	1.95054	-0.02344	1.95054	0.02206	1.95054	0.03433	1.95054	0.05717	1.95054	0.08895
1.94723	0.00443	1.94723	0.00846	1.94723	0.00794	1.95232	0.0174	1.95232	-0.00384	1.95232	-0.0222	1.95232	0.02047	1.95232	0.03402	1.95232	0.05291	1.95232	0.08884
1.94901	0.0048	1.94901	0.00876	1.94901	0.00827	1.95411	0.01325	1.95411	-0.00335	1.95411	-0.01938	1.95411	0.02123	1.95411	0.03458	1.95411	0.05507	1.95411	0.09036
1.95079	0.00497	1.95079	0.00898	1.95079	0.00862	1.95589	0.00917	1.95589	-0.0032	1.95589	-0.01341	1.95589	0.01817	1.95589	0.03664	1.95589	0.05726	1.95589	0.08513
1.95257	0.00534	1.95257	0.00945	1.95257	0.00891	1.95767	0.01061	1.95767	-0.00377	1.95767	-0.0106	1.95767	0.01142	1.95767	0.03229	1.95767	0.0547	1.95767	0.07925
1.95435	0.00593	1.95435	0.00982	1.95435	0.00921	1.95945	0.01291	1.95945	0.00143	1.95945	-0.00439	1.95945	0.00916	1.95945	0.02969	1.95945	0.05159	1.95945	0.07442
1.95612	0.00649	1.95612	0.01016	1.95612	0.00977	1.96124	0.01175	1.96124	0.00467	1.96124	0.00429	1.96124	0.0083	1.96124	0.03136	1.96124	0.05334	1.96124	0.06784
1.9579	0.00684	1.9579	0.01037	1.9579	0.0105	1.96302	0.01196	1.96302	0.00791	1.96302	0.0097	1.96302	0.00944	1.96302	0.03483	1.96302	0.0506	1.96302	0.05973
1.95968	0.00705	1.95968	0.01048	1.95968	0.01124	1.9648	0.01041	1.9648	0.00825	1.9648	0.00907	1.9648	0.00792	1.9648	0.03598	1.9648	0.04573	1.9648	0.05467
1.96146	0.00745	1.96146	0.01054	1.96146	0.0115	1.96658	0.01316	1.96658	0.00899	1.96658	0.00664	1.96658	0.01068	1.96658	0.03687	1.96658	0.04199	1.96658	0.05232
1.96323	0.00796	1.96323	0.01078	1.96323	0.01189	1.96836	0.01456	1.96836	0.01003	1.96836	0.00803	1.96836	0.01599	1.96836	0.0391	1.96836	0.039	1.96836	0.04887
1.96501	0.00876	1.96501	0.01103	1.96501	0.01243	1.97015	0.01379	1.97015	0.00718	1.97015	0.00599	1.97015	0.01803	1.97015	0.03934	1.97015	0.03475	1.97015	0.04886
1.96679	0.0096	1.96679	0.01134	1.96679	0.01278	1.97193	0.01665	1.97193	0.00998	1.97193	-0.00398	1.97193	0.01339	1.97193	0.0371	1.97193	0.03204	1.97193	0.04863
1.96857	0.01057	1.96857	0.01184	1.96857	0.01346	1.97371	0.01676	1.97371	0.01308	1.97371	-0.00939	1.97371	0.01394	1.97371	0.03797	1.97371	0.0331	1.97371	0.04463
1.97034	0.01195	1.97034	0.0125	1.97034	0.01429	1.97549	0.01555	1.97549	0.01418	1.97549	-0.01264	1.97549	0.01158	1.97549	0.03566	1.97549	0.03303	1.97549	0.04155
1.97212	0.01356	1.97212	0.01322	1.97212	0.01519	1.97728	0.01453	1.97728	0.01322	1.97728	-0.01608	1.97728	0.0056	1.97728	0.032	1.97728	0.0345	1.97728	0.04153
1.9739	0.01569	1.9739	0.01391	1.9739	0.01578	1.97906	0.0129	1.97906	0.01407	1.97906	-0.01755	1.97906	0.00589	1.97906	0.03061	1.97906	0.03771	1.97906	0.04149
1.97568	0.0184	1.97568	0.01453	1.97568	0.01658	1.98084	0.01152	1.98084	0.01366	1.98084	-0.01038	1.98084	0.00788	1.98084	0.02749	1.98084	0.04135	1.98084	0.03868
1.97745	0.02205	1.97745	0.01558	1.97745	0.01738	1.98262	0.01109	1.98262	0.0109	1.98262	-0.00154	1.98262	0.01036	1.98262	0.02273	1.98262	0.0372	1.98262	0.03724
1.97923	0.02646	1.97923	0.0168	1.97923	0.01807	1.9844	0.00906	1.9844	0.00519	1.9844	0.00369	1.9844	0.0147	1.9844	0.01836	1.9844	0.03859	1.9844	0.04275
1.98101	0.03254	1.98101	0.01796	1.98101	0.01854	1.98619	0.00596	1.98619	0.00252	1.98619	0.00627	1.98619	0.01774	1.98619	0.01724	1.98619	0.04155	1.98619	0.04363
1.98279	0.04148	1.98279	0.01969	1.98279	0.01916	1.98797	0.0051	1.98797	0.00346	1.98797	0.01011	1.98797	0.02001	1.98797	0.01012	1.98797	0.0397	1.98797	0.04076
1.98456	0.05413	1.98456	0.02134	1.98456	0.02006	1.98975	0.00299	1.98975	0.00193	1.98975	0.01179	1.98975	0.02492	1.98975	0.00786	1.98975	0.03786	1.98975	0.04338
1.98634	0.07123	1.98634	0.02341	1.98634	0.02109	1.99153	0.000818696	1.99153	0.00152	1.99153	0.01095	1.99153	0.02664	1.99153	0.01029	1.99153	0.03356	1.99153	0.04499
1.98812	0.09775	1.98812	0.02635	1.98812	0.02271	1.99332	0.000996633	1.99332	0.00314	1.99332	0.01493	1.99332	0.02686	1.99332	0.01049	1.99332	0.03313	1.99332	0.05064
1.9899	0.13551	1.9899	0.03003	1.9899	0.02459	1.9951	0.00322	1.9951	0.0051	1.9951	0.01798	1.9951	0.0295	1.9951	0.01463	1.9951	0.02885	1.9951	0.05255
1.99167	0.18497	1.99167	0.03441	1.99167	0.02663	1.99688	0.00466	1.99688	0.00641	1.99688	0.02178	1.99688	0.02318	1.99688	0.02123	1.99688	0.02773	1.99688	0.04826
1.99345	0.25208	1.99345	0.04014	1.99345	0.02934	1.99866	0.00521	1.99866	0.00548	1.99866	0.0214	1.99866	0.02075	1.99866	0.02763	1.99866	0.02372	1.99866	0.04876
1.99523	0.34003	1.99523	0.04855	1.99523	0.0328	2.00044	0.00757	2.00044	0.00551	2.00044	0.01879	2.00044	0.01495	2.00044	0.0299	2.00044	0.01907	2.00044	0.05217
1.99701	0.43396	1.99701	0.0595	1.99701	0.03718	2.00223	0.01042	2.00223	0.00882	2.00223	0.01561	2.00223	0.00728	2.00223	0.03077	2.00223	0.02013	2.00223	0.05437
1.99878	0.5303	1.99878	0.075	1.99878	0.04273	2.00401	0.0143	2.00401	0.00531	2.00401	0.01217	2.00401	0.00576	2.00401	0.03217	2.00401	0.02092	2.00401	0.04932
2.00056	0.61314	2.00056	0.09797	2.00056	0.04973	2.00579	0.01662	2.00579	0.00223	2.00579	0.00536	2.00579	0.00144	2.00579	0.02818	2.00579	0.01941	2.00579	0.04937
2.00234	0.66014	2.00234	0.12802	2.00234	0.0593	2.00757	0.01776	2.00757	-0.00115	2.00757	-0.00373	2.00757	0.00417	2.00757	0.02134	2.00757	0.01606	2.00757	0.04677
2.00412	0.6627	2.00412	0.1684	2.00412	0.07123	2.00935	0.02013	2.00935	-0.0066	2.00935	-0.00386	2.00935	0.00957	2.00935	0.01781	2.00935	0.00881	2.00935	0.03775
2.00589	0.61557	2.00589	0.22748	2.00589	0.08791	2.01114	0.02152	2.01114	-0.00685	2.01114	0.000349689	2.01114	0.01312	2.01114	0.01662	2.01114	0.00658	2.01114	0.0327
2.00767	0.53841	2.00767	0.2984	2.00767	0.11165	2.01292	0.02326	2.01292	-0.0103	2.01292	0.00256	2.01292	0.01374	2.01292	0.01487	2.01292	0.00436	2.01292	0.03
2.00945	0.4453	2.00945	0.38224	2.00945	0.14317	2.0147	0.02181	2.0147	-0.0092	2.0147	0.00392	2.0147	0.01665	2.0147	0.01556	2.0147	-0.000592653	2.0147	0.03305
2.01122	0.34587	2.01122	0.48466	2.01122	0.18527	2.01648	0.01979	2.01648	-0.0082	2.01648	0.005	2.01648	0.01972	2.01648	0.01836	2.01648	1.36876e-05	2.01648	0.03415
2.013	0.26051	2.013	0.58322	2.013	0.24006	2.01826	0.01702	2.01826	-0.00668	2.01826	0.00579	2.01826	0.0232	2.01826	0.02058	2.01826	0.00362	2.01826	0.03352
2.01478	0.19305	2.01478	0.66628	2.01478	0.30996	2.02004	0.01342	2.02004	-0.00522	2.02004	0.00465	2.02004	0.02607	2.02004	0.01781	2.02004	0.00508	2.02004	0.03937
2.01656	0.14001	2.01656	0.72082	2.01656	0.39631	2.02183	0.01038	2.02183	-0.0045	2.02183	0.00213	2.02183	0.02386	2.02183	0.01395	2.02183	0.00481	2.02183	0.0388
2.01833	0.10098	2.01833	0.73538	2.01833	0.50031	2.02361	0.00575	2.02361	0.00043067	2.02361	-0.000166541	2.02361	0.02504	2.02361	0.00925	2.02361	0.00357	2.02361	0.04
2.02011	0.07393	2.02011	0.70929	2.02011	0.60956	2.02539	0.00387	2.02539	0.00299	2.02539	0.000440173	2.02539	0.02237	2.02539	0.00972	2.02539	0.00756	2.02539	0.04363
2.02189	0.0542	2.02189	0.64296	2.02189	0.71785	2.02717	0.00437	2.02717	0.00228	2.02717	0.00707	2.02717	0.02284	2.02717	0.01134	2.02717	0.01315	2.02717	0.04232
2.02367	0.04063	2.02367	0.55317	2.02367	0.80594	2.02895	0.00925	2.02895	0.00353	2.02895	0.01505	2.02895	0.02484	2.02895	0.01265	2.02895	0.01318	2.02895	0.04316
2.02544	0.03164	2.02544	0.4599	2.02544	0.86089	2.03074	0.01391	2.03074	0.00941	2.03074	0.02282	2.03074	0.02117	2.03074	0.01666	2.03074	0.01429	2.03074	0.0388
2.02722	0.02525	2.02722	0.36848	2.02722	0.8732	2.03252	0.02241	2.03252	0.01082	2.03252	0.02673	2.03252	0.0243	2.03252	0.01867	2.03252	0.02103	2.03252	0.03347
2.029	0.02037	2.029	0.28562	2.029	0.83765	2.0343	0.02828	2.0343	0.01016	2.0343	0.02787	2.0343	0.02576	2.0343	0.01811	2.0343	0.02076	2.0343	0.03265
2.03077	0.01694	2.03077	0.21987	2.03077	0.76478	2.03608	0.03413	2.03608	0.01157	2.03608	0.02474	2.03608	0.02764	2.03608	0.01593	2.03608	0.02031	2.03608	0.02892
2.03255	0.01448	2.03255	0.1682	2.03255	0.66625	2.03786	0.04405	2.03786	0.0142	2.03786	0.01844	2.03786	0.02817	2.03786	0.01175	2.03786	0.02022	2.03786	0.0251
2.03433	0.01263	2.03433	0.12706	2.03433	0.55948	2.03964	0.04869	2.03964	0.01926	2.03964	0.01258	2.03964	0.02538	2.03964	0.00847	2.03964	0.01528	2.03964	0.01967
2.0361	0.01118	2.0361	0.09772	2.0361	0.45648	2.04143	0.05478	2.04143	0.02166	2.04143	0.01198	2.04143	0.02756	2.04143	0.00585	2.04143	0.00996	2.04143	0.01429
2.03788	0.01009	2.03788	0.07637	2.03788	0.36455	2.04321	0.06814	2.04321	0.02608	2.04321	0.01628	2.04321	0.02989	2.04321	0.00811	2.04321	0.00852	2.04321	0.00907
2.03966	0.00919	2.03966	0.05979	2.03966	0.28702	2.04499	0.0898	2.04499	0.032	2.04499	0.02562	2.04499	0.02999	2.04499	0.01327	2.04499	0.01007	2.04499	0.00419
2.04144	0.00848	2.04144	0.04801	2.04144	0.22432	2.04677	0.11825	2.04677	0.04385	2.04677	0.03768	2.04677	0.02991	2.04677	0.01906	2.04677	0.00726	2.04677	0.000600032
2.04321	0.00783	2.04321	0.03939	2.04321	0.17503	2.04855	0.16556	2.04855	0.06878	2.04855	0.05417	2.04855	0.02946	2.04855	0.02591	2.04855	0.01035	2.04855	0.00306
2.04499	0.00713	2.04499	0.03269	2.04499	0.13658	2.05033	0.23334	2.05033	0.10251	2.05033	0.08025	2.05033	0.02269	2.05033	0.03213	2.05033	0.01756	2.05033	0.00665
2.04677	0.00664	2.04677	0.02777	2.04677	0.10846	2.05212	0.30907	2.05212	0.14528	2.05212	0.11219	2.05212	0.01525	2.05212	0.03721	2.05212	0.01882	2.05212	0.00482
2.04854	0.00626	2.04854	0.02407	2.04854	0.08725	2.0539	0.39288	2.0539	0.2087	2.0539	0.15798	2.0539	0.01175	2.0539	0.04148	2.0539	0.0201	2.0539	0.00812
2.05032	0.00588	2.05032	0.02125	2.05032	0.07112	2.05568	0.48347	2.05568	0.28921	2.05568	0.2192	2.05568	0.01459	2.05568	0.04388	2.05568	0.02315	2.05568	0.00817
2.0521	0.0053	2.0521	0.01926	2.0521	0.05887	2.05746	0.56102	2.05746	0.38328	2.05746	0.29888	2.05746	0.01731	2.05746	0.04372	2.05746	0.02311	2.05746	0.00926
2.05387	0.00472	2.05387	0.01761	2.05387	0.04957	2.05924	0.60616	2.05924	0.49471	2.05924	0.41051	2.05924	0.01779	2.05924	0.04215	2.05924	0.01355	2.05924	0.0082
2.05565	0.00425	2.05565	0.0159	2.05565	0.04233	2.06102	0.62286	2.06102	0.61266	2.06102	0.52498	2.06102	0.02951	2.06102	0.04113	2.06102	0.01148	2.06102	0.00525
2.05743	0.0039	2.05743	0.01436	2.05743	0.03644	2.0628	0.61391	2.0628	0.71336	2.0628	0.64939	2.0628	0.03815	2.0628	0.0472	2.0628	0.01564	2.0628	0.00606
2.0592	0.00384	2.0592	0.01328	2.0592	0.03186	2.06459	0.57149	2.06459	0.78198	2.06459	0.76465	2.06459	0.04277	2.06459	0.04499	2.06459	0.01389	2.06459	0.00721
2.06098	0.00404	2.06098	0.0127	2.06098	0.02808	2.06637	0.50092	2.06637	0.80422	2.06637	0.86092	2.06637	0.04841	2.06637	0.04147	2.06637	0.00653	2.06637	0.0072
2.06276	0.00424	2.06276	0.01188	2.06276	0.02495	2.06815	0.42579	2.06815	0.78501	2.06815	0.92129	2.06815	0.05262	2.06815	0.04024	2.06815	0.00432	2.06815	0.00702
2.06454	0.00432	2.06454	0.01128	2.06454	0.02247	2.06993	0.35345	2.06993	0.72262	2.06993	0.93678	2.06993	0.05808	2.06993	0.03784	2.06993	0.00846	2.06993	0.00767
2.06631	0.00422	2.06631	0.01103	2.06631	0.02004	2.07171	0.27849	2.07171	0.63125	2.07171	0.9181	2.07171	0.06617	2.07171	0.0423	2.07171	0.00933	2.07171	0.00433
2.06809	0.00407	2.06809	0.01069	2.06809	0.0181	2.07349	0.21017	2.07349	0.53152	2.07349	0.85919	2.07349	0.07631	2.07349	0.04595	2.07349	0.00917	2.07349	0.00481
2.06987	0.00377	2.06987	0.01023	2.06987	0.01693	2.07527	0.15835	2.07527	0.43165	2.07527	0.76335	2.07527	0.08976	2.07527	0.05504	2.07527	0.00884	2.07527	0.00518
2.07164	0.00352	2.07164	0.00962	2.07164	0.01639	2.07706	0.12078	2.07706	0.34379	2.07706	0.66406	2.07706	0.11324	2.07706	0.06694	2.07706	0.01262	2.07706	0.00786
2.07342	0.00332	2.07342	0.00903	2.07342	0.01568	2.07884	0.09509	2.07884	0.27146	2.07884	0.56062	2.07884	0.14558	2.07884	0.07467	2.07884	0.02026	2.07884	0.01377
2.0752	0.00294	2.0752	0.00855	2.0752	0.01476	2.08062	0.07457	2.08062	0.21425	2.08062	0.45585	2.08062	0.18771	2.08062	0.08976	2.08062	0.02578	2.08062	0.01928
2.07697	0.00251	2.07697	0.00805	2.07697	0.01402	2.0824	0.05568	2.0824	0.16682	2.0824	0.3668	2.0824	0.25258	2.0824	0.10587	2.0824	0.03265	2.0824	0.02302
2.07875	0.0023	2.07875	0.00772	2.07875	0.01334	2.08418	0.04202	2.08418	0.12753	2.08418	0.28196	2.08418	0.32484	2.08418	0.12079	2.08418	0.0387	2.08418	0.02017
2.08053	0.00225	2.08053	0.00749	2.08053	0.01276	2.08596	0.03336	2.08596	0.099	2.08596	0.21991	2.08596	0.41293	2.08596	0.14168	2.08596	0.05065	2.08596	0.01895
2.0823	0.00229	2.0823	0.00694	2.0823	0.01236	2.08774	0.02428	2.08774	0.07661	2.08774	0.16877	2.08774	0.51916	2.08774	0.17588	2.08774	0.06296	2.08774	0.02018
2.08408	0.00219	2.08408	0.00647	2.08408	0.01199	2.08952	0.01623	2.08952	0.06024	2.08952	0.12552	2.08952	0.61989	2.08952	0.21759	2.08952	0.07497	2.08952	0.02217
2.08586	0.00214	2.08586	0.00639	2.08586	0.0117	2.09131	0.01507	2.09131	0.04663	2.09131	0.09341	2.09131	0.72356	2.09131	0.26882	2.09131	0.08946	2.09131	0.02909
2.08763	0.00224	2.08763	0.00612	2.08763	0.01123	2.09309	0.01096	2.09309	0.03727	2.09309	0.0627	2.09309	0.83317	2.09309	0.34014	2.09309	0.10926	2.09309	0.04155
2.08941	0.00222	2.08941	0.00594	2.08941	0.0108	2.09487	0.00623	2.09487	0.03617	2.09487	0.04083	2.09487	0.89884	2.09487	0.42468	2.09487	0.13508	2.09487	0.05556
2.09119	0.0023	2.09119	0.00611	2.09119	0.01019	2.09665	0.00256	2.09665	0.03305	2.09665	0.0229	2.09665	0.9233	2.09665	0.51177	2.09665	0.17132	2.09665	0.07362
2.09296	0.00245	2.09296	0.00633	2.09296	0.00967	2.09843	0.00158	2.09843	0.02794	2.09843	0.00793	2.09843	0.90995	2.09843	0.6187	2.09843	0.21696	2.09843	0.09435
2.09474	0.00254	2.09474	0.00633	2.09474	0.00913	2.10021	-0.000347725	2.10021	0.02569	2.10021	0.00292	2.10021	0.8652	2.10021	0.72559	2.10021	0.2704	2.10021	0.1146
2.09651	0.00255	2.09651	0.00633	2.09651	0.00869	2.10199	-0.00498	2.10199	0.02175	2.10199	-0.00448	2.10199	0.79459	2.10199	0.82332	2.10199	0.33956	2.10199	0.14094
2.09829	0.00249	2.09829	0.00651	2.09829	0.00865	2.10377	-0.0052	2.10377	0.01711	2.10377	-0.00695	2.10377	0.69696	2.10377	0.91481	2.10377	0.41968	2.10377	0.17415
2.10007	0.0025	2.10007	0.00661	2.10007	0.00846	2.10556	-0.00595	2.10556	0.01282	2.10556	-0.00802	2.10556	0.60489	2.10556	0.97593	2.10556	0.51636	2.10556	0.22246
2.10184	0.00248	2.10184	0.00628	2.10184	0.00821	2.10734	-0.00567	2.10734	0.00991	2.10734	-0.00844	2.10734	0.51557	2.10734	1	2.10734	0.62724	2.10734	0.28176
2.10362	0.00233	2.10362	0.00579	2.10362	0.00799	2.10912	-0.00491	2.10912	0.00906	2.10912	-0.00474	2.10912	0.42708	2.10912	0.97392	2.10912	0.72644	2.10912	0.34897
2.1054	0.00206	2.1054	0.00558	2.1054	0.00798	2.1109	-0.00644	2.1109	0.00752	2.1109	-0.00721	2.1109	0.35644	2.1109	0.91394	2.1109	0.82872	2.1109	0.43549
2.10717	0.00192	2.10717	0.00542	2.10717	0.00786	2.11268	-0.00663	2.11268	0.00856	2.11268	-0.00633	2.11268	0.29995	2.11268	0.8377	2.11268	0.93423	2.11268	0.53785
2.10895	0.00183	2.10895	0.00547	2.10895	0.00779	2.11446	-0.00764	2.11446	0.00688	2.11446	-0.00551	2.11446	0.23311	2.11446	0.73113	2.11446	0.98763	2.11446	0.63391
2.11073	0.00183	2.11073	0.00551	2.11073	0.00778	2.11624	-0.01119	2.11624	0.00421	2.11624	-0.00983	2.11624	0.18487	2.11624	0.61845	2.11624	1	2.11624	0.73354
2.1125	0.00198	2.1125	0.00562	2.1125	0.00792	2.11802	-0.01265	2.11802	0.00672	2.11802	-0.01214	2.11802	0.15876	2.11802	0.52627	2.11802	0.98514	2.11802	0.84005
2.11428	0.00206	2.11428	0.00569	2.11428	0.0077	2.1198	-0.01415	2.1198	0.00911	2.1198	-0.01735	2.1198	0.13276	2.1198	0.43916	2.1198	0.93775	2.1198	0.92117
2.11606	0.002	2.11606	0.00555	2.11606	0.00719	2.12158	-0.01281	2.12158	0.00619	2.12158	-0.02207	2.12158	0.1079	2.12158	0.36664	2.12158	0.85984	2.12158	0.97715
2.11783	0.00185	2.11783	0.00516	2.11783	0.00686	2.12337	-0.01272	2.12337	0.00385	2.12337	-0.0286	2.12337	0.09333	2.12337	0.30672	2.12337	0.75284	2.12337	1
2.11961	0.00176	2.11961	0.00499	2.11961	0.00692	2.12515	-0.01263	2.12515	0.0038	2.12515	-0.03936	2.12515	0.07861	2.12515	0.25564	2.12515	0.6609	2.12515	0.99247
2.12138	0.00163	2.12138	0.00506	2.12138	0.00757	2.12693	-0.00871	2.12693	0.003	2.12693	-0.03996	2.12693	0.063	2.12693	0.21128	2.12693	0.56896	2.12693	0.94758
2.12316	0.00138	2.12316	0.0051	2.12316	0.008	2.12871	-0.00691	2.12871	0.00239	2.12871	-0.0384	2.12871	0.05429	2.12871	0.17409	2.12871	0.46792	2.12871	0.86979
2.12494	0.00122	2.12494	0.00506	2.12494	0.00789	2.13049	-0.00805	2.13049	0.00030966	2.13049	-0.03744	2.13049	0.05098	2.13049	0.14649	2.13049	0.38837	2.13049	0.78184
2.12671	0.00113	2.12671	0.00511	2.12671	0.00748	2.13227	-0.00615	2.13227	-0.00226	2.13227	-0.03473	2.13227	0.04992	2.13227	0.12893	2.13227	0.32188	2.13227	0.68195
2.12849	0.00096692	2.12849	0.00537	2.12849	0.00698	2.13405	-0.0044	2.13405	-0.00371	2.13405	-0.03108	2.13405	0.04323	2.13405	0.11697	2.13405	0.25924	2.13405	0.57524
2.13026	0.000852756	2.13026	0.00516	2.13026	0.00692	2.13583	-0.00387	2.13583	-0.00578	2.13583	-0.02716	2.13583	0.03805	2.13583	0.10525	2.13583	0.20699	2.13583	0.48564
2.13204	0.000874292	2.13204	0.00497	2.13204	0.007	2.13761	-0.00674	2.13761	-0.00974	2.13761	-0.02558	2.13761	0.0369	2.13761	0.09319	2.13761	0.17022	2.13761	0.40575
2.13382	0.00118	2.13382	0.00524	2.13382	0.00706	2.13939	-0.00792	2.13939	-0.01243	2.13939	-0.02774	2.13939	0.03141	2.13939	0.08377	2.13939	0.13913	2.13939	0.33062
2.13559	0.00142	2.13559	0.00529	2.13559	0.00699	2.14117	-0.00865	2.14117	-0.01374	2.14117	-0.03106	2.14117	0.02859	2.14117	0.07443	2.14117	0.1112	2.14117	0.27006
2.13737	0.00152	2.13737	0.00526	2.13737	0.00716	2.14295	-0.01268	2.14295	-0.0137	2.14295	-0.03336	2.14295	0.02989	2.14295	0.05881	2.14295	0.09282	2.14295	0.22637
2.13915	0.00149	2.13915	0.0052	2.13915	0.00731	2.14474	-0.01444	2.14474	-0.01437	2.14474	-0.03359	2.14474	0.0296	2.14474	0.04799	2.14474	0.0777	2.14474	0.18356
2.14092	0.00131	2.14092	0.00551	2.14092	0.00735	2.14652	-0.01668	2.14652	-0.01273	2.14652	-0.03628	2.14652	0.03	2.14652	0.04355	2.14652	0.07089	2.14652	0.14769
2.1427	0.0009558	2.1427	0.00556	2.1427	0.00752	2.1483	-0.01613	2.1483	-0.01003	2.1483	-0.03534	2.1483	0.02503	2.1483	0.03631	2.1483	0.06	2.1483	0.12192
2.14447	0.000688568	2.14447	0.00553	2.14447	0.00776	2.15008	-0.01369	2.15008	-0.01049	2.15008	-0.03515	2.15008	0.02268	2.15008	0.0315	2.15008	0.0421	2.15008	0.09208
2.14625	0.000588463	2.14625	0.00557	2.14625	0.00783	2.15186	-0.01214	2.15186	-0.01408	2.15186	-0.03364	2.15186	0.02438	2.15186	0.03125	2.15186	0.03774	2.15186	0.06922
2.14803	0.000654122	2.14803	0.00559	2.14803	0.00772	2.15364	-0.00872	2.15364	-0.01308	2.15364	-0.02968	2.15364	0.02385	2.15364	0.03119	2.15364	0.03032	2.15364	0.0547
2.1498	0.000672795	2.1498	0.0058	2.1498	0.00762	2.15542	-0.00653	2.15542	-0.01566	2.15542	-0.02577	2.15542	0.02004	2.15542	0.02436	2.15542	0.01766	2.15542	0.03906
2.15158	0.000584081	2.15158	0.00568	2.15158	0.00712	2.1572	-0.00672	2.1572	-0.01623	2.1572	-0.02278	2.1572	0.01688	2.1572	0.01892	2.1572	0.0104	2.1572	0.02638
2.15335	0.000554075	2.15335	0.00544	2.15335	0.00675	2.15898	-0.00605	2.15898	-0.01194	2.15898	-0.02201	2.15898	0.0148	2.15898	0.02186	2.15898	0.01006	2.15898	0.01712
2.15513	0.000622031	2.15513	0.00514	2.15513	0.00637	2.16076	-0.00712	2.16076	-0.01017	2.16076	-0.01887	2.16076	0.0127	2.16076	0.01668	2.16076	0.01244	2.16076	0.01047
2.15691	0.000608227	2.15691	0.00499	2.15691	0.0063	2.16254	-0.01011	2.16254	-0.00559	2.16254	-0.01565	2.16254	0.00931	2.16254	0.01095	2.16254	0.01082	2.16254	0.00615
2.15868	0.00060001	2.15868	0.00479	2.15868	0.00681	2.16432	-0.01294	2.16432	-0.00159	2.16432	-0.01386	2.16432	0.00641	2.16432	0.01	2.16432	0.00863	2.16432	0.00109
2.16046	0.00066707	2.16046	0.00458	2.16046	0.00725	2.1661	-0.01217	2.1661	0.000997175	2.1661	-0.01244	2.1661	0.00523	2.1661	0.01536	2.1661	0.01136	2.1661	-0.00231
2.16223	0.000661308	2.16223	0.00489	2.16223	0.00775	2.16788	-0.00989	2.16788	0.00124	2.16788	-0.01079	2.16788	0.00204	2.16788	0.01845	2.16788	0.0086	2.16788	-0.00235
2.16401	0.000897697	2.16401	0.00505	2.16401	0.00763	2.16966	-0.01022	2.16966	0.000582812	2.16966	-0.01294	2.16966	0.00144	2.16966	0.02061	2.16966	0.00597	2.16966	-0.00346
2.16579	0.00116	2.16579	0.00516	2.16579	0.00707	2.17144	-0.00979	2.17144	-7.13441e-05	2.17144	-0.01445	2.17144	-0.000212398	2.17144	0.02526	2.17144	0.00242	2.17144	0.00149
2.16756	0.00155	2.16756	0.00512	2.16756	0.00655	2.17323	-0.01209	2.17323	0.000636368	2.17323	-0.01534	2.17323	0.00326	2.17323	0.02614	2.17323	-0.00107	2.17323	0.00566
2.16934	0.00171	2.16934	0.00483	2.16934	0.00597	2.17501	-0.01539	2.17501	-3.05773e-05	2.17501	-0.01682	2.17501	0.00663	2.17501	0.02613	2.17501	-0.000653344	2.17501	0.00457
2.17111	0.00186	2.17111	0.00448	2.17111	0.00543	2.17679	-0.01786	2.17679	1.03777e-05	2.17679	-0.01857	2.17679	0.00614	2.17679	0.02773	2.17679	-0.00295	2.17679	0.00534
2.17289	0.00205	2.17289	0.00446	2.17289	0.00557	2.17857	-0.01759	2.17857	0.000711789	2.17857	-0.02156	2.17857	0.0069	2.17857	0.02666	2.17857	-0.00359	2.17857	0.0037
2.17466	0.00198	2.17466	0.00461	2.17466	0.00589	2.18035	-0.01571	2.18035	0.000762749	2.18035	-0.02177	2.18035	0.00622	2.18035	0.02443	2.18035	-0.00276	2.18035	0.00141
2.17644	0.00174	2.17644	0.00466	2.17644	0.00592	2.18213	-0.02013	2.18213	-0.000984572	2.18213	-0.03048	2.18213	0.00785	2.18213	0.02918	2.18213	-0.00251	2.18213	-0.00273
2.17822	0.00149	2.17822	0.00456	2.17822	0.00566	2.18391	-0.02112	2.18391	-0.00446	2.18391	-0.03365	2.18391	0.00668	2.18391	0.02866	2.18391	-0.000351465	2.18391	-0.00383
2.17999	0.00146	2.17999	0.00427	2.17999	0.00538	2.18569	-0.01866	2.18569	-0.00812	2.18569	-0.0386	2.18569	0.00237	2.18569	0.02579	2.18569	0.000905044	2.18569	0.000136921
2.18177	0.00131	2.18177	0.00411	2.18177	0.00518	2.18747	-0.01908	2.18747	-0.01084	2.18747	-0.04192	2.18747	-0.00242	2.18747	0.02242	2.18747	0.00248	2.18747	0.000565274
2.18354	0.00119	2.18354	0.00386	2.18354	0.00495	2.18925	-0.02265	2.18925	-0.0149	2.18925	-0.04186	2.18925	-0.00387	2.18925	0.01883	2.18925	0.00621	2.18925	-0.0021
2.18532	0.00119	2.18532	0.0037	2.18532	0.00519	2.19103	-0.02182	2.19103	-0.01817	2.19103	-0.0433	2.19103	-0.0072	2.19103	0.01612	2.19103	0.01255	2.19103	-0.00602
2.18709	0.00114	2.18709	0.00365	2.18709	0.00535	2.19281	-0.01493	2.19281	-0.01968	2.19281	-0.03953	2.19281	-0.01083	2.19281	0.01179	2.19281	0.01664	2.19281	-0.00385
2.18887	0.00116	2.18887	0.00363	2.18887	0.00525	2.19459	-0.01241	2.19459	-0.02157	2.19459	-0.03618	2.19459	-0.01153	2.19459	0.01263	2.19459	0.01744	2.19459	-0.00842
2.19065	0.00121	2.19065	0.00363	2.19065	0.00525	2.19637	-0.0124	2.19637	-0.02568	2.19637	-0.03197	2.19637	-0.00563	2.19637	0.01135	2.19637	0.01838	2.19637	-0.01819
2.19242	0.00119	2.19242	0.0037	2.19242	0.00529	2.19815	-0.01021	2.19815	-0.0272	2.19815	-0.02815	2.19815	0.00235	2.19815	0.01173	2.19815	0.02321	2.19815	-0.01255
2.1942	0.00118	2.1942	0.00386	2.1942	0.00525	2.19993	-0.00701	2.19993	-0.02789	2.19993	-0.0224	2.19993	0.00197	2.19993	0.01218	2.19993	0.02473	2.19993	-0.00726
2.19597	0.00106	2.19597	0.00373	2.19597	0.00498	2.20171	-0.00531	2.20171	-0.02895	2.20171	-0.02896	2.20171	0.000727319	2.20171	0.01424	2.20171	0.01961	2.20171	-0.00755
2.19775	0.000967153	2.19775	0.00371	2.19775	0.00453	2.20349	-0.00649	2.20349	-0.02727	2.20349	-0.03366	2.20349	0.00158	2.20349	0.00995	2.20349	0.01865	2.20349	-0.0074
2.19952	0.001	2.19952	0.00382	2.19952	0.00424	2.20527	-0.00681	2.20527	-0.02298	2.20527	-0.03502	2.20527	-0.00189	2.20527	0.00653	2.20527	0.01447	2.20527	0.00516
2.2013	0.00115	2.2013	0.00396	2.2013	0.00441	2.20705	-0.00528	2.20705	-0.01875	2.20705	-0.03754	2.20705	-0.00309	2.20705	0.00658	2.20705	0.01009	2.20705	0.01601
2.20307	0.00138	2.20307	0.00407	2.20307	0.00465	2.20883	-0.00437	2.20883	-0.01573	2.20883	-0.0423	2.20883	-0.00347	2.20883	0.00266	2.20883	0.00982	2.20883	0.02011
2.20485	0.00129	2.20485	0.00416	2.20485	0.00457	2.21061	-0.00259	2.21061	-0.01204	2.21061	-0.0476	2.21061	-0.00152	2.21061	0.0019	2.21061	0.009	2.21061	0.02761
2.20663	0.00104	2.20663	0.0042	2.20663	0.00445	2.21239	-0.003	2.21239	-0.0091	2.21239	-0.04171	2.21239	0.00485	2.21239	0.00103	2.21239	0.00991	2.21239	0.03087
2.2084	0.000956092	2.2084	0.00424	2.2084	0.00453	2.21417	-0.00484	2.21417	-0.00619	2.21417	-0.03482	2.21417	0.01193	2.21417	0.00177	2.21417	0.00499	2.21417	0.02903
2.21018	0.00104	2.21018	0.00457	2.21018	0.0047	2.21595	-0.00671	2.21595	-0.00724	2.21595	-0.02909	2.21595	0.0116	2.21595	0.00109	2.21595	0.00207	2.21595	0.02847
2.21195	0.00111	2.21195	0.00466	2.21195	0.00474	2.21773	-0.00754	2.21773	-0.00664	2.21773	-0.02017	2.21773	0.01353	2.21773	-0.00118	2.21773	0.00484	2.21773	0.03109
2.21373	0.00102	2.21373	0.00469	2.21373	0.00448	2.21951	-0.00703	2.21951	-0.0052	2.21951	-0.01031	2.21951	0.02076	2.21951	0.00353	2.21951	0.00371	2.21951	0.03247
2.2155	0.00109	2.2155	0.00448	2.2155	0.00435	2.22129	-0.00679	2.22129	-0.00365	2.22129	-0.00835	2.22129	0.02299	2.22129	0.00527	2.22129	0.0057	2.22129	0.03051
2.21728	0.00114	2.21728	0.00425	2.21728	0.00428	2.22307	-0.00602	2.22307	-0.00145	2.22307	-0.00732	2.22307	0.02426	2.22307	0.00506	2.22307	0.0103	2.22307	0.03045
2.21905	0.00116	2.21905	0.00389	2.21905	0.00426	2.22485	-0.00324	2.22485	-0.00245	2.22485	-0.01011	2.22485	0.02495	2.22485	0.00693	2.22485	0.0156	2.22485	0.03737
2.22083	0.00118	2.22083	0.00323	2.22083	0.00445	2.22663	0.00228	2.22663	-0.00186	2.22663	-0.01351	2.22663	0.02822	2.22663	0.0047	2.22663	0.0141	2.22663	0.04122
2.2226	0.00118	2.2226	0.00308	2.2226	0.00441	2.22841	0.00544	2.22841	-0.000901921	2.22841	-0.01774	2.22841	0.031	2.22841	0.00729	2.22841	0.01058	2.22841	0.04206
2.22438	0.00124	2.22438	0.00325	2.22438	0.00451	2.23019	0.00514	2.23019	-0.00203	2.23019	-0.02302	2.23019	0.0276	2.23019	0.00547	2.23019	0.01087	2.23019	0.04351
2.22615	0.00122	2.22615	0.00341	2.22615	0.00441	2.23197	0.00605	2.23197	-0.00338	2.23197	-0.02204	2.23197	0.02407	2.23197	0.00615	2.23197	0.00991	2.23197	0.04491
2.22793	0.00108	2.22793	0.00342	2.22793	0.0043	2.23375	0.00476	2.23375	-0.000347648	2.23375	-0.02104	2.23375	0.01901	2.23375	0.01388	2.23375	0.00754	2.23375	0.04625
2.22971	0.00101	2.22971	0.00364	2.22971	0.00438	2.23553	0.000939841	2.23553	-0.000146025	2.23553	-0.01576	2.23553	0.01307	2.23553	0.01416	2.23553	0.00836	2.23553	0.04177
2.23148	0.00129	2.23148	0.00379	2.23148	0.00452	2.23731	-0.00209	2.23731	-0.00255	2.23731	-0.0098	2.23731	0.00893	2.23731	0.01934	2.23731	0.01516	2.23731	0.03193
2.23326	0.00158	2.23326	0.00383	2.23326	0.00447	2.23909	-0.0058	2.23909	-0.00396	2.23909	-0.01144	2.23909	0.00826	2.23909	0.02296	2.23909	0.0137	2.23909	0.02842
2.23503	0.00167	2.23503	0.00378	2.23503	0.00432	2.24087	-0.00753	2.24087	-0.00441	2.24087	-0.01337	2.24087	0.01106	2.24087	0.023	2.24087	0.01476	2.24087	0.02444
2.23681	0.00165	2.23681	0.00373	2.23681	0.00412	2.24265	-0.00711	2.24265	-0.00568	2.24265	-0.01398	2.24265	0.00831	2.24265	0.02326	2.24265	0.01146	2.24265	0.02108
2.23858	0.00151	2.23858	0.0039	2.23858	0.00387	2.24443	-0.00782	2.24443	-0.00973	2.24443	-0.01717	2.24443	0.00862	2.24443	0.02707	2.24443	0.01151	2.24443	0.01831
2.24036	0.00158	2.24036	0.00392	2.24036	0.00395	2.24621	-0.00637	2.24621	-0.01329	2.24621	-0.02528	2.24621	0.00863	2.24621	0.02725	2.24621	0.0084	2.24621	0.02114
2.24213	0.00168	2.24213	0.0039	2.24213	0.00419	2.24799	-0.00832	2.24799	-0.0158	2.24799	-0.02996	2.24799	0.00883	2.24799	0.02502	2.24799	0.000579563	2.24799	0.02937
2.24391	0.00172	2.24391	0.00387	2.24391	0.00431	2.24977	-0.00609	2.24977	-0.01911	2.24977	-0.02449	2.24977	0.00694	2.24977	0.02443	2.24977	0.0037	2.24977	0.03363
2.24568	0.00168	2.24568	0.00386	2.24568	0.00437	2.25155	-0.00595	2.25155	-0.02249	2.25155	-0.01996	2.25155	0.00513	2.25155	0.02788	2.25155	0.00612	2.25155	0.03998
2.24746	0.00139	2.24746	0.00376	2.24746	0.00444	2.25333	-0.0071	2.25333	-0.02368	2.25333	-0.01915	2.25333	0.00695	2.25333	0.03006	2.25333	0.01032	2.25333	0.04353
2.24923	0.00108	2.24923	0.00329	2.24923	0.00445	2.25511	-0.00393	2.25511	-0.02641	2.25511	-0.01042	2.25511	0.00385	2.25511	0.02433	2.25511	0.0118	2.25511	0.04446
2.25101	0.000846817	2.25101	0.00301	2.25101	0.0045	2.25689	-0.00266	2.25689	-0.02871	2.25689	-0.00726	2.25689	0.00235	2.25689	0.02618	2.25689	0.01661	2.25689	0.04376
2.25278	0.000802518	2.25278	0.00278	2.25278	0.0047	2.25867	-0.00359	2.25867	-0.03042	2.25867	-0.00717	2.25867	-2.46402e-05	2.25867	0.02938	2.25867	0.02006	2.25867	0.04651
2.25456	0.00088835	2.25456	0.00256	2.25456	0.00491	2.26045	-0.00404	2.26045	-0.03207	2.26045	-0.00626	2.26045	-0.00497	2.26045	0.02645	2.26045	0.0173	2.26045	0.0459
2.25633	0.001	2.25633	0.00239	2.25633	0.00507	2.26223	-0.00567	2.26223	-0.03082	2.26223	-0.00961	2.26223	-0.00937	2.26223	0.02761	2.26223	0.01263	2.26223	0.0459
2.25811	0.00117	2.25811	0.00224	2.25811	0.00523	2.26401	-0.00573	2.26401	-0.03189	2.26401	-0.0134	2.26401	-0.01101	2.26401	0.03295	2.26401	0.0113	2.26401	0.04746
2.25988	0.00131	2.25988	0.00213	2.25988	0.00574	2.26579	-0.00368	2.26579	-0.02926	2.26579	-0.01742	2.26579	-0.01114	2.26579	0.02811	2.26579	0.01203	2.26579	0.04993
2.26166	0.00136	2.26166	0.00203	2.26166	0.00598	2.26757	-0.00271	2.26757	-0.0225	2.26757	-0.01769	2.26757	-0.01222	2.26757	0.02244	2.26757	0.01667	2.26757	0.06042
2.26343	0.00145	2.26343	0.00176	2.26343	0.00582	2.26935	-0.00298	2.26935	-0.01732	2.26935	-0.01834	2.26935	-0.01211	2.26935	0.02387	2.26935	0.02535	2.26935	0.06439
2.26521	0.00139	2.26521	0.00178	2.26521	0.00586	2.27113	-0.00324	2.27113	-0.01338	2.27113	-0.0212	2.27113	-0.00943	2.27113	0.02318	2.27113	0.02444	2.27113	0.06366
2.26698	0.00133	2.26698	0.00187	2.26698	0.00575	2.27291	-0.00284	2.27291	-0.01203	2.27291	-0.01554	2.27291	-0.00712	2.27291	0.01787	2.27291	0.03072	2.27291	0.06682
2.26876	0.00133	2.26876	0.00226	2.26876	0.00554	2.27469	-0.00331	2.27469	-0.01009	2.27469	-0.01611	2.27469	-0.00461	2.27469	0.01178	2.27469	0.0346	2.27469	0.06568
2.27053	0.00133	2.27053	0.00263	2.27053	0.00537	2.27646	-0.00965	2.27646	-0.01094	2.27646	-0.01686	2.27646	0.000626254	2.27646	0.01083	2.27646	0.03922	2.27646	0.06712
2.27231	0.00134	2.27231	0.00305	2.27231	0.00536	2.27824	-0.01033	2.27824	-0.01036	2.27824	-0.0114	2.27824	0.00106	2.27824	0.00904	2.27824	0.03814	2.27824	0.06795
2.27408	0.00111	2.27408	0.00375	2.27408	0.00534	2.28002	-0.00805	2.28002	-0.00913	2.28002	-0.01638	2.28002	0.00569	2.28002	0.00476	2.28002	0.03656	2.28002	0.06601
2.27586	0.000654763	2.27586	0.00409	2.27586	0.00509	2.2818	-0.01056	2.2818	-0.0101	2.2818	-0.01624	2.2818	0.00778	2.2818	-0.000692291	2.2818	0.0368	2.2818	0.06587
2.27763	0.000520486	2.27763	0.00429	2.27763	0.00477	2.28358	-0.0121	2.28358	-0.00943	2.28358	-0.01201	2.28358	0.00859	2.28358	-0.00112	2.28358	0.03137	2.28358	0.06107
2.27941	0.000464134	2.27941	0.00424	2.27941	0.00443	2.28536	-0.01338	2.28536	-0.01021	2.28536	-0.01207	2.28536	0.00798	2.28536	0.003	2.28536	0.02745	2.28536	0.06128
2.28118	0.000303393	2.28118	0.00423	2.28118	0.00402	2.28714	-0.01482	2.28714	-0.01229	2.28714	-0.01276	2.28714	0.00406	2.28714	0.00624	2.28714	0.02114	2.28714	0.06362
2.28296	0.000229535	2.28296	0.00439	2.28296	0.00354	2.28892	-0.02052	2.28892	-0.01373	2.28892	-0.01717	2.28892	0.01024	2.28892	0.0071	2.28892	0.01752	2.28892	0.05976
2.28473	0.000202373	2.28473	0.00432	2.28473	0.00299	2.2907	-0.02339	2.2907	-0.01661	2.2907	-0.01419	2.2907	0.01683	2.2907	0.00682	2.2907	0.02109	2.2907	0.06196
2.2865	0.000269726	2.2865	0.00421	2.2865	0.00281	2.29248	-0.02312	2.29248	-0.01443	2.29248	-0.01752	2.29248	0.01709	2.29248	0.01351	2.29248	0.02635	2.29248	0.07177
2.28828	0.00033819	2.28828	0.00399	2.28828	0.00284	2.29426	-0.02386	2.29426	-0.01586	2.29426	-0.02245	2.29426	0.01486	2.29426	0.01442	2.29426	0.03317	2.29426	0.07521
2.29005	0.000510535	2.29005	0.00359	2.29005	0.00283	2.29604	-0.01926	2.29604	-0.01581	2.29604	-0.02432	2.29604	0.01531	2.29604	0.0141	2.29604	0.04242	2.29604	0.08353
2.29183	0.000611478	2.29183	0.00322	2.29183	0.00298	2.29782	-0.01503	2.29782	-0.01942	2.29782	-0.0224	2.29782	0.02084	2.29782	0.02059	2.29782	0.0485	2.29782	0.08757
2.2936	0.000686484	2.2936	0.00292	2.2936	0.00304	2.2996	-0.00664	2.2996	-0.02717	2.2996	-0.02425	2.2996	0.02708	2.2996	0.02274	2.2996	0.05097	2.2996	0.08793
2.29538	0.000825184	2.29538	0.00291	2.29538	0.003	2.30138	0.000289842	2.30138	-0.03224	2.30138	-0.02563	2.30138	0.03423	2.30138	0.0233	2.30138	0.05113	2.30138	0.08831
2.29715	0.000969957	2.29715	0.00279	2.29715	0.0026	2.30316	0.00159	2.30316	-0.03562	2.30316	-0.02302	2.30316	0.03991	2.30316	0.02568	2.30316	0.05751	2.30316	0.08996
2.29893	0.00095362	2.29893	0.0026	2.29893	0.00237	2.30493	0.00325	2.30493	-0.0369	2.30493	-0.0207	2.30493	0.04224	2.30493	0.03189	2.30493	0.05798	2.30493	0.0874
2.3007	0.000841714	2.3007	0.0024	2.3007	0.0022	2.30671	0.00447	2.30671	-0.03764	2.30671	-0.02276	2.30671	0.04041	2.30671	0.03504	2.30671	0.05266	2.30671	0.0789
2.30248	0.00079541	2.30248	0.00214	2.30248	0.00167	2.30849	0.00262	2.30849	-0.03672	2.30849	-0.02622	2.30849	0.03468	2.30849	0.03629	2.30849	0.05144	2.30849	0.07652
2.30425	0.000833925	2.30425	0.0019	2.30425	0.00138	2.31027	0.00092808	2.31027	-0.0358	2.31027	-0.02453	2.31027	0.02901	2.31027	0.03786	2.31027	0.04957	2.31027	0.08075
2.30603	0.00095993	2.30603	0.00189	2.30603	0.00138	2.31205	0.00192	2.31205	-0.03302	2.31205	-0.0242	2.31205	0.02237	2.31205	0.03867	2.31205	0.04678	2.31205	0.07871
2.3078	0.00109	2.3078	0.00205	2.3078	0.00143	2.31383	0.00529	2.31383	-0.029	2.31383	-0.02987	2.31383	0.01557	2.31383	0.03294	2.31383	0.04008	2.31383	0.07044
2.30957	0.00114	2.30957	0.00205	2.30957	0.00158	2.31561	0.00364	2.31561	-0.02503	2.31561	-0.03409	2.31561	0.014	2.31561	0.02874	2.31561	0.03387	2.31561	0.07454
2.31135	0.00125	2.31135	0.00179	2.31135	0.00169	2.31739	0.00292	2.31739	-0.02154	2.31739	-0.03553	2.31739	0.01532	2.31739	0.02246	2.31739	0.03456	2.31739	0.07712
2.31312	0.0015	2.31312	0.00163	2.31312	0.0018	2.31917	0.00744	2.31917	-0.02046	2.31917	-0.0383	2.31917	0.0177	2.31917	0.01264	2.31917	0.0334	2.31917	0.07502
2.3149	0.00162	2.3149	0.00148	2.3149	0.00207	2.32095	0.00559	2.32095	-0.01901	2.32095	-0.04028	2.32095	0.01664	2.32095	0.01184	2.32095	0.03176	2.32095	0.07807
2.31667	0.0014	2.31667	0.00136	2.31667	0.00226	2.32273	0.00208	2.32273	-0.01728	2.32273	-0.03959	2.32273	0.01734	2.32273	0.01345	2.32273	0.03469	2.32273	0.08009
2.31845	0.00116	2.31845	0.00125	2.31845	0.0023	2.32451	-0.000354447	2.32451	-0.02001	2.32451	-0.03591	2.32451	0.02229	2.32451	0.01674	2.32451	0.0428	2.32451	0.0828
2.32022	0.00108	2.32022	0.00146	2.32022	0.00192	2.32628	0.000251026	2.32628	-0.02264	2.32628	-0.03133	2.32628	0.02297	2.32628	0.02118	2.32628	0.04858	2.32628	0.07971
2.322	0.00111	2.322	0.00163	2.322	0.0013	2.32806	-0.000875318	2.32806	-0.02377	2.32806	-0.0241	2.32806	0.02458	2.32806	0.02775	2.32806	0.04894	2.32806	0.07869
2.32377	0.00109	2.32377	0.00176	2.32377	0.000918403	2.32984	-0.000925559	2.32984	-0.02257	2.32984	-0.02245	2.32984	0.0307	2.32984	0.03719	2.32984	0.04809	2.32984	0.07782
2.32554	0.00104	2.32554	0.00173	2.32554	0.000508011	2.33162	-0.000202971	2.33162	-0.02109	2.33162	-0.02024	2.33162	0.02983	2.33162	0.03918	2.33162	0.04756	2.33162	0.07399
2.32732	0.00104	2.32732	0.00187	2.32732	0.000459739	2.3334	-0.000718136	2.3334	-0.01888	2.3334	-0.01321	2.3334	0.02968	2.3334	0.03599	2.3334	0.04352	2.3334	0.07518
2.32909	0.000982867	2.32909	0.00196	2.32909	0.000660893	2.33518	-0.000630007	2.33518	-0.01879	2.33518	-0.01573	2.33518	0.03073	2.33518	0.03401	2.33518	0.03412	2.33518	0.06777
2.33087	0.00103	2.33087	0.00173	2.33087	0.000774805	2.33696	-0.00308	2.33696	-0.02025	2.33696	-0.01785	2.33696	0.02707	2.33696	0.02969	2.33696	0.03416	2.33696	0.06273
2.33264	0.00094476	2.33264	0.00157	2.33264	0.000429986	2.33874	-0.00656	2.33874	-0.01841	2.33874	-0.02466	2.33874	0.02438	2.33874	0.02381	2.33874	0.03043	2.33874	0.06139
2.33442	0.000655251	2.33442	0.00158	2.33442	0.000109613	2.34052	-0.01001	2.34052	-0.01936	2.34052	-0.02445	2.34052	0.01958	2.34052	0.01766	2.34052	0.02845	2.34052	0.06501
2.33619	0.000463978	2.33619	0.00161	2.33619	0.000462726	2.34229	-0.01473	2.34229	-0.02025	2.34229	-0.02453	2.34229	0.01589	2.34229	0.00943	2.34229	0.03217	2.34229	0.06436
2.33796	0.000291028	2.33796	0.00163	2.33796	0.000724326	2.34407	-0.0165	2.34407	-0.02065	2.34407	-0.02558	2.34407	0.01049	2.34407	0.00761	2.34407	0.03717	2.34407	0.05848
2.33974	0.000211018	2.33974	0.00197	2.33974	0.000576191	2.34585	-0.01584	2.34585	-0.01463	2.34585	-0.02452	2.34585	0.00584	2.34585	0.00177	2.34585	0.04508	2.34585	0.06241
2.34151	0.000100807	2.34151	0.00245	2.34151	0.000729054	2.34763	-0.01248	2.34763	-0.01164	2.34763	-0.02287	2.34763	0.00202	2.34763	-0.00176	2.34763	0.04331	2.34763	0.06417
2.34329	1.56563e-05	2.34329	0.00256	2.34329	0.000997817	2.34941	-0.0117	2.34941	-0.01011	2.34941	-0.02054	2.34941	-0.00501	2.34941	-0.000242832	2.34941	0.03823	2.34941	0.06461
2.34506	0.000269415	2.34506	0.00251	2.34506	0.000692976	2.35119	-0.01446	2.35119	-0.00627	2.35119	-0.02544	2.35119	-0.00937	2.35119	0.00279	2.35119	0.04175	2.35119	0.06336
2.34683	0.000431129	2.34683	0.00236	2.34683	5.04216e-05	2.35297	-0.0079	2.35297	-0.00419	2.35297	-0.02607	2.35297	-0.00724	2.35297	0.00402	2.35297	0.04372	2.35297	0.06503
2.34861	0.000417323	2.34861	0.00209	2.34861	-0.000258195	2.35475	-0.00748	2.35475	-0.00589	2.35475	-0.02872	2.35475	-0.00428	2.35475	0.00137	2.35475	0.03876	2.35475	0.06721
2.35038	0.000272198	2.35038	0.00178	2.35038	-4.31927e-05	2.35652	-0.00947	2.35652	-0.00918	2.35652	-0.02635	2.35652	-0.00616	2.35652	0.00217	2.35652	0.03766	2.35652	0.06466
2.35216	0.000240712	2.35216	0.00159	2.35216	0.000162993	2.3583	-0.00737	2.3583	-0.01092	2.3583	-0.02394	2.3583	-0.00472	2.3583	0.00879	2.3583	0.04523	2.3583	0.06586
2.35393	0.000359043	2.35393	0.00157	2.35393	3.34146e-05	2.36008	-0.00778	2.36008	-0.01333	2.36008	-0.02168	2.36008	0.000584274	2.36008	0.00946	2.36008	0.04596	2.36008	0.06036
2.3557	0.000403849	2.3557	0.00154	2.3557	-0.000244499	2.36186	-0.00662	2.36186	-0.01483	2.36186	-0.01752	2.36186	0.0022	2.36186	0.00551	2.36186	0.04117	2.36186	0.05971
2.35748	0.000239096	2.35748	0.0017	2.35748	-0.000627925	2.36364	-0.00595	2.36364	-0.01687	2.36364	-0.01289	2.36364	0.00332	2.36364	0.00625	2.36364	0.04202	2.36364	0.05503
2.35925	6.17847e-05	2.35925	0.00178	2.35925	-0.000906495	2.36542	-0.00564	2.36542	-0.01871	2.36542	-0.00813	2.36542	0.01144	2.36542	0.00846	2.36542	0.04468	2.36542	0.05082
2.36103	6.87746e-05	2.36103	0.00192	2.36103	-0.00116	2.3672	-0.00239	2.3672	-0.01847	2.3672	-0.01412	2.3672	0.01527	2.3672	0.00986	2.3672	0.0383	2.3672	0.05163
2.3628	0.000122927	2.3628	0.00192	2.3628	-0.00105	2.36898	-0.00344	2.36898	-0.01858	2.36898	-0.01904	2.36898	0.01348	2.36898	0.00827	2.36898	0.03292	2.36898	0.04696
2.36457	0.000324073	2.36457	0.00189	2.36457	-0.000877931	2.37075	-0.00207	2.37075	-0.02109	2.37075	-0.01767	2.37075	0.01353	2.37075	0.01317	2.37075	0.03514	2.37075	0.04295
2.36635	0.000600729	2.36635	0.00208	2.36635	-0.000904497	2.37253	0.000722334	2.37253	-0.02546	2.37253	-0.01839	2.37253	0.01422	2.37253	0.01943	2.37253	0.03453	2.37253	0.04107
2.36812	0.00091785	2.36812	0.00212	2.36812	-0.000895233	2.37431	-0.00204	2.37431	-0.02792	2.37431	-0.02461	2.37431	0.01073	2.37431	0.02833	2.37431	0.03129	2.37431	0.04049
2.3699	0.00119	2.3699	0.00184	2.3699	-0.000565281	2.37609	-0.00511	2.37609	-0.02794	2.37609	-0.02308	2.37609	0.00529	2.37609	0.03582	2.37609	0.02995	2.37609	0.04281
2.37167	0.00134	2.37167	0.00159	2.37167	-0.000176376	2.37787	-0.00718	2.37787	-0.02643	2.37787	-0.02157	2.37787	0.01331	2.37787	0.03853	2.37787	0.03035	2.37787	0.04131
2.37344	0.00134	2.37344	0.00126	2.37344	0.000275383	2.37965	-0.00883	2.37965	-0.02218	2.37965	-0.02098	2.37965	0.02073	2.37965	0.03783	2.37965	0.03213	2.37965	0.04106
2.37522	0.00122	2.37522	0.00101	2.37522	0.00048679	2.38142	-0.00807	2.38142	-0.01571	2.38142	-0.02335	2.38142	0.02099	2.38142	0.03425	2.38142	0.03547	2.38142	0.04493
2.37699	0.00116	2.37699	0.000584252	2.37699	0.000289346	2.3832	-0.00556	2.3832	-0.00913	2.3832	-0.02526	2.3832	0.02233	2.3832	0.03493	2.3832	0.03607	2.3832	0.04807
2.37877	0.00122	2.37877	0.0001792	2.37877	0.000229461	2.38498	-0.00141	2.38498	-0.00784	2.38498	-0.02386	2.38498	0.01974	2.38498	0.02837	2.38498	0.03726	2.38498	0.0456
2.38054	0.0012	2.38054	3.06514e-05	2.38054	0.000154775	2.38676	0.00366	2.38676	-0.00982	2.38676	-0.02762	2.38676	0.01752	2.38676	0.01955	2.38676	0.03985	2.38676	0.04004
2.38231	0.00108	2.38231	0.000210963	2.38231	-2.06975e-05	2.38854	0.00336	2.38854	-0.01001	2.38854	-0.02659	2.38854	0.01021	2.38854	0.01583	2.38854	0.04477	2.38854	0.0374
2.38409	0.000778781	2.38409	0.0001033	2.38409	-0.000432887	2.39032	0.00242	2.39032	-0.01291	2.39032	-0.02475	2.39032	9.3765e-05	2.39032	0.00856	2.39032	0.04765	2.39032	0.0406
2.38586	0.000587274	2.38586	-0.000140035	2.38586	-0.000808476	2.3921	0.000853309	2.3921	-0.01471	2.3921	-0.02348	2.3921	-0.00255	2.3921	0.00109	2.3921	0.05319	2.3921	0.04327
2.38763	0.000570374	2.38763	-0.000319261	2.38763	-0.000895375	2.39387	-0.00567	2.39387	-0.01715	2.39387	-0.02215	2.39387	-0.00854	2.39387	-0.00856	2.39387	0.05195	2.39387	0.03908
2.38941	0.000425112	2.38941	-0.000305825	2.38941	-0.000913172	2.39565	-0.01294	2.39565	-0.0192	2.39565	-0.01931	2.39565	-0.009	2.39565	-0.01206	2.39565	0.04243	2.39565	0.0409
2.39118	0.000271284	2.39118	-4.16528e-05	2.39118	-0.000805395	2.39743	-0.01609	2.39743	-0.01498	2.39743	-0.01287	2.39743	-0.01025	2.39743	-0.01462	2.39743	0.03973	2.39743	0.0489
2.39296	0.000332426	2.39296	0.000186605	2.39296	-0.000735645	2.39921	-0.0169	2.39921	-0.01815	2.39921	-0.01149	2.39921	-0.00993	2.39921	-0.02048	2.39921	0.03339	2.39921	0.05538
2.39473	0.000550687	2.39473	0.000514062	2.39473	-0.000492069	2.40099	-0.01761	2.40099	-0.01921	2.40099	-0.01452	2.40099	-0.000268295	2.40099	-0.01665	2.40099	0.02775	2.40099	0.05449
2.3965	0.000707805	2.3965	0.000595383	2.3965	-0.000229175	2.40276	-0.01987	2.40276	-0.0194	2.40276	-0.01598	2.40276	0.00577	2.40276	-0.01078	2.40276	0.02393	2.40276	0.05022
2.39828	0.000799422	2.39828	0.000546248	2.39828	-0.000335849	2.40454	-0.01989	2.40454	-0.02061	2.40454	-0.01638	2.40454	0.01263	2.40454	-0.00423	2.40454	0.02048	2.40454	0.05392
2.40005	0.000735884	2.40005	0.000581527	2.40005	-0.000506822	2.40632	-0.01599	2.40632	-0.02283	2.40632	-0.0216	2.40632	0.01991	2.40632	0.0013	2.40632	0.01659	2.40632	0.05187
2.40182	0.000838307	2.40182	0.000664992	2.40182	-0.000890972	2.4081	-0.01532	2.4081	-0.02952	2.4081	-0.02434	2.4081	0.02079	2.4081	0.00649	2.4081	0.01237	2.4081	0.04599
2.4036	0.000901551	2.4036	0.000664544	2.4036	-0.00108	2.40988	-0.01463	2.40988	-0.02948	2.40988	-0.02758	2.40988	0.02182	2.40988	0.01259	2.40988	0.00827	2.40988	0.04971
2.40537	0.000806237	2.40537	0.000283267	2.40537	-0.00156	2.41166	-0.01249	2.41166	-0.02943	2.41166	-0.02787	2.41166	0.02094	2.41166	0.01253	2.41166	0.00284	2.41166	0.04892
2.40714	0.000628223	2.40714	0.00013604	2.40714	-0.00179	2.41343	-0.00798	2.41343	-0.03081	2.41343	-0.02785	2.41343	0.01486	2.41343	0.01058	2.41343	-0.00413	2.41343	0.04896
2.40892	0.000325337	2.40892	0.000156112	2.40892	-0.00157	2.41521	-0.00487	2.41521	-0.02973	2.41521	-0.03026	2.41521	0.01331	2.41521	0.00623	2.41521	-0.00285	2.41521	0.04832
2.41069	0.000218203	2.41069	7.90484e-05	2.41069	-0.00125	2.41699	-0.00235	2.41699	-0.02346	2.41699	-0.02505	2.41699	0.00697	2.41699	0.00725	2.41699	-0.00067794	2.41699	0.04716
2.41246	0.000355401	2.41246	-2.7029e-05	2.41246	-0.00119	2.41877	-0.00148	2.41877	-0.02024	2.41877	-0.02174	2.41877	0.00738	2.41877	0.00305	2.41877	-0.00375	2.41877	0.04401
2.41424	0.000610367	2.41424	-9.24827e-05	2.41424	-0.000934687	2.42055	-0.00439	2.42055	-0.02258	2.42055	-0.01916	2.42055	0.01107	2.42055	0.00116	2.42055	-0.00296	2.42055	0.03914
2.41601	0.000907551	2.41601	1.90694e-05	2.41601	-0.000590848	2.42232	-0.00843	2.42232	-0.02214	2.42232	-0.01686	2.42232	0.01561	2.42232	-0.00061573	2.42232	-0.00346	2.42232	0.04519
2.41778	0.000983216	2.41778	5.04053e-05	2.41778	-0.000230307	2.4241	-0.01382	2.4241	-0.02048	2.4241	-0.01085	2.4241	0.01852	2.4241	0.0012	2.4241	-0.00328	2.4241	0.05153
2.41956	0.000826372	2.41956	8.72983e-05	2.41956	7.7996e-05	2.42588	-0.01852	2.42588	-0.02482	2.42588	-0.00985	2.42588	0.01843	2.42588	0.00597	2.42588	-0.00792	2.42588	0.05687
2.42133	0.000832193	2.42133	0.000174915	2.42133	0.000183918	2.42766	-0.02544	2.42766	-0.03065	2.42766	-0.01251	2.42766	0.0191	2.42766	0.00575	2.42766	-0.00623	2.42766	0.06155
2.4231	0.000760225	2.4231	0.000393071	2.4231	0.000386794	2.42944	-0.02866	2.42944	-0.02921	2.42944	-0.00952	2.42944	0.01121	2.42944	0.00726	2.42944	0.000142212	2.42944	0.06955
2.42488	0.000739799	2.42488	0.000408886	2.42488	0.000434162	2.43121	-0.02772	2.43121	-0.02993	2.43121	-0.00594	2.43121	0.000549825	2.43121	0.00772	2.43121	0.000380819	2.43121	0.06883
2.42665	0.000641913	2.42665	0.00030355	2.42665	0.000396629	2.43299	-0.02864	2.43299	-0.03328	2.43299	-0.00576	2.43299	-0.00517	2.43299	0.00638	2.43299	0.00152	2.43299	0.06244
2.42842	0.000476382	2.42842	-2.59111e-06	2.42842	9.16929e-06	2.43477	-0.02741	2.43477	-0.03171	2.43477	-0.0061	2.43477	-0.00949	2.43477	0.00657	2.43477	0.0029	2.43477	0.05861
2.4302	0.000581219	2.4302	-0.000444642	2.4302	-0.000685481	2.43655	-0.02545	2.43655	-0.02571	2.43655	0.00182	2.43655	-0.01505	2.43655	0.00847	2.43655	0.01018	2.43655	0.05832
2.43197	0.000771364	2.43197	-0.000836207	2.43197	-0.000887252	2.43833	-0.02732	2.43833	-0.02369	2.43833	0.00208	2.43833	-0.01579	2.43833	0.01238	2.43833	0.01419	2.43833	0.04995
2.43374	0.00097909	2.43374	-0.00112	2.43374	-0.000905515	2.4401	-0.02485	2.4401	-0.0248	2.4401	-0.00132	2.4401	-0.01262	2.4401	0.01429	2.4401	0.01442	2.4401	0.04322
2.43552	0.00092852	2.43552	-0.00104	2.43552	-0.000923359	2.44188	-0.02265	2.44188	-0.02057	2.44188	-0.00339	2.44188	-0.00679	2.44188	0.01733	2.44188	0.02051	2.44188	0.03741
2.43729	0.000645398	2.43729	-0.000781805	2.43729	-0.000791631	2.44366	-0.02287	2.44366	-0.01735	2.44366	-0.00806	2.44366	-0.00744	2.44366	0.02232	2.44366	0.02282	2.44366	0.03786
2.43906	0.000635234	2.43906	-0.00059253	2.43906	-0.000905515	2.44544	-0.02173	2.44544	-0.02021	2.44544	-0.01161	2.44544	-0.00496	2.44544	0.0196	2.44544	0.01939	2.44544	0.03752
2.44084	0.000879452	2.44084	-0.000676496	2.44084	-0.00113	2.44721	-0.02071	2.44721	-0.01954	2.44721	-0.01175	2.44721	0.00331	2.44721	0.01207	2.44721	0.02022	2.44721	0.02999
2.44261	0.00103	2.44261	-0.000769137	2.44261	-0.0015	2.44899	-0.01855	2.44899	-0.01792	2.44899	-0.01148	2.44899	0.00754	2.44899	0.01085	2.44899	0.01851	2.44899	0.02838
2.44438	0.000835152	2.44438	-0.000948734	2.44438	-0.00165	2.45077	-0.02151	2.45077	-0.01589	2.45077	-0.01645	2.45077	0.01032	2.45077	0.01262	2.45077	0.02018	2.45077	0.0234
2.44616	0.000445402	2.44616	-0.00103	2.44616	-0.0015	2.45255	-0.02513	2.45255	-0.01769	2.45255	-0.01975	2.45255	0.00902	2.45255	0.01018	2.45255	0.01939	2.45255	0.02073
2.44793	0.000444176	2.44793	-0.00081108	2.44793	-0.00131	2.45433	-0.02718	2.45433	-0.02	2.45433	-0.01397	2.45433	0.00988	2.45433	0.00431	2.45433	0.01916	2.45433	0.01688
2.4497	0.000456093	2.4497	-0.000709078	2.4497	-0.00134	2.4561	-0.02747	2.4561	-0.01974	2.4561	-0.01465	2.4561	0.00672	2.4561	0.0041	2.4561	0.01907	2.4561	0.01444
2.45147	0.000640551	2.45147	-0.000423168	2.45147	-0.00127	2.45788	-0.02812	2.45788	-0.02191	2.45788	-0.02018	2.45788	0.00195	2.45788	0.00635	2.45788	0.01682	2.45788	0.01652
2.45325	0.000975272	2.45325	-9.89215e-06	2.45325	-0.00137	2.45966	-0.02869	2.45966	-0.025	2.45966	-0.02364	2.45966	0.00228	2.45966	-0.000200679	2.45966	0.01756	2.45966	0.0163
2.45502	0.00139	2.45502	-4.05695e-05	2.45502	-0.00171	2.46144	-0.02699	2.46144	-0.02529	2.46144	-0.02299	2.46144	0.00437	2.46144	-0.000750656	2.46144	0.01386	2.46144	0.02336
2.45679	0.00177	2.45679	-0.000167007	2.45679	-0.00187	2.46321	-0.02427	2.46321	-0.02506	2.46321	-0.02094	2.46321	0.00691	2.46321	0.000341013	2.46321	0.0131	2.46321	0.02978
2.45857	0.00185	2.45857	-0.000273453	2.45857	-0.0019	2.46499	-0.02187	2.46499	-0.02557	2.46499	-0.02634	2.46499	0.00489	2.46499	0.000885946	2.46499	0.01584	2.46499	0.03112
2.46034	0.0019	2.46034	-4.64927e-05	2.46034	-0.00178	2.46677	-0.01933	2.46677	-0.02807	2.46677	-0.02524	2.46677	0.0056	2.46677	-0.00264	2.46677	0.01895	2.46677	0.03646
2.46211	0.00193	2.46211	0.000408596	2.46211	-0.00182	2.46855	-0.01824	2.46855	-0.02551	2.46855	-0.0172	2.46855	0.00835	2.46855	-0.00391	2.46855	0.01252	2.46855	0.03883
2.46389	0.00192	2.46389	0.000832979	2.46389	-0.00175	2.47032	-0.01525	2.47032	-0.01893	2.47032	-0.01433	2.47032	0.00253	2.47032	-0.00316	2.47032	0.00735	2.47032	0.03574
2.46566	0.00177	2.46566	0.00133	2.46566	-0.00157	2.4721	-0.01607	2.4721	-0.01964	2.4721	-0.01002	2.4721	-0.00198	2.4721	-0.0081	2.4721	0.00586	2.4721	0.03513
2.46743	0.00154	2.46743	0.00157	2.46743	-0.00134	2.47388	-0.016	2.47388	-0.01863	2.47388	-0.00738	2.47388	-0.00211	2.47388	-0.00687	2.47388	0.00265	2.47388	0.03158
2.4692	0.00131	2.4692	0.00175	2.4692	-0.0015	2.47566	-0.01863	2.47566	-0.01716	2.47566	-0.00603	2.47566	-0.00174	2.47566	-0.00673	2.47566	0.00232	2.47566	0.03462
2.47098	0.00095808	2.47098	0.00208	2.47098	-0.0017	2.47743	-0.02243	2.47743	-0.01592	2.47743	-0.00616	2.47743	0.0034	2.47743	-0.0064	2.47743	0.000994101	2.47743	0.03285
2.47275	0.000775686	2.47275	0.00212	2.47275	-0.00142	2.47921	-0.02415	2.47921	-0.01644	2.47921	-0.00967	2.47921	0.00636	2.47921	-0.00301	2.47921	0.00915	2.47921	0.02521
2.47452	0.000604682	2.47452	0.00178	2.47452	-0.00117	2.48099	-0.03006	2.48099	-0.01673	2.48099	-0.01016	2.48099	0.01511	2.48099	0.00226	2.48099	0.01762	2.48099	0.02565
2.4763	0.000606239	2.4763	0.00162	2.4763	-0.00104	2.48277	-0.03387	2.48277	-0.01511	2.48277	-0.0115	2.48277	0.01777	2.48277	0.0033	2.48277	0.02089	2.48277	0.01992
2.47807	0.00044959	2.47807	0.0016	2.47807	-0.00091515	2.48454	-0.03268	2.48454	-0.01502	2.48454	-0.01237	2.48454	0.01314	2.48454	0.000639687	2.48454	0.02135	2.48454	0.01568
2.47984	0.000507265	2.47984	0.00158	2.47984	-0.000791898	2.48632	-0.03196	2.48632	-0.01522	2.48632	-0.01391	2.48632	0.01346	2.48632	0.00317	2.48632	0.0214	2.48632	0.01108
2.48161	0.000812467	2.48161	0.00166	2.48161	-0.000465104	2.4881	-0.03208	2.4881	-0.01416	2.4881	-0.01817	2.4881	0.00867	2.4881	0.00434	2.4881	0.02362	2.4881	0.00763
2.48339	0.000885469	2.48339	0.0015	2.48339	-0.000615988	2.48988	-0.02861	2.48988	-0.01366	2.48988	-0.02132	2.48988	0.00372	2.48988	0.00118	2.48988	0.02133	2.48988	0.00555
2.48516	0.000879393	2.48516	0.0015	2.48516	-0.000869427	2.49165	-0.02326	2.49165	-0.01537	2.49165	-0.02799	2.49165	-0.00433	2.49165	0.000407846	2.49165	0.01312	2.49165	0.0067
2.48693	0.000994452	2.48693	0.00146	2.48693	-0.000990474	2.49343	-0.01988	2.49343	-0.01342	2.49343	-0.02914	2.49343	-0.01436	2.49343	-0.000935483	2.49343	0.00875	2.49343	0.00107
2.4887	0.00106	2.4887	0.0016	2.4887	-0.00121	2.49521	-0.02166	2.49521	-0.01514	2.49521	-0.03293	2.49521	-0.01686	2.49521	-0.00258	2.49521	0.00912	2.49521	0.000446581
2.49048	0.00101	2.49048	0.00165	2.49048	-0.0014	2.49698	-0.02193	2.49698	-0.01595	2.49698	-0.0357	2.49698	-0.01857	2.49698	-0.00358	2.49698	0.01055	2.49698	-0.0037
2.49225	0.00126	2.49225	0.00182	2.49225	-0.00129	2.49876	-0.02266	2.49876	-0.01417	2.49876	-0.03739	2.49876	-0.02059	2.49876	-0.00209	2.49876	0.00844	2.49876	-0.00318
2.49402	0.00158	2.49402	0.00221	2.49402	-0.000843308	2.50054	-0.02555	2.50054	-0.01454	2.50054	-0.03897	2.50054	-0.02108	2.50054	-0.00189	2.50054	0.00397	2.50054	0.00414
2.49579	0.00165	2.49579	0.00249	2.49579	-0.000423338	2.50232	-0.02725	2.50232	-0.01245	2.50232	-0.03708	2.50232	-0.01769	2.50232	-0.0019	2.50232	0.01361	2.50232	0.00793
2.49757	0.00151	2.49757	0.00233	2.49757	-0.000150941	2.50409	-0.02942	2.50409	-0.01155	2.50409	-0.04165	2.50409	-0.01417	2.50409	-0.00104	2.50409	0.01672	2.50409	0.01852
2.49934	0.00138	2.49934	0.0021	2.49934	-0.000190824	2.50587	-0.03293	2.50587	-0.00827	2.50587	-0.04059	2.50587	-0.01729	2.50587	0.000772096	2.50587	0.01215	2.50587	0.02872
2.50111	0.00147	2.50111	0.00192	2.50111	-0.000319765	2.50765	-0.03318	2.50765	-0.00379	2.50765	-0.03901	2.50765	-0.0178	2.50765	0.00206	2.50765	0.00379	2.50765	0.03741
2.50288	0.00149	2.50288	0.00167	2.50288	-0.00063271	2.50943	-0.03007	2.50943	-0.00783	2.50943	-0.03405	2.50943	-0.01129	2.50943	-0.00152	2.50943	0.00112	2.50943	0.04297
2.50466	0.00146	2.50466	0.00152	2.50466	-0.000945654	2.5112	-0.02836	2.5112	-0.00748	2.5112	-0.03162	2.5112	-0.00732	2.5112	0.0031	2.5112	0.0025	2.5112	0.03842
2.50643	0.00147	2.50643	0.00136	2.50643	-0.00103	2.51298	-0.02805	2.51298	-0.00544	2.51298	-0.03046	2.51298	-0.00983	2.51298	0.00533	2.51298	-0.00396	2.51298	0.03575
2.5082	0.00117	2.5082	0.00134	2.5082	-0.000989922	2.51476	-0.02363	2.51476	-0.00479	2.51476	-0.02455	2.51476	-0.00947	2.51476	0.00676	2.51476	-0.00978	2.51476	0.0291
2.50997	0.00102	2.50997	0.00131	2.50997	-0.000745537	2.51653	-0.0249	2.51653	-0.00817	2.51653	-0.01857	2.51653	-0.00377	2.51653	0.00827	2.51653	-0.0103	2.51653	0.01702
2.51175	0.000836983	2.51175	0.00121	2.51175	-0.000467111	2.51831	-0.02638	2.51831	-0.00969	2.51831	-0.0185	2.51831	-0.00267	2.51831	0.00651	2.51831	-0.0105	2.51831	0.01116
2.51352	0.000654881	2.51352	0.00109	2.51352	-0.000614219	2.52009	-0.02698	2.52009	-0.00688	2.52009	-0.02141	2.52009	-0.0042	2.52009	0.00553	2.52009	-0.00421	2.52009	0.00145
2.51529	0.000712031	2.51529	0.000951748	2.51529	-0.000816685	2.52186	-0.02693	2.52186	-0.01132	2.52186	-0.02398	2.52186	-0.00174	2.52186	0.0055	2.52186	0.00119	2.52186	-0.0034
2.51706	0.000831512	2.51706	0.000700217	2.51706	-0.00108	2.52364	-0.02494	2.52364	-0.01106	2.52364	-0.02366	2.52364	-0.00216	2.52364	0.00322	2.52364	0.00669	2.52364	-0.00951
2.51884	0.000827403	2.51884	0.000571505	2.51884	-0.00151	2.52542	-0.0277	2.52542	-0.00837	2.52542	-0.02948	2.52542	-0.0048	2.52542	0.00303	2.52542	0.00764	2.52542	-0.01096
2.52061	0.000752748	2.52061	0.000326586	2.52061	-0.00202	2.5272	-0.02644	2.5272	-0.00902	2.5272	-0.03565	2.5272	-0.00729	2.5272	0.00374	2.5272	0.0093	2.5272	-0.00418
2.52238	0.000632821	2.52238	0.000153495	2.52238	-0.00271	2.52897	-0.02434	2.52897	-0.0078	2.52897	-0.03762	2.52897	-0.0087	2.52897	0.00318	2.52897	0.01023	2.52897	-0.00734
2.52415	0.000681246	2.52415	0.000136991	2.52415	-0.00329	2.53075	-0.02487	2.53075	-0.00634	2.53075	-0.03798	2.53075	-0.01415	2.53075	-0.000123218	2.53075	0.01473	2.53075	-0.00212
2.52593	0.000781137	2.52593	0.000126572	2.52593	-0.00394	2.53253	-0.02648	2.53253	-0.00764	2.53253	-0.03736	2.53253	-0.01265	2.53253	-0.00367	2.53253	0.01036	2.53253	0.00236
2.5277	0.000683564	2.5277	0.000248805	2.5277	-0.00427	2.5343	-0.02726	2.5343	-0.01564	2.5343	-0.03662	2.5343	-0.00326	2.5343	-0.00853	2.5343	0.00286	2.5343	0.00425
2.52947	0.000677858	2.52947	0.00042814	2.52947	-0.00387	2.53608	-0.02682	2.53608	-0.01887	2.53608	-0.03162	2.53608	0.000336967	2.53608	-0.01318	2.53608	0.00667	2.53608	-0.00056591
2.53124	0.000727725	2.53124	0.000569626	2.53124	-0.00308	2.53786	-0.02523	2.53786	-0.02234	2.53786	-0.02688	2.53786	0.000270807	2.53786	-0.01545	2.53786	0.00394	2.53786	-0.01003
2.53301	0.00078141	2.53301	0.00044004	2.53301	-0.0022	2.53963	-0.02425	2.53963	-0.0313	2.53963	-0.02245	2.53963	0.00692	2.53963	-0.01353	2.53963	0.00149	2.53963	-0.01309
2.53479	0.000858344	2.53479	0.000210935	2.53479	-0.00136	2.54141	-0.02654	2.54141	-0.03831	2.54141	-0.02191	2.54141	0.01089	2.54141	-0.01005	2.54141	0.0047	2.54141	-0.02087
2.53656	0.000992272	2.53656	0.000130988	2.53656	-0.000807487	2.54319	-0.02528	2.54319	-0.03929	2.54319	-0.01724	2.54319	0.0068	2.54319	-0.00329	2.54319	0.00654	2.54319	-0.02671
2.53833	0.00123	2.53833	0.000217415	2.53833	-0.000480379	2.54496	-0.02155	2.54496	-0.04154	2.54496	-0.01218	2.54496	0.000147837	2.54496	0.00615	2.54496	0.01433	2.54496	-0.02891
2.5401	0.00146	2.5401	0.000419173	2.5401	-0.000248532	2.54674	-0.01853	2.54674	-0.0432	2.54674	-0.01072	2.54674	0.00131	2.54674	0.01059	2.54674	0.01873	2.54674	-0.02763
2.54187	0.00145	2.54187	0.000394473	2.54187	-0.000250044	2.54852	-0.01494	2.54852	-0.04205	2.54852	-0.01188	2.54852	0.00321	2.54852	0.01309	2.54852	0.0216	2.54852	-0.02782
2.54365	0.00137	2.54365	0.000511049	2.54365	-0.000229898	2.55029	-0.0107	2.55029	-0.03685	2.55029	-0.01301	2.55029	-0.000760855	2.55029	0.01675	2.55029	0.02357	2.55029	-0.03058
2.54542	0.00141	2.54542	0.000423748	2.54542	-0.000377529	2.55207	-0.00763	2.55207	-0.03293	2.55207	-0.00944	2.55207	0.000697891	2.55207	0.0219	2.55207	0.02784	2.55207	-0.02396
2.54719	0.00153	2.54719	0.000362974	2.54719	-0.000679878	2.55385	-0.00962	2.55385	-0.03091	2.55385	-0.01048	2.55385	-0.00193	2.55385	0.02766	2.55385	0.03081	2.55385	-0.01564
2.54896	0.00176	2.54896	0.000265998	2.54896	-0.00088049	2.55562	-0.00854	2.55562	-0.02526	2.55562	-0.00827	2.55562	0.00275	2.55562	0.02864	2.55562	0.02692	2.55562	-0.01398
2.55073	0.00184	2.55073	0.000321746	2.55073	-0.00131	2.5574	-0.00838	2.5574	-0.02556	2.5574	-0.00191	2.5574	0.00276	2.5574	0.02489	2.5574	0.02082	2.5574	-0.00808
2.55251	0.00196	2.55251	0.000527549	2.55251	-0.00209	2.55918	-0.00741	2.55918	-0.02231	2.55918	-0.0038	2.55918	0.00243	2.55918	0.02127	2.55918	0.01895	2.55918	-0.00242
2.55428	0.00208	2.55428	0.000822665	2.55428	-0.00277	2.56095	-0.00935	2.56095	-0.01958	2.56095	-0.000120423	2.56095	0.00367	2.56095	0.01609	2.56095	0.0168	2.56095	-0.00196
2.55605	0.00214	2.55605	0.00103	2.55605	-0.00324	2.56273	-0.00722	2.56273	-0.01551	2.56273	0.0081	2.56273	-0.000223354	2.56273	0.01321	2.56273	0.00422	2.56273	-0.00111
2.55782	0.00212	2.55782	0.00112	2.55782	-0.00353	2.56451	-0.00859	2.56451	-0.01385	2.56451	0.01339	2.56451	0.00424	2.56451	0.00892	2.56451	-0.00154	2.56451	0.00181
2.55959	0.00185	2.55959	0.00123	2.55959	-0.0038	2.56628	-0.01196	2.56628	-0.01454	2.56628	0.01078	2.56628	0.009	2.56628	0.00596	2.56628	-0.00431	2.56628	0.00414
2.56137	0.00145	2.56137	0.00136	2.56137	-0.00363	2.56806	-0.0117	2.56806	-0.00979	2.56806	0.00603	2.56806	0.00803	2.56806	0.00778	2.56806	0.000126939	2.56806	0.00155
2.56314	0.00137	2.56314	0.0014	2.56314	-0.00321	2.56984	-0.01235	2.56984	-0.00944	2.56984	0.00837	2.56984	0.01037	2.56984	0.00589	2.56984	0.00504	2.56984	0.00651
2.56491	0.00141	2.56491	0.00143	2.56491	-0.00287	2.57161	-0.00932	2.57161	-0.01187	2.57161	0.000217682	2.57161	0.01912	2.57161	0.00711	2.57161	0.00868	2.57161	0.00955
2.56668	0.00142	2.56668	0.00127	2.56668	-0.00246	2.57339	-0.01059	2.57339	-0.01119	2.57339	-0.00632	2.57339	0.02156	2.57339	0.000946474	2.57339	0.01051	2.57339	0.00599
2.56845	0.00129	2.56845	0.00113	2.56845	-0.00182	2.57516	-0.0069	2.57516	-0.01091	2.57516	-0.00965	2.57516	0.02554	2.57516	-0.00125	2.57516	0.01298	2.57516	0.00815
2.57022	0.00126	2.57022	0.000775589	2.57022	-0.00142	2.57694	-0.00204	2.57694	-0.01195	2.57694	-0.01455	2.57694	0.01919	2.57694	0.00061537	2.57694	0.01777	2.57694	0.00758
2.572	0.00142	2.572	0.000251847	2.572	-0.00137	2.57872	-0.00381	2.57872	-0.01205	2.57872	-0.01955	2.57872	0.01665	2.57872	-0.002	2.57872	0.01161	2.57872	0.00929
2.57377	0.00175	2.57377	-5.31048e-05	2.57377	-0.00113	2.58049	-0.00436	2.58049	-0.01315	2.58049	-0.02352	2.58049	0.01584	2.58049	-0.000918191	2.58049	0.00958	2.58049	0.00717
2.57554	0.00203	2.57554	-0.000163704	2.57554	-0.000827224	2.58227	-0.00302	2.58227	-0.0147	2.58227	-0.02744	2.58227	0.00544	2.58227	0.00268	2.58227	0.01211	2.58227	0.00704
2.57731	0.0022	2.57731	-7.59525e-05	2.57731	-0.000918194	2.58405	0.0007325	2.58405	-0.01629	2.58405	-0.02599	2.58405	-0.00414	2.58405	0.00833	2.58405	0.00614	2.58405	0.00879
2.57908	0.00222	2.57908	0.000156667	2.57908	-0.00126	2.58582	-0.00117	2.58582	-0.01514	2.58582	-0.01894	2.58582	-0.00886	2.58582	0.00568	2.58582	0.000766796	2.58582	0.00333
2.58085	0.00203	2.58085	0.000230955	2.58085	-0.00156	2.5876	-0.00113	2.5876	-0.01299	2.5876	-0.01886	2.5876	-0.01357	2.5876	0.0064	2.5876	-0.00368	2.5876	0.00322
2.58263	0.00213	2.58263	0.00048878	2.58263	-0.00172	2.58938	0.00249	2.58938	-0.01474	2.58938	-0.01573	2.58938	-0.02153	2.58938	0.00741	2.58938	-0.00446	2.58938	0.00543
2.5844	0.00222	2.5844	0.000686176	2.5844	-0.00163	2.59115	0.00231	2.59115	-0.01207	2.59115	-0.01173	2.59115	-0.02538	2.59115	0.00463	2.59115	-0.00744	2.59115	0.00667
2.58617	0.00239	2.58617	0.000397064	2.58617	-0.00171	2.59293	0.00217	2.59293	-0.01183	2.59293	-0.008	2.59293	-0.02301	2.59293	-0.000872074	2.59293	-0.01433	2.59293	0.00751
2.58794	0.00256	2.58794	8.85679e-05	2.58794	-0.00181	2.5947	0.00334	2.5947	-0.01225	2.5947	-0.01051	2.5947	-0.01836	2.5947	-0.00589	2.5947	-0.01603	2.5947	0.00742
2.58971	0.0026	2.58971	-0.000204113	2.58971	-0.00211	2.59648	0.00435	2.59648	-0.01327	2.59648	-0.01379	2.59648	-0.01497	2.59648	-0.00854	2.59648	-0.01141	2.59648	0.0105
2.59148	0.00252	2.59148	-0.000410184	2.59148	-0.00241	2.59826	-0.000148533	2.59826	-0.0156	2.59826	-0.000873135	2.59826	-0.0042	2.59826	-0.01272	2.59826	-0.01229	2.59826	0.0109
2.59326	0.00256	2.59326	-0.000460561	2.59326	-0.00254	2.60003	-0.00463	2.60003	-0.01982	2.60003	0.00635	2.60003	0.00754	2.60003	-0.01253	2.60003	-0.01024	2.60003	0.01048
2.59503	0.00255	2.59503	-0.000497693	2.59503	-0.00267	2.60181	-0.00751	2.60181	-0.02142	2.60181	0.00934	2.60181	0.00962	2.60181	-0.01207	2.60181	-0.00676	2.60181	0.01108
2.5968	0.00256	2.5968	-0.000478545	2.5968	-0.00255	2.60358	-0.01371	2.60358	-0.0166	2.60358	0.01078	2.60358	0.01277	2.60358	-0.01392	2.60358	-0.00666	2.60358	0.00602
2.59857	0.00251	2.59857	-0.00056624	2.59857	-0.00225	2.60536	-0.01977	2.60536	-0.01635	2.60536	0.01201	2.60536	0.01244	2.60536	-0.01356	2.60536	-0.00285	2.60536	0.00659
2.60034	0.00251	2.60034	-0.000720714	2.60034	-0.00224	2.60714	-0.02233	2.60714	-0.01108	2.60714	0.00235	2.60714	0.00941	2.60714	-0.01393	2.60714	-0.00763	2.60714	0.01134
2.60211	0.00264	2.60211	-0.0009536	2.60211	-0.00196	2.60891	-0.02615	2.60891	-0.00317	2.60891	-0.00884	2.60891	0.01012	2.60891	-0.01315	2.60891	-0.00974	2.60891	0.01099
2.60388	0.00289	2.60388	-0.000947783	2.60388	-0.00175	2.61069	-0.03021	2.61069	0.00517	2.61069	-0.01821	2.61069	0.00732	2.61069	-0.00921	2.61069	-0.00841	2.61069	0.01101
2.60566	0.00309	2.60566	-0.000629952	2.60566	-0.00172	2.61246	-0.02949	2.61246	0.00777	2.61246	-0.02168	2.61246	0.00839	2.61246	-0.00726	2.61246	-0.01154	2.61246	0.00876
2.60743	0.00302	2.60743	-6.84413e-05	2.60743	-0.00186	2.61424	-0.03144	2.61424	0.01248	2.61424	-0.02797	2.61424	0.00965	2.61424	-0.00259	2.61424	-0.00498	2.61424	0.01055
2.6092	0.00266	2.6092	0.000298658	2.6092	-0.00204	2.61602	-0.03122	2.61602	0.01922	2.61602	-0.03423	2.61602	0.01056	2.61602	-0.00126	2.61602	-0.000137851	2.61602	0.00547
2.61097	0.00228	2.61097	0.000437027	2.61097	-0.00191	2.61779	-0.03244	2.61779	0.0195	2.61779	-0.0332	2.61779	0.01241	2.61779	0.000128442	2.61779	0.00416	2.61779	0.000348445
2.61274	0.00207	2.61274	0.00054297	2.61274	-0.00187	2.61957	-0.03048	2.61957	0.01788	2.61957	-0.03423	2.61957	0.00581	2.61957	0.00211	2.61957	0.01261	2.61957	-0.00103
2.61451	0.00211	2.61451	0.000603055	2.61451	-0.00195	2.62134	-0.02454	2.62134	0.01772	2.62134	-0.03561	2.62134	0.00285	2.62134	-0.00231	2.62134	0.01513	2.62134	-0.00164
2.61628	0.00205	2.61628	0.000508482	2.61628	-0.00209	2.62312	-0.02295	2.62312	0.0162	2.62312	-0.03404	2.62312	0.0011	2.62312	-0.0054	2.62312	0.01438	2.62312	0.000778708
2.61805	0.00195	2.61805	0.000276868	2.61805	-0.00217	2.6249	-0.01981	2.6249	0.0121	2.6249	-0.02447	2.6249	-0.00379	2.6249	-0.00683	2.6249	0.0149	2.6249	0.00318
2.61983	0.00185	2.61983	0.000200172	2.61983	-0.00213	2.62667	-0.01359	2.62667	0.01159	2.62667	-0.01545	2.62667	-0.00593	2.62667	-0.0076	2.62667	0.01297	2.62667	0.00906
2.6216	0.00194	2.6216	0.00018716	2.6216	-0.00204	2.62845	-0.0128	2.62845	0.01069	2.62845	-0.01124	2.62845	-0.01117	2.62845	-0.01046	2.62845	0.00745	2.62845	0.02373
2.62337	0.00209	2.62337	0.000244524	2.62337	-0.00188	2.63022	-0.00974	2.63022	0.01043	2.63022	-0.00645	2.63022	-0.00995	2.63022	-0.01366	2.63022	-0.00371	2.63022	0.02726
2.62514	0.00229	2.62514	0.000261291	2.62514	-0.00132	2.632	-0.00926	2.632	0.00755	2.632	-0.00075992	2.632	-0.0036	2.632	-0.01063	2.632	-0.00266	2.632	0.02814
2.62691	0.00252	2.62691	0.000435675	2.62691	-0.000891143	2.63378	-0.00891	2.63378	0.00339	2.63378	0.00241	2.63378	-0.01149	2.63378	-0.00886	2.63378	0.000342737	2.63378	0.03235
2.62868	0.00264	2.62868	0.000525038	2.62868	-0.000700785	2.63555	-0.0097	2.63555	-0.000835022	2.63555	-0.00283	2.63555	-0.00667	2.63555	-0.0095	2.63555	-8.60806e-05	2.63555	0.0353
2.63045	0.0028	2.63045	0.000549263	2.63045	-0.000727751	2.63733	-0.01314	2.63733	-0.00697	2.63733	-0.00475	2.63733	-0.000569673	2.63733	-0.00586	2.63733	0.00148	2.63733	0.02349
2.63222	0.00301	2.63222	0.000741554	2.63222	-0.000671203	2.6391	-0.0086	2.6391	-0.01109	2.6391	-0.00561	2.6391	-0.00037096	2.6391	-0.00443	2.6391	0.00834	2.6391	0.00816
2.63399	0.00305	2.63399	0.00101	2.63399	-0.000829545	2.64088	-0.01367	2.64088	-0.01715	2.64088	-0.00612	2.64088	-0.00386	2.64088	-0.00144	2.64088	0.01333	2.64088	-0.00372
2.63577	0.00312	2.63577	0.00138	2.63577	-0.000832008	2.64265	-0.01573	2.64265	-0.01965	2.64265	-0.00767	2.64265	-0.00845	2.64265	-0.00603	2.64265	0.01344	2.64265	-0.01437
2.63754	0.00323	2.63754	0.00169	2.63754	-0.000657678	2.64443	-0.01392	2.64443	-0.02199	2.64443	-0.00951	2.64443	-0.00107	2.64443	-0.00538	2.64443	0.01756	2.64443	-0.02501
2.63931	0.00352	2.63931	0.00208	2.63931	5.10874e-05	2.6462	-0.01657	2.6462	-0.02499	2.6462	-0.00755	2.6462	-0.00261	2.6462	-0.00517	2.6462	0.0238	2.6462	-0.02723
2.64108	0.00388	2.64108	0.00255	2.64108	0.000476803	2.64798	-0.01729	2.64798	-0.02733	2.64798	-0.01126	2.64798	-0.00983	2.64798	-0.01112	2.64798	0.03072	2.64798	-0.02361
2.64285	0.00415	2.64285	0.00297	2.64285	0.000647947	2.64976	-0.01833	2.64976	-0.0287	2.64976	-0.01006	2.64976	-0.00874	2.64976	-0.00928	2.64976	0.03639	2.64976	-0.02214
2.64462	0.00451	2.64462	0.00325	2.64462	0.00118	2.65153	-0.01554	2.65153	-0.02814	2.65153	-0.00738	2.65153	-0.01014	2.65153	-0.00639	2.65153	0.04143	2.65153	-0.02356
2.64639	0.00473	2.64639	0.00336	2.64639	0.00124	2.65331	-0.01627	2.65331	-0.02743	2.65331	-0.000835103	2.65331	-0.0103	2.65331	-0.00588	2.65331	0.04216	2.65331	-0.01913
2.64816	0.00474	2.64816	0.00327	2.64816	0.00122	2.65508	-0.0184	2.65508	-0.02639	2.65508	0.00358	2.65508	-0.01302	2.65508	-0.00878	2.65508	0.0335	2.65508	-0.0141
2.64993	0.00474	2.64993	0.00319	2.64993	0.00136	2.65686	-0.01424	2.65686	-0.01838	2.65686	-0.00317	2.65686	-0.01401	2.65686	-0.00617	2.65686	0.02583	2.65686	-0.01321
2.6517	0.00505	2.6517	0.00347	2.6517	0.00183	2.65863	-0.01177	2.65863	-0.01241	2.65863	-0.00499	2.65863	-0.01146	2.65863	-0.003	2.65863	0.02192	2.65863	-0.01005
2.65347	0.00531	2.65347	0.00386	2.65347	0.00202	2.66041	-0.01015	2.66041	-0.00831	2.66041	-0.01393	2.66041	-0.01392	2.66041	-0.00495	2.66041	0.01376	2.66041	-0.00559
2.65525	0.00548	2.65525	0.004	2.65525	0.00198	2.66218	-0.00737	2.66218	-0.00169	2.66218	-0.02237	2.66218	-0.01385	2.66218	-0.00689	2.66218	0.01389	2.66218	0.000731018
2.65702	0.00577	2.65702	0.00395	2.65702	0.0018	2.66396	-0.00601	2.66396	0.00454	2.66396	-0.02714	2.66396	-0.01	2.66396	-0.00625	2.66396	0.01687	2.66396	0.00152
2.65879	0.0063	2.65879	0.00397	2.65879	0.00174	2.66574	-0.00546	2.66574	0.00841	2.66574	-0.03474	2.66574	-0.01028	2.66574	-0.00675	2.66574	0.01858	2.66574	-0.00443
2.66056	0.00672	2.66056	0.00398	2.66056	0.0018	2.66751	-0.00265	2.66751	0.00849	2.66751	-0.03215	2.66751	-0.01331	2.66751	-0.01066	2.66751	0.02356	2.66751	-0.00588
2.66233	0.00691	2.66233	0.0041	2.66233	0.002	2.66929	0.00023221	2.66929	0.00815	2.66929	-0.03159	2.66929	-0.00725	2.66929	-0.01436	2.66929	0.03043	2.66929	-0.0064
2.6641	0.00725	2.6641	0.00438	2.6641	0.0024	2.67106	0.000434342	2.67106	0.00764	2.67106	-0.03025	2.67106	-0.00142	2.67106	-0.01168	2.67106	0.03137	2.67106	-0.00841
2.66587	0.00783	2.66587	0.00476	2.66587	0.00259	2.67284	0.00401	2.67284	0.00765	2.67284	-0.02703	2.67284	0.00349	2.67284	-0.01271	2.67284	0.0338	2.67284	-0.00381
2.66764	0.00867	2.66764	0.00523	2.66764	0.00278	2.67461	0.00396	2.67461	0.0073	2.67461	-0.02498	2.67461	0.00115	2.67461	-0.0091	2.67461	0.04565	2.67461	-0.00205
2.66941	0.00981	2.66941	0.00587	2.66941	0.00291	2.67639	0.00302	2.67639	0.00378	2.67639	-0.02217	2.67639	0.00297	2.67639	-0.00275	2.67639	0.05656	2.67639	0.00681
2.67118	0.011	2.67118	0.00647	2.67118	0.0033	2.67816	0.000668735	2.67816	0.00409	2.67816	-0.02411	2.67816	0.00378	2.67816	0.00319	2.67816	0.06134	2.67816	0.01606
2.67295	0.01223	2.67295	0.00692	2.67295	0.0038	2.67994	0.00197	2.67994	0.00683	2.67994	-0.01756	2.67994	0.00152	2.67994	0.01508	2.67994	0.06449	2.67994	0.0188
2.67472	0.01349	2.67472	0.00716	2.67472	0.0041	2.68171	0.00465	2.68171	0.00781	2.68171	-0.01607	2.68171	-0.00321	2.68171	0.02109	2.68171	0.08128	2.68171	0.02395
2.67649	0.01515	2.67649	0.00754	2.67649	0.00499	2.68349	0.00288	2.68349	0.00649	2.68349	-0.0124	2.68349	-0.01244	2.68349	0.02349	2.68349	0.09404	2.68349	0.03377
2.67826	0.01745	2.67826	0.00787	2.67826	0.0059	2.68526	0.0014	2.68526	0.00744	2.68526	-0.01229	2.68526	-0.01491	2.68526	0.02487	2.68526	0.11094	2.68526	0.0516
2.68003	0.02004	2.68003	0.00808	2.68003	0.00688	2.68704	0.00159	2.68704	0.00833	2.68704	-0.01186	2.68704	-0.01588	2.68704	0.02679	2.68704	0.1312	2.68704	0.05817
2.68181	0.02328	2.68181	0.00875	2.68181	0.00791	2.68881	0.00277	2.68881	0.00998	2.68881	-0.00773	2.68881	-0.01341	2.68881	0.03166	2.68881	0.15599	2.68881	0.07045
2.68358	0.02728	2.68358	0.00967	2.68358	0.00854	2.69059	-5.89782e-05	2.69059	0.00505	2.69059	-0.01198	2.69059	-0.01168	2.69059	0.03976	2.69059	0.18233	2.69059	0.08821
2.68535	0.03218	2.68535	0.01053	2.68535	0.00904	2.69236	-0.00313	2.69236	0.000460691	2.69236	-0.01418	2.69236	-0.00712	2.69236	0.0459	2.69236	0.20836	2.69236	0.0981
2.68712	0.03864	2.68712	0.01129	2.68712	0.00919	2.69414	-0.00398	2.69414	0.00105	2.69414	-0.01585	2.69414	-0.00236	2.69414	0.05664	2.69414	0.22661	2.69414	0.10647
2.68889	0.0469	2.68889	0.01246	2.68889	0.00939	2.69591	-0.000893887	2.69591	0.000782581	2.69591	-0.01689	2.69591	-0.00487	2.69591	0.06332	2.69591	0.24531	2.69591	0.11924
2.69066	0.05735	2.69066	0.01388	2.69066	0.00993	2.69769	-0.00128	2.69769	-0.0035	2.69769	-0.02003	2.69769	-0.003	2.69769	0.06508	2.69769	0.26444	2.69769	0.12861
2.69243	0.07078	2.69243	0.01525	2.69243	0.01056	2.69946	-0.000473155	2.69946	-0.00798	2.69946	-0.02338	2.69946	-0.00607	2.69946	0.06398	2.69946	0.27583	2.69946	0.13301
2.6942	0.08848	2.6942	0.01671	2.6942	0.01157	2.70124	0.00122	2.70124	-0.0059	2.70124	-0.01834	2.70124	-0.0071	2.70124	0.06301	2.70124	0.28596	2.70124	0.13598
2.69597	0.1113	2.69597	0.01824	2.69597	0.01265	2.70301	0.0035	2.70301	-0.00745	2.70301	-0.01753	2.70301	-0.00476	2.70301	0.05501	2.70301	0.29027	2.70301	0.14478
2.69774	0.14109	2.69774	0.0197	2.69774	0.01398	2.70479	0.00389	2.70479	-0.01373	2.70479	-0.02047	2.70479	0.000420696	2.70479	0.04849	2.70479	0.28717	2.70479	0.15803
2.69951	0.17919	2.69951	0.02126	2.69951	0.01499	2.70656	0.00403	2.70656	-0.01352	2.70656	-0.02366	2.70656	0.00195	2.70656	0.0386	2.70656	0.27612	2.70656	0.162
2.70128	0.22467	2.70128	0.02318	2.70128	0.01602	2.70834	0.00107	2.70834	-0.01235	2.70834	-0.02473	2.70834	-0.00198	2.70834	0.02748	2.70834	0.26012	2.70834	0.16361
2.70305	0.27748	2.70305	0.0257	2.70305	0.01734	2.71011	-0.00399	2.71011	-0.01445	2.71011	-0.0273	2.71011	0.00271	2.71011	0.02019	2.71011	0.2429	2.71011	0.17341
2.70482	0.33558	2.70482	0.02891	2.70482	0.01896	2.71189	-0.00248	2.71189	-0.01231	2.71189	-0.0269	2.71189	0.00289	2.71189	0.01566	2.71189	0.2231	2.71189	0.17977
2.70659	0.39436	2.70659	0.03273	2.70659	0.02118	2.71366	-0.00471	2.71366	-0.00563	2.71366	-0.02867	2.71366	-0.000735535	2.71366	0.01085	2.71366	0.19867	2.71366	0.17357
2.70836	0.44782	2.70836	0.03741	2.70836	0.02349	2.71544	-0.0067	2.71544	-0.00114	2.71544	-0.03102	2.71544	-0.00292	2.71544	0.00328	2.71544	0.1739	2.71544	0.1607
2.71013	0.48771	2.71013	0.04365	2.71013	0.02577	2.71721	-0.00479	2.71721	-0.000236646	2.71721	-0.02315	2.71721	-0.00596	2.71721	0.00166	2.71721	0.15262	2.71721	0.15609
2.7119	0.50956	2.7119	0.05086	2.7119	0.02841	2.71899	-0.00229	2.71899	0.00425	2.71899	-0.02263	2.71899	-0.00881	2.71899	0.00236	2.71899	0.13351	2.71899	0.1558
2.71367	0.50858	2.71367	0.0594	2.71367	0.03142	2.72076	0.00168	2.72076	0.0027	2.72076	-0.02613	2.72076	-0.01553	2.72076	-0.00386	2.72076	0.11452	2.72076	0.14488
2.71544	0.48462	2.71544	0.07009	2.71544	0.03438	2.72254	0.00523	2.72254	0.000589113	2.72254	-0.02862	2.72254	-0.01846	2.72254	-0.00564	2.72254	0.09915	2.72254	0.14067
2.71721	0.44301	2.71721	0.08245	2.71721	0.03818	2.72431	0.00968	2.72431	-0.000622098	2.72431	-0.02705	2.72431	-0.01673	2.72431	-0.000171858	2.72431	0.09226	2.72431	0.13839
2.71898	0.38992	2.71898	0.09689	2.71898	0.04253	2.72609	0.01149	2.72609	-0.00164	2.72609	-0.02274	2.72609	-0.01166	2.72609	-0.00558	2.72609	0.08774	2.72609	0.12954
2.72075	0.3318	2.72075	0.11499	2.72075	0.04701	2.72786	0.01017	2.72786	-0.00512	2.72786	-0.02307	2.72786	-0.00826	2.72786	-0.0058	2.72786	0.08456	2.72786	0.12834
2.72252	0.27447	2.72252	0.13654	2.72252	0.05234	2.72964	0.01101	2.72964	-0.00711	2.72964	-0.01631	2.72964	-0.00522	2.72964	-0.00552	2.72964	0.0833	2.72964	0.13144
2.72429	0.22346	2.72429	0.16186	2.72429	0.0585	2.73141	0.01194	2.73141	-0.00608	2.73141	-0.01455	2.73141	-0.00513	2.73141	-0.00259	2.73141	0.08402	2.73141	0.12689
2.72606	0.18026	2.72606	0.19157	2.72606	0.0657	2.73318	0.01114	2.73318	-0.00601	2.73318	-0.01319	2.73318	-0.00585	2.73318	-0.00153	2.73318	0.08276	2.73318	0.12046
2.72783	0.14455	2.72783	0.22565	2.72783	0.0743	2.73496	0.0107	2.73496	-0.00795	2.73496	-0.0102	2.73496	-0.00793	2.73496	0.000263369	2.73496	0.07656	2.73496	0.11894
2.7296	0.11624	2.7296	0.26403	2.7296	0.08426	2.73673	0.01267	2.73673	-0.0061	2.73673	-0.01245	2.73673	-0.00575	2.73673	0.00645	2.73673	0.07623	2.73673	0.1192
2.73137	0.09334	2.73137	0.30752	2.73137	0.09565	2.73851	0.01666	2.73851	-0.00287	2.73851	-0.00954	2.73851	-0.0063	2.73851	0.00781	2.73851	0.06501	2.73851	0.11443
2.73314	0.0752	2.73314	0.35313	2.73314	0.10933	2.74028	0.01659	2.74028	-0.000865414	2.74028	-0.00808	2.74028	-0.00963	2.74028	0.01148	2.74028	0.0537	2.74028	0.11264
2.73491	0.06123	2.73491	0.39761	2.73491	0.12502	2.74206	0.01806	2.74206	0.00408	2.74206	-6.46948e-05	2.74206	-0.00491	2.74206	0.01215	2.74206	0.04758	2.74206	0.11218
2.73668	0.05042	2.73668	0.43866	2.73668	0.14264	2.74383	0.01596	2.74383	0.00393	2.74383	0.00696	2.74383	-0.00327	2.74383	0.01012	2.74383	0.03799	2.74383	0.10743
2.73845	0.04203	2.73845	0.47169	2.73845	0.16284	2.74561	0.01254	2.74561	0.00717	2.74561	0.00683	2.74561	-0.00612	2.74561	0.01481	2.74561	0.03047	2.74561	0.10655
2.74022	0.03525	2.74022	0.49414	2.74022	0.18672	2.74738	0.00908	2.74738	0.00868	2.74738	0.01084	2.74738	-0.00472	2.74738	0.01852	2.74738	0.02175	2.74738	0.10149
2.74199	0.02969	2.74199	0.50327	2.74199	0.21297	2.74916	0.000573297	2.74916	0.01014	2.74916	0.01535	2.74916	-9.12419e-06	2.74916	0.01862	2.74916	0.02925	2.74916	0.0908
2.74376	0.02529	2.74376	0.49782	2.74376	0.24308	2.75093	-0.00221	2.75093	0.01043	2.75093	0.01524	2.75093	0.00417	2.75093	0.01868	2.75093	0.03536	2.75093	0.08347
2.74553	0.02188	2.74553	0.47959	2.74553	0.27668	2.7527	-0.0035	2.7527	0.00591	2.7527	0.017	2.7527	0.00505	2.7527	0.01834	2.7527	0.03548	2.7527	0.07693
2.7473	0.01918	2.7473	0.45	2.7473	0.31236	2.75448	-0.00447	2.75448	0.00984	2.75448	0.01463	2.75448	0.01042	2.75448	0.01472	2.75448	0.04658	2.75448	0.08133
2.74907	0.01708	2.74907	0.41267	2.74907	0.34925	2.75625	-0.00181	2.75625	0.01216	2.75625	0.01516	2.75625	0.01345	2.75625	0.01115	2.75625	0.05534	2.75625	0.07521
2.75084	0.01553	2.75084	0.37113	2.75084	0.38635	2.75803	-0.00195	2.75803	0.01209	2.75803	0.016	2.75803	0.01417	2.75803	0.00892	2.75803	0.06094	2.75803	0.0766
2.75261	0.01428	2.75261	0.32729	2.75261	0.42225	2.7598	0.000950847	2.7598	0.01509	2.7598	0.02019	2.7598	0.01753	2.7598	0.01331	2.7598	0.05975	2.7598	0.07498
2.75438	0.0132	2.75438	0.28513	2.75438	0.45545	2.76158	0.00265	2.76158	0.01413	2.76158	0.02058	2.76158	0.01995	2.76158	0.0113	2.76158	0.06211	2.76158	0.07391
2.75615	0.0122	2.75615	0.24704	2.75615	0.48273	2.76335	0.00416	2.76335	0.01082	2.76335	0.01351	2.76335	0.02401	2.76335	0.01185	2.76335	0.06353	2.76335	0.07412
2.75792	0.01122	2.75792	0.21258	2.75792	0.50225	2.76512	0.00841	2.76512	0.00727	2.76512	0.02472	2.76512	0.02403	2.76512	0.01398	2.76512	0.06194	2.76512	0.07323
2.75969	0.01031	2.75969	0.18195	2.75969	0.51304	2.7669	0.00624	2.7669	0.00738	2.7669	0.02615	2.7669	0.02693	2.7669	0.01462	2.7669	0.0586	2.7669	0.07529
2.76146	0.00943	2.76146	0.15585	2.76146	0.51389	2.76867	0.00667	2.76867	0.01211	2.76867	0.0188	2.76867	0.02428	2.76867	0.02206	2.76867	0.05546	2.76867	0.07545
2.76323	0.00849	2.76323	0.13282	2.76323	0.50445	2.77045	0.00873	2.77045	0.01065	2.77045	0.01887	2.77045	0.02106	2.77045	0.03109	2.77045	0.05461	2.77045	0.08893
2.76499	0.00765	2.76499	0.11284	2.76499	0.48523	2.77222	0.00767	2.77222	0.01154	2.77222	0.02126	2.77222	0.02348	2.77222	0.03949	2.77222	0.05429	2.77222	0.09669
2.76676	0.00703	2.76676	0.09701	2.76676	0.45899	2.77399	0.00691	2.77399	0.01401	2.77399	0.0248	2.77399	0.02862	2.77399	0.05056	2.77399	0.05832	2.77399	0.11082
2.76853	0.00665	2.76853	0.08342	2.76853	0.42861	2.77577	0.00738	2.77577	0.01343	2.77577	0.02291	2.77577	0.03014	2.77577	0.06445	2.77577	0.07418	2.77577	0.12402
2.7703	0.0063	2.7703	0.07192	2.7703	0.39536	2.77754	0.01043	2.77754	0.01463	2.77754	0.02451	2.77754	0.0373	2.77754	0.07228	2.77754	0.09217	2.77754	0.12854
2.77207	0.00579	2.77207	0.06259	2.77207	0.36109	2.77932	0.01554	2.77932	0.01522	2.77932	0.02966	2.77932	0.04926	2.77932	0.07646	2.77932	0.09949	2.77932	0.14032
2.77384	0.00546	2.77384	0.05454	2.77384	0.32699	2.78109	0.01909	2.78109	0.01666	2.78109	0.0363	2.78109	0.0611	2.78109	0.08631	2.78109	0.11605	2.78109	0.15162
2.77561	0.00525	2.77561	0.04767	2.77561	0.29391	2.78287	0.02591	2.78287	0.01798	2.78287	0.04488	2.78287	0.07109	2.78287	0.10187	2.78287	0.13025	2.78287	0.1639
2.77738	0.00501	2.77738	0.04202	2.77738	0.26242	2.78464	0.03845	2.78464	0.0197	2.78464	0.04695	2.78464	0.08032	2.78464	0.1061	2.78464	0.13776	2.78464	0.17201
2.77915	0.00471	2.77915	0.03751	2.77915	0.23362	2.78641	0.04659	2.78641	0.02278	2.78641	0.05419	2.78641	0.0876	2.78641	0.11815	2.78641	0.14594	2.78641	0.17837
2.78092	0.00449	2.78092	0.0339	2.78092	0.20769	2.78819	0.05468	2.78819	0.02614	2.78819	0.06831	2.78819	0.09038	2.78819	0.1381	2.78819	0.1575	2.78819	0.18909
2.78269	0.00426	2.78269	0.03072	2.78269	0.18469	2.78996	0.06366	2.78996	0.0305	2.78996	0.07406	2.78996	0.09617	2.78996	0.14921	2.78996	0.16706	2.78996	0.18006
2.78446	0.00399	2.78446	0.02792	2.78446	0.16422	2.79173	0.07283	2.79173	0.03674	2.79173	0.07836	2.79173	0.1011	2.79173	0.15301	2.79173	0.16924	2.79173	0.18107
2.78623	0.00386	2.78623	0.02536	2.78623	0.14625	2.79351	0.08404	2.79351	0.0439	2.79351	0.09027	2.79351	0.10687	2.79351	0.15255	2.79351	0.17386	2.79351	0.18542
2.788	0.00382	2.788	0.02306	2.788	0.1301	2.79528	0.09399	2.79528	0.0488	2.79528	0.10599	2.79528	0.112	2.79528	0.15413	2.79528	0.17637	2.79528	0.18208
2.78977	0.0036	2.78977	0.021	2.78977	0.11537	2.79706	0.10178	2.79706	0.05495	2.79706	0.11704	2.79706	0.12147	2.79706	0.14078	2.79706	0.17759	2.79706	0.17785
2.79154	0.00329	2.79154	0.01915	2.79154	0.10267	2.79883	0.10995	2.79883	0.06025	2.79883	0.12823	2.79883	0.12644	2.79883	0.1297	2.79883	0.17533	2.79883	0.18137
2.7933	0.00326	2.7933	0.01759	2.7933	0.09141	2.8006	0.12056	2.8006	0.06693	2.8006	0.13701	2.8006	0.1252	2.8006	0.1251	2.8006	0.17125	2.8006	0.19124
2.79507	0.00316	2.79507	0.01633	2.79507	0.08131	2.80238	0.13172	2.80238	0.06912	2.80238	0.14409	2.80238	0.12825	2.80238	0.11356	2.80238	0.16326	2.80238	0.17942
2.79684	0.00317	2.79684	0.01522	2.79684	0.07263	2.80415	0.1475	2.80415	0.07978	2.80415	0.15036	2.80415	0.12381	2.80415	0.1105	2.80415	0.1569	2.80415	0.17201
2.79861	0.00329	2.79861	0.01419	2.79861	0.06491	2.80593	0.16559	2.80593	0.09458	2.80593	0.15891	2.80593	0.11784	2.80593	0.10546	2.80593	0.14314	2.80593	0.16174
2.80038	0.00338	2.80038	0.01306	2.80038	0.05854	2.8077	0.18583	2.8077	0.10363	2.8077	0.16247	2.8077	0.11087	2.8077	0.10423	2.8077	0.12955	2.8077	0.15667
2.80215	0.00345	2.80215	0.0121	2.80215	0.0529	2.80947	0.21021	2.80947	0.11719	2.80947	0.16703	2.80947	0.10782	2.80947	0.1039	2.80947	0.12094	2.80947	0.14196
2.80392	0.00328	2.80392	0.01108	2.80392	0.04801	2.81125	0.23896	2.81125	0.1291	2.81125	0.17989	2.81125	0.1086	2.81125	0.09844	2.81125	0.11007	2.81125	0.12446
2.80569	0.00309	2.80569	0.00991	2.80569	0.04347	2.81302	0.26617	2.81302	0.14853	2.81302	0.18514	2.81302	0.1047	2.81302	0.10265	2.81302	0.10314	2.81302	0.122
2.80746	0.00284	2.80746	0.00864	2.80746	0.03957	2.81479	0.30251	2.81479	0.16876	2.81479	0.18202	2.81479	0.10359	2.81479	0.09853	2.81479	0.09582	2.81479	0.11227
2.80923	0.0025	2.80923	0.00776	2.80923	0.03604	2.81657	0.33994	2.81657	0.18409	2.81657	0.18129	2.81657	0.09907	2.81657	0.09094	2.81657	0.09084	2.81657	0.10575
2.811	0.00257	2.811	0.00748	2.811	0.03281	2.81834	0.36834	2.81834	0.20125	2.81834	0.18574	2.81834	0.09287	2.81834	0.08103	2.81834	0.08351	2.81834	0.10031
2.81276	0.00271	2.81276	0.00688	2.81276	0.03017	2.82011	0.40226	2.82011	0.22502	2.82011	0.18681	2.82011	0.08238	2.82011	0.07108	2.82011	0.08273	2.82011	0.10277
2.81453	0.00279	2.81453	0.0063	2.81453	0.02796	2.82189	0.42995	2.82189	0.24625	2.82189	0.1842	2.82189	0.07147	2.82189	0.06622	2.82189	0.08192	2.82189	0.10066
2.8163	0.00264	2.8163	0.00591	2.8163	0.026	2.82366	0.44981	2.82366	0.26814	2.82366	0.18387	2.82366	0.06985	2.82366	0.05864	2.82366	0.07336	2.82366	0.09791
2.81807	0.00245	2.81807	0.00557	2.81807	0.02417	2.82544	0.46332	2.82544	0.28967	2.82544	0.19427	2.82544	0.06903	2.82544	0.05248	2.82544	0.07114	2.82544	0.09661
2.81984	0.00241	2.81984	0.00523	2.81984	0.02248	2.82721	0.46576	2.82721	0.3135	2.82721	0.1975	2.82721	0.07377	2.82721	0.0526	2.82721	0.07271	2.82721	0.08682
2.82161	0.00215	2.82161	0.00495	2.82161	0.02114	2.82898	0.46226	2.82898	0.33522	2.82898	0.19612	2.82898	0.08073	2.82898	0.05259	2.82898	0.06822	2.82898	0.07079
2.82338	0.00202	2.82338	0.0049	2.82338	0.02003	2.83076	0.44575	2.83076	0.36174	2.83076	0.19942	2.83076	0.08669	2.83076	0.04964	2.83076	0.06579	2.83076	0.05988
2.82515	0.00202	2.82515	0.00478	2.82515	0.0189	2.83253	0.42757	2.83253	0.38281	2.83253	0.20123	2.83253	0.08833	2.83253	0.04764	2.83253	0.06042	2.83253	0.04968
2.82691	0.00201	2.82691	0.00448	2.82691	0.01745	2.8343	0.40818	2.8343	0.39713	2.8343	0.19997	2.8343	0.0875	2.8343	0.04266	2.8343	0.05519	2.8343	0.03972
2.82868	0.00202	2.82868	0.0043	2.82868	0.01633	2.83608	0.3813	2.83608	0.41051	2.83608	0.19987	2.83608	0.08193	2.83608	0.03949	2.83608	0.04972	2.83608	0.03622
2.83045	0.00189	2.83045	0.00373	2.83045	0.01548	2.83785	0.35681	2.83785	0.41748	2.83785	0.21026	2.83785	0.07488	2.83785	0.03427	2.83785	0.04196	2.83785	0.03232
2.83222	0.00188	2.83222	0.00299	2.83222	0.01451	2.83962	0.33384	2.83962	0.41836	2.83962	0.22168	2.83962	0.0665	2.83962	0.02806	2.83962	0.04235	2.83962	0.03218
2.83399	0.00207	2.83399	0.00244	2.83399	0.01328	2.8414	0.3021	2.8414	0.40937	2.8414	0.22675	2.8414	0.06129	2.8414	0.02961	2.8414	0.04568	2.8414	0.03081
2.83576	0.00222	2.83576	0.00211	2.83576	0.012	2.84317	0.27378	2.84317	0.4065	2.84317	0.23444	2.84317	0.05681	2.84317	0.02795	2.84317	0.04237	2.84317	0.0346
2.83753	0.00235	2.83753	0.002	2.83753	0.01098	2.84494	0.25326	2.84494	0.39992	2.84494	0.24238	2.84494	0.05023	2.84494	0.02837	2.84494	0.03909	2.84494	0.03768
2.8393	0.00227	2.8393	0.00214	2.8393	0.01026	2.84672	0.22665	2.84672	0.3918	2.84672	0.25126	2.84672	0.05544	2.84672	0.03116	2.84672	0.03792	2.84672	0.04232
2.84106	0.00221	2.84106	0.00208	2.84106	0.0095	2.84849	0.2078	2.84849	0.3852	2.84849	0.26028	2.84849	0.05294	2.84849	0.03753	2.84849	0.03096	2.84849	0.05703
2.84283	0.002	2.84283	0.00183	2.84283	0.00851	2.85026	0.19256	2.85026	0.37017	2.85026	0.26833	2.85026	0.0539	2.85026	0.04391	2.85026	0.01989	2.85026	0.06079
2.8446	0.00186	2.8446	0.00169	2.8446	0.00772	2.85203	0.18255	2.85203	0.35825	2.85203	0.28024	2.85203	0.05558	2.85203	0.04611	2.85203	0.01983	2.85203	0.06678
2.84637	0.00197	2.84637	0.00177	2.84637	0.0072	2.85381	0.17329	2.85381	0.34399	2.85381	0.29648	2.85381	0.0553	2.85381	0.05298	2.85381	0.02674	2.85381	0.07897
2.84814	0.00182	2.84814	0.00173	2.84814	0.00705	2.85558	0.16121	2.85558	0.32884	2.85558	0.31014	2.85558	0.06165	2.85558	0.05193	2.85558	0.02533	2.85558	0.08264
2.84991	0.00165	2.84991	0.00155	2.84991	0.00645	2.85735	0.1534	2.85735	0.30947	2.85735	0.32083	2.85735	0.06091	2.85735	0.04751	2.85735	0.02876	2.85735	0.08247
2.85168	0.00157	2.85168	0.00125	2.85168	0.00565	2.85913	0.14835	2.85913	0.29151	2.85913	0.33847	2.85913	0.06582	2.85913	0.04829	2.85913	0.03554	2.85913	0.08074
2.85344	0.00163	2.85344	0.000922156	2.85344	0.00505	2.8609	0.14182	2.8609	0.27494	2.8609	0.35356	2.8609	0.06929	2.8609	0.04385	2.8609	0.03913	2.8609	0.08661
2.85521	0.00174	2.85521	0.000648174	2.85521	0.0047	2.86267	0.13543	2.86267	0.25393	2.86267	0.3577	2.86267	0.07267	2.86267	0.03821	2.86267	0.04131	2.86267	0.0834
2.85698	0.00168	2.85698	0.000339518	2.85698	0.00447	2.86445	0.12611	2.86445	0.23809	2.86445	0.35825	2.86445	0.07713	2.86445	0.03705	2.86445	0.04418	2.86445	0.07402
2.85875	0.00172	2.85875	0.000453607	2.85875	0.00419	2.86622	0.11653	2.86622	0.22347	2.86622	0.35437	2.86622	0.07712	2.86622	0.03483	2.86622	0.04742	2.86622	0.0787
2.86052	0.00162	2.86052	0.000738434	2.86052	0.00428	2.86799	0.10657	2.86799	0.21194	2.86799	0.3518	2.86799	0.0886	2.86799	0.03476	2.86799	0.05407	2.86799	0.07859
2.86229	0.00142	2.86229	0.00094654	2.86229	0.00447	2.86977	0.09556	2.86977	0.20192	2.86977	0.32511	2.86977	0.09438	2.86977	0.0401	2.86977	0.05364	2.86977	0.0775
2.86405	0.0013	2.86405	0.00119	2.86405	0.00449	2.87154	0.08538	2.87154	0.18959	2.87154	0.30462	2.87154	0.10416	2.87154	0.04681	2.87154	0.05928	2.87154	0.08008
2.86582	0.00141	2.86582	0.00132	2.86582	0.00409	2.87331	0.07788	2.87331	0.17727	2.87331	0.29198	2.87331	0.11612	2.87331	0.05659	2.87331	0.06551	2.87331	0.07934
2.86759	0.00165	2.86759	0.00147	2.86759	0.0037	2.87508	0.0715	2.87508	0.16356	2.87508	0.27729	2.87508	0.12594	2.87508	0.0663	2.87508	0.07218	2.87508	0.08684
2.86936	0.00178	2.86936	0.00155	2.86936	0.00373	2.87686	0.06372	2.87686	0.15396	2.87686	0.26268	2.87686	0.13142	2.87686	0.07916	2.87686	0.07654	2.87686	0.08971
2.87113	0.00188	2.87113	0.00134	2.87113	0.00366	2.87863	0.05819	2.87863	0.14065	2.87863	0.24239	2.87863	0.13617	2.87863	0.09172	2.87863	0.08524	2.87863	0.09413
2.8729	0.00208	2.8729	0.00117	2.8729	0.0034	2.8804	0.05352	2.8804	0.12851	2.8804	0.22585	2.8804	0.14816	2.8804	0.09658	2.8804	0.10032	2.8804	0.09673
2.87466	0.0022	2.87466	0.000928237	2.87466	0.00321	2.88218	0.04841	2.88218	0.1203	2.88218	0.21015	2.88218	0.15409	2.88218	0.11022	2.88218	0.11337	2.88218	0.09796
2.87643	0.00211	2.87643	0.000827663	2.87643	0.0032	2.88395	0.0428	2.88395	0.11011	2.88395	0.19861	2.88395	0.15538	2.88395	0.12035	2.88395	0.12281	2.88395	0.10675
2.8782	0.00197	2.8782	0.000582242	2.8782	0.00293	2.88572	0.03544	2.88572	0.10238	2.88572	0.18778	2.88572	0.16734	2.88572	0.12967	2.88572	0.14025	2.88572	0.10759
2.87997	0.00168	2.87997	0.000203424	2.87997	0.00282	2.88749	0.03104	2.88749	0.09853	2.88749	0.1784	2.88749	0.17404	2.88749	0.14008	2.88749	0.15448	2.88749	0.10585
2.88174	0.0013	2.88174	-0.000202843	2.88174	0.00291	2.88927	0.0264	2.88927	0.09045	2.88927	0.17361	2.88927	0.17756	2.88927	0.15128	2.88927	0.17085	2.88927	0.11625
2.8835	0.00121	2.8835	-0.000441098	2.8835	0.00251	2.89104	0.01926	2.89104	0.08359	2.89104	0.16946	2.89104	0.17689	2.89104	0.15773	2.89104	0.19307	2.89104	0.12896
2.88527	0.00132	2.88527	-0.000448503	2.88527	0.00175	2.89281	0.01606	2.89281	0.07609	2.89281	0.16392	2.89281	0.17308	2.89281	0.16009	2.89281	0.20507	2.89281	0.1338
2.88704	0.00149	2.88704	-0.000458182	2.88704	0.00107	2.89458	0.01543	2.89458	0.07045	2.89458	0.1619	2.89458	0.16965	2.89458	0.16172	2.89458	0.21624	2.89458	0.142
2.88881	0.00141	2.88881	-0.000345495	2.88881	0.000995848	2.89636	0.01496	2.89636	0.06236	2.89636	0.16159	2.89636	0.16164	2.89636	0.16093	2.89636	0.22693	2.89636	0.1596
2.89058	0.00121	2.89058	-6.30467e-05	2.89058	0.000871843	2.89813	0.01381	2.89813	0.05416	2.89813	0.16305	2.89813	0.14887	2.89813	0.16025	2.89813	0.24006	2.89813	0.17098
2.89234	0.00106	2.89234	2.35106e-05	2.89234	0.000658372	2.8999	0.01189	2.8999	0.04669	2.8999	0.16728	2.8999	0.13912	2.8999	0.15468	2.8999	0.24488	2.8999	0.18024
2.89411	0.000758472	2.89411	-0.000301646	2.89411	0.000732392	2.90168	0.01234	2.90168	0.04143	2.90168	0.17071	2.90168	0.12546	2.90168	0.15267	2.90168	0.25324	2.90168	0.19178
2.89588	0.000406457	2.89588	-0.000885659	2.89588	0.000509666	2.90345	0.01175	2.90345	0.03889	2.90345	0.16715	2.90345	0.11662	2.90345	0.14369	2.90345	0.2617	2.90345	0.19978
2.89765	0.000359375	2.89765	-0.0016	2.89765	3.80564e-05	2.90522	0.00995	2.90522	0.03382	2.90522	0.1606	2.90522	0.11186	2.90522	0.13694	2.90522	0.26285	2.90522	0.20991
2.89942	0.000311007	2.89942	-0.00209	2.89942	-0.000335963	2.90699	0.00896	2.90699	0.03241	2.90699	0.15114	2.90699	0.10813	2.90699	0.13336	2.90699	0.25793	2.90699	0.21094
2.90118	0.000393452	2.90118	-0.00226	2.90118	-0.000658201	2.90877	0.00597	2.90877	0.02774	2.90877	0.13779	2.90877	0.10631	2.90877	0.12505	2.90877	0.25571	2.90877	0.21761
2.90295	0.000574716	2.90295	-0.00207	2.90295	-0.000936428	2.91054	0.000834405	2.91054	0.0289	2.91054	0.12693	2.91054	0.1046	2.91054	0.11778	2.91054	0.25755	2.91054	0.22459
2.90472	0.000791088	2.90472	-0.00186	2.90472	-0.000867373	2.91231	-0.00193	2.91231	0.02755	2.91231	0.11866	2.91231	0.10657	2.91231	0.10815	2.91231	0.24505	2.91231	0.22352
2.90649	0.000883483	2.90649	-0.00164	2.90649	-0.000230364	2.91408	-0.00346	2.91408	0.02488	2.91408	0.11353	2.91408	0.10521	2.91408	0.10206	2.91408	0.23645	2.91408	0.2202
2.90826	0.00093997	2.90826	-0.00151	2.90826	-4.56562e-05	2.91585	-0.00454	2.91585	0.02615	2.91585	0.11198	2.91585	0.10343	2.91585	0.09698	2.91585	0.23004	2.91585	0.21382
2.91002	0.000956445	2.91002	-0.00139	2.91002	-0.000448354	2.91763	-0.00232	2.91763	0.02582	2.91763	0.10519	2.91763	0.10082	2.91763	0.09271	2.91763	0.22128	2.91763	0.21586
2.91179	0.000942053	2.91179	-0.00121	2.91179	-0.000679412	2.9194	0.000656804	2.9194	0.02982	2.9194	0.09698	2.9194	0.10066	2.9194	0.0904	2.9194	0.20309	2.9194	0.20834
2.91356	0.000889889	2.91356	-0.000997632	2.91356	-0.000720959	2.92117	0.00102	2.92117	0.0251	2.92117	0.08922	2.92117	0.09275	2.92117	0.08672	2.92117	0.19003	2.92117	0.19335
2.91533	0.000738551	2.91533	-0.000918269	2.91533	-0.000883743	2.92294	0.000903968	2.92294	0.02168	2.92294	0.08329	2.92294	0.08099	2.92294	0.0827	2.92294	0.17923	2.92294	0.18865
2.91709	0.000825396	2.91709	-0.00107	2.91709	-0.00141	2.92472	0.000886324	2.92472	0.01965	2.92472	0.07226	2.92472	0.07714	2.92472	0.08066	2.92472	0.1623	2.92472	0.18475
2.91886	0.00099603	2.91886	-0.00096783	2.91886	-0.00181	2.92649	-0.00101	2.92649	0.00938	2.92649	0.06403	2.92649	0.07513	2.92649	0.07449	2.92649	0.14773	2.92649	0.17149
2.92063	0.00106	2.92063	-0.000779001	2.92063	-0.00181	2.92826	-0.00164	2.92826	0.00577	2.92826	0.05334	2.92826	0.06705	2.92826	0.06359	2.92826	0.13675	2.92826	0.15687
2.9224	0.000815603	2.9224	-0.000573197	2.9224	-0.00152	2.93003	-0.00457	2.93003	0.000352279	2.93003	0.04431	2.93003	0.05693	2.93003	0.06068	2.93003	0.12834	2.93003	0.14607
2.92416	0.000536667	2.92416	-0.000654385	2.92416	-0.00114	2.93181	-0.00299	2.93181	-0.00198	2.93181	0.04139	2.93181	0.05575	2.93181	0.06162	2.93181	0.12015	2.93181	0.13634
2.92593	0.000610232	2.92593	-0.000651848	2.92593	-0.00131	2.93358	-0.00135	2.93358	-0.00379	2.93358	0.0341	2.93358	0.05423	2.93358	0.0549	2.93358	0.11568	2.93358	0.12136
2.9277	0.00058414	2.9277	-0.000489469	2.9277	-0.00147	2.93535	-0.000587241	2.93535	-0.00616	2.93535	0.03119	2.93535	0.05194	2.93535	0.05213	2.93535	0.11374	2.93535	0.10808
2.92947	0.000278936	2.92947	-0.000624793	2.92947	-0.00127	2.93712	0.000705026	2.93712	-0.00371	2.93712	0.0313	2.93712	0.04324	2.93712	0.05226	2.93712	0.11083	2.93712	0.1017
2.93123	-3.53611e-05	2.93123	-0.000875795	2.93123	-0.00107	2.93889	-0.000599007	2.93889	-0.00567	2.93889	0.03279	2.93889	0.03956	2.93889	0.0575	2.93889	0.1063	2.93889	0.0905
2.933	4.97892e-05	2.933	-0.00107	2.933	-0.000923568	2.94067	0.00199	2.94067	-0.00669	2.94067	0.02659	2.94067	0.04149	2.94067	0.05657	2.94067	0.08756	2.94067	0.08769
2.93477	0.000238394	2.93477	-0.00126	2.93477	-0.000690531	2.94244	0.00132	2.94244	-0.00635	2.94244	0.02011	2.94244	0.03588	2.94244	0.04915	2.94244	0.07774	2.94244	0.08175
2.93654	0.000263515	2.93654	-0.0017	2.93654	-0.000757969	2.94421	0.000775933	2.94421	-0.00875	2.94421	0.02059	2.94421	0.0347	2.94421	0.04255	2.94421	0.0787	2.94421	0.08504
2.9383	0.000242135	2.9383	-0.00211	2.9383	-0.00128	2.94598	0.000110727	2.94598	-0.01148	2.94598	0.01727	2.94598	0.02769	2.94598	0.04186	2.94598	0.06824	2.94598	0.0867
2.94007	0.000213491	2.94007	-0.00242	2.94007	-0.00167	2.94775	0.00148	2.94775	-0.01143	2.94775	0.01423	2.94775	0.03241	2.94775	0.04044	2.94775	0.06613	2.94775	0.08763
2.94184	0.000209012	2.94184	-0.00264	2.94184	-0.00188	2.94953	0.005	2.94953	-0.00941	2.94953	0.0161	2.94953	0.03715	2.94953	0.03206	2.94953	0.07143	2.94953	0.08468
2.94361	9.96773e-05	2.94361	-0.00285	2.94361	-0.00186	2.9513	0.00387	2.9513	-0.00717	2.9513	0.01649	2.9513	0.03282	2.9513	0.03261	2.9513	0.07612	2.9513	0.08003
2.94537	0.00018553	2.94537	-0.00292	2.94537	-0.00185	2.95307	0.0062	2.95307	-0.00365	2.95307	0.00694	2.95307	0.0343	2.95307	0.04041	2.95307	0.07263	2.95307	0.08118
2.94714	0.000432297	2.94714	-0.00274	2.94714	-0.00119	2.95484	0.00358	2.95484	-0.00302	2.95484	0.00199	2.95484	0.03413	2.95484	0.04333	2.95484	0.06559	2.95484	0.07294
2.94891	0.000527729	2.94891	-0.00254	2.94891	-0.000997208	2.95661	0.00307	2.95661	-0.00262	2.95661	0.00141	2.95661	0.03694	2.95661	0.0416	2.95661	0.05819	2.95661	0.06631
2.95067	0.000545507	2.95067	-0.00229	2.95067	-0.0013	2.95839	0.00121	2.95839	-0.00688	2.95839	0.0014	2.95839	0.03231	2.95839	0.0423	2.95839	0.05239	2.95839	0.06331
2.95244	0.000502864	2.95244	-0.00209	2.95244	-0.00152	2.96016	-0.00365	2.96016	-0.00274	2.96016	-0.00024282	2.96016	0.03558	2.96016	0.04557	2.96016	0.05321	2.96016	0.06269
2.95421	0.000455546	2.95421	-0.0019	2.95421	-0.00185	2.96193	-0.00392	2.96193	-0.00666	2.96193	-0.00302	2.96193	0.0382	2.96193	0.03826	2.96193	0.04538	2.96193	0.05526
2.95598	0.000353398	2.95598	-0.00161	2.95598	-0.00201	2.9637	-0.00919	2.9637	-0.01274	2.9637	0.00118	2.9637	0.03908	2.9637	0.03685	2.9637	0.04193	2.9637	0.04737
2.95774	0.000351391	2.95774	-0.00158	2.95774	-0.00206	2.96547	-0.01229	2.96547	-0.01357	2.96547	0.000474052	2.96547	0.0479	2.96547	0.03799	2.96547	0.04667	2.96547	0.04443
2.95951	0.000228367	2.95951	-0.00165	2.95951	-0.00213	2.96724	-0.01135	2.96724	-0.01056	2.96724	-0.00184	2.96724	0.05747	2.96724	0.03614	2.96724	0.05597	2.96724	0.04143
2.96128	0.000128127	2.96128	-0.0017	2.96128	-0.00225	2.96902	-0.01111	2.96902	-0.01267	2.96902	-0.00449	2.96902	0.0689	2.96902	0.03517	2.96902	0.05153	2.96902	0.02872
2.96304	0.000175716	2.96304	-0.00178	2.96304	-0.00232	2.97079	-0.00786	2.97079	-0.01459	2.97079	-0.00777	2.97079	0.08	2.97079	0.03145	2.97079	0.05025	2.97079	0.01916
2.96481	2.95181e-05	2.96481	-0.00179	2.96481	-0.00231	2.97256	-0.00438	2.97256	-0.01051	2.97256	-0.00514	2.97256	0.0934	2.97256	0.02954	2.97256	0.05701	2.97256	0.02183
2.96658	-3.20895e-05	2.96658	-0.00179	2.96658	-0.00202	2.97433	0.000124002	2.97433	-0.00937	2.97433	-2.14205e-05	2.97433	0.09504	2.97433	0.02299	2.97433	0.05462	2.97433	0.02255
2.96835	6.83854e-05	2.96835	-0.00178	2.96835	-0.0017	2.9761	0.00364	2.9761	-0.00568	2.9761	0.00143	2.9761	0.09474	2.9761	0.01874	2.9761	0.04763	2.9761	0.01944
2.97011	0.000154373	2.97011	-0.00184	2.97011	-0.00157	2.97787	0.00141	2.97787	-0.00418	2.97787	0.00405	2.97787	0.10002	2.97787	0.01968	2.97787	0.03883	2.97787	0.01748
2.97188	0.000346835	2.97188	-0.00196	2.97188	-0.00144	2.97965	0.0063	2.97965	-0.0043	2.97965	0.01123	2.97965	0.10572	2.97965	0.02204	2.97965	0.03445	2.97965	0.02304
2.97365	0.000526152	2.97365	-0.00196	2.97365	-0.00154	2.98142	0.00954	2.98142	-0.0029	2.98142	0.01797	2.98142	0.10718	2.98142	0.02407	2.98142	0.032	2.98142	0.02279
2.97541	0.000681072	2.97541	-0.00189	2.97541	-0.000997531	2.98319	0.00769	2.98319	-0.00361	2.98319	0.01532	2.98319	0.10831	2.98319	0.02891	2.98319	0.0285	2.98319	0.01984
2.97718	0.000703387	2.97718	-0.00182	2.97718	-0.000405484	2.98496	0.00837	2.98496	0.000475514	2.98496	0.01184	2.98496	0.11905	2.98496	0.03273	2.98496	0.02737	2.98496	0.02573
2.97895	0.00046721	2.97895	-0.00165	2.97895	-0.000103602	2.98673	0.01259	2.98673	-0.00338	2.98673	0.0103	2.98673	0.12703	2.98673	0.03537	2.98673	0.02742	2.98673	0.03068
2.98071	0.000551854	2.98071	-0.00168	2.98071	-3.68389e-05	2.9885	0.01486	2.9885	-0.0055	2.9885	0.01111	2.9885	0.12782	2.9885	0.03763	2.9885	0.03311	2.9885	0.02654
2.98248	0.000617983	2.98248	-0.00183	2.98248	-0.000347168	2.99028	0.01519	2.99028	-0.00653	2.99028	0.01112	2.99028	0.13318	2.99028	0.03933	2.99028	0.03333	2.99028	0.02677
2.98425	0.000621039	2.98425	-0.002	2.98425	-0.00072386	2.99205	0.01555	2.99205	-0.01154	2.99205	0.00866	2.99205	0.13834	2.99205	0.03904	2.99205	0.03065	2.99205	0.02856
2.98601	0.000695073	2.98601	-0.00202	2.98601	-0.00135	2.99382	0.01299	2.99382	-0.00743	2.99382	0.00739	2.99382	0.14764	2.99382	0.04271	2.99382	0.0358	2.99382	0.02999
2.98778	0.000735028	2.98778	-0.00189	2.98778	-0.00218	2.99559	0.01186	2.99559	-0.00765	2.99559	0.00394	2.99559	0.15218	2.99559	0.04683	2.99559	0.04379	2.99559	0.03226
2.98955	0.000741766	2.98955	-0.00189	2.98955	-0.00269	2.99736	0.00759	2.99736	-0.00777	2.99736	-0.000559286	2.99736	0.15973	2.99736	0.04999	2.99736	0.04173	2.99736	0.03179
2.99131	0.000741707	2.99131	-0.00205	2.99131	-0.00269	2.99913	0.00474	2.99913	-0.00443	2.99913	-0.00907	2.99913	0.16742	2.99913	0.05226	2.99913	0.03567	2.99913	0.03303
2.99308	0.000847477	2.99308	-0.00218	2.99308	-0.0026	3.0009	0.0016	3.0009	-0.00179	3.0009	-0.01213	3.0009	0.16184	3.0009	0.05115	3.0009	0.04043	3.0009	0.02939
2.99485	0.000940399	2.99485	-0.0025	2.99485	-0.00237	3.00267	5.37642e-06	3.00267	0.00186	3.00267	-0.01365	3.00267	0.15805	3.00267	0.05037	3.00267	0.042	3.00267	0.02963
2.99661	0.000981174	2.99661	-0.00269	2.99661	-0.00191	3.00445	0.00284	3.00445	0.00318	3.00445	-0.01379	3.00445	0.14932	3.00445	0.05006	3.00445	0.03625	3.00445	0.02427
2.99838	0.00101	2.99838	-0.00268	2.99838	-0.00168	3.00622	0.00478	3.00622	0.01065	3.00622	-0.01879	3.00622	0.1428	3.00622	0.05054	3.00622	0.03039	3.00622	0.01993
3.00015	0.00103	3.00015	-0.00258	3.00015	-0.00168	3.00799	0.00748	3.00799	0.01506	3.00799	-0.01626	3.00799	0.13747	3.00799	0.04907	3.00799	0.03228	3.00799	0.02256
3.00191	0.00105	3.00191	-0.00248	3.00191	-0.00152	3.00976	0.00856	3.00976	0.01703	3.00976	-0.01258	3.00976	0.13531	3.00976	0.04931	3.00976	0.03466	3.00976	0.02478
3.00368	0.00104	3.00368	-0.00247	3.00368	-0.00156	3.01153	0.00946	3.01153	0.02071	3.01153	-0.0175	3.01153	0.13368	3.01153	0.05504	3.01153	0.03076	3.01153	0.02881
3.00545	0.000950096	3.00545	-0.00234	3.00545	-0.00162	3.0133	0.01464	3.0133	0.02069	3.0133	-0.01455	3.0133	0.13123	3.0133	0.05848	3.0133	0.03983	3.0133	0.02726
3.00721	0.000928619	3.00721	-0.00243	3.00721	-0.00191	3.01507	0.01389	3.01507	0.02052	3.01507	-0.00702	3.01507	0.1231	3.01507	0.06153	3.01507	0.0498	3.01507	0.03411
3.00898	0.000900305	3.00898	-0.00257	3.00898	-0.00186	3.01684	0.01085	3.01684	0.01924	3.01684	-0.00396	3.01684	0.11834	3.01684	0.05998	3.01684	0.05967	3.01684	0.03687
3.01075	0.00104	3.01075	-0.00276	3.01075	-0.00203	3.01862	0.01221	3.01862	0.01841	3.01862	-0.00195	3.01862	0.10275	3.01862	0.06179	3.01862	0.07454	3.01862	0.03961
3.01251	0.00107	3.01251	-0.00268	3.01251	-0.00249	3.02039	0.01205	3.02039	0.01745	3.02039	0.00173	3.02039	0.08938	3.02039	0.06655	3.02039	0.07889	3.02039	0.04942
3.01428	0.00114	3.01428	-0.00233	3.01428	-0.00275	3.02216	0.01336	3.02216	0.01625	3.02216	0.0022	3.02216	0.0856	3.02216	0.06186	3.02216	0.08669	3.02216	0.05193
3.01605	0.00109	3.01605	-0.00212	3.01605	-0.00277	3.02393	0.01451	3.02393	0.01933	3.02393	0.00115	3.02393	0.07674	3.02393	0.06017	3.02393	0.09726	3.02393	0.05597
3.01781	0.00096279	3.01781	-0.00206	3.01781	-0.0028	3.0257	0.01628	3.0257	0.02053	3.0257	-0.000345321	3.0257	0.07132	3.0257	0.06921	3.0257	0.10667	3.0257	0.06189
3.01958	0.000872791	3.01958	-0.00216	3.01958	-0.00273	3.02747	0.01607	3.02747	0.02041	3.02747	-0.000975636	3.02747	0.06883	3.02747	0.08028	3.02747	0.11135	3.02747	0.06847
3.02135	0.000485378	3.02135	-0.00222	3.02135	-0.00262	3.02924	0.01462	3.02924	0.0248	3.02924	0.00242	3.02924	0.06939	3.02924	0.09121	3.02924	0.11506	3.02924	0.07432
3.02311	0.000356687	3.02311	-0.0025	3.02311	-0.00231	3.03101	0.01815	3.03101	0.02527	3.03101	0.00254	3.03101	0.06661	3.03101	0.10348	3.03101	0.12286	3.03101	0.0793
3.02488	0.000418842	3.02488	-0.00285	3.02488	-0.00215	3.03278	0.01676	3.03278	0.02694	3.03278	-0.000722769	3.03278	0.06306	3.03278	0.1152	3.03278	0.12471	3.03278	0.08081
3.02664	0.000555223	3.02664	-0.00309	3.02664	-0.00225	3.03455	0.01379	3.03455	0.02951	3.03455	-0.00284	3.03455	0.06357	3.03455	0.11987	3.03455	0.12829	3.03455	0.07491
3.02841	0.000691897	3.02841	-0.00324	3.02841	-0.00235	3.03632	0.01673	3.03632	0.03036	3.03632	0.000450447	3.03632	0.06211	3.03632	0.12295	3.03632	0.1347	3.03632	0.06476
3.03018	0.000809489	3.03018	-0.00325	3.03018	-0.00166	3.0381	0.01874	3.0381	0.03186	3.0381	0.00057699	3.0381	0.06022	3.0381	0.12339	3.0381	0.14705	3.0381	0.06883
3.03194	0.000915435	3.03194	-0.0031	3.03194	-0.00040226	3.03987	0.01995	3.03987	0.02974	3.03987	0.00322	3.03987	0.06697	3.03987	0.12514	3.03987	0.16333	3.03987	0.06782
3.03371	0.000959404	3.03371	-0.00293	3.03371	0.000586378	3.04164	0.02099	3.04164	0.0281	3.04164	0.01052	3.04164	0.06322	3.04164	0.13605	3.04164	0.18303	3.04164	0.06835
3.03548	0.000923108	3.03548	-0.00281	3.03548	0.001	3.04341	0.02551	3.04341	0.02744	3.04341	0.01332	3.04341	0.06362	3.04341	0.15038	3.04341	0.20852	3.04341	0.07753
3.03724	0.000895282	3.03724	-0.00261	3.03724	0.00134	3.04518	0.02621	3.04518	0.02225	3.04518	0.01266	3.04518	0.06368	3.04518	0.16201	3.04518	0.23362	3.04518	0.08994
3.03901	0.000931071	3.03901	-0.00229	3.03901	0.00182	3.04695	0.01867	3.04695	0.0182	3.04695	0.01615	3.04695	0.06177	3.04695	0.17569	3.04695	0.26108	3.04695	0.0963
3.04077	0.00103	3.04077	-0.00206	3.04077	0.00122	3.04872	0.01239	3.04872	0.01283	3.04872	0.01738	3.04872	0.05629	3.04872	0.19146	3.04872	0.28421	3.04872	0.10464
3.04254	0.00116	3.04254	-0.00174	3.04254	0.000273148	3.05049	0.00404	3.05049	0.00543	3.05049	0.01166	3.05049	0.0487	3.05049	0.19384	3.05049	0.30778	3.05049	0.11269
3.04431	0.00122	3.04431	-0.00151	3.04431	-0.000375988	3.05226	0.000183145	3.05226	0.000953253	3.05226	0.00752	3.05226	0.04987	3.05226	0.19473	3.05226	0.33192	3.05226	0.1249
3.04607	0.00127	3.04607	-0.00138	3.04607	-0.0005618	3.05403	-0.0047	3.05403	-0.00566	3.05403	0.00281	3.05403	0.04548	3.05403	0.19317	3.05403	0.36825	3.05403	0.13565
3.04784	0.00142	3.04784	-0.00126	3.04784	-0.000956022	3.0558	-0.00575	3.0558	-0.00905	3.0558	-0.00336	3.0558	0.04438	3.0558	0.1887	3.0558	0.39429	3.0558	0.14825
3.0496	0.00154	3.0496	-0.00114	3.0496	-0.00137	3.05757	0.000437871	3.05757	-0.01152	3.05757	-0.01277	3.05757	0.04024	3.05757	0.18141	3.05757	0.4194	3.05757	0.1634
3.05137	0.00144	3.05137	-0.00108	3.05137	-0.0016	3.05934	0.006	3.05934	-0.01089	3.05934	-0.01736	3.05934	0.03976	3.05934	0.1765	3.05934	0.45006	3.05934	0.17197
3.05314	0.00127	3.05314	-0.00133	3.05314	-0.00214	3.06111	0.00819	3.06111	-0.01038	3.06111	-0.01665	3.06111	0.03923	3.06111	0.17192	3.06111	0.46836	3.06111	0.18562
3.0549	0.00098392	3.0549	-0.00151	3.0549	-0.00276	3.06288	0.00968	3.06288	-0.00475	3.06288	-0.01431	3.06288	0.03444	3.06288	0.15847	3.06288	0.47855	3.06288	0.18774
3.05667	0.00079983	3.05667	-0.00158	3.05667	-0.00307	3.06466	0.01112	3.06466	-0.003	3.06466	-0.01442	3.06466	0.03043	3.06466	0.14788	3.06466	0.48836	3.06466	0.19408
3.05843	0.000829408	3.05843	-0.00155	3.05843	-0.00316	3.06643	0.01314	3.06643	-0.002	3.06643	-0.01216	3.06643	0.02865	3.06643	0.14442	3.06643	0.50176	3.06643	0.20089
3.0602	0.000920479	3.0602	-0.00158	3.0602	-0.00308	3.0682	0.01086	3.0682	-0.000140284	3.0682	-0.01035	3.0682	0.02866	3.0682	0.14227	3.0682	0.4956	3.0682	0.1965
3.06196	0.00112	3.06196	-0.0017	3.06196	-0.00302	3.06997	0.01051	3.06997	-0.00612	3.06997	-0.00743	3.06997	0.02417	3.06997	0.14007	3.06997	0.4814	3.06997	0.19098
3.06373	0.00124	3.06373	-0.00164	3.06373	-0.00302	3.07174	0.01077	3.07174	-0.01399	3.07174	-0.00771	3.07174	0.02161	3.07174	0.13713	3.07174	0.46774	3.07174	0.19191
3.0655	0.00131	3.0655	-0.00162	3.0655	-0.00317	3.07351	0.00392	3.07351	-0.02009	3.07351	-0.00343	3.07351	0.02027	3.07351	0.13455	3.07351	0.44962	3.07351	0.19732
3.06726	0.00138	3.06726	-0.00174	3.06726	-0.00308	3.07528	0.000313366	3.07528	-0.02128	3.07528	0.00568	3.07528	0.01768	3.07528	0.13055	3.07528	0.42666	3.07528	0.20032
3.06903	0.0014	3.06903	-0.00172	3.06903	-0.00258	3.07705	-0.00182	3.07705	-0.02061	3.07705	0.01603	3.07705	0.01354	3.07705	0.1217	3.07705	0.39808	3.07705	0.19604
3.07079	0.00151	3.07079	-0.00169	3.07079	-0.00205	3.07882	-0.00225	3.07882	-0.02193	3.07882	0.02465	3.07882	0.01212	3.07882	0.11236	3.07882	0.37445	3.07882	0.19307
3.07256	0.00152	3.07256	-0.0015	3.07256	-0.00179	3.08059	-0.00571	3.08059	-0.02497	3.08059	0.02582	3.08059	0.01428	3.08059	0.11004	3.08059	0.34572	3.08059	0.18602
3.07432	0.00149	3.07432	-0.00118	3.07432	-0.00195	3.08236	-0.00659	3.08236	-0.02253	3.08236	0.03046	3.08236	0.01182	3.08236	0.10448	3.08236	0.32253	3.08236	0.17046
3.07609	0.00127	3.07609	-0.000765277	3.07609	-0.00188	3.08413	-0.00301	3.08413	-0.02476	3.08413	0.03205	3.08413	0.00846	3.08413	0.10091	3.08413	0.29563	3.08413	0.16204
3.07786	0.00125	3.07786	-0.000423484	3.07786	-0.00147	3.0859	-0.000493821	3.0859	-0.02499	3.0859	0.02459	3.0859	0.01157	3.0859	0.09247	3.0859	0.26164	3.0859	0.15382
3.07962	0.00137	3.07962	-0.000228126	3.07962	-0.00133	3.08767	-0.000616647	3.08767	-0.02569	3.08767	0.01738	3.08767	0.01115	3.08767	0.08008	3.08767	0.23948	3.08767	0.14294
3.08139	0.00157	3.08139	-0.000198584	3.08139	-0.00127	3.08944	-0.00286	3.08944	-0.02285	3.08944	0.01196	3.08944	0.01432	3.08944	0.07666	3.08944	0.2285	3.08944	0.13612
3.08315	0.00182	3.08315	-5.74941e-05	3.08315	-0.00108	3.09121	-0.000862969	3.09121	-0.01659	3.09121	0.00126	3.09121	0.01733	3.09121	0.07037	3.09121	0.21105	3.09121	0.1336
3.08492	0.00194	3.08492	-9.89367e-05	3.08492	-0.000993669	3.09298	-0.00278	3.09298	-0.01712	3.09298	-0.00687	3.09298	0.01872	3.09298	0.06201	3.09298	0.19758	3.09298	0.12867
3.08668	0.00204	3.08668	-0.000220853	3.08668	-0.000991434	3.09475	-0.0051	3.09475	-0.01475	3.09475	-0.00753	3.09475	0.02462	3.09475	0.05834	3.09475	0.18333	3.09475	0.12458
3.08845	0.00213	3.08845	-0.000191684	3.08845	-0.00088574	3.09652	-0.00594	3.09652	-0.01194	3.09652	-0.00521	3.09652	0.02308	3.09652	0.06014	3.09652	0.16809	3.09652	0.1158
3.09021	0.00221	3.09021	4.76019e-05	3.09021	-0.000705626	3.09829	-0.00543	3.09829	-0.00875	3.09829	-0.00368	3.09829	0.0215	3.09829	0.05503	3.09829	0.15939	3.09829	0.11932
3.09198	0.00234	3.09198	0.000213236	3.09198	-0.000673553	3.10006	-0.00285	3.10006	-0.00947	3.10006	-0.00406	3.10006	0.01752	3.10006	0.04781	3.10006	0.14446	3.10006	0.12181
3.09374	0.0024	3.09374	5.12264e-05	3.09374	-0.000794133	3.10183	-0.00184	3.10183	-0.00492	3.10183	-0.00493	3.10183	0.00626	3.10183	0.04733	3.10183	0.13198	3.10183	0.11842
3.09551	0.00229	3.09551	-3.1258e-05	3.09551	-0.000350155	3.1036	0.000124505	3.1036	-0.00229	3.1036	-0.00765	3.1036	0.00379	3.1036	0.04754	3.1036	0.12541	3.1036	0.11676
3.09728	0.00218	3.09728	6.39978e-06	3.09728	-6.09606e-05	3.10537	-0.00214	3.10537	-0.00204	3.10537	-0.01284	3.10537	0.000892269	3.10537	0.04054	3.10537	0.11654	3.10537	0.11505
3.09904	0.00205	3.09904	-2.06249e-06	3.09904	-0.000184698	3.10714	0.000950343	3.10714	-0.00622	3.10714	-0.02101	3.10714	0.000727547	3.10714	0.03636	3.10714	0.11559	3.10714	0.11649
3.10081	0.00225	3.10081	-0.000371623	3.10081	-0.000362644	3.10891	0.00613	3.10891	-0.01147	3.10891	-0.02908	3.10891	-0.000826788	3.10891	0.03653	3.10891	0.10486	3.10891	0.10866
3.10257	0.00239	3.10257	-0.000563781	3.10257	-0.000510826	3.11068	0.00463	3.11068	-0.0145	3.11068	-0.0348	3.11068	-0.00183	3.11068	0.03611	3.11068	0.10039	3.11068	0.09732
3.10434	0.00242	3.10434	-0.000383233	3.10434	-0.000978926	3.11245	0.00387	3.11245	-0.02055	3.11245	-0.03891	3.11245	0.00317	3.11245	0.03457	3.11245	0.09676	3.11245	0.10289
3.1061	0.0025	3.1061	-0.000244258	3.1061	-0.00179	3.11422	0.00429	3.11422	-0.02095	3.11422	-0.04321	3.11422	0.0024	3.11422	0.03392	3.11422	0.08445	3.11422	0.10317
3.10787	0.00271	3.10787	-0.000225667	3.10787	-0.00198	3.11599	0.00451	3.11599	-0.01735	3.11599	-0.04348	3.11599	0.00711	3.11599	0.03672	3.11599	0.08207	3.11599	0.09629
3.10963	0.00293	3.10963	-0.000500628	3.10963	-0.00172	3.11776	0.00272	3.11776	-0.017	3.11776	-0.04243	3.11776	0.0076	3.11776	0.03779	3.11776	0.07326	3.11776	0.0884
3.1114	0.00283	3.1114	-0.000478545	3.1114	-0.00159	3.11953	0.0011	3.11953	-0.01702	3.11953	-0.04678	3.11953	0.0148	3.11953	0.03694	3.11953	0.06714	3.11953	0.09276
3.11316	0.00251	3.11316	-0.000251054	3.11316	-0.0017	3.1213	-0.000347474	3.1213	-0.01947	3.1213	-0.04426	3.1213	0.02259	3.1213	0.03097	3.1213	0.06261	3.1213	0.0922
3.11493	0.00237	3.11493	-0.000402248	3.11493	-0.00181	3.12307	-0.00166	3.12307	-0.01642	3.12307	-0.03611	3.12307	0.02619	3.12307	0.02712	3.12307	0.06113	3.12307	0.08662
3.11669	0.0023	3.11669	-0.000808517	3.11669	-0.0022	3.12484	-0.00179	3.12484	-0.01559	3.12484	-0.02958	3.12484	0.03134	3.12484	0.01777	3.12484	0.06009	3.12484	0.08457
3.11846	0.00233	3.11846	-0.000928846	3.11846	-0.00256	3.12661	-0.0034	3.12661	-0.0181	3.12661	-0.0252	3.12661	0.02965	3.12661	0.00975	3.12661	0.05366	3.12661	0.08449
3.12022	0.00242	3.12022	-0.000878412	3.12022	-0.00288	3.12838	-0.00745	3.12838	-0.01856	3.12838	-0.01483	3.12838	0.03093	3.12838	0.00205	3.12838	0.0519	3.12838	0.08559
3.12199	0.00256	3.12199	-0.000688078	3.12199	-0.00297	3.13015	-0.00831	3.13015	-0.0167	3.13015	-0.00915	3.13015	0.02951	3.13015	-0.00131	3.13015	0.05089	3.13015	0.07765
3.12375	0.00255	3.12375	-0.0003959	3.12375	-0.0031	3.13192	-0.00615	3.13192	-0.00971	3.13192	-0.00805	3.13192	0.02981	3.13192	0.00251	3.13192	0.04014	3.13192	0.07468
3.12552	0.00249	3.12552	3.82427e-05	3.12552	-0.0031	3.13369	-0.00762	3.13369	-0.0098	3.13369	-0.01003	3.13369	0.02842	3.13369	0.000548717	3.13369	0.03509	3.13369	0.07455
3.12728	0.00236	3.12728	0.000333064	3.12728	-0.00252	3.13545	-0.00532	3.13545	-0.0099	3.13545	-0.00686	3.13545	0.02873	3.13545	0.00465	3.13545	0.03556	3.13545	0.07828
3.12905	0.00212	3.12905	0.000625058	3.12905	-0.00187	3.13722	-0.00175	3.13722	-0.00847	3.13722	-0.00906	3.13722	0.0317	3.13722	0.01014	3.13722	0.03143	3.13722	0.07053
3.13081	0.00183	3.13081	0.000968729	3.13081	-0.00153	3.13899	-0.00357	3.13899	-0.01065	3.13899	-0.0087	3.13899	0.03213	3.13899	0.00951	3.13899	0.02695	3.13899	0.06673
3.13258	0.00178	3.13258	0.00106	3.13258	-0.00112	3.14076	-0.00832	3.14076	-0.01618	3.14076	-0.00966	3.14076	0.03043	3.14076	0.01283	3.14076	0.02533	3.14076	0.06964
3.13434	0.00186	3.13434	0.00084845	3.13434	-0.000838514	3.14253	-0.01258	3.14253	-0.01946	3.14253	-0.01289	3.14253	0.0281	3.14253	0.02227	3.14253	0.02095	3.14253	0.06944
3.13611	0.00192	3.13611	0.000773024	3.13611	-0.000740116	3.1443	-0.01388	3.1443	-0.02099	3.1443	-0.01422	3.1443	0.02254	3.1443	0.02696	3.1443	0.01615	3.1443	0.0635
3.13787	0.0021	3.13787	0.00055323	3.13787	-0.000906124	3.14607	-0.01801	3.14607	-0.02045	3.14607	-0.01778	3.14607	0.01795	3.14607	0.02616	3.14607	0.01222	3.14607	0.05434
3.13964	0.00238	3.13964	0.000151459	3.13964	-0.00112	3.14784	-0.01775	3.14784	-0.01634	3.14784	-0.02018	3.14784	0.01723	3.14784	0.02791	3.14784	0.00731	3.14784	0.05301
3.1414	0.00266	3.1414	-2.96743e-05	3.1414	-0.00145	3.14961	-0.0126	3.14961	-0.01295	3.14961	-0.02105	3.14961	0.01358	3.14961	0.0267	3.14961	0.00603	3.14961	0.03927
3.14317	0.00286	3.14317	-6.59303e-05	3.14317	-0.00174	3.15138	-0.01211	3.15138	-0.01032	3.15138	-0.01838	3.15138	0.01384	3.15138	0.01354	3.15138	-0.00115	3.15138	0.02647
3.14493	0.00316	3.14493	8.06581e-06	3.14493	-0.00182	3.15315	-0.01092	3.15315	-0.01413	3.15315	-0.01774	3.15315	0.01329	3.15315	0.00449	3.15315	-0.00609	3.15315	0.02326
3.14669	0.00349	3.14669	-0.000102189	3.14669	-0.00179	3.15492	-0.00904	3.15492	-0.01495	3.15492	-0.01233	3.15492	0.01356	3.15492	0.000493412	3.15492	-0.00809	3.15492	0.01772
3.14846	0.00391	3.14846	-4.21814e-05	3.14846	-0.00197	3.15669	-0.00953	3.15669	-0.01721	3.15669	-0.00967	3.15669	0.01152	3.15669	0.000514488	3.15669	-0.00581	3.15669	0.00942
3.15022	0.00435	3.15022	2.04429e-05	3.15022	-0.00189	3.15846	-0.012	3.15846	-0.02555	3.15846	-0.0158	3.15846	0.00856	3.15846	-0.00052782	3.15846	-0.00125	3.15846	0.00734
3.15199	0.00488	3.15199	-4.69953e-05	3.15199	-0.00147	3.16023	-0.01638	3.16023	-0.0332	3.16023	-0.02054	3.16023	0.0067	3.16023	0.00313	3.16023	-0.00186	3.16023	0.01573
3.15375	0.00543	3.15375	-0.000126889	3.15375	-0.00142	3.16199	-0.01686	3.16199	-0.03917	3.16199	-0.02665	3.16199	0.00431	3.16199	0.0055	3.16199	0.00208	3.16199	0.01263
3.15552	0.00594	3.15552	-0.000223973	3.15552	-0.00171	3.16376	-0.01889	3.16376	-0.04106	3.16376	-0.03116	3.16376	0.00457	3.16376	0.00267	3.16376	0.00487	3.16376	0.00484
3.15728	0.00664	3.15728	-0.00026568	3.15728	-0.00212	3.16553	-0.01883	3.16553	-0.04297	3.16553	-0.03767	3.16553	0.0099	3.16553	-0.000381725	3.16553	-0.00111	3.16553	0.0058
3.15905	0.00736	3.15905	-0.000293554	3.15905	-0.00208	3.1673	-0.01735	3.1673	-0.04722	3.1673	-0.03614	3.1673	0.00906	3.1673	-0.00174	3.1673	-0.00576	3.1673	0.00331
3.16081	0.00794	3.16081	-0.000109487	3.16081	-0.00169	3.16907	-0.01638	3.16907	-0.04511	3.16907	-0.03313	3.16907	0.00817	3.16907	-0.00361	3.16907	-0.00577	3.16907	0.000261338
3.16258	0.00832	3.16258	0.000198532	3.16258	-0.00108	3.17084	-0.01448	3.17084	-0.03674	3.17084	-0.03295	3.17084	0.00911	3.17084	-0.00209	3.17084	-0.00627	3.17084	-0.00135
3.16434	0.00844	3.16434	0.000568859	3.16434	-0.00067907	3.17261	-0.01281	3.17261	-0.02997	3.17261	-0.02909	3.17261	0.01025	3.17261	-0.00702	3.17261	-0.00308	3.17261	-0.00362
3.1661	0.00831	3.1661	0.000857972	3.1661	-0.000639824	3.17438	-0.01434	3.17438	-0.02494	3.17438	-0.02273	3.17438	0.01213	3.17438	-0.00716	3.17438	7.85446e-05	3.17438	-0.00309
3.16787	0.00804	3.16787	0.000872067	3.16787	-0.000837554	3.17615	-0.01406	3.17615	-0.01962	3.17615	-0.01601	3.17615	0.00822	3.17615	-0.00808	3.17615	0.00261	3.17615	-0.00416
3.16963	0.00758	3.16963	0.00096989	3.16963	-0.00118	3.17792	-0.01496	3.17792	-0.01365	3.17792	-0.01472	3.17792	0.00805	3.17792	-0.01439	3.17792	0.00475	3.17792	-0.00363
3.1714	0.00726	3.1714	0.00122	3.1714	-0.00123	3.17969	-0.0171	3.17969	-0.01412	3.17969	-0.01382	3.17969	0.00786	3.17969	-0.01907	3.17969	0.00754	3.17969	-0.00404
3.17316	0.00698	3.17316	0.00141	3.17316	-0.00111	3.18145	-0.01849	3.18145	-0.01666	3.18145	-0.01433	3.18145	0.00569	3.18145	-0.02171	3.18145	0.00617	3.18145	-0.00751
3.17493	0.00685	3.17493	0.00172	3.17493	-0.000692652	3.18322	-0.0226	3.18322	-0.02007	3.18322	-0.01384	3.18322	0.00328	3.18322	-0.01485	3.18322	-0.000115438	3.18322	-0.00284
3.17669	0.00693	3.17669	0.00187	3.17669	-0.00046479	3.18499	-0.02144	3.18499	-0.0229	3.18499	-0.01656	3.18499	-0.00676	3.18499	-0.01066	3.18499	-0.00312	3.18499	-0.00657
3.17845	0.00709	3.17845	0.00174	3.17845	-0.000142818	3.18676	-0.02027	3.18676	-0.02684	3.18676	-0.02014	3.18676	-0.0167	3.18676	-0.01	3.18676	-0.0073	3.18676	-0.01117
3.18022	0.00762	3.18022	0.00154	3.18022	0.000125688	3.18853	-0.02109	3.18853	-0.02952	3.18853	-0.02306	3.18853	-0.02332	3.18853	-0.00522	3.18853	-0.00795	3.18853	-0.02156
3.18198	0.00859	3.18198	0.00139	3.18198	7.54088e-05	3.1903	-0.01965	3.1903	-0.0268	3.1903	-0.02616	3.1903	-0.02383	3.1903	-0.00147	3.1903	-0.00993	3.1903	-0.02322
3.18375	0.01	3.18375	0.00147	3.18375	-0.000536889	3.19207	-0.01735	3.19207	-0.02618	3.19207	-0.02409	3.19207	-0.02254	3.19207	0.00316	3.19207	-0.01248	3.19207	-0.0254
3.18551	0.012	3.18551	0.00169	3.18551	-0.00105	3.19384	-0.01713	3.19384	-0.01855	3.19384	-0.02526	3.19384	-0.02734	3.19384	0.000120334	3.19384	-0.00535	3.19384	-0.02149
3.18728	0.01448	3.18728	0.00187	3.18728	-0.000937179	3.1956	-0.01757	3.1956	-0.01512	3.1956	-0.02536	3.1956	-0.023	3.1956	-0.00151	3.1956	-0.00051431	3.1956	-0.01684
3.18904	0.01786	3.18904	0.00216	3.18904	-0.00101	3.19737	-0.01819	3.19737	-0.0087	3.19737	-0.02653	3.19737	-0.01555	3.19737	0.00267	3.19737	-0.00516	3.19737	-0.00965
3.1908	0.02199	3.1908	0.00248	3.1908	-0.000854913	3.19914	-0.02012	3.19914	-0.00937	3.19914	-0.02545	3.19914	-0.00752	3.19914	0.00157	3.19914	-0.0108	3.19914	-0.000730595
3.19257	0.02691	3.19257	0.0027	3.19257	-0.000550015	3.20091	-0.02189	3.20091	-0.01003	3.20091	-0.02733	3.20091	-0.00696	3.20091	0.00124	3.20091	-0.00669	3.20091	0.00185
3.19433	0.03236	3.19433	0.00274	3.19433	-0.000336658	3.20268	-0.02032	3.20268	-0.00722	3.20268	-0.02865	3.20268	-0.00695	3.20268	-0.00734	3.20268	-0.01026	3.20268	0.00493
3.1961	0.03828	3.1961	0.00285	3.1961	-0.000234949	3.20445	-0.01904	3.20445	-0.0116	3.20445	-0.02834	3.20445	-0.000525185	3.20445	-0.01281	3.20445	-0.01735	3.20445	0.00594
3.19786	0.04376	3.19786	0.00327	3.19786	-0.000289517	3.20622	-0.01737	3.20622	-0.01139	3.20622	-0.03099	3.20622	0.00641	3.20622	-0.01356	3.20622	-0.01703	3.20622	0.00471
3.19962	0.0482	3.19962	0.0042	3.19962	2.44451e-05	3.20798	-0.01426	3.20798	-0.01371	3.20798	-0.03241	3.20798	0.00649	3.20798	-0.01893	3.20798	-0.01068	3.20798	0.0073
3.20139	0.05132	3.20139	0.00532	3.20139	0.000278665	3.20975	-0.01169	3.20975	-0.00846	3.20975	-0.03513	3.20975	-0.000361151	3.20975	-0.0208	3.20975	-0.00694	3.20975	0.00425
3.20315	0.05223	3.20315	0.00663	3.20315	0.000504615	3.21152	-0.01311	3.21152	-0.01078	3.21152	-0.03492	3.21152	0.00238	3.21152	-0.01871	3.21152	-0.00292	3.21152	0.00917
3.20492	0.05077	3.20492	0.00788	3.20492	0.000763886	3.21329	-0.01616	3.21329	-0.0193	3.21329	-0.03476	3.21329	0.00263	3.21329	-0.01508	3.21329	0.00432	3.21329	0.0069
3.20668	0.04724	3.20668	0.00944	3.20668	0.0011	3.21506	-0.01781	3.21506	-0.01844	3.21506	-0.03244	3.21506	-0.00284	3.21506	-0.0145	3.21506	0.00287	3.21506	-0.00267
3.20844	0.04247	3.20844	0.01133	3.20844	0.00129	3.21683	-0.01998	3.21683	-0.02591	3.21683	-0.03083	3.21683	-0.00505	3.21683	-0.01528	3.21683	0.00319	3.21683	-0.01094
3.21021	0.03676	3.21021	0.01372	3.21021	0.00183	3.2186	-0.02166	3.2186	-0.03112	3.2186	-0.03023	3.2186	-0.000582674	3.2186	-0.00816	3.2186	0.00959	3.2186	-0.01515
3.21197	0.03071	3.21197	0.01663	3.21197	0.00249	3.22036	-0.01981	3.22036	-0.03299	3.22036	-0.03561	3.22036	0.00268	3.22036	-0.00827	3.22036	0.00821	3.22036	-0.01167
3.21373	0.02516	3.21373	0.02011	3.21373	0.00318	3.22213	-0.02091	3.22213	-0.0262	3.22213	-0.03433	3.22213	0.00363	3.22213	-0.00442	3.22213	0.01266	3.22213	-0.0162
3.2155	0.0204	3.2155	0.02406	3.2155	0.00406	3.2239	-0.02016	3.2239	-0.02701	3.2239	-0.03657	3.2239	0.00379	3.2239	-0.00154	3.2239	0.01504	3.2239	-0.01584
3.21726	0.01639	3.21726	0.02832	3.21726	0.00548	3.22567	-0.01722	3.22567	-0.02748	3.22567	-0.04428	3.22567	0.0022	3.22567	5.53046e-05	3.22567	0.02029	3.22567	-0.00638
3.21903	0.01331	3.21903	0.03314	3.21903	0.00686	3.22744	-0.01478	3.22744	-0.01461	3.22744	-0.04455	3.22744	0.00879	3.22744	-0.00899	3.22744	0.02292	3.22744	-0.000242259
3.22079	0.01089	3.22079	0.03814	3.22079	0.00811	3.22921	-0.01133	3.22921	-0.00984	3.22921	-0.04003	3.22921	0.01022	3.22921	-0.01155	3.22921	0.02365	3.22921	-0.00697
3.22255	0.00887	3.22255	0.04282	3.22255	0.0095	3.23097	-0.00673	3.23097	-0.01469	3.23097	-0.04096	3.23097	0.00513	3.23097	-0.01458	3.23097	0.01648	3.23097	-0.00786
3.22432	0.00719	3.22432	0.04684	3.22432	0.01084	3.23274	-0.00685	3.23274	-0.01216	3.23274	-0.04608	3.23274	0.0008512	3.23274	-0.01575	3.23274	0.01779	3.23274	-0.00251
3.22608	0.00582	3.22608	0.05019	3.22608	0.01297	3.23451	-0.00583	3.23451	-0.00858	3.23451	-0.04521	3.23451	0.00458	3.23451	-0.0228	3.23451	0.02173	3.23451	-0.00207
3.22784	0.00495	3.22784	0.05251	3.22784	0.01546	3.23628	-0.00207	3.23628	-0.01759	3.23628	-0.04339	3.23628	-0.00234	3.23628	-0.01972	3.23628	0.00918	3.23628	-0.00475
3.22961	0.00428	3.22961	0.05339	3.22961	0.01808	3.23805	-0.00277	3.23805	-0.02648	3.23805	-0.04363	3.23805	-0.01343	3.23805	-0.01563	3.23805	0.00402	3.23805	0.000421571
3.23137	0.0037	3.23137	0.05273	3.23137	0.02169	3.23981	-0.01046	3.23981	-0.02991	3.23981	-0.04207	3.23981	-0.01504	3.23981	-0.02501	3.23981	0.00698	3.23981	0.006
3.23313	0.00313	3.23313	0.05055	3.23313	0.02588	3.24158	-0.01204	3.24158	-0.03121	3.24158	-0.03874	3.24158	-0.01565	3.24158	-0.02289	3.24158	0.01079	3.24158	0.00653
3.2349	0.00268	3.2349	0.04711	3.2349	0.03008	3.24335	-0.00835	3.24335	-0.0386	3.24335	-0.03619	3.24335	-0.01273	3.24335	-0.02141	3.24335	0.00439	3.24335	0.00724
3.23666	0.0023	3.23666	0.0429	3.23666	0.03416	3.24512	-0.0083	3.24512	-0.03227	3.24512	-0.03113	3.24512	-0.00462	3.24512	-0.02235	3.24512	0.00753	3.24512	0.01147
3.23842	0.00194	3.23842	0.0382	3.23842	0.03831	3.24689	-0.00992	3.24689	-0.02845	3.24689	-0.03462	3.24689	0.00438	3.24689	-0.02458	3.24689	0.0188	3.24689	0.01221
3.24019	0.00178	3.24019	0.03307	3.24019	0.04251	3.24865	-0.00749	3.24865	-0.03148	3.24865	-0.03445	3.24865	0.01023	3.24865	-0.02098	3.24865	0.01723	3.24865	0.01559
3.24195	0.00156	3.24195	0.02836	3.24195	0.04645	3.25042	-0.00214	3.25042	-0.03064	3.25042	-0.03129	3.25042	0.01538	3.25042	-0.00978	3.25042	0.01308	3.25042	0.01256
3.24371	0.0014	3.24371	0.02411	3.24371	0.04963	3.25219	-0.000739138	3.25219	-0.02508	3.25219	-0.03455	3.25219	0.02863	3.25219	-0.00774	3.25219	0.01689	3.25219	0.01046
3.24548	0.00123	3.24548	0.02026	3.24548	0.05222	3.25396	-0.000315045	3.25396	-0.02455	3.25396	-0.03631	3.25396	0.02967	3.25396	-0.00703	3.25396	0.01509	3.25396	0.0109
3.24724	0.00124	3.24724	0.01693	3.24724	0.05371	3.25573	-0.00127	3.25573	-0.02611	3.25573	-0.03519	3.25573	0.02325	3.25573	0.00343	3.25573	0.01119	3.25573	0.0058
3.249	0.00122	3.249	0.01432	3.249	0.05361	3.25749	-0.0024	3.25749	-0.0244	3.25749	-0.02823	3.25749	0.02953	3.25749	0.00982	3.25749	0.01201	3.25749	0.01057
3.25077	0.00119	3.25077	0.01217	3.25077	0.05226	3.25926	-0.00444	3.25926	-0.02009	3.25926	-0.02637	3.25926	0.03167	3.25926	0.01904	3.25926	0.01446	3.25926	0.00638
3.25253	0.00137	3.25253	0.01028	3.25253	0.04976	3.26103	-0.00857	3.26103	-0.02323	3.26103	-0.02265	3.26103	0.02716	3.26103	0.01547	3.26103	0.01351	3.26103	0.00721
3.25429	0.00147	3.25429	0.00854	3.25429	0.04709	3.2628	-0.00816	3.2628	-0.02137	3.2628	-0.02193	3.2628	0.02501	3.2628	0.01186	3.2628	0.00748	3.2628	0.01003
3.25606	0.00157	3.25606	0.00698	3.25606	0.04423	3.26457	-0.00806	3.26457	-0.01609	3.26457	-0.02274	3.26457	0.02752	3.26457	0.01774	3.26457	0.00705	3.26457	0.01005
3.25782	0.00159	3.25782	0.0058	3.25782	0.04124	3.26633	-0.00926	3.26633	-0.02072	3.26633	-0.02317	3.26633	0.03275	3.26633	0.01675	3.26633	0.01473	3.26633	0.01271
3.25958	0.00141	3.25958	0.00485	3.25958	0.03801	3.2681	-0.00696	3.2681	-0.0213	3.2681	-0.0207	3.2681	0.02534	3.2681	0.00955	3.2681	0.01396	3.2681	0.00718
3.26135	0.00134	3.26135	0.00436	3.26135	0.03417	3.26987	-0.0053	3.26987	-0.01959	3.26987	-0.0164	3.26987	0.02028	3.26987	0.00583	3.26987	0.01509	3.26987	0.01507
3.26311	0.00134	3.26311	0.00386	3.26311	0.02988	3.27164	-0.00438	3.27164	-0.02084	3.27164	-0.01563	3.27164	0.02364	3.27164	0.0135	3.27164	0.01686	3.27164	0.01216
3.26487	0.00143	3.26487	0.00347	3.26487	0.02564	3.2734	0.000203646	3.2734	-0.02263	3.2734	-0.00908	3.2734	0.02194	3.2734	0.01586	3.2734	0.02168	3.2734	0.00625
3.26663	0.00141	3.26663	0.00319	3.26663	0.02178	3.27517	6.5698e-05	3.27517	-0.02518	3.27517	-0.00263	3.27517	0.02032	3.27517	0.00932	3.27517	0.02516	3.27517	0.0061
3.2684	0.00119	3.2684	0.00289	3.2684	0.01844	3.27694	0.000365115	3.27694	-0.02042	3.27694	-0.00409	3.27694	0.02054	3.27694	0.00558	3.27694	0.02518	3.27694	0.00169
3.27016	0.00108	3.27016	0.00256	3.27016	0.0157	3.27871	-0.00022952	3.27871	-0.01746	3.27871	-0.00657	3.27871	0.02282	3.27871	0.00836	3.27871	0.03753	3.27871	0.00206
3.27192	0.000859025	3.27192	0.00212	3.27192	0.01315	3.28047	0.000132739	3.28047	-0.01832	3.28047	-0.00676	3.28047	0.02056	3.28047	0.0109	3.28047	0.04112	3.28047	0.00433
3.27369	0.000799578	3.27369	0.00177	3.27369	0.01077	3.28224	-0.00328	3.28224	-0.01583	3.28224	-0.01133	3.28224	0.02511	3.28224	0.01343	3.28224	0.04386	3.28224	0.02008
3.27545	0.00092519	3.27545	0.00113	3.27545	0.00887	3.28401	-0.00432	3.28401	-0.01441	3.28401	-0.01852	3.28401	0.03507	3.28401	0.01569	3.28401	0.05523	3.28401	0.02463
3.27721	0.000991259	3.27721	0.000655815	3.27721	0.00734	3.28578	-0.00519	3.28578	-0.01251	3.28578	-0.0276	3.28578	0.04213	3.28578	0.01901	3.28578	0.06178	3.28578	0.03047
3.27898	0.00114	3.27898	0.000586737	3.27898	0.00588	3.28754	-0.00524	3.28754	-0.01657	3.28754	-0.02913	3.28754	0.04048	3.28754	0.02393	3.28754	0.06474	3.28754	0.03795
3.28074	0.00118	3.28074	0.000535563	3.28074	0.00492	3.28931	-0.00253	3.28931	-0.01947	3.28931	-0.03812	3.28931	0.04669	3.28931	0.02343	3.28931	0.06261	3.28931	0.04581
3.2825	0.00127	3.2825	0.000468681	3.2825	0.00387	3.29108	-0.00256	3.29108	-0.0173	3.29108	-0.03775	3.29108	0.05315	3.29108	0.02203	3.29108	0.06906	3.29108	0.05229
3.28426	0.00126	3.28426	0.000395768	3.28426	0.00276	3.29285	-0.00558	3.29285	-0.01815	3.29285	-0.0299	3.29285	0.05393	3.29285	0.02181	3.29285	0.06582	3.29285	0.05069
3.28603	0.00141	3.28603	0.000399763	3.28603	0.00165	3.29461	-0.000885149	3.29461	-0.02342	3.29461	-0.02159	3.29461	0.05893	3.29461	0.02048	3.29461	0.05779	3.29461	0.04894
3.28779	0.00146	3.28779	0.000321852	3.28779	0.000573233	3.29638	0.00169	3.29638	-0.02116	3.29638	-0.01651	3.29638	0.06336	3.29638	0.02089	3.29638	0.05047	3.29638	0.04571
3.28955	0.00148	3.28955	0.000239286	3.28955	1.34115e-05	3.29815	0.00539	3.29815	-0.01548	3.29815	-0.00998	3.29815	0.06921	3.29815	0.01662	3.29815	0.04204	3.29815	0.04573
3.29131	0.00143	3.29131	0.000382678	3.29131	-0.00052011	3.29992	0.00862	3.29992	-0.0166	3.29992	-0.00544	3.29992	0.06521	3.29992	0.01529	3.29992	0.03074	3.29992	0.03547
3.29308	0.00138	3.29308	0.000452309	3.29308	-0.000646844	3.30168	0.01065	3.30168	-0.01657	3.30168	-0.00375	3.30168	0.05717	3.30168	0.00929	3.30168	0.022	3.30168	0.02682
3.29484	0.00141	3.29484	0.000509331	3.29484	-0.000961739	3.30345	0.01745	3.30345	-0.01166	3.30345	-0.00796	3.30345	0.05042	3.30345	0.01165	3.30345	0.01604	3.30345	0.02333
3.2966	0.00128	3.2966	0.000645026	3.2966	-0.00136	3.30522	0.0215	3.30522	-0.00785	3.30522	-0.00725	3.30522	0.04227	3.30522	0.01253	3.30522	0.01183	3.30522	0.0203
3.29836	0.00111	3.29836	0.000570315	3.29836	-0.00159	3.30698	0.02308	3.30698	-0.00829	3.30698	-0.00201	3.30698	0.03705	3.30698	0.0168	3.30698	0.01504	3.30698	0.01743
3.30013	0.000890122	3.30013	0.000557119	3.30013	-0.00176	3.30875	0.02211	3.30875	-0.00686	3.30875	0.00123	3.30875	0.03799	3.30875	0.02403	3.30875	0.01572	3.30875	0.01976
3.30189	0.000842651	3.30189	0.000659305	3.30189	-0.00158	3.31052	0.02549	3.31052	3.6507e-05	3.31052	0.000730632	3.31052	0.03893	3.31052	0.02891	3.31052	0.02506	3.31052	0.02434
3.30365	0.000888838	3.30365	0.000686757	3.30365	-0.00116	3.31229	0.02509	3.31229	0.00156	3.31229	0.00367	3.31229	0.0376	3.31229	0.03154	3.31229	0.02572	3.31229	0.01887
3.30541	0.00116	3.30541	0.000494176	3.30541	-0.00059744	3.31405	0.01902	3.31405	0.00318	3.31405	0.00548	3.31405	0.03867	3.31405	0.02923	3.31405	0.0277	3.31405	0.02414
3.30718	0.00166	3.30718	0.000376092	3.30718	-0.000236337	3.31582	0.01835	3.31582	0.00658	3.31582	0.000263141	3.31582	0.03754	3.31582	0.02354	3.31582	0.03059	3.31582	0.02385
3.30894	0.00198	3.30894	0.000147254	3.30894	-0.000280177	3.31759	0.01654	3.31759	0.00919	3.31759	-0.00638	3.31759	0.03778	3.31759	0.01572	3.31759	0.02812	3.31759	0.02534
3.3107	0.00208	3.3107	0.0001408	3.3107	-0.000178811	3.31935	0.01258	3.31935	0.01064	3.31935	-0.01198	3.31935	0.03315	3.31935	0.01035	3.31935	0.02249	3.31935	0.02649
3.31246	0.00193	3.31246	0.000127127	3.31246	-0.000238668	3.32112	0.00547	3.32112	0.01208	3.32112	-0.01549	3.32112	0.02934	3.32112	0.00796	3.32112	0.02171	3.32112	0.02992
3.31423	0.00165	3.31423	4.25258e-05	3.31423	-0.000838486	3.32289	0.00235	3.32289	0.01298	3.32289	-0.02072	3.32289	0.01821	3.32289	0.00442	3.32289	0.02505	3.32289	0.03545
3.31599	0.00148	3.31599	0.000184701	3.31599	-0.00145	3.32465	0.00061396	3.32465	0.01596	3.32465	-0.01794	3.32465	0.00896	3.32465	0.00143	3.32465	0.01602	3.32465	0.02416
3.31775	0.0013	3.31775	-2.03649e-06	3.31775	-0.00197	3.32642	-0.00389	3.32642	0.01836	3.32642	-0.01384	3.32642	0.00588	3.32642	0.00364	3.32642	0.0118	3.32642	0.01873
3.31951	0.00115	3.31951	-0.000184595	3.31951	-0.0026	3.32819	-0.00487	3.32819	0.01685	3.32819	-0.01357	3.32819	-0.00407	3.32819	0.00685	3.32819	0.00978	3.32819	0.01285
3.32128	0.00107	3.32128	-0.000332906	3.32128	-0.00281	3.32995	-0.00889	3.32995	0.01659	3.32995	-0.01216	3.32995	-0.00812	3.32995	0.00834	3.32995	0.0125	3.32995	0.00060173
3.32304	0.00121	3.32304	-0.000388099	3.32304	-0.00307	3.33172	-0.01138	3.33172	0.01255	3.33172	-0.01366	3.33172	-0.00528	3.33172	0.00931	3.33172	0.012	3.33172	-0.000813468
3.3248	0.00136	3.3248	-0.000251453	3.3248	-0.00293	3.33349	-0.01432	3.33349	0.00905	3.33349	-0.01605	3.33349	-0.00855	3.33349	0.00855	3.33349	0.01091	3.33349	-0.00762
3.32656	0.00148	3.32656	-3.79784e-05	3.32656	-0.0027	3.33525	-0.01818	3.33525	0.00655	3.33525	-0.01976	3.33525	-0.01281	3.33525	0.00522	3.33525	0.01617	3.33525	0.00226
3.32832	0.0017	3.32832	0.000398626	3.32832	-0.00229	3.33702	-0.01512	3.33702	0.00317	3.33702	-0.01928	3.33702	-0.01094	3.33702	0.00283	3.33702	0.022	3.33702	-7.69391e-05
3.33009	0.0018	3.33009	0.000651159	3.33009	-0.00177	3.33879	-0.01434	3.33879	-0.000871158	3.33879	-0.01724	3.33879	-0.00968	3.33879	0.00419	3.33879	0.02728	3.33879	-0.00677
3.33185	0.00208	3.33185	0.000949687	3.33185	-0.00172	3.34055	-0.01244	3.34055	-0.00378	3.34055	-0.01933	3.34055	-0.011	3.34055	0.00396	3.34055	0.02869	3.34055	-0.00604
3.33361	0.00225	3.33361	0.00136	3.33361	-0.00149	3.34232	-0.0052	3.34232	-0.00661	3.34232	-0.01754	3.34232	-0.00388	3.34232	0.00697	3.34232	0.02708	3.34232	-0.01241
3.33537	0.00242	3.33537	0.00155	3.33537	-0.000830819	3.34409	0.000329663	3.34409	-0.01283	3.34409	-0.01771	3.34409	0.000688991	3.34409	0.01312	3.34409	0.03095	3.34409	-0.01111
3.33713	0.00264	3.33713	0.00168	3.33713	-0.000655443	3.34585	0.00424	3.34585	-0.01625	3.34585	-0.01644	3.34585	-0.000559865	3.34585	0.0189	3.34585	0.02666	3.34585	-0.01462
3.3389	0.00283	3.3389	0.00186	3.3389	-0.00054699	3.34762	0.00946	3.34762	-0.0134	3.34762	-0.01931	3.34762	-0.000983981	3.34762	0.01938	3.34762	0.02066	3.34762	-0.01297
3.34066	0.00281	3.34066	0.00208	3.34066	-0.00032511	3.34939	0.01099	3.34939	-0.01684	3.34939	-0.0234	3.34939	0.00117	3.34939	0.01637	3.34939	0.01564	3.34939	-0.01122
3.34242	0.00271	3.34242	0.00229	3.34242	0.000187457	3.35115	0.01151	3.35115	-0.02164	3.35115	-0.0215	3.35115	0.00156	3.35115	0.01552	3.35115	0.01672	3.35115	-0.02014
3.34418	0.00279	3.34418	0.00268	3.34418	0.00042583	3.35292	0.01308	3.35292	-0.0179	3.35292	-0.01719	3.35292	-0.00629	3.35292	0.01402	3.35292	0.01885	3.35292	-0.02065
3.34594	0.00317	3.34594	0.00322	3.34594	0.000635411	3.35469	0.01449	3.35469	-0.0182	3.35469	-0.01901	3.35469	-0.000122057	3.35469	0.00885	3.35469	0.01957	3.35469	-0.02153
3.34771	0.00342	3.34771	0.00346	3.34771	0.000659152	3.35645	0.008	3.35645	-0.01395	3.35645	-0.02069	3.35645	-0.0017	3.35645	0.00391	3.35645	0.02229	3.35645	-0.02238
3.34947	0.00367	3.34947	0.00346	3.34947	0.000782928	3.35822	-0.000313869	3.35822	-0.0118	3.35822	-0.01612	3.35822	-0.00392	3.35822	0.00348	3.35822	0.02081	3.35822	-0.02052
3.35123	0.00404	3.35123	0.00369	3.35123	0.00111	3.35999	-0.00253	3.35999	-0.00479	3.35999	-0.01617	3.35999	-0.00594	3.35999	0.000245176	3.35999	0.01973	3.35999	-0.00832
3.35299	0.00428	3.35299	0.00379	3.35299	0.00121	3.36175	-0.00928	3.36175	-0.00451	3.36175	-0.02215	3.36175	-0.00956	3.36175	-0.00104	3.36175	0.01831	3.36175	0.000969253
3.35475	0.00463	3.35475	0.00379	3.35475	0.00135	3.36352	-0.01541	3.36352	-0.00289	3.36352	-0.02294	3.36352	-0.01061	3.36352	-0.00226	3.36352	0.01818	3.36352	0.00979
3.35651	0.00508	3.35651	0.00406	3.35651	0.00176	3.36529	-0.01356	3.36529	-0.00222	3.36529	-0.02057	3.36529	-0.01341	3.36529	-0.00846	3.36529	0.01107	3.36529	0.00903
3.35828	0.00588	3.35828	0.00461	3.35828	0.00222	3.36705	-0.00868	3.36705	-0.00517	3.36705	-0.02609	3.36705	-0.01224	3.36705	-0.01064	3.36705	0.00277	3.36705	0.01372
3.36004	0.00653	3.36004	0.00513	3.36004	0.00259	3.36882	-0.00633	3.36882	-0.00382	3.36882	-0.03193	3.36882	-0.00677	3.36882	-0.00971	3.36882	0.00389	3.36882	0.00942
3.3618	0.00697	3.3618	0.00567	3.3618	0.00298	3.37058	-0.00259	3.37058	-0.00775	3.37058	-0.02959	3.37058	-0.00741	3.37058	-0.00432	3.37058	0.000559532	3.37058	-0.0021
3.36356	0.00747	3.36356	0.00636	3.36356	0.00377	3.37235	0.00164	3.37235	-0.01131	3.37235	-0.0272	3.37235	-0.00478	3.37235	-0.000208784	3.37235	-0.00537	3.37235	-0.00626
3.36532	0.00821	3.36532	0.00713	3.36532	0.00471	3.37412	0.00211	3.37412	-0.01153	3.37412	-0.02558	3.37412	-0.00544	3.37412	-0.00284	3.37412	-0.00715	3.37412	-0.01438
3.36708	0.00893	3.36708	0.0077	3.36708	0.00588	3.37588	0.00299	3.37588	-0.01037	3.37588	-0.02301	3.37588	-0.01096	3.37588	0.00112	3.37588	-0.00304	3.37588	-0.01
3.36885	0.00963	3.36885	0.00822	3.36885	0.00722	3.37765	0.00641	3.37765	-0.01258	3.37765	-0.01672	3.37765	-0.01636	3.37765	0.00217	3.37765	0.000399463	3.37765	-0.00886
3.37061	0.01057	3.37061	0.00895	3.37061	0.00841	3.37942	0.00601	3.37942	-0.01485	3.37942	-0.01323	3.37942	-0.02075	3.37942	-0.0046	3.37942	-0.00165	3.37942	-0.00852
3.37237	0.01177	3.37237	0.00963	3.37237	0.00973	3.38118	0.00509	3.38118	-0.01346	3.38118	-0.01207	3.38118	-0.0206	3.38118	-0.00642	3.38118	-0.00147	3.38118	-0.0025
3.37413	0.01309	3.37413	0.01054	3.37413	0.01119	3.38295	0.00435	3.38295	-0.01318	3.38295	-0.01148	3.38295	-0.0158	3.38295	-0.00796	3.38295	0.0081	3.38295	-0.0041
3.37589	0.01468	3.37589	0.01167	3.37589	0.01286	3.38471	0.00194	3.38471	-0.0146	3.38471	-0.00835	3.38471	-0.00819	3.38471	-0.0087	3.38471	0.01303	3.38471	-0.00287
3.37765	0.01669	3.37765	0.01288	3.37765	0.01464	3.38648	-0.00040292	3.38648	-0.01476	3.38648	-0.0043	3.38648	-0.01103	3.38648	-0.01213	3.38648	0.00877	3.38648	-0.00401
3.37941	0.0191	3.37941	0.01456	3.37941	0.0166	3.38825	-0.00488	3.38825	-0.01274	3.38825	-0.00225	3.38825	-0.01247	3.38825	-0.01079	3.38825	0.01479	3.38825	0.00253
3.38118	0.02231	3.38118	0.0168	3.38118	0.01902	3.39001	-0.00549	3.39001	-0.00582	3.39001	-0.00363	3.39001	-0.00922	3.39001	-0.0117	3.39001	0.01829	3.39001	0.00293
3.38294	0.02657	3.38294	0.01968	3.38294	0.02216	3.39178	-0.00832	3.39178	-0.00238	3.39178	-0.00836	3.39178	-0.00636	3.39178	-0.01005	3.39178	0.01622	3.39178	0.00316
3.3847	0.03218	3.3847	0.0229	3.3847	0.02567	3.39354	-0.01303	3.39354	-0.000322633	3.39354	-0.01165	3.39354	-0.00776	3.39354	-0.0079	3.39354	0.01799	3.39354	0.00809
3.38646	0.03948	3.38646	0.02674	3.38646	0.02963	3.39531	-0.01269	3.39531	0.00731	3.39531	-0.01566	3.39531	-0.0084	3.39531	-0.00135	3.39531	0.0288	3.39531	0.01214
3.38822	0.04869	3.38822	0.03132	3.38822	0.03395	3.39707	-0.00915	3.39707	0.01028	3.39707	-0.01799	3.39707	-0.00231	3.39707	-0.00488	3.39707	0.03031	3.39707	0.01567
3.38998	0.06091	3.38998	0.0371	3.38998	0.03869	3.39884	-0.00307	3.39884	0.00604	3.39884	-0.016	3.39884	0.00394	3.39884	-0.00573	3.39884	0.02694	3.39884	0.0136
3.39174	0.07723	3.39174	0.0439	3.39174	0.04438	3.40061	-0.00244	3.40061	0.00733	3.40061	-0.00771	3.40061	0.00804	3.40061	-0.00588	3.40061	0.03115	3.40061	0.0069
3.3935	0.09816	3.3935	0.05216	3.3935	0.05146	3.40237	-0.000371499	3.40237	0.00918	3.40237	-0.00388	3.40237	0.00619	3.40237	-0.00852	3.40237	0.03045	3.40237	0.00233
3.39527	0.12528	3.39527	0.06263	3.39527	0.06028	3.40414	0.00454	3.40414	0.00425	3.40414	-0.00241	3.40414	-0.000941545	3.40414	-0.0052	3.40414	0.01928	3.40414	0.00204
3.39703	0.15886	3.39703	0.07569	3.39703	0.0709	3.4059	0.00572	3.4059	-0.00555	3.4059	0.004	3.4059	0.000753099	3.4059	-0.00503	3.4059	0.01732	3.4059	-0.00617
3.39879	0.19572	3.39879	0.0919	3.39879	0.08397	3.40767	0.00981	3.40767	-0.01057	3.40767	0.00456	3.40767	0.000130953	3.40767	0.000983943	3.40767	0.01969	3.40767	-0.00598
3.40055	0.23436	3.40055	0.11265	3.40055	0.09959	3.40944	0.01179	3.40944	-0.01217	3.40944	0.00213	3.40944	-0.00882	3.40944	0.00679	3.40944	0.01246	3.40944	0.000645384
3.40231	0.26892	3.40231	0.13763	3.40231	0.11872	3.4112	0.01175	3.4112	-0.01423	3.4112	0.00267	3.4112	-0.00797	3.4112	0.01616	3.4112	0.01077	3.4112	0.01151
3.40407	0.29469	3.40407	0.16672	3.40407	0.14139	3.41297	0.01142	3.41297	-0.01698	3.41297	0.00506	3.41297	-0.00366	3.41297	0.01821	3.41297	0.01219	3.41297	0.0106
3.40583	0.3083	3.40583	0.19982	3.40583	0.16833	3.41473	0.0113	3.41473	-0.01146	3.41473	0.01142	3.41473	0.0014	3.41473	0.0208	3.41473	0.01158	3.41473	0.01192
3.40759	0.30853	3.40759	0.23472	3.40759	0.20096	3.4165	0.00643	3.4165	-0.00989	3.4165	0.01563	3.4165	0.00307	3.4165	0.02348	3.4165	0.00922	3.4165	0.01391
3.40935	0.29794	3.40935	0.26796	3.40935	0.23845	3.41826	0.00615	3.41826	-0.0079	3.41826	0.02937	3.41826	0.00528	3.41826	0.02618	3.41826	0.00984	3.41826	0.00831
3.41111	0.27856	3.41111	0.29684	3.41111	0.2783	3.42003	0.00519	3.42003	-0.00896	3.42003	0.04395	3.42003	0.00919	3.42003	0.02495	3.42003	0.0103	3.42003	0.00545
3.41288	0.25547	3.41288	0.31615	3.41288	0.31921	3.42179	0.01023	3.42179	-0.00921	3.42179	0.06091	3.42179	0.00232	3.42179	0.0203	3.42179	0.0038	3.42179	0.00334
3.41464	0.23295	3.41464	0.3239	3.41464	0.35736	3.42356	0.01396	3.42356	-0.0051	3.42356	0.0804	3.42356	-0.00373	3.42356	0.01804	3.42356	0.00726	3.42356	0.00636
3.4164	0.21387	3.4164	0.31932	3.4164	0.3874	3.42533	0.0203	3.42533	0.00356	3.42533	0.09652	3.42533	-0.00673	3.42533	0.01556	3.42533	0.01118	3.42533	0.0117
3.41816	0.20079	3.41816	0.30422	3.41816	0.40607	3.42709	0.02282	3.42709	0.0148	3.42709	0.11682	3.42709	-0.00526	3.42709	0.01927	3.42709	0.01314	3.42709	0.01449
3.41992	0.19469	3.41992	0.28126	3.41992	0.41101	3.42886	0.02462	3.42886	0.02781	3.42886	0.13325	3.42886	-0.0039	3.42886	0.02468	3.42886	0.01303	3.42886	0.01827
3.42168	0.19645	3.42168	0.25294	3.42168	0.40212	3.43062	0.02882	3.43062	0.04002	3.43062	0.15094	3.43062	0.00468	3.43062	0.03043	3.43062	0.01553	3.43062	0.01387
3.42344	0.20548	3.42344	0.22384	3.42344	0.38021	3.43239	0.03331	3.43239	0.05657	3.43239	0.16919	3.43239	0.01303	3.43239	0.03142	3.43239	0.02541	3.43239	0.02338
3.4252	0.22023	3.4252	0.19533	3.4252	0.34921	3.43415	0.04109	3.43415	0.07979	3.43415	0.19038	3.43415	0.02079	3.43415	0.0342	3.43415	0.02946	3.43415	0.03256
3.42696	0.24009	3.42696	0.16841	3.42696	0.31408	3.43592	0.05286	3.43592	0.10951	3.43592	0.21884	3.43592	0.02257	3.43592	0.03974	3.43592	0.02986	3.43592	0.04058
3.42872	0.26264	3.42872	0.14492	3.42872	0.2768	3.43768	0.07191	3.43768	0.1422	3.43768	0.24374	3.43768	0.0286	3.43768	0.03628	3.43768	0.03149	3.43768	0.05293
3.43048	0.28428	3.43048	0.12486	3.43048	0.24066	3.43945	0.09624	3.43945	0.17536	3.43945	0.26782	3.43945	0.03292	3.43945	0.03287	3.43945	0.03644	3.43945	0.07243
3.43224	0.30207	3.43224	0.10738	3.43224	0.20806	3.44121	0.12074	3.44121	0.21599	3.44121	0.28567	3.44121	0.03684	3.44121	0.03731	3.44121	0.03945	3.44121	0.08867
3.434	0.31213	3.434	0.09306	3.434	0.17951	3.44298	0.14959	3.44298	0.27839	3.44298	0.30558	3.44298	0.04227	3.44298	0.03377	3.44298	0.04611	3.44298	0.10025
3.43576	0.31211	3.43576	0.08151	3.43576	0.15457	3.44474	0.17906	3.44474	0.33908	3.44474	0.32685	3.44474	0.05665	3.44474	0.03177	3.44474	0.05342	3.44474	0.11175
3.43753	0.30153	3.43753	0.07199	3.43753	0.13302	3.44651	0.20582	3.44651	0.39426	3.44651	0.33725	3.44651	0.06153	3.44651	0.03575	3.44651	0.06779	3.44651	0.12198
3.43929	0.28182	3.43929	0.06463	3.43929	0.11423	3.44827	0.22181	3.44827	0.43536	3.44827	0.32813	3.44827	0.06916	3.44827	0.03761	3.44827	0.06463	3.44827	0.13964
3.44105	0.25454	3.44105	0.05897	3.44105	0.09856	3.45004	0.22861	3.45004	0.45633	3.45004	0.31953	3.45004	0.07579	3.45004	0.0346	3.45004	0.0736	3.45004	0.15184
3.44281	0.22297	3.44281	0.05502	3.44281	0.08607	3.4518	0.23138	3.4518	0.45814	3.4518	0.30653	3.4518	0.07811	3.4518	0.03706	3.4518	0.07503	3.4518	0.17449
3.44457	0.1917	3.44457	0.05245	3.44457	0.07564	3.45357	0.22441	3.45357	0.42183	3.45357	0.27657	3.45357	0.09625	3.45357	0.04528	3.45357	0.07521	3.45357	0.18172
3.44633	0.16248	3.44633	0.05097	3.44633	0.06683	3.45533	0.20784	3.45533	0.38554	3.45533	0.24362	3.45533	0.11876	3.45533	0.05248	3.45533	0.07686	3.45533	0.17842
3.44809	0.13547	3.44809	0.05067	3.44809	0.05935	3.4571	0.18787	3.4571	0.34424	3.4571	0.22176	3.4571	0.14353	3.4571	0.06324	3.4571	0.08008	3.4571	0.18582
3.44985	0.11267	3.44985	0.05172	3.44985	0.05327	3.45886	0.16912	3.45886	0.30408	3.45886	0.20879	3.45886	0.16502	3.45886	0.07923	3.45886	0.09785	3.45886	0.18556
3.45161	0.09313	3.45161	0.05404	3.45161	0.04823	3.46063	0.14537	3.46063	0.26718	3.46063	0.18741	3.46063	0.18793	3.46063	0.09227	3.46063	0.106	3.46063	0.19018
3.45337	0.07684	3.45337	0.05719	3.45337	0.04402	3.46239	0.12286	3.46239	0.22956	3.46239	0.16285	3.46239	0.21549	3.46239	0.1055	3.46239	0.11224	3.46239	0.19156
3.45513	0.06382	3.45513	0.06109	3.45513	0.041	3.46416	0.10572	3.46416	0.18749	3.46416	0.14962	3.46416	0.25199	3.46416	0.12158	3.46416	0.12375	3.46416	0.19475
3.45689	0.0534	3.45689	0.06629	3.45689	0.03886	3.46592	0.09255	3.46592	0.15273	3.46592	0.12836	3.46592	0.28734	3.46592	0.13941	3.46592	0.14044	3.46592	0.20646
3.45865	0.0448	3.45865	0.07287	3.45865	0.03747	3.46769	0.08027	3.46769	0.13548	3.46769	0.11241	3.46769	0.33143	3.46769	0.1588	3.46769	0.15426	3.46769	0.20933
3.46041	0.03798	3.46041	0.08043	3.46041	0.03662	3.46945	0.06779	3.46945	0.11394	3.46945	0.09643	3.46945	0.37775	3.46945	0.17978	3.46945	0.16674	3.46945	0.21725
3.46217	0.03229	3.46217	0.0897	3.46217	0.03651	3.47122	0.06057	3.47122	0.09731	3.47122	0.08708	3.47122	0.41802	3.47122	0.20444	3.47122	0.19133	3.47122	0.22112
3.46393	0.0277	3.46393	0.10016	3.46393	0.03657	3.47298	0.05133	3.47298	0.08122	3.47298	0.07824	3.47298	0.44981	3.47298	0.24821	3.47298	0.21917	3.47298	0.22898
3.46569	0.02397	3.46569	0.11199	3.46569	0.0372	3.47475	0.03819	3.47475	0.06398	3.47475	0.06508	3.47475	0.46718	3.47475	0.2794	3.47475	0.235	3.47475	0.23997
3.46745	0.02087	3.46745	0.1256	3.46745	0.03823	3.47651	0.02203	3.47651	0.04442	3.47651	0.05462	3.47651	0.47234	3.47651	0.31136	3.47651	0.25582	3.47651	0.24846
3.46921	0.01837	3.46921	0.14073	3.46921	0.03948	3.47828	0.01033	3.47828	0.02747	3.47828	0.04327	3.47828	0.45567	3.47828	0.34978	3.47828	0.27252	3.47828	0.25569
3.47097	0.01637	3.47097	0.15666	3.47097	0.04133	3.48004	0.00515	3.48004	0.01444	3.48004	0.03336	3.48004	0.43646	3.48004	0.37179	3.48004	0.29008	3.48004	0.27474
3.47273	0.01468	3.47273	0.17387	3.47273	0.04376	3.48181	0.00111	3.48181	0.00148	3.48181	0.02429	3.48181	0.40726	3.48181	0.40143	3.48181	0.31867	3.48181	0.29405
3.47449	0.01337	3.47449	0.19024	3.47449	0.04656	3.48357	-0.000247835	3.48357	-0.01016	3.48357	0.02044	3.48357	0.37688	3.48357	0.43438	3.48357	0.3326	3.48357	0.31281
3.47625	0.01226	3.47625	0.20521	3.47625	0.04964	3.48533	0.00387	3.48533	-0.01581	3.48533	0.01702	3.48533	0.34647	3.48533	0.44034	3.48533	0.36048	3.48533	0.34641
3.47801	0.01101	3.47801	0.21887	3.47801	0.05313	3.4871	0.00552	3.4871	-0.0188	3.4871	0.00614	3.4871	0.31386	3.4871	0.44164	3.4871	0.40275	3.4871	0.38225
3.47977	0.00995	3.47977	0.22925	3.47977	0.0574	3.48886	0.00988	3.48886	-0.02201	3.48886	-0.00117	3.48886	0.2862	3.48886	0.43393	3.48886	0.43072	3.48886	0.40669
3.48153	0.0093	3.48153	0.23539	3.48153	0.06241	3.49063	0.00958	3.49063	-0.02544	3.49063	-0.00491	3.49063	0.26888	3.49063	0.42195	3.49063	0.45077	3.49063	0.44047
3.48329	0.00863	3.48329	0.23669	3.48329	0.06823	3.49239	0.01225	3.49239	-0.02814	3.49239	-0.01225	3.49239	0.24454	3.49239	0.38623	3.49239	0.47775	3.49239	0.47542
3.48505	0.00796	3.48505	0.23344	3.48505	0.07461	3.49416	0.01448	3.49416	-0.03258	3.49416	-0.01958	3.49416	0.21786	3.49416	0.35724	3.49416	0.48538	3.49416	0.49142
3.48681	0.00731	3.48681	0.22564	3.48681	0.08182	3.49592	0.01653	3.49592	-0.03058	3.49592	-0.02141	3.49592	0.20555	3.49592	0.33607	3.49592	0.47546	3.49592	0.51406
3.48857	0.00677	3.48857	0.21307	3.48857	0.08989	3.49769	0.01632	3.49769	-0.0309	3.49769	-0.02416	3.49769	0.19789	3.49769	0.30767	3.49769	0.46054	3.49769	0.53925
3.49033	0.00624	3.49033	0.19813	3.49033	0.09884	3.49945	0.0147	3.49945	-0.02973	3.49945	-0.03263	3.49945	0.19078	3.49945	0.28914	3.49945	0.4435	3.49945	0.53863
3.49209	0.00562	3.49209	0.18164	3.49209	0.10907	3.50121	0.01275	3.50121	-0.02674	3.50121	-0.03166	3.50121	0.18209	3.50121	0.26251	3.50121	0.41423	3.50121	0.54497
3.49385	0.00511	3.49385	0.1642	3.49385	0.12027	3.50298	0.00934	3.50298	-0.02638	3.50298	-0.03548	3.50298	0.17279	3.50298	0.23183	3.50298	0.38323	3.50298	0.54275
3.49561	0.0049	3.49561	0.14738	3.49561	0.13219	3.50474	0.00635	3.50474	-0.02695	3.50474	-0.03251	3.50474	0.16034	3.50474	0.21331	3.50474	0.36547	3.50474	0.53408
3.49737	0.00494	3.49737	0.13174	3.49737	0.14425	3.50651	0.00231	3.50651	-0.02867	3.50651	-0.02104	3.50651	0.14053	3.50651	0.1878	3.50651	0.32817	3.50651	0.51254
3.49913	0.00496	3.49913	0.11675	3.49913	0.15616	3.50827	-0.00175	3.50827	-0.0325	3.50827	-0.00848	3.50827	0.13395	3.50827	0.16507	3.50827	0.30503	3.50827	0.49299
3.50089	0.00487	3.50089	0.10356	3.50089	0.16822	3.51004	-0.00454	3.51004	-0.03488	3.51004	0.00458	3.51004	0.11664	3.51004	0.14978	3.51004	0.29106	3.51004	0.47635
3.50265	0.00474	3.50265	0.09165	3.50265	0.18036	3.5118	-0.00793	3.5118	-0.03208	3.5118	0.01111	3.5118	0.10631	3.5118	0.13475	3.5118	0.26995	3.5118	0.44505
3.50441	0.00457	3.50441	0.08065	3.50441	0.19113	3.51356	-0.01001	3.51356	-0.03456	3.51356	0.01772	3.51356	0.10327	3.51356	0.11312	3.51356	0.2524	3.51356	0.42189
3.50617	0.00457	3.50617	0.07097	3.50617	0.20002	3.51533	-0.00683	3.51533	-0.03492	3.51533	0.01581	3.51533	0.10137	3.51533	0.10642	3.51533	0.23764	3.51533	0.38997
3.50792	0.00438	3.50792	0.06224	3.50792	0.20724	3.51709	-0.00611	3.51709	-0.03026	3.51709	0.00588	3.51709	0.09932	3.51709	0.09923	3.51709	0.22521	3.51709	0.35792
3.50968	0.00399	3.50968	0.05452	3.50968	0.21218	3.51886	-0.00491	3.51886	-0.02812	3.51886	0.0023	3.51886	0.09114	3.51886	0.09052	3.51886	0.20696	3.51886	0.3292
3.51144	0.00351	3.51144	0.04814	3.51144	0.21442	3.52062	0.00134	3.52062	-0.03162	3.52062	-0.00111	3.52062	0.08813	3.52062	0.08282	3.52062	0.19032	3.52062	0.29789
3.5132	0.00322	3.5132	0.04265	3.5132	0.21365	3.52238	0.00581	3.52238	-0.03303	3.52238	-0.00296	3.52238	0.07901	3.52238	0.07964	3.52238	0.18529	3.52238	0.27441
3.51496	0.00306	3.51496	0.03791	3.51496	0.21017	3.52415	0.00984	3.52415	-0.02878	3.52415	-0.00691	3.52415	0.06826	3.52415	0.07991	3.52415	0.1736	3.52415	0.25747
3.51672	0.00283	3.51672	0.03379	3.51672	0.20427	3.52591	0.00712	3.52591	-0.02627	3.52591	-0.00453	3.52591	0.06193	3.52591	0.07221	3.52591	0.15893	3.52591	0.24266
3.51848	0.00291	3.51848	0.03015	3.51848	0.19558	3.52768	0.00449	3.52768	-0.0278	3.52768	0.000928427	3.52768	0.04875	3.52768	0.07219	3.52768	0.15488	3.52768	0.2193
3.52024	0.00306	3.52024	0.02711	3.52024	0.18455	3.52944	0.00111	3.52944	-0.02384	3.52944	-0.000377885	3.52944	0.03287	3.52944	0.07447	3.52944	0.15242	3.52944	0.19981
3.522	0.00316	3.522	0.02446	3.522	0.17285	3.5312	0.000568257	3.5312	-0.02108	3.5312	-0.00331	3.5312	0.02687	3.5312	0.07451	3.5312	0.14038	3.5312	0.17073
3.52376	0.00306	3.52376	0.02199	3.52376	0.16011	3.53297	-0.00387	3.53297	-0.01737	3.53297	-0.00277	3.53297	0.02174	3.53297	0.06975	3.53297	0.12326	3.53297	0.14804
3.52552	0.00301	3.52552	0.01973	3.52552	0.14773	3.53473	-0.00498	3.53473	-0.01599	3.53473	0.0021	3.53473	0.01239	3.53473	0.07028	3.53473	0.11991	3.53473	0.13732
3.52728	0.00303	3.52728	0.01782	3.52728	0.13577	3.53649	-0.00399	3.53649	-0.00971	3.53649	0.00494	3.53649	0.01334	3.53649	0.07943	3.53649	0.1112	3.53649	0.12359
3.52904	0.00302	3.52904	0.01606	3.52904	0.12483	3.53826	-0.00435	3.53826	-0.00511	3.53826	0.00255	3.53826	0.01526	3.53826	0.07819	3.53826	0.0957	3.53826	0.11422
3.5308	0.00314	3.5308	0.01465	3.5308	0.11397	3.54002	-0.00535	3.54002	-0.0014	3.54002	0.00223	3.54002	0.02028	3.54002	0.07791	3.54002	0.09362	3.54002	0.11346
3.53255	0.00338	3.53255	0.01375	3.53255	0.10351	3.54179	-0.00231	3.54179	-0.00314	3.54179	0.00387	3.54179	0.0234	3.54179	0.07747	3.54179	0.09299	3.54179	0.12019
3.53431	0.00375	3.53431	0.01304	3.53431	0.09409	3.54355	-0.00225	3.54355	-0.00686	3.54355	-0.00507	3.54355	0.02622	3.54355	0.07172	3.54355	0.08776	3.54355	0.12198
3.53607	0.00402	3.53607	0.01248	3.53607	0.08545	3.54531	0.00154	3.54531	-0.00833	3.54531	-0.00204	3.54531	0.02492	3.54531	0.06398	3.54531	0.08297	3.54531	0.12723
3.53783	0.00443	3.53783	0.01196	3.53783	0.07764	3.54708	0.00674	3.54708	-0.00451	3.54708	-0.00556	3.54708	0.02496	3.54708	0.06075	3.54708	0.08068	3.54708	0.13471
3.53959	0.00506	3.53959	0.0114	3.53959	0.0704	3.54884	0.00618	3.54884	-0.00181	3.54884	-0.00802	3.54884	0.02581	3.54884	0.06253	3.54884	0.08411	3.54884	0.13353
3.54135	0.00596	3.54135	0.01096	3.54135	0.06392	3.5506	0.00578	3.5506	-0.00149	3.5506	-0.00699	3.5506	0.02465	3.5506	0.05882	3.5506	0.07793	3.5506	0.13273
3.54311	0.00706	3.54311	0.01065	3.54311	0.05823	3.55237	0.00491	3.55237	0.01159	3.55237	-0.0023	3.55237	0.02436	3.55237	0.05335	3.55237	0.08018	3.55237	0.13567
3.54487	0.00873	3.54487	0.01041	3.54487	0.05347	3.55413	0.000354197	3.55413	0.01871	3.55413	-0.000501148	3.55413	0.03285	3.55413	0.05496	3.55413	0.08126	3.55413	0.13515
3.54663	0.01082	3.54663	0.01022	3.54663	0.04969	3.55589	-0.00398	3.55589	0.01921	3.55589	-0.00492	3.55589	0.03196	3.55589	0.05395	3.55589	0.08654	3.55589	0.12332
3.54838	0.01333	3.54838	0.01024	3.54838	0.04617	3.55766	-0.00278	3.55766	0.017	3.55766	-0.00372	3.55766	0.03174	3.55766	0.05044	3.55766	0.09509	3.55766	0.12775
3.55014	0.01697	3.55014	0.01064	3.55014	0.04314	3.55942	0.000382422	3.55942	0.02106	3.55942	0.000415695	3.55942	0.03221	3.55942	0.04469	3.55942	0.10223	3.55942	0.1305
3.5519	0.02174	3.5519	0.0109	3.5519	0.04032	3.56118	0.00226	3.56118	0.01801	3.56118	-0.0048	3.56118	0.03572	3.56118	0.04671	3.56118	0.11236	3.56118	0.12403
3.55366	0.02771	3.55366	0.01138	3.55366	0.03756	3.56295	0.0122	3.56295	0.01094	3.56295	-0.00802	3.56295	0.03399	3.56295	0.04754	3.56295	0.11894	3.56295	0.12418
3.55542	0.0351	3.55542	0.01219	3.55542	0.03521	3.56471	0.01715	3.56471	0.0093	3.56471	-0.00395	3.56471	0.02993	3.56471	0.04974	3.56471	0.11829	3.56471	0.12782
3.55718	0.04376	3.55718	0.0135	3.55718	0.03331	3.56647	0.02174	3.56647	0.00813	3.56647	-0.00593	3.56647	0.03469	3.56647	0.05744	3.56647	0.12238	3.56647	0.12171
3.55894	0.05305	3.55894	0.01517	3.55894	0.032	3.56824	0.02355	3.56824	0.000421033	3.56824	-0.00444	3.56824	0.0415	3.56824	0.06653	3.56824	0.12781	3.56824	0.12116
3.5607	0.06268	3.5607	0.01749	3.5607	0.0311	3.57	0.02186	3.57	-0.000488488	3.57	-0.00216	3.57	0.04369	3.57	0.07651	3.57	0.12749	3.57	0.12701
3.56245	0.07037	3.56245	0.02041	3.56245	0.03064	3.57176	0.02132	3.57176	0.00236	3.57176	0.00679	3.57176	0.03958	3.57176	0.0819	3.57176	0.12956	3.57176	0.12927
3.56421	0.07567	3.56421	0.02445	3.56421	0.03082	3.57353	0.0198	3.57353	0.0073	3.57353	0.01275	3.57353	0.03743	3.57353	0.08735	3.57353	0.13828	3.57353	0.13248
3.56597	0.07747	3.56597	0.02945	3.56597	0.03175	3.57529	0.01651	3.57529	0.01222	3.57529	0.01871	3.57529	0.03923	3.57529	0.09226	3.57529	0.13435	3.57529	0.14625
3.56773	0.07533	3.56773	0.03529	3.56773	0.03348	3.57705	0.01756	3.57705	0.01512	3.57705	0.03115	3.57705	0.0406	3.57705	0.09849	3.57705	0.13346	3.57705	0.15443
3.56949	0.06985	3.56949	0.04252	3.56949	0.03599	3.57882	0.02106	3.57882	0.01892	3.57882	0.03447	3.57882	0.03634	3.57882	0.10446	3.57882	0.14183	3.57882	0.1654
3.57125	0.06191	3.57125	0.05096	3.57125	0.03957	3.58058	0.02566	3.58058	0.01511	3.58058	0.04045	3.58058	0.03611	3.58058	0.11204	3.58058	0.14892	3.58058	0.16958
3.57301	0.05364	3.57301	0.05939	3.57301	0.04397	3.58234	0.03307	3.58234	0.01472	3.58234	0.04199	3.58234	0.03757	3.58234	0.12035	3.58234	0.14504	3.58234	0.1731
3.57476	0.04508	3.57476	0.06722	3.57476	0.04944	3.58411	0.03749	3.58411	0.01623	3.58411	0.04008	3.58411	0.04112	3.58411	0.11709	3.58411	0.14811	3.58411	0.17874
3.57652	0.03699	3.57652	0.07388	3.57652	0.05604	3.58587	0.04414	3.58587	0.01398	3.58587	0.03983	3.58587	0.04139	3.58587	0.11682	3.58587	0.1513	3.58587	0.17521
3.57828	0.03008	3.57828	0.07855	3.57828	0.06401	3.58763	0.04926	3.58763	0.01233	3.58763	0.03871	3.58763	0.04392	3.58763	0.11515	3.58763	0.14594	3.58763	0.17862
3.58004	0.02403	3.58004	0.08061	3.58004	0.07312	3.58939	0.05682	3.58939	0.01465	3.58939	0.0441	3.58939	0.04783	3.58939	0.11089	3.58939	0.13983	3.58939	0.18047
3.5818	0.01894	3.5818	0.07934	3.5818	0.08232	3.59116	0.0591	3.59116	0.01607	3.59116	0.04128	3.59116	0.05371	3.59116	0.10244	3.59116	0.12981	3.59116	0.18806
3.58356	0.01493	3.58356	0.07565	3.58356	0.09046	3.59292	0.06343	3.59292	0.01979	3.59292	0.03763	3.59292	0.0489	3.59292	0.09188	3.59292	0.12664	3.59292	0.18727
3.58531	0.01186	3.58531	0.0697	3.58531	0.09722	3.59468	0.07308	3.59468	0.02584	3.59468	0.0339	3.59468	0.04546	3.59468	0.09295	3.59468	0.12175	3.59468	0.18502
3.58707	0.00949	3.58707	0.06252	3.58707	0.1014	3.59645	0.07874	3.59645	0.04009	3.59645	0.03386	3.59645	0.04878	3.59645	0.0911	3.59645	0.11623	3.59645	0.18615
3.58883	0.00746	3.58883	0.05507	3.58883	0.10238	3.59821	0.08914	3.59821	0.04912	3.59821	0.03306	3.59821	0.04833	3.59821	0.08734	3.59821	0.11014	3.59821	0.17698
3.59059	0.00576	3.59059	0.04768	3.59059	0.09977	3.59997	0.09637	3.59997	0.05897	3.59997	0.03722	3.59997	0.04642	3.59997	0.08392	3.59997	0.11097	3.59997	0.17356
3.59235	0.00438	3.59235	0.04111	3.59235	0.09413	3.60173	0.10505	3.60173	0.07196	3.60173	0.04573	3.60173	0.04899	3.60173	0.0764	3.60173	0.10415	3.60173	0.16604
3.59411	0.00376	3.59411	0.03497	3.59411	0.08654	3.6035	0.11233	3.6035	0.0767	3.6035	0.05646	3.6035	0.05409	3.6035	0.07421	3.6035	0.09714	3.6035	0.16062
3.59586	0.00346	3.59586	0.02913	3.59586	0.07743	3.60526	0.11373	3.60526	0.08945	3.60526	0.06557	3.60526	0.05057	3.60526	0.06607	3.60526	0.09394	3.60526	0.16057
3.59762	0.00305	3.59762	0.0243	3.59762	0.06828	3.60702	0.11433	3.60702	0.09622	3.60702	0.07299	3.60702	0.04955	3.60702	0.05828	3.60702	0.08291	3.60702	0.14883
3.59938	0.00276	3.59938	0.02027	3.59938	0.05948	3.60879	0.11264	3.60879	0.10432	3.60879	0.07975	3.60879	0.04549	3.60879	0.05348	3.60879	0.07155	3.60879	0.13754
3.60114	0.00242	3.60114	0.01682	3.60114	0.05123	3.61055	0.11607	3.61055	0.11414	3.61055	0.08242	3.61055	0.03981	3.61055	0.05281	3.61055	0.07023	3.61055	0.12612
3.6029	0.00225	3.6029	0.01392	3.6029	0.04395	3.61231	0.11977	3.61231	0.12738	3.61231	0.08443	3.61231	0.03677	3.61231	0.05495	3.61231	0.06665	3.61231	0.12276
3.60465	0.00197	3.60465	0.01139	3.60465	0.03722	3.61407	0.11926	3.61407	0.13906	3.61407	0.08461	3.61407	0.04127	3.61407	0.04764	3.61407	0.05941	3.61407	0.11367
3.60641	0.00163	3.60641	0.00931	3.60641	0.03161	3.61584	0.12121	3.61584	0.14939	3.61584	0.09148	3.61584	0.04072	3.61584	0.04438	3.61584	0.05587	3.61584	0.11053
3.60817	0.00147	3.60817	0.00795	3.60817	0.02683	3.6176	0.12625	3.6176	0.16905	3.6176	0.1015	3.6176	0.03756	3.6176	0.04783	3.6176	0.05525	3.6176	0.11179
3.60993	0.00129	3.60993	0.00688	3.60993	0.02254	3.61936	0.13062	3.61936	0.1796	3.61936	0.11316	3.61936	0.03887	3.61936	0.04425	3.61936	0.04308	3.61936	0.09515
3.61169	0.00107	3.61169	0.00586	3.61169	0.01908	3.62112	0.13348	3.62112	0.18992	3.62112	0.12885	3.62112	0.02884	3.62112	0.03671	3.62112	0.03741	3.62112	0.082
3.61344	0.000776911	3.61344	0.00512	3.61344	0.01613	3.62289	0.13839	3.62289	0.2106	3.62289	0.14938	3.62289	0.02462	3.62289	0.03066	3.62289	0.04468	3.62289	0.07067
3.6152	0.00064867	3.6152	0.00448	3.6152	0.01377	3.62465	0.14112	3.62465	0.22818	3.62465	0.17089	3.62465	0.02413	3.62465	0.02843	3.62465	0.03446	3.62465	0.0516
3.61696	0.000460941	3.61696	0.00385	3.61696	0.01187	3.62641	0.13862	3.62641	0.23856	3.62641	0.18621	3.62641	0.02192	3.62641	0.02073	3.62641	0.03203	3.62641	0.03998
3.61872	0.000106335	3.61872	0.00326	3.61872	0.01053	3.62817	0.13441	3.62817	0.24844	3.62817	0.19314	3.62817	0.0149	3.62817	0.01659	3.62817	0.02648	3.62817	0.03377
3.62047	-0.000175423	3.62047	0.00279	3.62047	0.00904	3.62994	0.12895	3.62994	0.26109	3.62994	0.1953	3.62994	0.01709	3.62994	0.01521	3.62994	0.02791	3.62994	0.03285
3.62223	-0.000260243	3.62223	0.00234	3.62223	0.00751	3.6317	0.12016	3.6317	0.26954	3.6317	0.19471	3.6317	0.01938	3.6317	0.01608	3.6317	0.02341	3.6317	0.02844
3.62399	-0.000299324	3.62399	0.00182	3.62399	0.00626	3.63346	0.10676	3.63346	0.26496	3.63346	0.18522	3.63346	0.01705	3.63346	0.01492	3.63346	0.02469	3.63346	0.02682
3.62575	-0.000405056	3.62575	0.00142	3.62575	0.00535	3.63522	0.0939	3.63522	0.26149	3.63522	0.17436	3.63522	0.01495	3.63522	0.01654	3.63522	0.02934	3.63522	0.02804
3.6275	-0.000274905	3.6275	0.00109	3.6275	0.00453	3.63698	0.08261	3.63698	0.2579	3.63698	0.16523	3.63698	0.02034	3.63698	0.0182	3.63698	0.02369	3.63698	0.03188
3.62926	-9.55491e-05	3.62926	0.000798573	3.62926	0.00355	3.63875	0.0708	3.63875	0.24837	3.63875	0.15108	3.63875	0.02227	3.63875	0.01417	3.63875	0.01784	3.63875	0.02812
3.63102	1.9298e-05	3.63102	0.00062392	3.63102	0.00268	3.64051	0.06333	3.64051	0.22493	3.64051	0.1421	3.64051	0.02762	3.64051	0.01469	3.64051	0.01284	3.64051	0.03472
3.63278	0.000162357	3.63278	0.000650315	3.63278	0.00241	3.64227	0.05389	3.64227	0.20611	3.64227	0.1254	3.64227	0.03498	3.64227	0.01065	3.64227	0.01017	3.64227	0.02859
3.63453	0.00023785	3.63453	0.000574943	3.63453	0.00262	3.64403	0.05013	3.64403	0.19265	3.64403	0.10566	3.64403	0.03782	3.64403	0.01051	3.64403	0.000826327	3.64403	0.02192
3.63629	0.000330128	3.63629	0.000668351	3.63629	0.00247	3.64579	0.04743	3.64579	0.1755	3.64579	0.09139	3.64579	0.0434	3.64579	0.01292	3.64579	-0.00415	3.64579	0.01498
3.63805	0.000544866	3.63805	0.00108	3.63805	0.00224	3.64756	0.04592	3.64756	0.16223	3.64756	0.07855	3.64756	0.04128	3.64756	0.01067	3.64756	0.000323082	3.64756	0.01043
3.63981	0.000669193	3.63981	0.00134	3.63981	0.00182	3.64932	0.04461	3.64932	0.14816	3.64932	0.0643	3.64932	0.04498	3.64932	0.01497	3.64932	0.00138	3.64932	0.0078
3.64156	0.000645066	3.64156	0.00126	3.64156	0.00189	3.65108	0.04416	3.65108	0.13903	3.65108	0.05486	3.65108	0.04274	3.65108	0.01732	3.65108	-0.00316	3.65108	0.00836
3.64332	0.000320198	3.64332	0.00126	3.64332	0.0018	3.65284	0.04197	3.65284	0.12194	3.65284	0.05507	3.65284	0.03694	3.65284	0.02692	3.65284	-0.00169	3.65284	0.01446
3.64508	-6.23685e-05	3.64508	0.00135	3.64508	0.00176	3.6546	0.04045	3.6546	0.11041	3.6546	0.05312	3.6546	0.04009	3.6546	0.03727	3.6546	0.00278	3.6546	0.01613
3.64684	-0.000359394	3.64684	0.00125	3.64684	0.002	3.65637	0.03931	3.65637	0.09695	3.65637	0.05452	3.65637	0.03666	3.65637	0.03912	3.65637	-0.000728934	3.65637	0.01917
3.64859	-0.000527729	3.64859	0.000975921	3.64859	0.00217	3.65813	0.03444	3.65813	0.08209	3.65813	0.05676	3.65813	0.0382	3.65813	0.04269	3.65813	0.000256887	3.65813	0.0318
3.65035	-0.000523485	3.65035	0.000885343	3.65035	0.00242	3.65989	0.03024	3.65989	0.0742	3.65989	0.05468	3.65989	0.04032	3.65989	0.04629	3.65989	0.00939	3.65989	0.03418
3.65211	-0.000626666	3.65211	0.000764271	3.65211	0.00252	3.66165	0.02832	3.66165	0.06533	3.66165	0.04955	3.66165	0.04277	3.66165	0.04504	3.66165	0.01057	3.66165	0.03471
3.65387	-0.000577266	3.65387	0.000701699	3.65387	0.00262	3.66341	0.02664	3.66341	0.06093	3.66341	0.05115	3.66341	0.04385	3.66341	0.04275	3.66341	0.01941	3.66341	0.04298
3.65562	-0.000345374	3.65562	0.000729731	3.65562	0.00264	3.66518	0.02404	3.66518	0.06164	3.66518	0.04886	3.66518	0.04605	3.66518	0.03852	3.66518	0.03037	3.66518	0.03907
3.65738	-9.96965e-06	3.65738	0.000655022	3.65738	0.00238	3.66694	0.01655	3.66694	0.05938	3.66694	0.04225	3.66694	0.05273	3.66694	0.04319	3.66694	0.03541	3.66694	0.03299
3.65914	0.000220637	3.65914	0.000587188	3.65914	0.00251	3.6687	0.01156	3.6687	0.05712	3.6687	0.03948	3.6687	0.0577	3.6687	0.04131	3.6687	0.03082	3.6687	0.02212
3.66089	0.000485378	3.66089	0.000145269	3.66089	0.00244	3.67046	0.00682	3.67046	0.05284	3.67046	0.03724	3.67046	0.06474	3.67046	0.04589	3.67046	0.02933	3.67046	0.01907
3.66265	0.000615976	3.66265	-0.000219397	3.66265	0.00226	3.67222	0.000376374	3.67222	0.04273	3.67222	0.03176	3.67222	0.07653	3.67222	0.04748	3.67222	0.02424	3.67222	0.02418
3.66441	0.00071501	3.66441	-0.000475107	3.66441	0.002	3.67398	-0.00585	3.67398	0.02895	3.67398	0.03151	3.67398	0.07444	3.67398	0.04951	3.67398	0.02119	3.67398	0.01903
3.66617	0.000821095	3.66617	-0.000639658	3.66617	0.00205	3.67575	-0.009	3.67575	0.02412	3.67575	0.03526	3.67575	0.0699	3.67575	0.05415	3.67575	0.0229	3.67575	0.02723
3.66792	0.000938238	3.66792	-0.000640821	3.66792	0.00179	3.67751	-0.01108	3.67751	0.02085	3.67751	0.03746	3.67751	0.07263	3.67751	0.05754	3.67751	0.03495	3.67751	0.03116
3.66968	0.000884708	3.66968	-0.000406902	3.66968	0.00141	3.67927	-0.01317	3.67927	0.01666	3.67927	0.04102	3.67927	0.06315	3.67927	0.06037	3.67927	0.04	3.67927	0.03708
3.67144	0.00108	3.67144	-7.75145e-05	3.67144	0.00139	3.68103	-0.01221	3.68103	0.01622	3.68103	0.0424	3.68103	0.04785	3.68103	0.06358	3.68103	0.05492	3.68103	0.03207
3.67319	0.00124	3.67319	0.000188746	3.67319	0.00144	3.68279	-0.0106	3.68279	0.01956	3.68279	0.04246	3.68279	0.03843	3.68279	0.07184	3.68279	0.0723	3.68279	0.0349
3.67495	0.00121	3.67495	0.000538895	3.67495	0.00154	3.68455	-0.00724	3.68455	0.01619	3.68455	0.04243	3.68455	0.03424	3.68455	0.07026	3.68455	0.08308	3.68455	0.04176
3.67671	0.00122	3.67671	0.00071532	3.67671	0.00183	3.68632	-0.00804	3.68632	0.01087	3.68632	0.04155	3.68632	0.02147	3.68632	0.06816	3.68632	0.08436	3.68632	0.03494
3.67846	0.00134	3.67846	0.000715029	3.67846	0.00219	3.68808	-0.00605	3.68808	0.00992	3.68808	0.04179	3.68808	0.00825	3.68808	0.06518	3.68808	0.08281	3.68808	0.04533
3.68022	0.00147	3.68022	0.000375087	3.68022	0.00244	3.68984	-0.00557	3.68984	0.00729	3.68984	0.04028	3.68984	0.01002	3.68984	0.06278	3.68984	0.08369	3.68984	0.05069
3.68198	0.00143	3.68198	4.16008e-05	3.68198	0.00246	3.6916	-0.0071	3.6916	0.00246	3.6916	0.04869	3.6916	0.000923749	3.6916	0.0565	3.6916	0.07704	3.6916	0.05734
3.68373	0.00132	3.68373	-8.20901e-05	3.68373	0.00237	3.69336	-0.0088	3.69336	-0.00192	3.69336	0.05833	3.69336	0.00226	3.69336	0.04209	3.69336	0.06317	3.69336	0.06825
3.68549	0.00105	3.68549	3.05192e-05	3.68549	0.00223	3.69512	-0.00645	3.69512	-0.00243	3.69512	0.06198	3.69512	0.00403	3.69512	0.04114	3.69512	0.05871	3.69512	0.07798
3.68725	0.000803024	3.68725	0.000180628	3.68725	0.00213	3.69688	-0.00374	3.69688	-0.00681	3.69688	0.06366	3.69688	-0.000132549	3.69688	0.03627	3.69688	0.05324	3.69688	0.08568
3.689	0.000780183	3.689	0.000361573	3.689	0.0018	3.69864	-0.00226	3.69864	-0.00947	3.69864	0.06303	3.69864	0.00322	3.69864	0.02923	3.69864	0.05124	3.69864	0.09612
3.69076	0.000849833	3.69076	0.000758558	3.69076	0.00129	3.70041	-0.00311	3.70041	-0.01398	3.70041	0.06221	3.70041	0.00732	3.70041	0.01884	3.70041	0.04653	3.70041	0.09616
3.69252	0.000902448	3.69252	0.000947625	3.69252	0.000786989	3.70217	-0.00482	3.70217	-0.01389	3.70217	0.05875	3.70217	0.00237	3.70217	0.00856	3.70217	0.03396	3.70217	0.09937
3.69427	0.000836613	3.69427	0.00104	3.69427	0.00056627	3.70393	-0.000126017	3.70393	-0.01079	3.70393	0.04902	3.70393	0.00257	3.70393	0.0051	3.70393	0.03125	3.70393	0.09723
3.69603	0.0006402	3.69603	0.000819255	3.69603	0.000545078	3.70569	-0.000565735	3.70569	-0.0134	3.70569	0.04273	3.70569	0.00387	3.70569	0.00133	3.70569	0.02956	3.70569	0.0954
3.69779	0.000525997	3.69779	0.00060197	3.69779	0.000702583	3.70745	-0.00503	3.70745	-0.01257	3.70745	0.0429	3.70745	0.00498	3.70745	0.0022	3.70745	0.02818	3.70745	0.09111
3.69954	0.000565231	3.69954	0.000437553	3.69954	0.00107	3.70921	-0.00389	3.70921	-0.00945	3.70921	0.04332	3.70921	0.00369	3.70921	0.00641	3.70921	0.0284	3.70921	0.08744
3.7013	0.000740967	3.7013	0.000362844	3.7013	0.00149	3.71097	0.000302277	3.71097	-0.00427	3.71097	0.0339	3.71097	0.01367	3.71097	0.01428	3.71097	0.03311	3.71097	0.08211
3.70306	0.000904355	3.70306	0.000520014	3.70306	0.00176	3.71273	0.00182	3.71273	-0.00369	3.71273	0.03146	3.71273	0.01882	3.71273	0.01853	3.71273	0.033	3.71273	0.07311
3.70481	0.00106	3.70481	0.000527841	3.70481	0.0018	3.71449	-0.00102	3.71449	0.000190132	3.71449	0.02748	3.71449	0.01632	3.71449	0.02117	3.71449	0.03102	3.71449	0.06553
3.70657	0.00133	3.70657	0.000624501	3.70657	0.00169	3.71626	-0.000975884	3.71626	0.00256	3.71626	0.02203	3.71626	0.01874	3.71626	0.01671	3.71626	0.02914	3.71626	0.06252
3.70832	0.00151	3.70832	0.000828191	3.70832	0.0015	3.71802	-0.00282	3.71802	-2.04031e-06	3.71802	0.02251	3.71802	0.01975	3.71802	0.01184	3.71802	0.02324	3.71802	0.05804
3.71008	0.00145	3.71008	0.000994222	3.71008	0.00162	3.71978	-0.00571	3.71978	-0.00727	3.71978	0.02404	3.71978	0.02575	3.71978	0.00401	3.71978	0.01042	3.71978	0.05141
3.71184	0.00135	3.71184	0.0011	3.71184	0.00156	3.72154	-0.00652	3.72154	-0.01481	3.72154	0.02167	3.72154	0.02464	3.72154	-0.000645634	3.72154	0.00469	3.72154	0.04905
3.71359	0.00141	3.71359	0.00101	3.71359	0.00134	3.7233	-0.00706	3.7233	-0.01793	3.7233	0.01322	3.7233	0.02215	3.7233	-0.00214	3.7233	-0.000673365	3.7233	0.0442
3.71535	0.00153	3.71535	0.000782836	3.71535	0.00124	3.72506	-0.00845	3.72506	-0.01788	3.72506	0.01135	3.72506	0.02925	3.72506	-0.000916579	3.72506	-0.00807	3.72506	0.04549
3.71711	0.00154	3.71711	0.000521706	3.71711	0.000991349	3.72682	-0.00933	3.72682	-0.01471	3.72682	0.00671	3.72682	0.0266	3.72682	0.00113	3.72682	-0.00968	3.72682	0.03665
3.71886	0.00149	3.71886	0.000279142	3.71886	0.00111	3.72858	-0.00717	3.72858	-0.00733	3.72858	0.00719	3.72858	0.02237	3.72858	0.000764873	3.72858	-0.00433	3.72858	0.02531
3.72062	0.00151	3.72062	3.19989e-05	3.72062	0.00155	3.73034	-0.00319	3.73034	0.00399	3.73034	0.00906	3.73034	0.01897	3.73034	-0.00154	3.73034	-0.00595	3.73034	0.01129
3.72237	0.00154	3.72237	4.83992e-06	3.72237	0.00196	3.7321	-0.00223	3.7321	0.00687	3.7321	0.01305	3.7321	0.01244	3.7321	-0.00234	3.7321	-0.00991	3.7321	0.00204
3.72413	0.00156	3.72413	7.29909e-05	3.72413	0.00225	3.73386	-0.0014	3.73386	0.00339	3.73386	0.02433	3.73386	0.01003	3.73386	-0.00936	3.73386	-0.01122	3.73386	-0.0064
3.72589	0.00165	3.72589	0.000102321	3.72589	0.00266	3.73562	0.00422	3.73562	0.00929	3.73562	0.02435	3.73562	0.00523	3.73562	-0.01559	3.73562	-0.01939	3.73562	-0.01961
3.72764	0.00175	3.72764	-2.32723e-05	3.72764	0.00303	3.73738	0.00955	3.73738	0.00567	3.73738	0.02745	3.73738	0.00151	3.73738	-0.01166	3.73738	-0.02404	3.73738	-0.01993
3.7294	0.00186	3.7294	-8.34117e-05	3.7294	0.00285	3.73914	0.00697	3.73914	0.00182	3.73914	0.03096	3.73914	-0.000366399	3.73914	-0.01198	3.73914	-0.0277	3.73914	-0.01509
3.73115	0.00181	3.73115	-0.000129958	3.73115	0.00251	3.74091	0.00509	3.74091	-0.000556128	3.74091	0.03515	3.74091	-0.0052	3.74091	-0.00595	3.74091	-0.0274	3.74091	-0.01773
3.73291	0.00176	3.73291	-0.000193085	3.73291	0.00227	3.74267	0.00427	3.74267	1.40848e-05	3.74267	0.03062	3.74267	-0.00301	3.74267	-0.00439	3.74267	-0.02869	3.74267	-0.01496
3.73467	0.00159	3.73467	-5.4162e-05	3.73467	0.00207	3.74443	0.0037	3.74443	-0.00217	3.74443	0.02649	3.74443	-0.00508	3.74443	0.00308	3.74443	-0.02568	3.74443	-0.00817
3.73642	0.00165	3.73642	0.000189673	3.73642	0.00199	3.74619	0.00332	3.74619	-0.004	3.74619	0.02032	3.74619	-0.00579	3.74619	0.000791555	3.74619	-0.02206	3.74619	-0.00705
3.73818	0.00166	3.73818	0.000422665	3.73818	0.00203	3.74795	0.00745	3.74795	-0.00712	3.74795	0.01243	3.74795	-0.00133	3.74795	-0.00318	3.74795	-0.0197	3.74795	-0.00522
3.73993	0.00167	3.73993	0.00044956	3.73993	0.00218	3.74971	0.01584	3.74971	-0.01503	3.74971	0.00094613	3.74971	0.00259	3.74971	-0.00669	3.74971	-0.0128	3.74971	-0.000794393
3.74169	0.00162	3.74169	0.000320104	3.74169	0.00251	3.75147	0.01771	3.75147	-0.01701	3.75147	-0.00474	3.75147	0.00365	3.75147	-0.01311	3.75147	-0.00896	3.75147	0.00448
3.74345	0.00173	3.74345	0.000332828	3.74345	0.00258	3.75323	0.01809	3.75323	-0.01623	3.75323	-0.00611	3.75323	0.00518	3.75323	-0.01316	3.75323	-0.0079	3.75323	0.00271
3.7452	0.00196	3.7452	0.000484683	3.7452	0.00252	3.75499	0.01399	3.75499	-0.01609	3.75499	-0.00501	3.75499	0.00909	3.75499	-0.01805	3.75499	-0.01193	3.75499	0.00546
3.74696	0.00206	3.74696	0.000613526	3.74696	0.00265	3.75675	0.01053	3.75675	-0.01174	3.75675	-0.000638619	3.75675	0.00547	3.75675	-0.01272	3.75675	-0.01188	3.75675	0.00504
3.74871	0.00204	3.74871	0.000585864	3.74871	0.00279	3.75851	0.0054	3.75851	-0.00862	3.75851	0.00548	3.75851	-0.01033	3.75851	-0.0094	3.75851	-0.01672	3.75851	0.00692
3.75047	0.00195	3.75047	0.00028932	3.75047	0.0027	3.76027	-0.00323	3.76027	-0.00901	3.76027	0.01	3.76027	-0.01171	3.76027	-0.00438	3.76027	-0.02245	3.76027	0.00952
3.75222	0.002	3.75222	7.81233e-05	3.75222	0.00235	3.76203	-0.00753	3.76203	-0.01046	3.76203	0.01236	3.76203	-0.0173	3.76203	0.00155	3.76203	-0.02505	3.76203	0.01507
3.75398	0.002	3.75398	0.000172668	3.75398	0.00193	3.76379	-0.0087	3.76379	-0.01066	3.76379	0.01802	3.76379	-0.03104	3.76379	0.00878	3.76379	-0.01459	3.76379	0.02659
3.75574	0.00193	3.75574	0.00019335	3.75574	0.00144	3.76555	-0.00992	3.76555	-0.01516	3.76555	0.01887	3.76555	-0.03495	3.76555	0.0134	3.76555	-0.01039	3.76555	0.0326
3.75749	0.00194	3.75749	0.000248911	3.75749	0.00112	3.76731	-0.01169	3.76731	-0.01601	3.76731	0.01465	3.76731	-0.02859	3.76731	0.01637	3.76731	-0.01248	3.76731	0.03748
3.75925	0.002	3.75925	0.000396087	3.75925	0.00108	3.76907	-0.01141	3.76907	-0.01222	3.76907	0.01531	3.76907	-0.02135	3.76907	0.023	3.76907	-0.0083	3.76907	0.03619
3.761	0.00197	3.761	0.000516127	3.761	0.00105	3.77083	-0.01065	3.77083	-0.01137	3.77083	0.01276	3.77083	-0.0207	3.77083	0.02466	3.77083	-0.00248	3.77083	0.03747
3.76276	0.00183	3.76276	0.000516021	3.76276	0.00141	3.77259	-0.01479	3.77259	-0.00872	3.77259	0.00615	3.77259	-0.01542	3.77259	0.01785	3.77259	-0.00181	3.77259	0.03221
3.76451	0.00177	3.76451	0.000456462	3.76451	0.002	3.77435	-0.0175	3.77435	-0.00289	3.77435	-0.00158	3.77435	-0.00351	3.77435	0.01138	3.77435	-0.00687	3.77435	0.02878
3.76627	0.00173	3.76627	0.000519671	3.76627	0.00249	3.77611	-0.01648	3.77611	0.00259	3.77611	-0.000888651	3.77611	0.00212	3.77611	0.00342	3.77611	0.00142	3.77611	0.02629
3.76802	0.00183	3.76802	0.000824623	3.76802	0.0028	3.77787	-0.01724	3.77787	0.00771	3.77787	-0.00535	3.77787	0.00431	3.77787	0.00459	3.77787	0.0118	3.77787	0.01398
3.76978	0.00197	3.76978	0.00122	3.76978	0.00289	3.77963	-0.01319	3.77963	0.01261	3.77963	-0.01406	3.77963	-0.0018	3.77963	0.00519	3.77963	0.0162	3.77963	0.00712
3.77153	0.00217	3.77153	0.00142	3.77153	0.00288	3.78139	-0.00791	3.78139	0.01507	3.78139	-0.0153	3.78139	-0.0016	3.78139	0.00901	3.78139	0.01835	3.78139	-0.0026
3.77329	0.00262	3.77329	0.00147	3.77329	0.00298	3.78315	-0.00191	3.78315	0.01738	3.78315	-0.01608	3.78315	0.000689675	3.78315	0.01578	3.78315	0.02499	3.78315	-0.01241
3.77504	0.00324	3.77504	0.00148	3.77504	0.00323	3.78491	0.00178	3.78491	0.02009	3.78491	-0.01882	3.78491	-0.000936069	3.78491	0.01766	3.78491	0.03103	3.78491	-0.01269
3.7768	0.00362	3.7768	0.00168	3.7768	0.00362	3.78667	0.00426	3.78667	0.02043	3.78667	-0.01876	3.78667	-0.000573097	3.78667	0.01509	3.78667	0.02532	3.78667	-0.01314
3.77856	0.00396	3.77856	0.00172	3.77856	0.00399	3.78843	0.00476	3.78843	0.01681	3.78843	-0.0189	3.78843	-0.00446	3.78843	0.00882	3.78843	0.02155	3.78843	-0.01428
3.78031	0.00405	3.78031	0.00165	3.78031	0.00432	3.79019	0.00455	3.79019	0.01673	3.79019	-0.02007	3.79019	-0.00315	3.79019	0.0052	3.79019	0.02268	3.79019	-0.0097
3.78207	0.00401	3.78207	0.00159	3.78207	0.00446	3.79195	0.00577	3.79195	0.01137	3.79195	-0.0237	3.79195	-0.00289	3.79195	-0.0008247	3.79195	0.01924	3.79195	-0.00443
3.78382	0.00387	3.78382	0.0015	3.78382	0.00461	3.79371	0.00499	3.79371	0.00344	3.79371	-0.02651	3.79371	-0.00229	3.79371	-0.00646	3.79371	0.0167	3.79371	0.00335
3.78558	0.00391	3.78558	0.00129	3.78558	0.00459	3.79547	0.00604	3.79547	-0.00162	3.79547	-0.02417	3.79547	-0.00436	3.79547	-0.00954	3.79547	0.0112	3.79547	0.00374
3.78733	0.00403	3.78733	0.00133	3.78733	0.00449	3.79723	0.00371	3.79723	-0.01301	3.79723	-0.03157	3.79723	-0.0103	3.79723	-0.00822	3.79723	0.00817	3.79723	0.01341
3.78909	0.00408	3.78909	0.00138	3.78909	0.00464	3.79899	0.00095219	3.79899	-0.01688	3.79899	-0.03731	3.79899	-0.01584	3.79899	-0.00448	3.79899	-0.00522	3.79899	0.02175
3.79084	0.00423	3.79084	0.0014	3.79084	0.00507	3.80075	-0.00227	3.80075	-0.0176	3.80075	-0.04243	3.80075	-0.01629	3.80075	0.000769212	3.80075	-0.01043	3.80075	0.0294
3.7926	0.00436	3.7926	0.00142	3.7926	0.00555	3.80251	-0.00797	3.80251	-0.01857	3.80251	-0.04579	3.80251	-0.01263	3.80251	0.00602	3.80251	-0.01569	3.80251	0.04271
3.79435	0.00456	3.79435	0.00118	3.79435	0.00554	3.80427	-0.00963	3.80427	-0.02118	3.80427	-0.04728	3.80427	-0.00658	3.80427	0.00983	3.80427	-0.01964	3.80427	0.0464
3.79611	0.00488	3.79611	0.00103	3.79611	0.00552	3.80603	-0.00875	3.80603	-0.01742	3.80603	-0.04149	3.80603	-0.00275	3.80603	0.00863	3.80603	-0.01898	3.80603	0.04094
3.79786	0.0054	3.79786	0.00121	3.79786	0.00577	3.80778	-0.00301	3.80778	-0.01439	3.80778	-0.03517	3.80778	0.00893	3.80778	0.00962	3.80778	-0.01112	3.80778	0.03867
3.79962	0.00611	3.79962	0.00161	3.79962	0.00558	3.80954	-0.00123	3.80954	-0.02189	3.80954	-0.03355	3.80954	0.01799	3.80954	0.00993	3.80954	-0.01036	3.80954	0.04256
3.80137	0.007	3.80137	0.0019	3.80137	0.00514	3.8113	0.0021	3.8113	-0.02117	3.8113	-0.03646	3.8113	0.01296	3.8113	0.0095	3.8113	-0.00609	3.8113	0.03892
3.80312	0.00824	3.80312	0.00246	3.80312	0.00499	3.81306	0.00464	3.81306	-0.01883	3.81306	-0.04035	3.81306	0.01859	3.81306	0.00881	3.81306	0.00314	3.81306	0.03553
3.80488	0.00962	3.80488	0.00291	3.80488	0.00492	3.81482	0.00632	3.81482	-0.02289	3.81482	-0.04752	3.81482	0.01007	3.81482	0.0102	3.81482	0.00386	3.81482	0.03953
3.80663	0.01135	3.80663	0.0034	3.80663	0.0049	3.81658	0.00366	3.81658	-0.02243	3.81658	-0.05177	3.81658	-0.00373	3.81658	0.00669	3.81658	0.01201	3.81658	0.0516
3.80839	0.01354	3.80839	0.0038	3.80839	0.00505	3.81834	-0.00050861	3.81834	-0.01924	3.81834	-0.05464	3.81834	-0.013	3.81834	0.00462	3.81834	0.01855	3.81834	0.05714
3.81014	0.01605	3.81014	0.00389	3.81014	0.00526	3.8201	0.00039788	3.8201	-0.02033	3.8201	-0.05722	3.8201	-0.01192	3.8201	-0.000221951	3.8201	0.01613	3.8201	0.06455
3.8119	0.01927	3.8119	0.00348	3.8119	0.00542	3.82186	0.000161807	3.82186	-0.02058	3.82186	-0.05932	3.82186	-0.01909	3.82186	-0.00897	3.82186	0.02159	3.82186	0.07259
3.81365	0.02312	3.81365	0.00312	3.81365	0.00557	3.82362	0.00247	3.82362	-0.02063	3.82362	-0.05983	3.82362	-0.01745	3.82362	-0.01062	3.82362	0.0236	3.82362	0.0737
3.81541	0.02818	3.81541	0.00331	3.81541	0.00579	3.82538	0.00115	3.82538	-0.02054	3.82538	-0.0595	3.82538	-0.01145	3.82538	-0.00838	3.82538	0.01785	3.82538	0.08966
3.81716	0.03461	3.81716	0.00363	3.81716	0.00591	3.82714	-0.000286985	3.82714	-0.02334	3.82714	-0.05761	3.82714	-0.00457	3.82714	-0.0066	3.82714	0.01699	3.82714	0.09769
3.81892	0.04268	3.81892	0.00406	3.81892	0.00588	3.8289	-0.000120305	3.8289	-0.02211	3.8289	-0.05674	3.8289	-0.005	3.8289	-0.00929	3.8289	0.02887	3.8289	0.11247
3.82067	0.05252	3.82067	0.00443	3.82067	0.00553	3.83066	-0.00339	3.83066	-0.01745	3.83066	-0.05307	3.83066	-0.00403	3.83066	-0.00875	3.83066	0.02168	3.83066	0.12178
3.82243	0.06465	3.82243	0.00462	3.82243	0.00518	3.83241	-0.00261	3.83241	-0.01446	3.83241	-0.04793	3.83241	-0.00413	3.83241	-0.000893882	3.83241	0.01995	3.83241	0.12568
3.82418	0.07874	3.82418	0.00467	3.82418	0.00511	3.83417	-0.00179	3.83417	-0.0127	3.83417	-0.04001	3.83417	-0.0042	3.83417	-0.01433	3.83417	0.03716	3.83417	0.12786
3.82593	0.09416	3.82593	0.005	3.82593	0.00513	3.83593	-0.00217	3.83593	-0.00632	3.83593	-0.03512	3.83593	-0.01163	3.83593	-0.02176	3.83593	0.04118	3.83593	0.12233
3.82769	0.11055	3.82769	0.00549	3.82769	0.00491	3.83769	-0.000987477	3.83769	-0.00718	3.83769	-0.02493	3.83769	-0.01796	3.83769	-0.0339	3.83769	0.03977	3.83769	0.11086
3.82944	0.12647	3.82944	0.00581	3.82944	0.0049	3.83945	0.000359066	3.83945	-0.01039	3.83945	-0.01383	3.83945	-0.02007	3.83945	-0.0291	3.83945	0.04651	3.83945	0.10839
3.8312	0.13979	3.8312	0.00634	3.8312	0.00521	3.84121	-0.000217757	3.84121	-0.01758	3.84121	-0.00481	3.84121	-0.0236	3.84121	-0.03089	3.84121	0.05016	3.84121	0.11019
3.83295	0.14851	3.83295	0.00713	3.83295	0.0057	3.84297	-0.00255	3.84297	-0.01877	3.84297	0.0073	3.84297	-0.02602	3.84297	-0.02864	3.84297	0.04248	3.84297	0.09884
3.83471	0.15168	3.83471	0.00791	3.83471	0.00611	3.84473	0.00123	3.84473	-0.0258	3.84473	0.01551	3.84473	-0.02555	3.84473	-0.01881	3.84473	0.03715	3.84473	0.09239
3.83646	0.14922	3.83646	0.00862	3.83646	0.00642	3.84649	0.00423	3.84649	-0.03341	3.84649	0.02598	3.84649	-0.02436	3.84649	-0.00602	3.84649	0.03769	3.84649	0.09398
3.83821	0.14106	3.83821	0.00957	3.83821	0.00636	3.84824	0.00436	3.84824	-0.04055	3.84824	0.0356	3.84824	-0.01939	3.84824	0.00116	3.84824	0.02787	3.84824	0.08893
3.83997	0.12831	3.83997	0.01053	3.83997	0.0067	3.85	0.00564	3.85	-0.04412	3.85	0.04395	3.85	-0.01905	3.85	0.000836948	3.85	0.02362	3.85	0.07621
3.84172	0.11281	3.84172	0.01159	3.84172	0.0075	3.85176	0.00414	3.85176	-0.04667	3.85176	0.04204	3.85176	-0.02206	3.85176	0.00399	3.85176	0.02269	3.85176	0.07309
3.84348	0.09691	3.84348	0.013	3.84348	0.0081	3.85352	0.00623	3.85352	-0.04986	3.85352	0.03874	3.85352	-0.02512	3.85352	0.00863	3.85352	0.0221	3.85352	0.07064
3.84523	0.0819	3.84523	0.01453	3.84523	0.00842	3.85528	0.0032	3.85528	-0.04956	3.85528	0.03177	3.85528	-0.01917	3.85528	0.00328	3.85528	0.01577	3.85528	0.06058
3.84699	0.06844	3.84699	0.01623	3.84699	0.00917	3.85704	0.00335	3.85704	-0.04193	3.85704	0.02012	3.85704	-0.02009	3.85704	2.34052e-05	3.85704	0.01145	3.85704	0.05565
3.84874	0.05646	3.84874	0.01849	3.84874	0.00991	3.8588	0.00521	3.8588	-0.03681	3.8588	0.01001	3.8588	-0.02352	3.8588	8.28773e-05	3.8588	0.00931	3.8588	0.05199
3.85049	0.04641	3.85049	0.02111	3.85049	0.01031	3.86056	0.00348	3.86056	-0.03469	3.86056	-0.00172	3.86056	-0.01506	3.86056	-0.00756	3.86056	0.00933	3.86056	0.05008
3.85225	0.03818	3.85225	0.0241	3.85225	0.01046	3.86231	0.00168	3.86231	-0.02985	3.86231	-0.01047	3.86231	-0.01231	3.86231	-0.00338	3.86231	0.00919	3.86231	0.05132
3.854	0.03155	3.854	0.02728	3.854	0.0112	3.86407	0.000547423	3.86407	-0.02487	3.86407	-0.00938	3.86407	-0.01135	3.86407	-0.00455	3.86407	0.00551	3.86407	0.04758
3.85575	0.02616	3.85575	0.03122	3.85575	0.01237	3.86583	-0.00129	3.86583	-0.0249	3.86583	-0.01408	3.86583	-0.01444	3.86583	0.00113	3.86583	0.00246	3.86583	0.04788
3.85751	0.0218	3.85751	0.03594	3.85751	0.01355	3.86759	-0.00176	3.86759	-0.02597	3.86759	-0.01533	3.86759	-0.01236	3.86759	0.0042	3.86759	-0.00254	3.86759	0.04425
3.85926	0.0183	3.85926	0.04147	3.85926	0.01457	3.86935	-0.00242	3.86935	-0.02526	3.86935	-0.00815	3.86935	-0.01468	3.86935	0.00594	3.86935	-0.00938	3.86935	0.04317
3.86102	0.01558	3.86102	0.0479	3.86102	0.01572	3.87111	-0.00224	3.87111	-0.02157	3.87111	-0.0036	3.87111	-0.01997	3.87111	0.01282	3.87111	-0.01909	3.87111	0.04058
3.86277	0.01345	3.86277	0.05527	3.86277	0.01663	3.87286	-0.0011	3.87286	-0.02344	3.87286	-0.01134	3.87286	-0.02742	3.87286	0.01204	3.87286	-0.02375	3.87286	0.03518
3.86452	0.01169	3.86452	0.06375	3.86452	0.01767	3.87462	0.000985291	3.87462	-0.02702	3.87462	-0.01872	3.87462	-0.03316	3.87462	0.01126	3.87462	-0.01766	3.87462	0.03279
3.86628	0.01022	3.86628	0.07301	3.86628	0.0191	3.87638	0.00313	3.87638	-0.02919	3.87638	-0.02495	3.87638	-0.04538	3.87638	0.00686	3.87638	-0.01704	3.87638	0.0303
3.86803	0.00869	3.86803	0.08294	3.86803	0.02091	3.87814	0.00447	3.87814	-0.03616	3.87814	-0.02824	3.87814	-0.05259	3.87814	0.00852	3.87814	-0.01338	3.87814	0.02176
3.86979	0.00759	3.86979	0.09402	3.86979	0.02277	3.8799	0.0051	3.8799	-0.03765	3.8799	-0.03655	3.8799	-0.05391	3.8799	0.00861	3.8799	-0.00958	3.8799	0.01856
3.87154	0.00699	3.87154	0.1049	3.87154	0.02491	3.88166	0.00157	3.88166	-0.03578	3.88166	-0.04149	3.88166	-0.05447	3.88166	0.00716	3.88166	-0.01476	3.88166	0.01852
3.87329	0.00662	3.87329	0.11515	3.87329	0.02768	3.88341	-0.0011	3.88341	-0.03354	3.88341	-0.04027	3.88341	-0.04907	3.88341	0.00558	3.88341	-0.00989	3.88341	0.01454
3.87505	0.0063	3.87505	0.12412	3.87505	0.03043	3.88517	0.00196	3.88517	-0.03131	3.88517	-0.04742	3.88517	-0.04672	3.88517	0.00581	3.88517	-0.00779	3.88517	0.00299
3.8768	0.00599	3.8768	0.13086	3.8768	0.03344	3.88693	-0.000155087	3.88693	-0.02252	3.88693	-0.04476	3.88693	-0.0397	3.88693	0.00835	3.88693	-0.00361	3.88693	0.01196
3.87855	0.00565	3.87855	0.13471	3.87855	0.03691	3.88869	-0.0023	3.88869	-0.0157	3.88869	-0.04137	3.88869	-0.03755	3.88869	0.00659	3.88869	-0.00229	3.88869	0.0141
3.88031	0.00517	3.88031	0.13521	3.88031	0.0411	3.89045	0.00192	3.89045	-0.01672	3.89045	-0.03528	3.89045	-0.03651	3.89045	0.00359	3.89045	0.00511	3.89045	0.01809
3.88206	0.00471	3.88206	0.13265	3.88206	0.04575	3.8922	0.000678984	3.8922	-0.01206	3.8922	-0.03518	3.8922	-0.03456	3.8922	0.0026	3.8922	0.00811	3.8922	0.02326
3.88381	0.00432	3.88381	0.12744	3.88381	0.05061	3.89396	-0.00264	3.89396	-0.01164	3.89396	-0.02747	3.89396	-0.033	3.89396	-0.000134026	3.89396	0.00358	3.89396	0.01724
3.88557	0.00408	3.88557	0.12016	3.88557	0.05581	3.89572	-0.00531	3.89572	-0.01323	3.89572	-0.02327	3.89572	-0.03971	3.89572	-0.00315	3.89572	0.01065	3.89572	0.02429
3.88732	0.00394	3.88732	0.11138	3.88732	0.06199	3.89748	-0.00638	3.89748	-0.01607	3.89748	-0.02931	3.89748	-0.04259	3.89748	-0.00299	3.89748	0.01134	3.89748	0.02846
3.88907	0.00365	3.88907	0.10172	3.88907	0.0693	3.89924	-0.00749	3.89924	-0.01326	3.89924	-0.03057	3.89924	-0.04516	3.89924	-0.00249	3.89924	0.00612	3.89924	0.01533
3.89083	0.00321	3.89083	0.09169	3.89083	0.0776	3.90099	-0.00685	3.90099	-0.00809	3.90099	-0.03214	3.90099	-0.04717	3.90099	-0.00141	3.90099	0.01055	3.90099	0.01027
3.89258	0.00296	3.89258	0.08217	3.89258	0.08635	3.90275	-0.00548	3.90275	-0.0032	3.90275	-0.03144	3.90275	-0.05002	3.90275	0.00908	3.90275	0.0033	3.90275	0.01446
3.89433	0.00279	3.89433	0.07315	3.89433	0.09499	3.90451	-0.00714	3.90451	0.00359	3.90451	-0.02825	3.90451	-0.05138	3.90451	0.0168	3.90451	0.00683	3.90451	0.02024
3.89609	0.00273	3.89609	0.06466	3.89609	0.10379	3.90627	-0.00374	3.90627	0.00869	3.90627	-0.02702	3.90627	-0.03802	3.90627	0.02012	3.90627	0.00904	3.90627	0.00433
3.89784	0.00274	3.89784	0.0569	3.89784	0.11262	3.90803	-0.00342	3.90803	0.00908	3.90803	-0.01928	3.90803	-0.04255	3.90803	0.01876	3.90803	0.0079	3.90803	0.0077
3.89959	0.00261	3.89959	0.04966	3.89959	0.1208	3.90978	-0.00433	3.90978	0.00737	3.90978	-0.01515	3.90978	-0.04675	3.90978	0.01456	3.90978	0.01109	3.90978	0.02017
3.90135	0.00227	3.90135	0.04331	3.90135	0.12785	3.91154	-0.00426	3.91154	0.00572	3.91154	-0.01065	3.91154	-0.03687	3.91154	0.00466	3.91154	0.01122	3.91154	0.0256
3.9031	0.0019	3.9031	0.03786	3.9031	0.13365	3.9133	-0.00581	3.9133	0.0021	3.9133	-0.00758	3.9133	-0.02606	3.9133	0.00165	3.9133	0.01329	3.9133	0.03758
3.90485	0.00159	3.90485	0.0333	3.90485	0.13736	3.91506	-0.00325	3.91506	-0.00513	3.91506	-0.00487	3.91506	-0.01768	3.91506	0.0047	3.91506	-0.000881441	3.91506	0.03888
3.90661	0.00134	3.90661	0.02964	3.90661	0.13866	3.91681	5.10801e-05	3.91681	-0.00743	3.91681	-0.00985	3.91681	-0.00999	3.91681	0.00628	3.91681	0.00254	3.91681	0.04786
3.90836	0.00132	3.90836	0.02644	3.90836	0.13791	3.91857	0.00332	3.91857	-0.01383	3.91857	-0.00933	3.91857	-0.00385	3.91857	0.01011	3.91857	0.0067	3.91857	0.05364
3.91011	0.00143	3.91011	0.02354	3.91011	0.1351	3.92033	0.0074	3.92033	-0.0183	3.92033	-0.00961	3.92033	-0.00665	3.92033	0.01567	3.92033	0.00584	3.92033	0.05571
3.91186	0.00162	3.91186	0.02094	3.91186	0.13035	3.92209	0.00455	3.92209	-0.02	3.92209	-0.01261	3.92209	-0.01537	3.92209	0.01983	3.92209	0.01106	3.92209	0.0554
3.91362	0.0016	3.91362	0.01853	3.91362	0.12414	3.92384	0.00465	3.92384	-0.02502	3.92384	-0.01846	3.92384	-0.01639	3.92384	0.01775	3.92384	0.012	3.92384	0.04815
3.91537	0.00153	3.91537	0.01645	3.91537	0.11714	3.9256	0.00273	3.9256	-0.022	3.9256	-0.02243	3.9256	-0.02718	3.9256	0.02396	3.9256	0.01481	3.9256	0.04742
3.91712	0.0015	3.91712	0.01476	3.91712	0.10959	3.92736	-3.39405e-05	3.92736	-0.01137	3.92736	-0.0253	3.92736	-0.03057	3.92736	0.02297	3.92736	0.01072	3.92736	0.04775
3.91888	0.00153	3.91888	0.01324	3.91888	0.10216	3.92912	0.00138	3.92912	-0.00264	3.92912	-0.03124	3.92912	-0.02782	3.92912	0.02343	3.92912	0.00664	3.92912	0.04418
3.92063	0.00175	3.92063	0.01191	3.92063	0.09479	3.93087	0.00505	3.93087	0.00466	3.93087	-0.03108	3.93087	-0.02531	3.93087	0.02043	3.93087	0.0063	3.93087	0.04391
3.92238	0.00178	3.92238	0.01077	3.92238	0.08743	3.93263	0.00829	3.93263	0.01424	3.93263	-0.0287	3.93263	-0.02499	3.93263	0.01803	3.93263	0.00311	3.93263	0.04546
3.92413	0.00181	3.92413	0.00973	3.92413	0.08038	3.93439	0.01162	3.93439	0.02421	3.93439	-0.02234	3.93439	-0.02009	3.93439	0.01557	3.93439	0.00369	3.93439	0.04875
3.92589	0.00174	3.92589	0.00896	3.92589	0.0739	3.93615	0.01488	3.93615	0.02671	3.93615	-0.02111	3.93615	-0.0095	3.93615	0.01321	3.93615	0.00722	3.93615	0.0439
3.92764	0.00182	3.92764	0.00844	3.92764	0.06733	3.9379	0.01594	3.9379	0.02426	3.9379	-0.02092	3.9379	-0.01359	3.9379	0.01436	3.9379	0.000605772	3.9379	0.04202
3.92939	0.00188	3.92939	0.00797	3.92939	0.06129	3.93966	0.01355	3.93966	0.02432	3.93966	-0.01757	3.93966	-0.01199	3.93966	0.01445	3.93966	0.00118	3.93966	0.042
3.93115	0.00181	3.93115	0.00751	3.93115	0.05564	3.94142	0.0125	3.94142	0.01964	3.94142	-0.0169	3.94142	-0.01272	3.94142	0.01937	3.94142	0.00622	3.94142	0.036
3.9329	0.0016	3.9329	0.00715	3.9329	0.05116	3.94318	0.01393	3.94318	0.01297	3.94318	-0.02002	3.94318	-0.01503	3.94318	0.02039	3.94318	0.01177	3.94318	0.03759
3.93465	0.00145	3.93465	0.00684	3.93465	0.04701	3.94493	0.01585	3.94493	0.00551	3.94493	-0.01721	3.94493	-0.00755	3.94493	0.02618	3.94493	0.01799	3.94493	0.04189
3.9364	0.00141	3.9364	0.00636	3.9364	0.04282	3.94669	0.01487	3.94669	-0.00705	3.94669	-0.01107	3.94669	-0.00641	3.94669	0.02912	3.94669	0.02068	3.94669	0.04822
3.93816	0.00139	3.93816	0.00586	3.93816	0.03916	3.94845	0.01403	3.94845	-0.01192	3.94845	-0.01015	3.94845	-0.000948845	3.94845	0.02898	3.94845	0.02763	3.94845	0.04279
3.93991	0.00142	3.93991	0.00528	3.93991	0.03589	3.9502	0.0111	3.9502	-0.01347	3.9502	-0.011	3.9502	0.00758	3.9502	0.02388	3.9502	0.02712	3.9502	0.04246
3.94166	0.00151	3.94166	0.00481	3.94166	0.03278	3.95196	0.0074	3.95196	-0.01668	3.95196	-0.00895	3.95196	0.01353	3.95196	0.02124	3.95196	0.02516	3.95196	0.04028
3.94341	0.00148	3.94341	0.00444	3.94341	0.02992	3.95372	0.00161	3.95372	-0.01578	3.95372	-0.0071	3.95372	0.01533	3.95372	0.01876	3.95372	0.01667	3.95372	0.04579
3.94517	0.00149	3.94517	0.00419	3.94517	0.02766	3.95547	-0.00245	3.95547	-0.01408	3.95547	-0.00902	3.95547	0.02128	3.95547	0.01793	3.95547	0.01234	3.95547	0.03456
3.94692	0.00141	3.94692	0.00411	3.94692	0.02578	3.95723	-0.00248	3.95723	-0.0133	3.95723	-0.01267	3.95723	0.02503	3.95723	0.02089	3.95723	0.01721	3.95723	0.03203
3.94867	0.00131	3.94867	0.00387	3.94867	0.02397	3.95899	-0.00555	3.95899	-0.01863	3.95899	-0.00769	3.95899	0.01498	3.95899	0.01759	3.95899	0.01721	3.95899	0.03849
3.95042	0.00131	3.95042	0.0037	3.95042	0.02208	3.96075	-0.00423	3.96075	-0.01342	3.96075	-0.00661	3.96075	0.00694	3.96075	0.01867	3.96075	0.0193	3.96075	0.03938
3.95217	0.00148	3.95217	0.00354	3.95217	0.02027	3.9625	-0.00133	3.9625	-0.01008	3.9625	-0.00604	3.9625	0.00799	3.9625	0.01527	3.9625	0.02832	3.9625	0.02998
3.95393	0.00164	3.95393	0.00341	3.95393	0.0189	3.96426	0.00569	3.96426	-0.01067	3.96426	-0.00496	3.96426	-0.01026	3.96426	0.0078	3.96426	0.02862	3.96426	0.03715
3.95568	0.00172	3.95568	0.00329	3.95568	0.01771	3.96602	0.0127	3.96602	-0.00335	3.96602	-0.00082199	3.96602	-0.02515	3.96602	0.0046	3.96602	0.03795	3.96602	0.04122
3.95743	0.00184	3.95743	0.00297	3.95743	0.01686	3.96777	0.01823	3.96777	0.00464	3.96777	0.01044	3.96777	-0.0309	3.96777	0.01042	3.96777	0.03865	3.96777	0.04554
3.95918	0.00179	3.95918	0.00263	3.95918	0.01579	3.96953	0.02771	3.96953	0.00531	3.96953	0.00706	3.96953	-0.02677	3.96953	0.01537	3.96953	0.04373	3.96953	0.04125
3.96094	0.00153	3.96094	0.00239	3.96094	0.01507	3.97129	0.03611	3.97129	0.0056	3.97129	0.00579	3.97129	-0.02922	3.97129	0.01484	3.97129	0.04337	3.97129	0.04158
3.96269	0.00123	3.96269	0.00245	3.96269	0.01454	3.97304	0.0378	3.97304	0.00822	3.97304	-0.0034	3.97304	-0.02248	3.97304	0.02589	3.97304	0.04784	3.97304	0.05139
3.96444	0.00105	3.96444	0.00256	3.96444	0.01393	3.9748	0.0439	3.9748	0.01122	3.9748	-0.00851	3.9748	-0.00747	3.9748	0.02127	3.9748	0.05124	3.9748	0.05441
3.96619	0.000879607	3.96619	0.00266	3.96619	0.01314	3.97656	0.05024	3.97656	0.01151	3.97656	-0.01567	3.97656	-0.00348	3.97656	0.01608	3.97656	0.04677	3.97656	0.06207
3.96794	0.000762852	3.96794	0.00274	3.96794	0.01213	3.97831	0.04791	3.97831	0.01893	3.97831	-0.0189	3.97831	0.00167	3.97831	0.019	3.97831	0.05154	3.97831	0.07501
3.9697	0.000690145	3.9697	0.00279	3.9697	0.01127	3.98007	0.04951	3.98007	0.02122	3.98007	-0.01004	3.98007	0.00406	3.98007	0.01793	3.98007	0.05224	3.98007	0.08953
3.97145	0.000708585	3.97145	0.00262	3.97145	0.01052	3.98183	0.05637	3.98183	0.02615	3.98183	-0.00841	3.98183	0.00641	3.98183	0.01636	3.98183	0.05817	3.98183	0.09083
3.9732	0.000673243	3.9732	0.00211	3.9732	0.01017	3.98358	0.05546	3.98358	0.02789	3.98358	-0.00327	3.98358	0.00465	3.98358	0.02403	3.98358	0.05698	3.98358	0.09754
3.97495	0.000712694	3.97495	0.00164	3.97495	0.01	3.98534	0.05511	3.98534	0.02944	3.98534	0.0036	3.98534	0.00829	3.98534	0.03398	3.98534	0.06165	3.98534	0.10648
3.9767	0.000965848	3.9767	0.00151	3.9767	0.00988	3.9871	0.06697	3.9871	0.03072	3.9871	0.00888	3.9871	0.01939	3.9871	0.03278	3.9871	0.06621	3.9871	0.09765
3.97846	0.00108	3.97846	0.00158	3.97846	0.00975	3.98885	0.07494	3.98885	0.02949	3.98885	0.00969	3.98885	0.02043	3.98885	0.03574	3.98885	0.06981	3.98885	0.10223
3.98021	0.00119	3.98021	0.00164	3.98021	0.00947	3.99061	0.07876	3.99061	0.0327	3.99061	0.01489	3.99061	0.02231	3.99061	0.04441	3.99061	0.08051	3.99061	0.10774
3.98196	0.00128	3.98196	0.00174	3.98196	0.00865	3.99236	0.09357	3.99236	0.03741	3.99236	0.0258	3.99236	0.02589	3.99236	0.0507	3.99236	0.08163	3.99236	0.10494
3.98371	0.00146	3.98371	0.00191	3.98371	0.00802	3.99412	0.09912	3.99412	0.04791	3.99412	0.03154	3.99412	0.02522	3.99412	0.05328	3.99412	0.08465	3.99412	0.09685
3.98546	0.00147	3.98546	0.00198	3.98546	0.0076	3.99588	0.11133	3.99588	0.05389	3.99588	0.04115	3.99588	0.0199	3.99588	0.06156	3.99588	0.08222	3.99588	0.0945
3.98721	0.00133	3.98721	0.00177	3.98721	0.00735	3.99763	0.1177	3.99763	0.06154	3.99763	0.0455	3.99763	0.02154	3.99763	0.07047	3.99763	0.07522	3.99763	0.09024
3.98897	0.00127	3.98897	0.00149	3.98897	0.00709	3.99939	0.11946	3.99939	0.06677	3.99939	0.0428	3.99939	0.02024	3.99939	0.07283	3.99939	0.06743	3.99939	0.08808
3.99072	0.00109	3.99072	0.0011	3.99072	0.00703	4.00115	0.11639	4.00115	0.07545	4.00115	0.03652	4.00115	0.01598	4.00115	0.0759	4.00115	0.06187	4.00115	0.09319
3.99247	0.0009728	3.99247	0.000791565	3.99247	0.00688	4.0029	0.11607	4.0029	0.08246	4.0029	0.03036	4.0029	0.01497	4.0029	0.06668	4.0029	0.05964	4.0029	0.09011
3.99422	0.00109	3.99422	0.000659331	3.99422	0.00683	4.00466	0.11154	4.00466	0.08135	4.00466	0.03159	4.00466	0.02181	4.00466	0.06254	4.00466	0.06447	4.00466	0.09322
3.99597	0.00131	3.99597	0.000903143	3.99597	0.00712	4.00641	0.10863	4.00641	0.08273	4.00641	0.03124	4.00641	0.01735	4.00641	0.0575	4.00641	0.07174	4.00641	0.10094
3.99772	0.00147	3.99772	0.00101	3.99772	0.00738	4.00817	0.11491	4.00817	0.08136	4.00817	0.03595	4.00817	0.00865	4.00817	0.05524	4.00817	0.07328	4.00817	0.10433
3.99947	0.00151	3.99947	0.0011	3.99947	0.00746	4.00993	0.11539	4.00993	0.08188	4.00993	0.03872	4.00993	0.0075	4.00993	0.04709	4.00993	0.07903	4.00993	0.10428
4.00123	0.00152	4.00123	0.00112	4.00123	0.00713	4.01168	0.10828	4.01168	0.08247	4.01168	0.04539	4.01168	0.00484	4.01168	0.04522	4.01168	0.07868	4.01168	0.1062
4.00298	0.00151	4.00298	0.00133	4.00298	0.00665	4.01344	0.10162	4.01344	0.08816	4.01344	0.04399	4.01344	0.00505	4.01344	0.04462	4.01344	0.0745	4.01344	0.10711
4.00473	0.00167	4.00473	0.00132	4.00473	0.00604	4.01519	0.0927	4.01519	0.09467	4.01519	0.04606	4.01519	0.00872	4.01519	0.04521	4.01519	0.07397	4.01519	0.09478
4.00648	0.0018	4.00648	0.00138	4.00648	0.00559	4.01695	0.08288	4.01695	0.10125	4.01695	0.04724	4.01695	0.02319	4.01695	0.03564	4.01695	0.07587	4.01695	0.09215
4.00823	0.00195	4.00823	0.00142	4.00823	0.00556	4.01871	0.07469	4.01871	0.11162	4.01871	0.04877	4.01871	0.03118	4.01871	0.03098	4.01871	0.07683	4.01871	0.09396
4.00998	0.0021	4.00998	0.00154	4.00998	0.00539	4.02046	0.06157	4.02046	0.12148	4.02046	0.05133	4.02046	0.03304	4.02046	0.02267	4.02046	0.07569	4.02046	0.0864
4.01173	0.00215	4.01173	0.00165	4.01173	0.00532	4.02222	0.06025	4.02222	0.12432	4.02222	0.05268	4.02222	0.03507	4.02222	0.01885	4.02222	0.07952	4.02222	0.08749
4.01349	0.00207	4.01349	0.00173	4.01349	0.0051	4.02397	0.06048	4.02397	0.1292	4.02397	0.05781	4.02397	0.02474	4.02397	0.01327	4.02397	0.0667	4.02397	0.08736
4.01524	0.00197	4.01524	0.00172	4.01524	0.0051	4.02573	0.05615	4.02573	0.1325	4.02573	0.06127	4.02573	0.02206	4.02573	0.01704	4.02573	0.05336	4.02573	0.09228
4.01699	0.00199	4.01699	0.00162	4.01699	0.00512	4.02748	0.05499	4.02748	0.12985	4.02748	0.06756	4.02748	0.01489	4.02748	0.01559	4.02748	0.04353	4.02748	0.09446
4.01874	0.00191	4.01874	0.00152	4.01874	0.00509	4.02924	0.05804	4.02924	0.12336	4.02924	0.07077	4.02924	0.01425	4.02924	0.01496	4.02924	0.03676	4.02924	0.09738
4.02049	0.00182	4.02049	0.00133	4.02049	0.00491	4.031	0.06055	4.031	0.11786	4.031	0.07551	4.031	0.01318	4.031	0.01389	4.031	0.02563	4.031	0.09209
4.02224	0.00166	4.02224	0.00121	4.02224	0.00469	4.03275	0.05985	4.03275	0.11243	4.03275	0.07199	4.03275	0.01048	4.03275	0.01814	4.03275	0.0251	4.03275	0.08629
4.02399	0.00144	4.02399	0.00114	4.02399	0.00425	4.03451	0.06101	4.03451	0.10322	4.03451	0.06854	4.03451	0.00996	4.03451	0.0115	4.03451	0.03149	4.03451	0.08915
4.02574	0.0012	4.02574	0.00124	4.02574	0.00421	4.03626	0.05884	4.03626	0.1019	4.03626	0.06564	4.03626	0.01041	4.03626	0.01011	4.03626	0.03695	4.03626	0.09373
4.02749	0.00108	4.02749	0.00144	4.02749	0.00415	4.03802	0.05877	4.03802	0.10164	4.03802	0.06029	4.03802	0.01142	4.03802	0.01238	4.03802	0.04955	4.03802	0.10384
4.02924	0.0011	4.02924	0.00157	4.02924	0.0042	4.03977	0.05505	4.03977	0.09798	4.03977	0.05598	4.03977	0.00398	4.03977	0.01826	4.03977	0.05415	4.03977	0.11872
4.031	0.00123	4.031	0.00168	4.031	0.00405	4.04153	0.05506	4.04153	0.0962	4.04153	0.0515	4.04153	0.00559	4.04153	0.0177	4.04153	0.05842	4.04153	0.13215
4.03275	0.0014	4.03275	0.00197	4.03275	0.00329	4.04329	0.05409	4.04329	0.08777	4.04329	0.05313	4.04329	0.01348	4.04329	0.01932	4.04329	0.05993	4.04329	0.14187
4.0345	0.00141	4.0345	0.00202	4.0345	0.00322	4.04504	0.05213	4.04504	0.0806	4.04504	0.05194	4.04504	0.01008	4.04504	0.02405	4.04504	0.05756	4.04504	0.14774
4.03625	0.0014	4.03625	0.00203	4.03625	0.00371	4.0468	0.05333	4.0468	0.07318	4.0468	0.05259	4.0468	0.01301	4.0468	0.02	4.0468	0.05176	4.0468	0.15642
4.038	0.00138	4.038	0.002	4.038	0.00406	4.04855	0.05311	4.04855	0.07347	4.04855	0.05738	4.04855	0.01498	4.04855	0.01844	4.04855	0.05066	4.04855	0.16403
4.03975	0.00147	4.03975	0.00194	4.03975	0.00401	4.05031	0.05612	4.05031	0.07142	4.05031	0.06048	4.05031	0.01546	4.05031	0.02002	4.05031	0.05875	4.05031	0.17334
4.0415	0.00151	4.0415	0.00177	4.0415	0.00396	4.05206	0.05587	4.05206	0.0736	4.05206	0.06219	4.05206	0.01016	4.05206	0.02829	4.05206	0.06177	4.05206	0.17635
4.04325	0.00153	4.04325	0.00158	4.04325	0.00369	4.05382	0.06017	4.05382	0.07679	4.05382	0.05834	4.05382	0.00793	4.05382	0.03263	4.05382	0.06553	4.05382	0.17901
4.045	0.00166	4.045	0.00135	4.045	0.0036	4.05557	0.05586	4.05557	0.07547	4.05557	0.06417	4.05557	0.000381452	4.05557	0.04142	4.05557	0.06971	4.05557	0.17476
4.04675	0.00188	4.04675	0.00135	4.04675	0.00406	4.05733	0.05468	4.05733	0.07381	4.05733	0.05922	4.05733	-0.00344	4.05733	0.0426	4.05733	0.06051	4.05733	0.16977
4.0485	0.00185	4.0485	0.00161	4.0485	0.0046	4.05908	0.06027	4.05908	0.06892	4.05908	0.05549	4.05908	0.00116	4.05908	0.04117	4.05908	0.06052	4.05908	0.16768
4.05025	0.00172	4.05025	0.00175	4.05025	0.00506	4.06084	0.05624	4.06084	0.06676	4.06084	0.04818	4.06084	0.00309	4.06084	0.03869	4.06084	0.06185	4.06084	0.16511
4.052	0.00161	4.052	0.00165	4.052	0.00553	4.06259	0.0536	4.06259	0.05962	4.06259	0.0479	4.06259	0.0067	4.06259	0.0349	4.06259	0.05917	4.06259	0.15755
4.05375	0.0015	4.05375	0.00167	4.05375	0.00585	4.06435	0.0519	4.06435	0.05476	4.06435	0.04867	4.06435	0.01106	4.06435	0.03162	4.06435	0.04886	4.06435	0.14988
4.05551	0.0013	4.05551	0.00166	4.05551	0.00592	4.0661	0.04599	4.0661	0.04928	4.0661	0.04743	4.0661	0.01819	4.0661	0.02662	4.0661	0.05085	4.0661	0.1462
4.05726	0.000991688	4.05726	0.00139	4.05726	0.00581	4.06786	0.03828	4.06786	0.04417	4.06786	0.05	4.06786	0.01323	4.06786	0.02464	4.06786	0.0525	4.06786	0.13529
4.05901	0.000912242	4.05901	0.00102	4.05901	0.00571	4.06961	0.03243	4.06961	0.03916	4.06961	0.05524	4.06961	0.00937	4.06961	0.01987	4.06961	0.05385	4.06961	0.1237
4.06076	0.000988067	4.06076	0.00108	4.06076	0.00529	4.07137	0.03356	4.07137	0.03481	4.07137	0.05853	4.07137	0.00209	4.07137	0.01491	4.07137	0.058	4.07137	0.12152
4.06251	0.00106	4.06251	0.0011	4.06251	0.00482	4.07312	0.0297	4.07312	0.03263	4.07312	0.05815	4.07312	-0.0034	4.07312	0.01688	4.07312	0.05924	4.07312	0.12133
4.06426	0.00122	4.06426	0.00102	4.06426	0.00453	4.07488	0.02758	4.07488	0.02822	4.07488	0.05797	4.07488	-0.01024	4.07488	0.01525	4.07488	0.06271	4.07488	0.11852
4.06601	0.00119	4.06601	0.000778289	4.06601	0.00398	4.07663	0.02919	4.07663	0.02295	4.07663	0.05401	4.07663	-0.01792	4.07663	0.01173	4.07663	0.06349	4.07663	0.11737
4.06776	0.00119	4.06776	0.000721481	4.06776	0.00346	4.07839	0.03052	4.07839	0.02406	4.07839	0.0514	4.07839	-0.00739	4.07839	0.01592	4.07839	0.06535	4.07839	0.1208
4.06951	0.00134	4.06951	0.000933898	4.06951	0.003	4.08014	0.02533	4.08014	0.01944	4.08014	0.05202	4.08014	-0.00646	4.08014	0.02374	4.08014	0.06034	4.08014	0.11728
4.07126	0.00155	4.07126	0.000931043	4.07126	0.00284	4.0819	0.02452	4.0819	0.01777	4.0819	0.04902	4.0819	-0.00121	4.0819	0.02851	4.0819	0.06136	4.0819	0.11013
4.07301	0.00161	4.07301	0.000821633	4.07301	0.00267	4.08365	0.02429	4.08365	0.01271	4.08365	0.05807	4.08365	0.01129	4.08365	0.0312	4.08365	0.06323	4.08365	0.10779
4.07476	0.00152	4.07476	0.00085165	4.07476	0.00295	4.08541	0.01992	4.08541	0.00995	4.08541	0.07282	4.08541	0.01365	4.08541	0.03199	4.08541	0.06856	4.08541	0.1087
[truncated: 1,002 more rows]
